# Supplementary material for: The Fitness Landscapes of cis-Acting Binding Sites in Different Promoter and Environmental Contexts
Source: PLoS Genet. 2010 Jul 29;6(7):e1001042. doi: 10.1371/journal.pgen.1001042 (PMC2912393; doi:10.1371/journal.pgen.1001042)
Supplement: Table S2 — Number of Counts and Relative Fitness of each −35 for each conditions, sorted by fitness. (4.02 MB XLS) [file pgen.1001042.s004.xls]

## Sheet: Sheet2
Table S1: Number of counts and Relative Fitness of each -35 for each conditions, sorted by fitness.
Mar:TAT Tet-5 (1)	Mar:TAT Tet-5 (1)	Mar:TAT Tet-5 (1)	Mar:TAT Tet-10 (1)	Mar:TAT Tet-10 (1)	Mar:TAT Tet-10 (1)	Mar:TAT Tet-15 (1)	Mar:TAT Tet-15 (1)	Mar:TAT Tet-15 (1)	Mar:TAT Tet-30 (1)	Mar:TAT Tet-30 (1)	Mar:TAT Tet-30 (1)		Mar:TTT Tet-5 (1)	Mar:TTT Tet-5 (1)	Mar:TTT Tet-5 (1)	Mar:TTT Tet-10 (1)	Mar:TTT Tet-10 (1)	Mar:TTT Tet-10 (1)	Mar:TTT Tet-15 (1)	Mar:TTT Tet-15 (1)	Mar:TTT Tet-15 (1)	Mar:TTT Tet-30 (1)	Mar:TTT Tet-30 (1)	Mar:TTT Tet-30 (1)		Mar:TAT Tet-5 (2)	Mar:TAT Tet-5 (2)	Mar:TAT Tet-5 (2)	Mar:TAT Tet-10 (2)	Mar:TAT Tet-10 (2)	Mar:TAT Tet-10 (2)	Mar:TAT Tet-20 (2)	Mar:TAT Tet-20 (2)	Mar:TAT Tet-20 (2)	Mar:TAT Tet-50 (2)	Mar:TAT Tet-50 (2)	Mar:TAT Tet-50 (2)		Anti:TAT Tet-5 (2)	Anti:TAT Tet-5 (2)	Anti:TAT Tet-5 (2)	Anti:TAT Tet-10 (2)	Anti:TAT Tet-10 (2)	Anti:TAT Tet-10 (2)	Anti:TAT Tet-20 (2)	Anti:TAT Tet-20 (2)	Anti:TAT Tet-20 (2)	Anti:TAT Tet-50 (2)	Anti:TAT Tet-50 (2)
Sequence	Raw Counts	Relative Fitness	Sequence	Raw Counts	Relative Fitness	Sequence	Raw Counts	Relative Fitness	Sequence	Raw Counts	Relative Fitness		Sequence	Raw Counts	Relative Fitness	Sequence	Raw Counts	Relative Fitness	Sequence	Raw Counts	Relative Fitness	Sequence	Raw Counts	Relative Fitness		Sequence	Raw Counts	Relative Fitness	Sequence	Raw Counts	Relative Fitness	Sequence	Raw Counts	Relative Fitness	Sequence	Raw Counts	Relative Fitness		Sequence	Raw Counts	Relative Fitness	Sequence	Raw Counts	Relative Fitness	Sequence	Raw Counts	Relative Fitness	Sequence	Raw Counts
TATTCG	3355	1	TATTCG	938	1	TTTTCA	186	1	TTGTCA	8601	1		TTGCGT	5140	1	TTGACC	6559	1	TTGACC	162	1	TTGACG	489	1		TGCCCA	353	1	ATTGTC	412	1	ATTGTC	450	1	TTGTAT	2659	1		TGCCCA	14170	3.23738	TCCATT	14225	3.90904	TTGTCT	3727	1	TTGCAC	41069
CCAGGG	2276	0.67839	ACTCAG	534	0.569296	TAGCTG	150	0.806452	TTTACT	8394	0.975933		TTGATC	4451	0.865953	TTGACG	6133	0.935051	TTGACG	154	0.950617	TTGACT	318	0.650307		ATTGTC	329	0.932011	TTGTTG	217	0.526699	TTGTAT	372	0.826667	TTGTTT	2462	0.925912		TCCATT	12285	2.80672	TGCCCA	10980	3.01731	TTGCAC	1381	0.370539	TTGTCT	29311
GCTGTG	1878	0.559762	TTTTCT	499	0.531983	TTTTCT	146	0.784946	TTGTTT	7979	0.927683		TTTACA	4176	0.812451	TTTACA	6007	0.915841	TTGACT	104	0.641975	TTGACA	109	0.222904		CTGGAT	226	0.640227	TGGCGC	217	0.526699	TTGTTT	369	0.82	TTGTCA	2339	0.879654		CTGGAT	9679	2.21133	CTGGAT	5571	1.53092	TTGCCT	1143	0.306681	TTGACA	12175
ACTCAG	1637	0.487928	TTTTAT	446	0.47548	TATTCG	143	0.768817	CTTGCC	6990	0.812696		TTGATT	3965	0.771401	TTGACT	4463	0.680439	TAGACA	33	0.203704	TTGACC	96	0.196319		TTGTTT	223	0.631728	TGGCGT	202	0.490291	GTGACG	350	0.777778	TGGCGT	1810	0.680707		TTCTAA	4377	1	CTAAGC	3639	1	TTGTGT	1116	0.299437	TTGTCA	2180
GGACTG	1540	0.459016	TTTTCG	419	0.446695	TTTATT	142	0.763441	TTGCTT	6656	0.773864		TTGCAC	3514	0.683658	TTGCAT	3916	0.597042	TTTACA	28	0.17284	TATTCG	5	0.0102249		TCCATT	222	0.628895	TTGTTT	199	0.48301	TGGCGC	342	0.76	ATTGCA	1507	0.566754		CTAAGC	2734	0.624629	TTCTAA	2750	0.755702	TCCATT	929	0.249262	TCCATT	1490
ATTGTC	1524	0.454247	TGTATT	410	0.4371	TTTCAT	130	0.698925	TTGTTA	6445	0.749331		TTGCAT	2909	0.565953	TTGCCC	3530	0.538192	TTGCCC	28	0.17284	GGACGG	2	0.00408998		GGACTG	200	0.566572	TTGGCG	187	0.453883	TGGCGT	321	0.713333	TTGAGA	1489	0.559985		CCACCT	1919	0.438428	CCACCT	1761	0.483924	TTGCGC	812	0.21787	TTGACT	1310
TTAATG	1511	0.450373	TTTTCA	406	0.432836	GTGGCG	125	0.672043	TTGTAT	6004	0.698058		TTGCTT	2889	0.562062	TAGACA	3336	0.508614	TTGACA	23	0.141975	GTGACG	2	0.00408998		TTGTAT	199	0.563739	TTGTAT	179	0.434466	GTGCAG	297	0.66	TTGACT	1462	0.549831		TTGTCT	1467	0.335161	CCGCAG	1685	0.463039	TTGCTT	795	0.213308	CTTGAC	1278
CGTAGC	1443	0.430104	AAATCG	401	0.427505	GTGCAG	121	0.650538	TTGTAC	5925	0.688873		TTGCGC	2487	0.483852	TGGACA	1339	0.204147	TTGCAT	13	0.0802469	TTGCCG	2	0.00408998		TGGCGT	191	0.541076	TGGCGG	175	0.424757	TTGTTG	285	0.633333	TTGCCA	1405	0.528394		TCGCAG	1397	0.319168	TCGTGC	1310	0.359989	TTTACT	750	0.201234	TTGTCG	1263
TTTTCT	1240	0.369598	TTTATT	399	0.425373	GTGCAT	120	0.645161	TTTGCA	5598	0.650855		TTGCCA	2121	0.412646	TTGACA	588	0.0896478	TGGACA	7	0.0432099	TTGCCT	2	0.00408998		ACTAGC	183	0.518414	GTGCAG	172	0.417476	TTGTTA	272	0.604444	TAGACG	1225	0.4607		TCGTGC	1386	0.316655	CGCGCC	1267	0.348173	TTGTCA	742	0.199088	TGCCCA	1026
TTTTCA	1186	0.353502	TTTCTT	378	0.402985	TTCTCA	115	0.61828	CTTGTA	5383	0.625857		TTGTCA	2116	0.411673	TTGATC	586	0.0893429	TTGATC	6	0.037037	TTTCTG	1	0.00204499		GTGCAG	172	0.487252	TGGCTT	164	0.398058	TTGAGA	228	0.506667	TTGACG	1173	0.441143		TTGCAC	1358	0.310258	TCCGCT	1263	0.347073	TGCCCA	653	0.175208	CTAAGC	916
GTGGCG	1175	0.350224	TTTTGT	372	0.396588	TAGTAT	114	0.612903	TTGTCG	5278	0.61365		TTGCAG	1799	0.35	TATTCG	446	0.0679982	TTGATT	4	0.0246914	CAGAAT	1	0.00204499		TTTCCT	170	0.481586	TTTTCA	163	0.395631	TTGTGC	225	0.5	TTGATT	1144	0.430237		TTTGAG	1099	0.251085	TATATC	1254	0.3446	TTGAAT	601	0.161256	TTGCGC	896
AAATCG	1164	0.346945	ATTGTC	368	0.392324	TTAACA	112	0.602151	TTTACG	5269	0.612603		TAGACA	1754	0.341245	TTGATT	378	0.0576307	TTGATG	2	0.0123457	GGAATA	1	0.00204499		TATTCG	164	0.464589	TATTCG	162	0.393204	TAGCCC	225	0.5	TTCACG	1052	0.395637		TATATC	1025	0.234179	CCGCGC	927	0.25474	TTGCCA	577	0.154816	TTGCAT	877
GTATCG	1154	0.343964	TTTAAT	358	0.381663	ATTGCC	111	0.596774	TTGCTG	5226	0.607604		TTGACC	1740	0.338521	TTGCCA	359	0.054734	ATTACG	1	0.00617284	TTGATC	1	0.00204499		TTTCTT	161	0.456091	TAGCCC	155	0.376214	TAGCGT	225	0.5	TTGCCT	1021	0.383979		TTGACC	1018	0.232579	CACTCC	867	0.238252	TTGACA	547	0.146767	GTGCAC	620
TTTTTA	1143	0.340686	TTTCTA	356	0.379531	ATTGTC	105	0.564516	CTTTAC	5125	0.595861		TTGAAT	1711	0.332879	TTGCAC	325	0.0495502	ATGACC	1	0.00617284	TTTACG	1	0.00204499		TTTTCA	160	0.453258	TTTCCT	144	0.349515	ATTGCA	210	0.466667	TTGCAC	996	0.374577		CCGCAG	1011	0.23098	TTGTCT	827	0.22726	TTGCTC	540	0.144889	CTGGAT	560
ATATCG	1089	0.32459	CTTTAT	349	0.372068	TTTCCC	97	0.521505	ATTGCA	4958	0.576445		TTGCGA	1690	0.328794	TTGCGC	299	0.0455862	TTGCGA	1	0.00617284	AGGAAT	1	0.00204499		AGCGTC	157	0.444759	GTTGTG	142	0.34466	TTGTTC	209	0.464444	TTTGAC	982	0.369312		TCCGCT	973	0.222298	TTGCAC	792	0.217642	CTGGAT	529	0.141937	GTTGAC	382
TGTATT	1060	0.315946	TTTTGC	337	0.359275	TTTATC	94	0.505376	TTGAGA	4925	0.572608		TTGACG	1466	0.285214	TTGCGT	245	0.0373533	GCCGCC	1	0.00617284	GTCGCA	1	0.00204499		TTGTTG	156	0.441926	TAGCGT	142	0.34466	TTGGCG	204	0.453333	TTGCTT	955	0.359158		AGCAGT	892	0.203793	TTAGCC	770	0.211597	CTAAGC	526	0.141132	TTGCAA	352
TTTTTT	1048	0.31237	TGTTAT	337	0.359275	TGGCTT	93	0.5	TTGAAG	4850	0.563888		TTGCCC	1461	0.284241	ACTCAG	216	0.0329318	ACTCAG	1	0.00617284	GCAGTT	1	0.00204499		TAGCCC	154	0.436261	ATTGCA	141	0.342233	TGTACA	199	0.442222	GTGCAG	896	0.336969		CCGCGC	861	0.19671	TCGCAG	762	0.209398	TTGCTA	521	0.139791	TTGACC	345
TTTTAT	1005	0.299553	TGTTCT	328	0.34968	TTTGCC	93	0.5	GTGACG	4595	0.53424		TTGCCT	1184	0.23035	TGTATT	155	0.0236317	GCTCAT	1	0.00617284	TTAACT	1	0.00204499		TTTTCT	151	0.427762	TAGCGC	129	0.313107	TTGTGT	196	0.435556	GTTGTC	890	0.334712		TCGCTT	849	0.193968	AGCAGT	711	0.195383	TTGATA	445	0.119399	GTGTCT	342
TTTTGT	988	0.294486	TTTCAT	323	0.34435	ACTCAG	92	0.494624	TTGTGA	4522	0.525753		TGGACA	1125	0.218872	AAATCG	149	0.0227169	TGTATT	1	0.00617284	AGGACA	1	0.00204499		TTGCTT	150	0.424929	GTTGCT	127	0.308252	TTGTGG	195	0.433333	TTTCCT	872	0.327943		CTGGTA	836	0.190998	TTGACG	666	0.183017	TTGCTG	433	0.116179	TTGATC	314
TTTATT	965	0.28763	GTGCAT	315	0.335821	GTGCGG	91	0.489247	TTGTGT	4476	0.520405		TTGACT	1045	0.203307	CCTGAG	110	0.0167708	CCTGAG	1	0.00617284	GTGAGG	1	0.00204499		TTTATC	144	0.407932	TTTATT	126	0.305825	TTGTCG	191	0.424444	TTGAAC	848	0.318917		TGTCGC	770	0.17592	CTCCAG	665	0.182743	TGTCGC	407	0.109203	TTGACG	270
TAGCTG	962	0.286736	TTTGTG	312	0.332623	TTCCTT	91	0.489247	TTGTCT	4445	0.5168		TTGCGG	971	0.188911	TTGGCC	103	0.0157036	TTTCCC	1	0.00617284	GGGCGG	1	0.00204499		TTTATT	144	0.407932	TAGCGG	126	0.305825	TATACA	188	0.417778	TAGCCC	691	0.259872		TTGACG	751	0.171579	GGCGTT	647	0.177796	TTGATT	404	0.108398	CCGCGC	266
AGGGCT	953	0.284054	TTTAAG	308	0.328358	TATACG	91	0.489247	TTTTCA	4326	0.502965		TTGCTA	925	0.179961	GGACTG	99	0.0150938	GGAGAG	1	0.00617284	CCCGCT	1	0.00204499		TTTTAA	138	0.390935	TTGGCT	124	0.300971	TTGACC	186	0.413333	GTTGTG	675	0.253855		TTAGCC	743	0.169751	CTAACT	554	0.15224	TTGTGC	393	0.105447	TAGACA	254
TTTCTT	915	0.272727	TTTATC	307	0.327292	ATTGTA	91	0.489247	TTGAAT	4304	0.500407		TTGATA	915	0.178016	AGGACA	98	0.0149413	TTTACC	1	0.00617284	TTGTCT	1	0.00204499		AATGCG	136	0.385269	GTGACG	124	0.300971	TTGTCT	185	0.411111	TTGTCG	654	0.245957		CACTCC	699	0.159698	TTTGAG	546	0.150041	TTGAAA	381	0.102227	TTGTAG	239
TTTCAT	908	0.270641	GTGGTG	307	0.327292	CTTCCA	91	0.489247	TTGAGT	4203	0.488664		TATTCG	531	0.103307	GTGACC	54	0.00823296	CGGGCT	1	0.00617284	TAAGAG	1	0.00204499		AAATCG	134	0.379603	TGGTCA	123	0.298544	TTGCTT	183	0.406667	TTGAGC	634	0.238436		TTTACT	657	0.150103	TTGACA	530	0.145644	TTGCCG	372	0.0998122	TTGTGT	233
GTGCAT	895	0.266766	TTTCGT	304	0.324094	TTTCGC	88	0.473118	TTGTGC	4145	0.481921		TCGACA	329	0.0640078	TTGGCG	50	0.00762311	TGTAGT	1	0.00617284	CAGCTG	1	0.00204499		TTCTAA	133	0.376771	TTGTCG	123	0.298544	TTGTCA	179	0.397778	TTGTAA	610	0.22941		CGCGCC	656	0.149874	CTGGTA	525	0.14427	TTGCCC	365	0.097934	TGGCAC	214
GTGCAG	890	0.265276	TGGAGG	303	0.323028	TTTGTA	87	0.467742	TTGCGC	4018	0.467155		ACTCAG	259	0.0503891	GTGACG	49	0.00747065	GTGCAG	1	0.00617284	AACTCC	1	0.00204499		TTGTCA	132	0.373938	TTGTGG	121	0.293689	TTTACC	178	0.395556	CTTGAG	587	0.22076		ATGCTT	645	0.147361	TCGCTT	508	0.139599	TTGCAG	360	0.0965924	TTGCCT	158
ATCCAC	883	0.263189	ATTGTT	302	0.321962	TAGCCC	86	0.462366	TTGTTC	3897	0.453087		AAATCG	217	0.0422179	TGTTAT	41	0.00625095	TAGATA	1	0.00617284	ACTCAG	1	0.00204499		TTGGTT	129	0.365439	GTTGCC	120	0.291262	TATTCG	178	0.395556	TTGATC	586	0.220384		TTGTTT	621	0.141878	ATGCTT	478	0.131355	TTGACG	356	0.0955192	TTGGCT	148
TTTTCG	876	0.261103	TTCCTT	300	0.319829	ATTGCT	86	0.462366	TTGATT	3866	0.449483		TTGAAC	209	0.0406615	TTCAAT	40	0.00609849	AGTACG	1	0.00617284	ATTGCC	1	0.00204499		ACTCAG	124	0.351275	TTTCAT	117	0.283981	TTGCCT	175	0.388889	TTGTTG	558	0.209853		CTAACT	578	0.132054	AGAATA	443	0.121737	TTTACA	345	0.0925677	TGGTCT	146
TTTGTA	868	0.258718	TACCTT	298	0.317697	TTTCCT	86	0.462366	TTGTGG	3840	0.44646		TGTATT	196	0.0381323	TTGATA	40	0.00609849	AGGACA	1	0.00617284	CTGACC	1	0.00204499		GTGCGG	122	0.345609	TTTCCA	117	0.283981	TTGTGA	174	0.386667	GTTGCA	450	0.169237		TGGCGG	557	0.127256	CTATTT	378	0.103875	TTGTCG	341	0.0914945	GTGACA	143
CTTTTT	862	0.25693	TTCCTA	292	0.311301	GTTGTG	85	0.456989	TTTGAC	3833	0.445646		GTGACA	166	0.0322957	ATGGAT	38	0.00579357	GCGCTC	1	0.00617284	ACAAAC	1	0.00204499		GTGGCG	119	0.33711	CTTGTT	116	0.281553	TTGCTG	167	0.371111	TTGCGA	416	0.15645		TGGTCA	548	0.1252	TTGACT	369	0.101401	TTGACT	336	0.0901529	TTGCAG	138
CTTTAT	862	0.25693	TGTCGC	288	0.307036	TTCACT	85	0.456989	TGGCGC	3760	0.437158		GGACTG	156	0.0303502	GTTACA	33	0.00503125	TTGCGC	1	0.00617284	GCTACG	1	0.00204499		TTCACG	118	0.334278	TGCCCA	115	0.279126	TTGTAC	166	0.368889	TTGAAA	384	0.144415		TTGACT	482	0.110121	TGTCGC	363	0.0997527	TTGCAA	332	0.0890797	TTGCCA	113
TTTATC	847	0.252459	TTTGTT	287	0.30597	TTTAAT	85	0.456989	TTGGCG	3721	0.432624		CCTGAG	129	0.0250973	GTGCAT	33	0.00503125	TTGCTC	1	0.00617284	GGACTG	1	0.00204499		TTTAAA	116	0.328612	TGTACT	115	0.279126	TTGATT	163	0.362222	CTTGTC	384	0.144415		CGACAC	474	0.108293	TGTAGA	345	0.0948063	TTGATC	330	0.0885431	TGGACA	87
TATTTT	842	0.250969	CTTTTA	287	0.30597	TGTTCA	85	0.456989	TGTACA	3692	0.429252		TTGACA	127	0.0247082	TCAGGC	33	0.00503125	AATACT	1	0.00617284	TTGGCG	1	0.00204499		TGGCGC	116	0.328612	TGGTGC	114	0.276699	TTGAGC	163	0.362222	TTGAAT	374	0.140654		TTTTCT	454	0.103724	TGGCGG	337	0.0926079	TAGACA	323	0.0866649	TTCTAA	81
TTTAAT	838	0.249776	CTTCCA	285	0.303838	TTTCCG	85	0.456989	CTAGAC	3579	0.416114		AGGACA	106	0.0206226	TTTGCA	28	0.00426894	CATAGA	1	0.00617284	ACGAGA	1	0.00204499		TGGCGG	115	0.325779	GTGCAC	114	0.276699	TTTACT	162	0.36	TTGTCT	373	0.140278		TCCCAT	452	0.103267	CTATCG	322	0.0884858	GTGACA	264	0.0708345	TTGCGG	73
CCCTTG	831	0.24769	TTTCTC	283	0.301706	GTGCGT	84	0.451613	TCGACA	3574	0.415533		TTTACT	90	0.0175097	TTGGCT	28	0.00426894	ACGTCT	1	0.00617284	GCGAAC	1	0.00204499		TTTCGC	114	0.322946	TAGCCG	113	0.274272	TGACTG	161	0.357778	TTGACA	372	0.139902		CTCCAG	448	0.102353	GCCTGC	320	0.0879362	TCCCAT	254	0.0681513	TCGCAG	72
ATTGCC	816	0.243219	TTCCTC	282	0.30064	CTAGCG	83	0.446237	TTGGCA	3535	0.410999		TCGATC	82	0.0159533	GTGCCC	24	0.00365909	TTGCCG	1	0.00617284	GCGATT	1	0.00204499		GTGCGT	114	0.322946	TAGATT	113	0.274272	TTTGAC	160	0.355556	CTTGTA	370	0.13915		TGGCGC	442	0.100982	CTAGAT	303	0.0832646	TTGTAA	247	0.0662731	TTGTAT	65
GGGCGG	814	0.242623	GTGCTC	281	0.299574	TTTGCT	83	0.446237	TTGTAG	3500	0.406929		TCGATT	79	0.0153696	TAGGCA	24	0.00365909	CTCCCG	1	0.00617284	GTTGTG	1	0.00204499		TTGCCT	114	0.322946	GTTACA	112	0.271845	TTGAGT	155	0.344444	TTTACG	355	0.133509		TTTTCA	432	0.0986977	TCCCAT	288	0.0791426	CTTGTG	238	0.0638583	TTGTTT	60
TTCTTT	812	0.242027	GGACTG	279	0.297441	TAGTCT	82	0.44086	GTTGCG	3448	0.400884		TCGCGT	78	0.0151751	ACATCT	23	0.00350663	TATCTG	1	0.00617284	ATGACG	1	0.00204499		TTTTAT	114	0.322946	TATACG	111	0.269417	TGGCGG	155	0.344444	TTTACT	339	0.127492		TTGTCG	432	0.0986977	TTTTCT	286	0.078593	TTGTAT	229	0.0614435	TTGAAA	58
TACCTT	811	0.241729	GTGCTT	277	0.295309	GTTACA	82	0.44086	TTGCTC	3410	0.396466		TCTACA	72	0.0140078	TTGCCT	22	0.00335417	TAGCCA	1	0.00617284	ATGACT	1	0.00204499		ATTGCA	113	0.320113	CTTGTC	111	0.269417	TTTTCA	153	0.34	GTGACG	333	0.125235		GTAGCT	421	0.0961846	AGGACG	279	0.0766694	TTGTTT	223	0.0598336	TTGAAC	54
TTCCTT	810	0.241431	TAGTAT	277	0.295309	TTCCAT	82	0.44086	TTTACC	3384	0.393443		TTGCTC	72	0.0140078	GTGGCC	22	0.00335417	TTAACC	1	0.00617284	TTATCT	1	0.00204499		TTTTAC	112	0.31728	TTGTTC	111	0.269417	TAGACC	148	0.328889	TGGACA	330	0.124107		GGCGTT	414	0.0945853	TTGTTT	272	0.0747458	TTGCAT	218	0.0584921	TTGCTC	54
TTTTGC	800	0.23845	TTTGTC	276	0.294243	TTTCAC	81	0.435484	TTGTCC	3383	0.393326		ATGGAT	57	0.0110895	GTGACT	20	0.00304925	CTTGTA	1	0.00617284	CAGCGC	1	0.00204499		GTTGTC	112	0.31728	TTCACA	110	0.26699	TTGTCC	145	0.322222	TTGCAG	315	0.118466		TTGCTG	405	0.0925291	TTTACT	271	0.074471	TTGCGG	218	0.0584921	TTGTAC	51
TTTCTA	797	0.237556	GTGTTT	274	0.292111	TTTGAT	81	0.435484	GTGCAG	3374	0.39228		TTCAAT	57	0.0110895	TTGCCG	18	0.00274432	AGAGGT	1	0.00617284	GACACT	1	0.00204499		TTGAGA	112	0.31728	GTGCAT	110	0.26699	TGGCAA	144	0.32	CTTGAT	313	0.117713		TTGACA	395	0.0902445	TCGGAG	264	0.0725474	TCGACA	214	0.0574188	ACTGTG	49
TGTCGC	795	0.23696	TTCAAT	273	0.291045	TGGTGT	78	0.419355	TAGACT	3340	0.388327		TCGCAC	57	0.0110895	TAGACC	18	0.00274432	TTGGCG	1	0.00617284	ATTTGG	1	0.00204499		TTTAAT	111	0.314448	TTGTTA	109	0.264563	TTGCTC	144	0.32	TTGCAT	302	0.113577		TGTAGA	394	0.090016	TTTTCA	259	0.0711734	CTTGCA	208	0.055809	CCACCT	48
TTTTTG	789	0.235171	TGGTGG	271	0.288913	TGTACT	78	0.419355	TTGCGT	3297	0.383328		TCGCGC	54	0.0105058	TTTCCA	18	0.00274432	CATACG	1	0.00617284	TGCTAG	1	0.00204499		ATTGCC	109	0.308782	TTGAGA	109	0.264563	TTGCCC	140	0.311111	GTTGAC	290	0.109064		CTATCG	394	0.090016	TTCGCA	259	0.0711734	TTGATG	208	0.055809	TCGTGC	47
CTTCCA	762	0.227124	CTACAC	269	0.28678	TGGCGC	77	0.413978	TTGCGA	3278	0.381118		TGTTAT	52	0.0101167	GAGACA	16	0.0024394	GGGGAC	0	0	GTACTA	0	0		TTGATT	109	0.308782	TCCATT	109	0.264563	TAGCGC	138	0.306667	TAGACT	247	0.0928921		TATACA	377	0.0861321	TTTATT	255	0.0700742	TTGCGT	195	0.0523209	TCGGAG	42
TTTCGT	761	0.226826	TAGCTG	268	0.285714	TGGCCT	76	0.408602	TAGACG	3252	0.378096		GTGCGT	48	0.00933852	TTGCTT	14	0.00213447	CCCACA	0	0	GGGGGG	0	0		GTTGTG	109	0.308782	TTGGCC	108	0.262136	TTTGCA	137	0.304444	TGGACG	245	0.0921399		TTGTTA	370	0.0845328	GTAGCT	246	0.067601	TGGTCA	191	0.0512477	CCGCAG	42
TTTTTC	759	0.22623	ATTGCC	262	0.279318	CTTGGC	76	0.408602	TTGCGG	3223	0.374724		TCGCCA	44	0.00856031	TTTACC	14	0.00213447	GGGGAG	0	0	GGTCGT	0	0		TTTATA	108	0.305949	GTTGTC	108	0.262136	TTGACT	137	0.304444	TTGTGC	237	0.0891313		TTGTCC	366	0.0836189	CGACAC	245	0.0673262	TTGAAG	189	0.050711	GTTGAA	40
TTATCA	758	0.225931	GTGCGG	262	0.279318	TGGCTC	75	0.403226	TAGATT	3160	0.367399		TAGACG	43	0.00836576	TTGCAG	13	0.00198201	GGTGTT	0	0	GGGTCG	0	0		TGGCTT	108	0.305949	TAGTAT	108	0.262136	CTTGTA	135	0.3	ATGGAT	233	0.0876269		TTCGCA	365	0.0833905	TGGTCA	235	0.0645782	TTGAAC	179	0.0480279	GTGTCA	39
GTGCGG	753	0.224441	GTGGCG	262	0.279318	TAGCGT	75	0.403226	TTGCCT	3117	0.3624		TCGCTT	42	0.00817121	TTCACG	12	0.00182955	CATGGC	0	0	TCCAAG	0	0		TTGCAC	107	0.303116	TCGACG	107	0.259709	TTGTAA	133	0.295556	TATACA	232	0.0872508		TGGCAC	364	0.083162	TTTGAT	223	0.0612806	TTTACG	179	0.0480279	TCCGCT	39
TGGTGG	750	0.223547	TTTATA	261	0.278252	TTGGCG	75	0.403226	CTTGTC	3113	0.361935		TGCTAT	41	0.00797665	ACGATA	12	0.00182955	GGGCTT	0	0	GGGGGC	0	0		TAGTAT	107	0.303116	TCGACT	106	0.257282	CTTGTG	133	0.295556	TTGTAC	232	0.0872508		TTGTTC	358	0.0817912	TTCATG	222	0.0610058	TTGTGG	178	0.0477596	TTGCCC	38
TTTGTG	749	0.223249	TTTTCC	260	0.277186	ATTGAT	73	0.392473	TGGACT	3036	0.352982		TCGCGA	38	0.007393	GGGACA	12	0.00182955	ACAACA	0	0	ATTTAG	0	0		TTTGTT	107	0.303116	TGGCAC	106	0.257282	TTGAAC	132	0.293333	CTTGCG	231	0.0868748		TTGTGT	358	0.0817912	ATTGTC	217	0.0596318	TTGACC	165	0.0442715	TATATC	37
GTGGTG	747	0.222653	TTTCCG	258	0.275053	TTCACG	73	0.392473	GTTGCC	3016	0.350657		TCGACC	37	0.00719844	TTATGT	12	0.00182955	GCATAT	0	0	GGGTAC	0	0		TTTTTT	106	0.300283	TTTGCT	106	0.257282	CTTGTT	132	0.293333	TTGCTG	208	0.0782249		CTTGTA	346	0.0790496	TGGCGC	215	0.0590822	CCGCGC	142	0.0381003	TTGCTA	37
CCGACG	746	0.222355	TTTTTT	258	0.275053	ATAGAC	72	0.387097	GTTGAT	3015	0.350541		TCGCAT	36	0.00700389	CGGCCG	12	0.00182955	GGTTAC	0	0	GAAAAT	0	0		TTGCCA	105	0.29745	TAGCTG	106	0.257282	TAGACT	131	0.291111	CTTGCA	201	0.0755923		TTTGAT	346	0.0790496	TTGTCG	207	0.0568838	TTGTAG	137	0.0367588	GTGCGC	35
TGTTTT	742	0.221162	TTTGTA	257	0.273987	TTCCCC	71	0.38172	CTTGCT	2975	0.34589		AATCAG	36	0.00700389	TGCTAT	11	0.00167708	GGTTAG	0	0	GGGGTG	0	0		TTTGCT	105	0.29745	TCGCGC	105	0.254854	TTTACG	131	0.291111	TTGTGT	196	0.0737119		CTAGAT	346	0.0790496	TTATGC	203	0.0557846	TAGACG	126	0.0338074	CGCGCC	34
ATGGAT	741	0.220864	TTCTCA	257	0.273987	TAGATG	70	0.376344	TAGCCC	2946	0.342518		TCGTCA	36	0.00700389	GTTGCA	11	0.00167708	GGTTAT	0	0	GGGGTT	0	0		TTTCAT	104	0.294618	TTCCAT	104	0.252427	CTTGTC	131	0.291111	GTGACA	193	0.0725837		TAGCGT	340	0.0776788	TGGCAC	197	0.0541358	TAGCCA	125	0.033539	TTGCTT	33
GGCTCG	741	0.220864	GTGCAG	256	0.272921	CTGGCG	70	0.376344	TTGAGG	2943	0.34217		GTGCGC	33	0.00642023	TTGAGC	10	0.00152462	AGGTGA	0	0	CTGTCA	0	0		TATCTT	104	0.294618	TATACT	104	0.252427	TTGACG	130	0.288889	TAGCGC	188	0.0707033		TTTATT	335	0.0765364	TTTCCT	195	0.0535862	GTTGAC	115	0.0308559	TTGATT	30
TGGAGG	730	0.217586	CTGGTG	256	0.272921	GTGCGA	70	0.376344	CTTGAG	2898	0.336938		TCGCCC	33	0.00642023	TAGCCA	10	0.00152462	GGTGCT	0	0	GCGAGA	0	0		TGTGGG	104	0.294618	GTGCGC	104	0.252427	TAGCTG	130	0.288889	TTGCTC	186	0.0699511		GCCTGC	334	0.076308	CTCGTC	191	0.0524869	TTGTAC	113	0.0303193	TTGGCA	29
TTTCCG	726	0.216393	ATGGAT	255	0.271855	TATACT	70	0.376344	TTGAAC	2753	0.320079		TCTTCG	30	0.00583658	TTGCAA	10	0.00152462	GGTGGT	0	0	GGGGGT	0	0		TGGTGG	103	0.291785	TTTATC	103	0.25	TTGTAG	129	0.286667	TTGCGG	185	0.069575		CTTGTG	333	0.0760795	GATCAC	190	0.0522121	TGGACG	113	0.0303193	TTTACT	29
TGTTCT	726	0.216393	TGACGG	254	0.270789	TGGTTT	70	0.376344	TTGCCC	2697	0.313568		TCGCAG	26	0.00505837	GCTGTC	10	0.00152462	ACCTAG	0	0	GGGTAG	0	0		TTTAAC	103	0.291785	TTTCAC	103	0.25	TCGACT	127	0.282222	TAGTTC	172	0.064686		AGGACG	331	0.0756226	TTGGGT	181	0.0497389	CTTGCG	112	0.030051	CACTCC	28
GACATC	721	0.214903	TCGCTT	254	0.270789	TTTCGT	70	0.376344	GTGACA	2693	0.313103		GTGCAC	26	0.00505837	TTCACC	10	0.00152462	GGGGCT	0	0	GGGGTC	0	0		GTGACG	103	0.291785	TTGCTT	103	0.25	GTTGCT	126	0.28	TGACAA	165	0.0620534		TGTCAT	316	0.0721956	TTGCTG	179	0.0491893	TTGTTA	111	0.0297827	TTAGCC	28
TAGTAT	720	0.214605	TTTTAC	250	0.266525	TTGTTT	69	0.370968	TATACA	2669	0.310313		GTGCTT	25	0.00486381	GTGGCG	10	0.00152462	GGGGCG	0	0	TATAGA	0	0		TTTACT	103	0.291785	TTGTCA	101	0.245146	TAGCCA	125	0.277778	TTGTCC	161	0.0605491		CTTGTC	307	0.0701394	TTATTG	176	0.0483649	TTGCGA	108	0.0289777	TTGTAA	27
CTACAC	719	0.214307	TGGTCG	249	0.265458	TTCCAG	69	0.370968	ATGACG	2639	0.306825		TCGACG	25	0.00486381	TGGGCA	9	0.00137216	GGTGCG	0	0	GGGGCT	0	0		TTGATC	103	0.291785	TTCCCT	101	0.245146	GTTGTG	122	0.271111	TTGAAG	157	0.0590448		TGGATC	302	0.068997	TGGATT	175	0.0480901	TAGACT	105	0.0281728	TTGGAC	27
ATTTCA	716	0.213413	TAGATG	247	0.263326	TGGTCG	69	0.370968	TAGACC	2582	0.300198		GTTACA	25	0.00486381	TACACA	9	0.00137216	AACAGT	0	0	GGGCCT	0	0		TATACT	102	0.288952	TGGCAA	101	0.245146	TTGCGG	120	0.266667	TTGACC	154	0.0579165		TGGTAA	297	0.0678547	TAGCTT	175	0.0480901	TTGTCC	100	0.0268312	TTGGCG	26
TTTGTT	709	0.211326	TTTGAG	247	0.263326	TTTTAC	68	0.365591	GTTGCA	2479	0.288222		TCGCCT	24	0.00466926	TTAACG	9	0.00137216	GGTGTC	0	0	GGGCCG	0	0		GTGTGC	102	0.288952	TGTACA	101	0.245146	TGGCAC	120	0.266667	TTTACA	153	0.0575404		TTGCCT	287	0.06557	TTGTGT	175	0.0480901	TGGACA	99	0.0265629	TTTACA	26
TTTAAG	707	0.21073	GTGTGC	245	0.261194	TTCCCA	67	0.360215	CTTGTG	2474	0.287641		TCGAAT	23	0.00447471	TTTACT	8	0.0012197	GGTGTG	0	0	GGGCCC	0	0		TGGTTT	102	0.288952	TTTGAA	100	0.242718	GTGACA	120	0.266667	TGTACA	153	0.0575404		TTGTTG	282	0.0644277	CTTGTA	175	0.0480901	CTTGAA	90	0.0241481	TGTCGC	26
TTCAAC	701	0.208942	TGTTCC	243	0.259062	TGGTAC	66	0.354839	CTGGAC	2445	0.284269		GTGATC	23	0.00447471	TGTACA	8	0.0012197	TAGATT	0	0	TCCCCA	0	0		CTAGCG	101	0.286119	TTGGAC	100	0.242718	TATACT	119	0.264444	TTGATG	140	0.0526514		TGGATT	282	0.0644277	TATACT	171	0.0469909	GTTGCA	83	0.0222699	CTCCAG	25
GTGTTT	699	0.208346	TTTCAC	243	0.259062	TTCCCT	66	0.354839	TTGATA	2443	0.284037		TTGCCG	23	0.00447471	GTGCCA	7	0.00106724	GGGGAT	0	0	GTACCA	0	0		TATCCT	100	0.283286	GTGCGT	99	0.240291	GTTGTC	118	0.262222	TTGTGG	139	0.0522753		TTGAGC	280	0.0639708	TTGTTG	169	0.0464413	CTTGAC	79	0.0211967	TTGTGC	24
CTTTTA	698	0.208048	ATTGTG	242	0.257996	AAATCG	66	0.354839	TTGCCG	2363	0.274735		CATGAG	21	0.0040856	TATACA	7	0.00106724	GGTGGC	0	0	CAGCGA	0	0		TTGTTC	100	0.283286	TTTGCG	99	0.240291	TTCACG	117	0.26	GTTGAT	123	0.046258		TTTGCA	277	0.0632854	TTGTTA	169	0.0464413	TTCTAA	77	0.02066	TGGTCA	24
ATTGTT	688	0.205067	TTTCGG	241	0.25693	GTTGTC	66	0.354839	GTTGTG	2333	0.271248		GTGATT	19	0.0036965	TTGTCC	7	0.00106724	GGTGGG	0	0	GGGCAC	0	0		GTGCGC	99	0.280453	TTGCCA	98	0.237864	GTTGTA	116	0.257778	TCGACA	113	0.0424972		CTATTT	268	0.0612292	TTCCCT	168	0.0461665	CTTGAT	76	0.0203917	TGGCGT	24
TTCAAT	681	0.202981	CTTTTC	239	0.254797	TGGTGC	65	0.349462	TTGATC	2249	0.261481		GTGCGA	18	0.00350195	TTTACG	7	0.00106724	GGTTCG	0	0	GGGAAC	0	0		TTTCGT	98	0.27762	TTCACG	98	0.237864	TTGATG	116	0.257778	CTTGCT	111	0.041745		ATTGTC	264	0.0603153	GTGGAC	167	0.0458917	ATTGAC	70	0.0187819	TTGCTG	23
TTCTCA	681	0.202981	TTGGTT	237	0.252665	TACCCA	65	0.349462	TTGCAG	2220	0.25811		GTGCAT	18	0.00350195	TTAACC	7	0.00106724	GGGAGT	0	0	GCAAGA	0	0		TAGCCG	98	0.27762	AATGCG	97	0.235437	TTGCCA	113	0.251111	TTGCAA	108	0.0406168		TTGAAT	263	0.0600868	CTTGTC	167	0.0458917	TTGTGA	69	0.0185135	AGCAGT	22
TGGTCG	680	0.202683	TTCATT	237	0.252665	ATTGTG	65	0.349462	GTTGTA	2188	0.254389		GTGCCA	18	0.00350195	TTATTG	6	0.000914774	GGGAGG	0	0	GCGAAT	0	0		TTGACG	98	0.27762	TTGAGC	97	0.235437	TTGGCA	112	0.248889	TTGAGT	101	0.0379842		TTGAGG	262	0.0598584	TAGCGT	164	0.0450673	TTTGAC	66	0.0177086	CTTGTG	22
TAGATG	680	0.202683	TTTTAG	233	0.248401	TTACAT	65	0.349462	CTTGTT	2164	0.251599		CGAGTC	18	0.00350195	TTGATG	6	0.000914774	GCTACC	0	0	GGCTAA	0	0		TTTCCA	98	0.27762	GTGGCG	97	0.235437	TTTACA	111	0.246667	TTCACA	99	0.037232		TGGCGT	261	0.0596299	TTCCAT	162	0.0445177	TCGCAG	63	0.0169037	TTGAAT	22
TTTTAC	676	0.20149	TTTAAC	233	0.248401	GTTGTT	64	0.344086	TTGATG	2135	0.248227		TCGACT	18	0.00350195	TTGCTC	6	0.000914774	GGGATT	0	0	GGGCAG	0	0		TTCACT	98	0.27762	TTTACC	97	0.235437	TTCACA	110	0.244444	TTGTTA	89	0.0334712		TTCAAC	261	0.0596299	TTGTCC	159	0.0436933	TTGAGC	62	0.0166354	TTTGAC	21
TTTGTC	674	0.200894	TTATCA	230	0.245203	TAGCTT	63	0.33871	TTGAGC	2041	0.237298		TAGACT	18	0.00350195	AGCGTC	6	0.000914774	AGACCA	0	0	GGGGAT	0	0		GTTTAC	98	0.27762	TAGTCA	96	0.23301	CTTGCC	109	0.242222	GTAGAC	88	0.0330951		TTCATG	260	0.0594014	GTGCGC	159	0.0436933	TGGTAA	61	0.0163671	GGCGTT	21
GTGCTT	671	0.2	TTCAAC	229	0.244136	TTCACA	63	0.33871	GTTGCT	1944	0.22602		CGGCCG	16	0.00311284	TTGAAT	6	0.000914774	GGGATC	0	0	GGGGAG	0	0		TTTTCC	97	0.274788	TCGACC	95	0.230583	TGGTCA	109	0.242222	TTGCCC	84	0.0315908		AGAATA	260	0.0594014	TTTGCT	158	0.0434185	TATACA	60	0.0160987	TCCCAT	20
CGATGC	670	0.199702	CGTGCA	229	0.244136	TCGCAC	63	0.33871	ATTGAC	1897	0.220556		TAGTTG	16	0.00311284	ATTTAT	6	0.000914774	TTGCAA	0	0	GGGGAC	0	0		CTTCCA	97	0.274788	TAGCTT	94	0.228155	TGGACT	108	0.24	TTTACC	84	0.0315908		TTGGCG	259	0.0591729	TTTGCA	158	0.0434185	TGGACT	58	0.0155621	TGGCGC	20
TTTTGA	670	0.199702	CTTTCG	229	0.244136	TGGCAC	62	0.333333	CTTGAT	1762	0.20486		TCGCGG	16	0.00311284	GTGATT	6	0.000914774	GATATA	0	0	GGGGCG	0	0		TTCCAC	97	0.274788	TGGTGT	94	0.228155	TCGACG	108	0.24	GTTGTA	72	0.0270778		TGACTT	256	0.0584875	TTGTTC	156	0.0428689	TAGACC	51	0.0136839	CTAACT	20
GTTCCT	668	0.199106	TTTCCT	228	0.24307	CTTGTT	62	0.333333	TTTACA	1744	0.202767		GTGCAG	15	0.00291829	GTGCGT	6	0.000914774	GGGAAT	0	0	GGGGCC	0	0		TTGGCG	97	0.274788	CTAGCG	94	0.228155	TGGACG	107	0.237778	TTGATA	69	0.0259496		TATACT	254	0.0580306	CTTGTG	156	0.0428689	CCGCAG	50	0.0134156	TAGACG	19
TATTCT	668	0.199106	CTTGGC	228	0.24307	TCGCGC	61	0.327957	ATTGTC	1740	0.202302		TTTGCA	15	0.00291829	GTGGCT	6	0.000914774	GTGGAG	0	0	TCATTC	0	0		TTTGAT	97	0.274788	TTGGTT	92	0.223301	TTGATA	106	0.235556	CTTGCC	64	0.0240692		TTTCCT	250	0.0571167	TGACTT	152	0.0417697	TGTACA	47	0.0126107	TTAACA	19
TTCCTC	664	0.197914	GTGCGT	228	0.24307	TATACC	61	0.327957	TTGCCA	1676	0.194861		TGGACT	14	0.00272374	GTGCGC	5	0.000762311	TGCAAA	0	0	AGTTTA	0	0		TTTCCG	97	0.274788	TGTTCA	91	0.220874	TGGCAG	106	0.235556	GTTGAA	63	0.0236931		TTGCTC	250	0.0571167	TGTACC	152	0.0417697	CCACCT	46	0.0123424	TTTACG	19
TTTCCT	661	0.197019	TTAACA	227	0.242004	GTGTAC	60	0.322581	CTTGCG	1671	0.19428		TTTACC	14	0.00272374	TTAACT	5	0.000762311	TACCGC	0	0	TACACC	0	0		TTGACT	97	0.274788	TGGTTT	91	0.220874	TTGAAG	105	0.233333	ATTGTC	61	0.022941		CTCGTC	246	0.0562029	TTCAAC	152	0.0417697	GTTGCG	46	0.0123424	CTGCAC	19
TCGCAC	660	0.196721	TCGCGG	226	0.240938	CTTTAC	60	0.322581	TTGCTA	1525	0.177305		TCGATA	14	0.00272374	GTGACA	5	0.000762311	GGGACT	0	0	GGGCGT	0	0		TGGTCT	96	0.271955	TTGTGC	91	0.220874	TTGATC	105	0.233333	GTGTTT	60	0.0225649		TAGCGC	238	0.0543751	TAGTAC	150	0.0412201	TTGGCA	45	0.0120741	TTTGAG	19
TTATCG	656	0.195529	TTTCGC	225	0.239872	TAGCAG	60	0.322581	TGGACG	1456	0.169283		TTTCCA	14	0.00272374	TTGTCG	5	0.000762311	CCACGA	0	0	TTAGGT	0	0		TTGAAT	96	0.271955	TTCACT	90	0.218447	TTGCAC	105	0.233333	TTTGCA	57	0.0214366		TGGCAA	238	0.0543751	TCGAGG	149	0.0409453	TGACAA	45	0.0120741	TTGATA	18
TGACGG	655	0.195231	TAGTTT	224	0.238806	ATGGAC	60	0.322581	TTGTTG	1402	0.163004		GAGACA	13	0.00252918	TAAACA	5	0.000762311	GGTTCC	0	0	GGGCTT	0	0		TTTGTC	96	0.271955	TTGCCT	90	0.218447	TAGATT	103	0.228889	TATTCG	52	0.0195562		TTGCTT	235	0.0536897	TGGTAA	148	0.0406705	CGCGCC	45	0.0120741	GTGTCG	18
TTCCTA	650	0.193741	TTCCGT	222	0.236674	TTTCTT	59	0.317204	GTTGTC	1307	0.151959		TTGTTT	13	0.00252918	CGAGTC	5	0.000762311	AATCGA	0	0	GGGCTG	0	0		TAGCGG	95	0.269122	GTTGTT	90	0.218447	TAGACG	103	0.228889	TTGTGA	43	0.0161715		GTGGAC	234	0.0534613	TTGGCG	147	0.0403957	TTTACC	41	0.0110008	TTTTCT	18
TTTGCT	650	0.193741	GTGCCT	222	0.236674	TAGCCG	59	0.317204	CTTGCA	1117	0.129869		TTGGCC	13	0.00252918	TGGACG	5	0.000762311	AAATCC	0	0	TTGGTA	0	0		TCGCTT	95	0.269122	CTTGTA	90	0.218447	TTTCCT	103	0.228889	GTGTCA	43	0.0161715		TTTGCT	233	0.0532328	TATACA	147	0.0403957	TCGTGC	40	0.0107325	GCCATT	18
CGTGCA	648	0.193145	TTCCAG	221	0.235608	TTGGAT	59	0.317204	TGGACA	1114	0.12952		ACGATA	13	0.00252918	TTGTCA	5	0.000762311	GGGCTC	0	0	CGTGCA	0	0		TATCGC	95	0.269122	TATCTT	90	0.218447	TTGCAT	103	0.228889	CTGGAC	42	0.0157954		TTGAGA	233	0.0532328	TGTCAT	146	0.0401209	TTGAGT	38	0.0101959	TTGAGA	17
TTTTAG	648	0.193145	GTGTCA	220	0.234542	TGGTAG	58	0.311828	TAGACA	1082	0.125799		TGCGAC	13	0.00252918	TTTATA	5	0.000762311	TATGGG	0	0	CCCGAA	0	0		TAGCGT	95	0.269122	ATGACT	90	0.218447	TTGCCG	102	0.226667	TTTGCG	41	0.0154193		TTGGGT	233	0.0532328	TGGCGT	146	0.0401209	TTGAGA	37	0.00992756	AATCGA	17
TGTTAT	648	0.193145	GTGTAT	219	0.233475	GTGGCA	58	0.311828	TAGTAT	1058	0.123009		TTATGT	13	0.00252918	GAGGCA	5	0.000762311	GGGCGT	0	0	GGTGCC	0	0		TCGCGG	94	0.266289	TAGCCA	89	0.216019	ATGGAT	101	0.224444	GTTGCG	40	0.0150432		CTTTAC	230	0.0525474	TAGTCA	140	0.0384721	TTTATC	35	0.00939093	GTGCAA	17
TGGCTC	646	0.192548	TAGAGT	219	0.233475	TTGGAC	58	0.311828	ATGACA	1030	0.119754		TTGAAG	12	0.00233463	TTCACA	5	0.000762311	GGGCGG	0	0	GGTGGG	0	0		TTTCTC	94	0.266289	TTGCGC	89	0.216019	TTGAGG	101	0.224444	TTGTTC	39	0.0146672		GTGCGC	227	0.051862	CATTAC	139	0.0381973	TTTGCA	35	0.00939093	CCTGCC	17
TCGCGC	641	0.191058	GTTGGC	218	0.232409	CTAGCA	58	0.311828	TAGCTG	929	0.108011		GTGTCA	12	0.00233463	TAGGCC	5	0.000762311	GGGCAT	0	0	GGTGGT	0	0		CTTTAT	94	0.266289	TTGTCC	89	0.216019	TTTGAA	101	0.224444	GTGTAT	37	0.013915		TTTACG	226	0.0516335	ATGCTG	138	0.0379225	TTGAGG	35	0.00939093	TTGCCG	17
TGTTAG	636	0.189568	GTTCAC	218	0.232409	TAGCTC	58	0.311828	TGGACC	910	0.105802		TAGGCA	12	0.00233463	TTGCGA	5	0.000762311	GGGCAG	0	0	CGTACC	0	0		TTGTTA	94	0.266289	TGGCCG	89	0.216019	CTGGAC	98	0.217778	TGGTAA	37	0.013915		TGACAG	224	0.0511766	TTGCCT	135	0.0370981	GTTGAA	32	0.00858599	TTGTCC	17
GTGCGT	634	0.188972	TTGGGT	218	0.232409	TGGAGC	57	0.306452	TTGACT	906	0.105337		TTGTGT	12	0.00233463	GGGGAC	4	0.000609849	GGGCAC	0	0	GGTGGC	0	0		TATTCA	93	0.263456	TTGTGA	89	0.216019	TTGCTA	98	0.217778	TGGCGC	32	0.0120346		TGGTAT	224	0.0511766	TGGATC	133	0.0365485	GTGTCT	31	0.00831768	CATTAC	16
TTTCAC	631	0.188077	ATGTAC	217	0.231343	TCGCAT	57	0.306452	TTGCAC	900	0.104639		GTGAAT	11	0.00214008	GGGGCA	4	0.000609849	CAGCCT	0	0	GGTCTG	0	0		TAGCGC	93	0.263456	TTTCGC	88	0.213592	GTTGCG	96	0.213333	GTGCAC	28	0.0105303		TTATGC	224	0.0511766	TGGTAT	133	0.0365485	GTAGCT	30	0.00804937	TTGTTA	16
GTTTTC	625	0.186289	TTCACT	217	0.231343	TTGGTT	57	0.306452	TTGCAT	779	0.0905709		GCTGTC	11	0.00214008	CCCGAG	4	0.000609849	GGGCCT	0	0	GTGGGA	0	0		TGTCGC	93	0.263456	CTTCCA	88	0.213592	ATGACA	96	0.213333	TGGCGG	27	0.0101542		TCGGAG	222	0.0507197	TGGTGC	132	0.0362737	TTTGAG	30	0.00804937	CTGTAC	16
GGGCGC	623	0.185693	TTCTCG	217	0.231343	TTGTTA	57	0.306452	CTTGGC	774	0.0899895		TTGAGC	11	0.00214008	TCTTAT	4	0.000609849	GGGCCG	0	0	GTGTGA	0	0		TTGGCC	92	0.260623	TGGGCA	88	0.213592	TTGAAT	96	0.213333	TTGGCA	27	0.0101542		ATTGCA	219	0.0500343	TTCCCA	132	0.0362737	CTGTAC	29	0.00778106	ATGCTT	16
TTTCGC	622	0.185395	TCGCGC	216	0.230277	CTCGAC	57	0.306452	TTGACC	583	0.0677828		TTGGTC	11	0.00214008	GTGTCG	4	0.000609849	GGGCCC	0	0	CGGACA	0	0		TATCAA	92	0.260623	TAGCAC	88	0.213592	TGGAGC	95	0.211111	TGGTAT	27	0.0101542		TTATTG	217	0.0495773	TTGTCA	131	0.0359989	TTTTCT	28	0.00751274	CTATCG	15
GTAGTT	620	0.184799	GTGCGA	216	0.230277	TTTGAG	56	0.301075	TATTCG	567	0.0659226		TCATTA	11	0.00214008	TGCTCG	4	0.000609849	TCCTCC	0	0	GGTGAG	0	0		GTGCCG	92	0.260623	TTTAAA	88	0.213592	CTTGCT	94	0.208889	TGGTTT	26	0.00977811		TTCCAT	214	0.0488919	GTACTT	131	0.0359989	TATATC	28	0.00751274	TCGACA	15
GTGCTC	618	0.184203	TACACT	214	0.228145	TTGTGA	56	0.301075	TCGACG	547	0.0635973		TCCGGA	11	0.00214008	TTGCTA	4	0.000609849	GGTAGG	0	0	GGTGAT	0	0		TTGTCG	92	0.260623	GTGGCA	88	0.213592	GTTGCC	94	0.208889	GGGCGT	26	0.00977811		GTTGCC	213	0.0486635	GTTGTC	130	0.0357241	CATTAC	27	0.00724443	ATTGCA	15
GTGTGC	616	0.183607	CTTCCT	213	0.227079	ATGACG	56	0.301075	GTAGAC	543	0.0631322		GTGGCG	11	0.00214008	CGTGTG	4	0.000609849	GGTAGC	0	0	TCTATA	0	0		GTTACA	92	0.260623	TAGGCA	88	0.213592	TGGACC	93	0.206667	TTGGTT	24	0.00902595		TTGTGC	213	0.0486635	TGGCAA	129	0.0354493	ACTGTG	27	0.00724443	TTGAGC	15
GTGCGA	607	0.180924	TTACAT	213	0.227079	TGGTAT	56	0.301075	TAGAAT	530	0.0616207		AAGGTA	10	0.00194553	TTCCAT	4	0.000609849	GGTCTC	0	0	GGTGAC	0	0		TCGCCT	92	0.260623	TATACA	88	0.213592	TGGTAT	93	0.206667	GTGCCA	24	0.00902595		TAGCTT	213	0.0486635	TAGATT	129	0.0354493	CACTCC	26	0.00697612	GTTGTC	15
CTGTCG	606	0.180626	TTACCA	213	0.227079	TTGGAG	56	0.301075	TTTCCT	499	0.0580165		TTGTAT	10	0.00194553	TTGCGG	4	0.000609849	GGTCTG	0	0	GAGTTC	0	0		TGTACT	91	0.25779	TTGATT	86	0.208738	TATACG	92	0.204444	TTGTAG	22	0.00827379		GTTGCG	211	0.0482065	CCCCCG	128	0.0351745	TGACAG	25	0.00670781	TTCATG	15
CTGGTG	605	0.180328	TCGCAC	213	0.227079	TTTCCA	56	0.301075	TCCACG	484	0.0562725		GTGACC	10	0.00194553	TTTCAT	4	0.000609849	GGTCCG	0	0	GTGGAA	0	0		GTGTCA	91	0.25779	TGGCAT	86	0.208738	GTTGAT	91	0.202222	TTTTCT	21	0.00789771		CTTGTT	210	0.0479781	TTGGCT	127	0.0348997	CTGGTA	25	0.00670781	GGGTCT	14
TGGCTT	604	0.18003	TATTCA	211	0.224947	GGACTG	56	0.301075	TTCACA	443	0.0515056		TTTACG	10	0.00194553	GTCCAC	4	0.000609849	GTAGAT	0	0	GAGACC	0	0		TGGCCT	91	0.25779	TTTTCT	85	0.206311	TAGCCG	89	0.197778	AGTGCA	21	0.00789771		TTGTCA	205	0.0468357	TGACGC	127	0.0348997	CTCCAG	24	0.0064395	CTGGTA	14
CTGTTG	603	0.179732	TATCTT	211	0.224947	GTTTAC	55	0.295699	TGGATC	405	0.0470875		TTGGCG	9	0.00175097	ATTCGT	4	0.000609849	GGTAGT	0	0	GTTGAA	0	0		CTGGCG	90	0.254958	CTTGAG	85	0.206311	TAGTCA	89	0.197778	TTGGCG	20	0.00752162		TTGTGG	204	0.0466073	ACTGTG	126	0.0346249	AGCAGT	24	0.0064395	TTGATG	14
ATTGTG	600	0.178838	TTTCAG	210	0.223881	TGACAC	55	0.295699	TTGACA	392	0.0455761		GGTTCT	9	0.00175097	CAGCGC	4	0.000609849	CTTGAT	0	0	GGTTCG	0	0		TTTCAA	90	0.254958	TGTACG	84	0.203883	TTGGCT	88	0.195556	GTGATT	20	0.00752162		TTGTAT	204	0.0466073	TTAAAA	126	0.0346249	CTTGTA	24	0.0064395	TCGCAC	14
TTAACA	596	0.177645	GTTACG	208	0.221748	TTTGCA	55	0.295699	GTGGAC	391	0.0454598		TTGAGT	9	0.00175097	TTACAT	4	0.000609849	GGTAAT	0	0	AAGCGA	0	0		TATACC	90	0.254958	GTTTAC	84	0.203883	TGGCAT	87	0.193333	TGGCAC	20	0.00752162		CTTGCT	201	0.0459219	TTGAAT	126	0.0346249	TCCGCT	23	0.00617118	AGAATA	14
GTTGGT	596	0.177645	TGTTCG	207	0.220682	TGGTGG	55	0.295699	GTGGCA	381	0.0442972		TTGGCT	9	0.00175097	TGGCCA	4	0.000609849	TCTTTA	0	0	GTGGCG	0	0		TTGCCC	89	0.252125	TTGCTG	84	0.203883	CTTGAG	87	0.193333	TAGCGT	20	0.00752162		TAGTAC	201	0.0459219	TGTACT	125	0.0343501	TAGCAT	20	0.00536625	ATCCCC	14
TGTTCC	596	0.177645	CTGGCC	207	0.220682	TACACA	55	0.295699	GTTGAC	378	0.0439484		GTGCGG	8	0.00155642	TTCCCC	4	0.000609849	ACTGCA	0	0	CGTGTA	0	0		TTCCTT	89	0.252125	TTTCCC	84	0.203883	TGGGCA	86	0.191111	TTATGT	19	0.00714554		CATTAC	199	0.0454649	GTTGCG	124	0.0340753	TGCGCT	20	0.00536625	TAGCAC	13
TTACAT	596	0.177645	TTGGTC	206	0.219616	TAGCAT	54	0.290323	GTTACA	331	0.0384839		TGGGGC	8	0.00155642	CTTACA	4	0.000609849	CCGGGA	0	0	GGTTGG	0	0		CTTGGC	89	0.252125	TGGCTA	83	0.201456	TTGCAG	85	0.188889	TGGTTC	19	0.00714554		TAGATT	197	0.045008	CTTTAC	123	0.0338005	CTTGCC	20	0.00536625	TTGAAG	13
TTTATA	596	0.177645	TTGGTG	204	0.217484	TTGAGA	54	0.290323	AAATCG	326	0.0379026		TCGCTA	8	0.00155642	TTCATT	4	0.000609849	GGTACT	0	0	GGTGTT	0	0		TTGAGC	89	0.252125	ATGCGC	83	0.201456	TCGACA	85	0.188889	TTGGAT	18	0.00676946		TTGCCG	196	0.0447795	TTTATC	120	0.0329761	TCGCTT	19	0.00509793	TTGTGG	13
ATTGCT	593	0.176751	TATTCT	204	0.217484	TTTGCG	54	0.290323	ACTCAG	309	0.0359261		GTGCTA	8	0.00155642	CTGACT	3	0.000457387	GGTACG	0	0	ACTCGT	0	0		TTTGTA	89	0.252125	TTTGAC	83	0.201456	TGGACA	85	0.188889	TGGTCA	18	0.00676946		TTCCCA	195	0.0445511	GTTGTA	120	0.0329761	TCGGAG	18	0.00482962	GGGCAC	13
TATTCA	593	0.176751	TTCACG	202	0.215352	TTTTAT	54	0.290323	ATTGCG	309	0.0359261		ACGACA	8	0.00155642	TGGACC	3	0.000457387	GGTACC	0	0	GGTGTC	0	0		GTGCAC	88	0.249292	TGGCAG	83	0.201456	TCGACC	84	0.186667	TATACT	17	0.00639338		TAGTCA	195	0.0445511	TGGTTT	117	0.0321517	GTGCGC	17	0.00456131	CATCTT	13
GTTACA	591	0.176155	TAGTGT	202	0.215352	TCGCCA	54	0.290323	TTTGAT	289	0.0336007		TTGGTT	8	0.00155642	TATTCC	3	0.000457387	GGTCCC	0	0	GGTGTG	0	0		TTTGAC	88	0.249292	GCGACA	82	0.199029	TTGCGA	84	0.186667	TGGCTT	17	0.00639338		GATCAC	194	0.0443226	TAGCGC	117	0.0321517	ATGCTT	16	0.004293	GTGCAT	13
TTCACT	590	0.175857	TATCCG	202	0.215352	TTGTTG	53	0.284946	TGGCAT	285	0.0331357		TTGTTA	8	0.00155642	CCCGGT	3	0.000457387	CCGATA	0	0	GGTTAT	0	0		ATTGCT	87	0.246459	TTTGCA	82	0.199029	TGGATC	84	0.186667	GTGAGA	17	0.00639338		TGGACC	194	0.0443226	TGGAAT	114	0.0313273	GGCGTT	16	0.004293	GTGACT	13
CTGCTT	589	0.175559	CTTGGA	201	0.214286	TTTTCG	53	0.284946	CTTCCA	275	0.031973		GCAAGG	8	0.00155642	GGGCGG	3	0.000457387	GTAGTC	0	0	ACCTCG	0	0		TTGCAT	87	0.246459	TTGTAC	81	0.196602	TAGCGG	83	0.184444	TGTATT	17	0.00639338		TGGCGA	192	0.0438657	GTAGAC	114	0.0313273	TTGTTC	15	0.00402468	TTCACG	13
TAAGAG	589	0.175559	TATCCT	199	0.212154	GTGCAC	53	0.284946	TAGCGT	265	0.0308104		TAAACA	8	0.00155642	GGGCAG	3	0.000457387	GGTCGC	0	0	GGTTAC	0	0		TTCCCT	87	0.246459	TTGAGT	81	0.196602	TTGCGT	82	0.182222	TTGCGC	17	0.00639338		GTGACG	192	0.0438657	CTTGCC	113	0.0310525	CTAACT	15	0.00402468	CTTGCG	12
TAGCCC	589	0.175559	CTGGCT	198	0.211087	GGTGAC	52	0.27957	GGCCCC	258	0.0299965		TGCTAC	8	0.00155642	GCCTTA	3	0.000457387	TCGCCA	0	0	GGTTAG	0	0		TGGTCA	87	0.246459	CTTGGC	81	0.196602	TAGCAA	81	0.18	GTGACT	16	0.0060173		CTTGAT	190	0.0434087	TTCACA	112	0.0307777	TTAGCC	14	0.00375637	GATCAC	12
TTTGAG	589	0.175559	ATGCGT	198	0.211087	TAGATT	52	0.27957	TAGCGC	256	0.029764		TTGATG	8	0.00155642	GTAAAG	3	0.000457387	AAATAA	0	0	TGAGTA	0	0		TGGTCG	87	0.246459	CTGGAT	80	0.194175	CTTTAC	81	0.18	TAGATT	16	0.0060173		TTGCGC	190	0.0434087	TTGAGA	112	0.0307777	TGACTC	13	0.00348806	AGGACG	12
TTCACG	586	0.174665	TAGTGG	198	0.211087	TGGATC	52	0.27957	TGGCAC	246	0.0286013		GTGGCC	7	0.00136187	GGCGCC	3	0.000457387	GGTCGG	0	0	CGCTGA	0	0		TGGCTC	86	0.243626	GTTGTA	80	0.194175	GTTGCA	80	0.177778	TGGCGA	15	0.00564122		GTTGTA	189	0.0431803	TGGCCC	111	0.0305029	TTGGCG	13	0.00348806	TGGCGG	12
TTACTC	585	0.174367	GTTACA	198	0.211087	TTCCGT	52	0.27957	TAGCCA	235	0.0273224		GTGACG	7	0.00136187	CACACT	3	0.000457387	GTCCGA	0	0	TACCCA	0	0		TAGTTT	86	0.243626	TTTACT	80	0.194175	TAGACA	77	0.171111	TTTCCA	15	0.00564122		TGACAC	187	0.0427233	CTTGCT	111	0.0305029	GTGCAC	13	0.00348806	TCGCTT	12
TGTTCA	584	0.174069	GTGTGT	197	0.210021	TGGTGA	51	0.274194	TTTCCG	231	0.0268573		GTACCT	7	0.00136187	CTTACC	3	0.000457387	TTGAAA	0	0	GGTAAC	0	0		TAGCTG	86	0.243626	TTTCAA	80	0.194175	TAGCAT	76	0.168889	TGGTGT	15	0.00564122		TGGAAA	187	0.0427233	TTGCTC	111	0.0305029	AATCGA	13	0.00348806	TTCGCA	12
ATTGTA	582	0.173472	TGGTTT	196	0.208955	TGGTCA	51	0.274194	ATGGAT	205	0.0238344		TTGAAA	7	0.00136187	TCTCCT	3	0.000457387	GGTATC	0	0	GGTAAG	0	0		TCGCGC	86	0.243626	TTGATC	80	0.194175	TAGTAT	76	0.168889	TTTCAC	15	0.00564122		TTCACA	187	0.0427233	GTTACA	111	0.0305029	TGGCGC	13	0.00348806	CGACAC	12
TTTAAC	582	0.173472	TATCTA	196	0.208955	ATTGCG	51	0.274194	TTTGCG	201	0.0233694		TTGTGC	7	0.00136187	TCTTTA	3	0.000457387	GGTCAT	0	0	GGTACT	0	0		TGGAGC	86	0.243626	TAGCAA	80	0.194175	TTGCGC	76	0.168889	GTGCGA	14	0.00526514		TGTACT	187	0.0427233	TCTATT	110	0.0302281	AGGACG	12	0.00321975	TTTCCT	11
GTGTCA	580	0.172876	TTTGAT	195	0.207889	TGTACA	51	0.274194	GTGACT	201	0.0233694		GCATCA	7	0.00136187	CACATC	3	0.000457387	GGTCGT	0	0	GGTGCG	0	0		TCGCAG	86	0.243626	TAGCAT	79	0.191748	TTGAAA	74	0.164444	TGGAGC	14	0.00526514		TTCCCT	186	0.0424949	CTTGTT	109	0.0299533	TTGTTG	12	0.00321975	TTGGGT	11
TCGCGG	579	0.172578	CTAGTA	195	0.207889	TAGTCA	51	0.274194	TAGCAT	176	0.0204627		TCGAAC	6	0.00116732	TAAGAC	3	0.000457387	GGTCAG	0	0	GGTACC	0	0		TTTGCG	86	0.243626	GTGCGG	79	0.191748	TGGTGT	74	0.164444	TGCCCA	14	0.00526514		TCGACG	186	0.0424949	ATTGCA	108	0.0296785	CTAGAT	12	0.00321975	GCCTGC	11
TATCTT	578	0.17228	CTGTCG	194	0.206823	GTGACC	50	0.268817	TGTTGC	173	0.0201139		TTTTGC	6	0.00116732	TGGGTG	3	0.000457387	CCACTA	0	0	GGTACG	0	0		TTGCGC	85	0.240793	CTATAC	79	0.191748	ATTGCG	74	0.164444	CTTGTT	14	0.00526514		TTGTAG	186	0.0424949	TTCCTT	108	0.0296785	TGGCGG	12	0.00321975	TTATGC	11
TTACTT	578	0.17228	TGGCTT	194	0.206823	TACCTT	50	0.268817	TGTATT	169	0.0196489		TTACTT	6	0.00116732	TCTAGT	3	0.000457387	GGGTAC	0	0	GGGTGT	0	0		TTTCCC	85	0.240793	TATACC	79	0.191748	TGTACT	73	0.162222	TCCATT	14	0.00526514		GTAGAC	184	0.0420379	TTCCAA	107	0.0294037	CTCACC	12	0.00321975	TGGACG	11
TAGAGT	577	0.171982	TGGAGC	192	0.204691	TTGTTC	50	0.268817	GTTGAG	162	0.018835		TCTATA	6	0.00116732	TGTATG	3	0.000457387	GGATGG	0	0	ACTGCT	0	0		TGGTGT	85	0.240793	TGTACC	78	0.18932	CTTGAT	73	0.162222	GTGGTG	14	0.00526514		CTTGCC	184	0.0420379	CATCTT	107	0.0294037	ATCCCC	11	0.00295144	TGACTT	11
TTTAGG	576	0.171684	TTACTT	192	0.204691	TTGGTA	49	0.263441	TTGACG	143	0.016626		TAGCCA	6	0.00116732	TAGTTG	3	0.000457387	GGGGTT	0	0	GGGTGC	0	0		TTGGCT	85	0.240793	TGGTCG	78	0.18932	CTGACA	73	0.162222	TTGGCC	14	0.00526514		TCGACT	183	0.0418095	TTGCTT	107	0.0294037	TTCGCA	11	0.00295144	TTTTCA	11
TTATAT	572	0.170492	TTCCCC	191	0.203625	TAGTCG	49	0.263441	TGGCGT	138	0.0160446		CTGCAC	6	0.00116732	GTAGTG	3	0.000457387	GGTGAT	0	0	GGGTGG	0	0		GTGTAC	85	0.240793	TTCCCA	78	0.18932	GTGCAC	73	0.162222	TGGCCA	14	0.00526514		GTTGAT	183	0.0418095	TATACG	107	0.0294037	TTTTCA	11	0.00295144	TTTATT	11
TCGCTT	571	0.170194	TTAACT	191	0.203625	TTTAAC	49	0.263441	TAGGCT	134	0.0155796		ACATCG	6	0.00116732	CACCTT	3	0.000457387	TGCCGA	0	0	GGGTTT	0	0		TGGTGC	85	0.240793	TTGCAC	78	0.18932	TGGCCA	71	0.157778	TGGCAG	14	0.00526514		TAGACC	180	0.0411241	GAGCGG	106	0.0291289	TTGGCT	10	0.00268312	CTTGCA	11
TTTGAT	571	0.170194	TTTCCC	191	0.203625	TATTCA	49	0.263441	TCGACT	131	0.0152308		CCAGAC	6	0.00116732	CGTTGT	3	0.000457387	GGGTAT	0	0	GTTGGG	0	0		CTTGTT	85	0.240793	TGGATC	77	0.186893	TAGCGA	70	0.155556	CTTGAC	14	0.00526514		TAGCAT	180	0.0411241	TTGTGC	106	0.0291289	TGGCAC	10	0.00268312	ATTGTC	10
TTCATT	570	0.169896	GTGCCG	190	0.202559	TGTACC	48	0.258065	TGGCCG	119	0.0138356		TTCTCA	6	0.00116732	GGGGTT	3	0.000457387	GGTGAG	0	0	GGGTTC	0	0		TAGTCA	84	0.23796	TGGCCA	77	0.186893	TTGGAC	69	0.153333	TTGCCG	13	0.00488906		AGACAT	179	0.0408956	AGACAT	106	0.0291289	CTTGCT	10	0.00268312	GTGCAG	10
GTTTGT	569	0.169598	TATCCC	190	0.202559	CTAGAT	48	0.258065	TAGATC	113	0.013138		CTTGAC	6	0.00116732	CTAACT	3	0.000457387	GGGTAG	0	0	GGGTTG	0	0		TCGCAA	84	0.23796	GTGACC	77	0.186893	TGGCGA	69	0.153333	GTTACG	13	0.00488906		TGTACC	177	0.0404387	GTTGCC	106	0.0291289	GTAGCG	10	0.00268312	TTTATC	10
TTCCAG	569	0.169598	TGGTCC	190	0.202559	TAGCGA	48	0.258065	TTTGCT	111	0.0129055		GTGACT	6	0.00116732	CTGCCC	3	0.000457387	GGGGGG	0	0	GGTAGC	0	0		TATACG	84	0.23796	CTGGCG	76	0.184466	GGACTG	68	0.151111	GTGATC	13	0.00488906		TTGGCT	177	0.0404387	TAGCAG	105	0.0288541	TGGACC	10	0.00268312	TGGACT	10
CTTGGC	569	0.169598	GGACAC	190	0.202559	ATTGAG	48	0.258065	CCTGAG	109	0.0126729		TTCCTT	6	0.00116732	CGACCA	3	0.000457387	CCTGGA	0	0	GGTCCC	0	0		TGTTCA	84	0.23796	ATTGCG	76	0.184466	TGTACG	68	0.151111	GTGCTT	13	0.00488906		TGGTGC	176	0.0402102	TTGAGC	105	0.0288541	TGGCGT	9	0.00241481	TTGCGT	9
TTGGTC	568	0.1693	ATTTAC	189	0.201493	GTAGCG	48	0.258065	CAGTCC	109	0.0126729		GTGCCT	6	0.00116732	TCTCGT	3	0.000457387	GGTGCC	0	0	GGTCCG	0	0		TTTCAC	84	0.23796	TCGCCA	76	0.184466	TGACAA	68	0.151111	TTTGAA	13	0.00488906		TTGCCC	176	0.0402102	TTGGAC	103	0.0283045	TATACT	9	0.00241481	GTAGCG	9
TTAACT	568	0.1693	ATTGTA	189	0.201493	TAGGCA	48	0.258065	TGGCCT	109	0.0126729		GCGACA	6	0.00116732	AGTATA	3	0.000457387	GACGAA	0	0	GGTCAG	0	0		TTGCGG	84	0.23796	TGGTAT	76	0.184466	CTAGAC	68	0.151111	TGGATT	13	0.00488906		GTGCAC	176	0.0402102	TGACAG	103	0.0283045	GTGCCA	9	0.00241481	TTATCT	9
CTGGCG	562	0.167511	GTGCCA	189	0.201493	TTCCAC	48	0.258065	TTTGCC	94	0.010929		TTCATC	6	0.00116732	TTGGCA	3	0.000457387	ATTATA	0	0	GGTCAT	0	0		TTACTT	82	0.232295	TAGCCT	76	0.184466	TGACAG	67	0.148889	TAGACC	13	0.00488906		CTGGAC	174	0.0397533	ATCCCC	101	0.0277549	GCCTGC	9	0.00241481	GTGGCT	9
TGTTGC	559	0.166617	TACCCG	188	0.200426	TATCCA	47	0.252688	TTGGCT	94	0.010929		AGCGTC	6	0.00116732	CATGGT	3	0.000457387	GTTTCC	0	0	GGTCGC	0	0		TAGACG	82	0.232295	TTCCAA	76	0.184466	CTTGCG	67	0.148889	TGGACT	13	0.00488906		TTGTAA	174	0.0397533	TTGTGG	100	0.0274801	CTCGTC	9	0.00241481	TTCAAC	9
CTTTTC	556	0.165723	TGTTCA	188	0.200426	CTGGAT	47	0.252688	TTTCCC	78	0.00906871		TTGGAT	6	0.00116732	ACGACT	3	0.000457387	GGGGGT	0	0	GGTCGG	0	0		TTACAT	82	0.232295	TTGTGT	75	0.182039	TTGCAA	66	0.146667	TGGCAA	12	0.00451297		TAGAAA	172	0.0392963	GTGCGG	100	0.0274801	TTTGAT	9	0.00241481	TGGTCG	9
TGTGCC	556	0.165723	TGGCTC	186	0.198294	TGGATG	47	0.252688	CGTGCA	75	0.00871992		GTGCCC	5	0.000972763	TTCTAT	3	0.000457387	GGGTGT	0	0	GGTCCT	0	0		TCGCCA	82	0.232295	TTGTCT	75	0.182039	GTGACT	65	0.144444	GTGAAC	12	0.00451297		TCGACC	172	0.0392963	TGGTCT	100	0.0274801	TGGATT	9	0.00241481	TATACA	9
TTGGCG	554	0.165127	GTAGCG	186	0.198294	TTCCCG	47	0.252688	TTTTCC	74	0.00860365		GCACAC	5	0.000972763	CGCATG	3	0.000457387	GGTCTT	0	0	TACGGA	0	0		TAGCAT	82	0.232295	CTTGTG	74	0.179612	CTTCCA	64	0.142222	GTGAAT	12	0.00451297		GTGACA	171	0.0390679	TGGCAT	99	0.0272053	CTATCG	9	0.00241481	CTGACA	9
ACTAGC	552	0.164531	TCGCCT	185	0.197228	TTTACT	47	0.252688	CTTTCC	72	0.00837112		TTTCGT	5	0.000972763	ATTTTG	3	0.000457387	GGTGAC	0	0	GGAGTA	0	0		TGGCAC	82	0.232295	TGGCCT	74	0.179612	CTGGCT	63	0.14	GTGTCG	12	0.00451297		TTTGCC	170	0.0388394	GTGCAC	99	0.0272053	ATTGTC	8	0.0021465	GTAGCT	9
TTTCTC	551	0.164232	TGTTAG	184	0.196162	TAGATC	46	0.247312	CTAGAT	71	0.00825485		TTAAAT	5	0.000972763	GCGTAT	3	0.000457387	AGGATA	0	0	GGTATC	0	0		GTTGTA	81	0.229462	TTGCGT	74	0.179612	TTGGAT	62	0.137778	GGGACA	12	0.00451297		TGACGC	170	0.0388394	TAGCAT	98	0.0269305	CTGGAC	8	0.0021465	TTTGCT	8
CTGGCT	549	0.163636	TTCCTG	184	0.196162	TGGCCC	46	0.247312	CTTGAC	69	0.00802232		GGGACA	5	0.000972763	ACTCGG	3	0.000457387	GGGTTT	0	0	AAGAAA	0	0		TGTTCT	81	0.229462	TGACTT	74	0.179612	ATGACT	61	0.135556	TTGCGT	12	0.00451297		TGGCCC	169	0.0386109	TGGCTT	98	0.0269305	TGGTCT	8	0.0021465	CTTGTA	8
CTGGCC	549	0.163636	ATTGCT	184	0.196162	GGGACA	46	0.247312	TTTTCT	64	0.007441		TGGGCA	5	0.000972763	GTCTCT	3	0.000457387	CCACAA	0	0	GGTAGT	0	0		TTCCTC	80	0.226629	TGGATT	74	0.179612	TTGGAA	61	0.135556	TGGTAC	12	0.00451297		TTGTGA	168	0.0383825	CTTCCC	97	0.0266557	AGAATA	8	0.0021465	TGGTGT	8
ATGTTT	549	0.163636	TGGTTC	182	0.19403	GTGTCA	45	0.241935	TGGAGC	61	0.0070922		TTTCCT	5	0.000972763	TGATTC	3	0.000457387	TTGTTA	0	0	GCGCAA	0	0		TTGCAG	80	0.226629	GGACTG	73	0.177184	CTTGCA	61	0.135556	TTGAGG	12	0.00451297		TTCCAA	167	0.038154	TTTGCC	97	0.0266557	TAGCGT	8	0.0021465	CGTGAC	8
GTTTTA	548	0.163338	CTAGTC	181	0.192964	TGGCAG	45	0.241935	GTGCCG	58	0.0067434		TTAATT	5	0.000972763	TTTAGA	3	0.000457387	GGGTCG	0	0	GGTCAC	0	0		CTATAC	80	0.226629	TTGCCC	73	0.177184	GTGGCG	60	0.133333	GTGAAA	12	0.00451297		TGGCAT	164	0.0374686	TCGACT	97	0.0266557	CGCCTC	8	0.0021465	TGTACA	8
TTTTCC	548	0.163338	TGTTGC	181	0.192964	TTGGTC	45	0.241935	TGTACC	56	0.00651087		GAGGCA	5	0.000972763	ATACGT	3	0.000457387	GGGTCC	0	0	GGTATG	0	0		TTGTCT	80	0.226629	TTTCTT	73	0.177184	TGGCCT	60	0.133333	TGTACT	12	0.00451297		TAGATC	162	0.0370117	CTGGAC	96	0.0263809	GTGCTT	8	0.0021465	CTTGAG	8
TTCCGT	547	0.16304	TATCAT	181	0.192964	ATGCAC	45	0.241935	TGGTTA	55	0.00639461		TTGTGG	5	0.000972763	CATTTT	3	0.000457387	AGAGAG	0	0	GGTATT	0	0		TTCCCG	79	0.223796	ATTGCC	72	0.174757	TTCCAT	60	0.133333	TGGATC	12	0.00451297		TTTACC	161	0.0367832	TTGCCG	96	0.0263809	GTGGAC	8	0.0021465	TAGCTT	8
TGGTGT	545	0.162444	TGTCCA	181	0.192964	TTTTCC	45	0.241935	TGTACT	47	0.00546448		TTCCAC	5	0.000972763	ATTGCT	3	0.000457387	GGGTGG	0	0	GGATGG	0	0		TTCTCA	79	0.223796	TAGTCG	72	0.174757	GTGCGC	60	0.133333	TCGACG	12	0.00451297		TGTACA	161	0.0367832	TTGCGC	95	0.0261061	GTGTGT	8	0.0021465	TTGTTG	8
CTAGCG	543	0.161848	CTGGTC	180	0.191898	TGGTCC	45	0.241935	TCGCCA	46	0.00534822		CGTTGT	5	0.000972763	CGTTGG	3	0.000457387	GGGTGC	0	0	GGATGC	0	0		TAGATT	78	0.220963	TGGAGC	72	0.174757	TAGAAT	59	0.131111	TTCCCT	12	0.00451297		TTAAAA	157	0.0358693	TGGCGA	95	0.0261061	TGGTGC	8	0.0021465	TATACT	8
GTAGCG	540	0.160954	TTACGC	180	0.191898	TTGTAC	44	0.236559	TTGGAT	44	0.00511568		TAGACC	5	0.000972763	GTCAGT	3	0.000457387	TGCTCA	0	0	AACCAC	0	0		GTTGTT	78	0.220963	TTTGAT	72	0.174757	TATCTT	58	0.128889	GTGCAT	12	0.00451297		CCCCCG	157	0.0358693	TTTCAT	95	0.0261061	CTATTT	7	0.00187819	TGGCCA	8
TACTTT	540	0.160954	CTTCCG	180	0.191898	GTGCGC	44	0.236559	GTTTAC	43	0.00499942		ATCGCA	5	0.000972763	TTTCCC	3	0.000457387	GGGTCT	0	0	TGTCGA	0	0		TAGTGC	78	0.220963	ATGACA	72	0.174757	TGGAAA	58	0.128889	CTGGCT	11	0.00413689		TGGAAT	157	0.0358693	TGTACG	95	0.0261061	TAGCGC	7	0.00187819	GTTGCA	8
TTGGTT	536	0.159762	CTGCAG	179	0.190832	GTGCCA	44	0.236559	TAGTCA	41	0.00476689		TTGCTG	5	0.000972763	GTGGGC	3	0.000457387	GGAGTT	0	0	GGATTG	0	0		TTTGCC	78	0.220963	TAGCAG	71	0.17233	GTGCAA	57	0.126667	TTCACT	11	0.00413689		ATGCTG	153	0.0349554	TGTACA	94	0.0258313	TGGCCC	7	0.00187819	TTTCAC	8
GTGCCG	536	0.159762	TAGTAG	179	0.190832	TTCCTA	44	0.236559	TTTTCG	40	0.00465062		TCATCA	5	0.000972763	GCACTG	3	0.000457387	GGAGTG	0	0	GGATTC	0	0		TTTGAA	78	0.220963	TGACAG	71	0.17233	TGGTTC	56	0.124444	TAGCCG	11	0.00413689		TAGCAG	152	0.034727	GGGCCG	94	0.0258313	GTGAAT	7	0.00187819	TTGCGA	8
TTCTCG	534	0.159165	TGTTAC	179	0.190832	TGGATT	44	0.236559	TGTCCA	39	0.00453436		TTATTG	5	0.000972763	GCGCCC	3	0.000457387	GGAGTC	0	0	CGAGGC	0	0		TGGTAT	78	0.220963	TGGTAA	71	0.17233	TGGAGT	56	0.124444	TAGTCT	11	0.00413689		TGGTGT	151	0.0344985	CTTGAT	94	0.0258313	TCGACG	7	0.00187819	GTGCCC	8
TATATT	533	0.158867	TTCGCA	178	0.189765	GAGACA	44	0.236559	ATTGCC	36	0.00418556		TCTATT	5	0.000972763	TTGTTT	3	0.000457387	GGATGA	0	0	GGATGT	0	0		ATGCGC	78	0.220963	TGACAC	71	0.17233	GTGCAT	56	0.124444	TCGACC	11	0.00413689		GTTGTC	149	0.0340416	GTGACG	94	0.0258313	TGGCAA	7	0.00187819	TAGCCC	7
GTGCCT	533	0.158867	TTCTAT	177	0.188699	ATGACT	44	0.236559	GTGCAT	36	0.00418556		GTTGCA	5	0.000972763	TTTTTG	3	0.000457387	GGATAT	0	0	GGATAG	0	0		TAGGCG	78	0.220963	CTTTAC	71	0.17233	GTTGAA	56	0.124444	CTGGAT	11	0.00413689		TATACG	148	0.0338131	TTGAGG	93	0.0255565	GATCAC	7	0.00187819	TGACAA	7
TATTAT	532	0.158569	TAGGCT	177	0.188699	TAGAAC	43	0.231183	TAGCCG	36	0.00418556		TTGTCT	5	0.000972763	AGTTCG	3	0.000457387	GGATAG	0	0	CCTCCA	0	0		CTGACG	77	0.21813	TGGACC	70	0.169903	GTTGAG	55	0.122222	CTAAGC	11	0.00413689		GAGCGG	147	0.0335846	CCTGCC	93	0.0255565	GTGAAA	7	0.00187819	CTGTCT	7
CGGCGG	532	0.158569	TTCCGG	177	0.188699	AGACAC	43	0.231183	TTCAAT	35	0.00406929		GTACCA	5	0.000972763	GCGCAC	3	0.000457387	GGATAC	0	0	AAGCTT	0	0		TGTCAT	77	0.21813	ATTGAT	70	0.169903	TCGTCA	55	0.122222	GTGGCG	11	0.00413689		TTTCCA	147	0.0335846	TCGCCA	93	0.0255565	GTGCCT	7	0.00187819	TAGATT	7
TTTGCC	530	0.157973	CTGGAG	176	0.187633	TCGACG	43	0.231183	TAGCCT	34	0.00395303		ACATCT	5	0.000972763	CTGCCA	3	0.000457387	CGATTC	0	0	CCAGGA	0	0		TCGCGT	77	0.21813	GTGCAA	70	0.169903	ATGCGC	54	0.12	TTGGAG	11	0.00413689		TTTCAT	147	0.0335846	TTTACG	92	0.0252817	TTCATG	7	0.00187819	CTATTT	7
GTGTGG	528	0.157377	TTCCAC	176	0.187633	GCGACA	43	0.231183	TTTTTA	33	0.00383676		TCAGGC	5	0.000972763	GTGCAC	3	0.000457387	GGAGCT	0	0	GGATCG	0	0		CTTTTC	77	0.21813	AGCGTC	70	0.169903	GCGACA	54	0.12	TCGTCA	11	0.00413689		TTGTAC	145	0.0331277	CGTTTG	92	0.0252817	GCGACA	7	0.00187819	TCGACT	7
ATTTAT	526	0.156781	TATCAG	176	0.187633	TTGGCT	43	0.231183	ATGACT	32	0.0037205		TTTATC	5	0.000972763	TTACTT	3	0.000457387	GGAGCG	0	0	GGATCC	0	0		TGGGCA	77	0.21813	TAGACC	69	0.167476	TTTGAT	54	0.12	CTTTAC	11	0.00413689		TGGCTT	144	0.0328992	TATTCA	92	0.0252817	TTGGGT	7	0.00187819	TAGACC	7
TATTAC	525	0.156483	TCGCTC	175	0.186567	TGGAAG	42	0.225806	TTGGAC	32	0.0037205		TTGGAC	4	0.00077821	CGGCTA	3	0.000457387	GTGTAA	0	0	TTAGGA	0	0		TTGGTG	77	0.21813	TGGTAC	69	0.167476	TCGCGG	54	0.12	TTTTCA	11	0.00413689		ATGACA	142	0.0324423	TGGCTA	91	0.0250069	GTTGTA	6	0.00160987	TAGCGC	7
TAGTTT	524	0.156185	GTGTTA	175	0.186567	TGTTCT	42	0.225806	TTTGTA	32	0.0037205		TTTCAC	4	0.00077821	TTACCC	3	0.000457387	ATCCTT	0	0	AAATAA	0	0		CTTTCA	77	0.21813	TTGCTC	69	0.167476	TGGATT	53	0.117778	TAGTCG	11	0.00413689		CTTGAG	141	0.0322138	TGGTGT	91	0.0250069	CCTGCC	6	0.00160987	CTTGAA	7
TGTTCG	524	0.156185	GTGAAG	174	0.185501	TGGATA	42	0.225806	TTGTAA	31	0.00360423		TTGCAA	4	0.00077821	TACGTT	3	0.000457387	GGAGGT	0	0	GGCAGG	0	0		TTCCAG	77	0.21813	TTGGCA	68	0.165049	GTTTAC	53	0.117778	GAGCCC	10	0.00376081		TTTACA	140	0.0319854	TGGCCT	91	0.0250069	ATGACA	6	0.00160987	GGCCCA	7
GTTCAC	524	0.156185	GTTTCA	174	0.185501	TGGCGG	42	0.225806	TGGCAG	31	0.00360423		CACTTA	4	0.00077821	TTTTCA	3	0.000457387	CGACAA	0	0	GGCAGC	0	0		TTTGTG	76	0.215297	TTGATG	68	0.165049	TTTTCT	53	0.117778	TGGCAT	10	0.00376081		TTGCAT	140	0.0319854	TTTTGA	91	0.0250069	TTCAAC	6	0.00160987	CTGGAC	7
GTTGGC	523	0.155887	GTAGAT	174	0.185501	GTGCTT	42	0.225806	TTTCCA	30	0.00348797		TCTTGT	4	0.00077821	TTAGCC	3	0.000457387	AAGATA	0	0	TGGGCT	0	0		TAGTAG	76	0.215297	ATGGAT	68	0.165049	TAGATC	53	0.117778	TTGGCT	10	0.00376081		TTGATA	140	0.0319854	TCGCGC	90	0.0247321	TCCTCA	6	0.00160987	TTTGAT	7
TGTCTC	523	0.155887	TCGTCA	173	0.184435	GTGCCG	41	0.22043	TTTTTT	29	0.0033717		ATGAAC	4	0.00077821	TTAATC	3	0.000457387	GCCATC	0	0	AGATCA	0	0		TAGTCT	76	0.215297	GTGTCA	68	0.165049	TTGGCC	52	0.115556	TTTCAT	10	0.00376081		TTGAGT	139	0.0317569	CCAAGA	89	0.0244573	CATCTT	6	0.00160987	TTCCCT	7
CTTTCG	523	0.155887	GGTGCA	173	0.184435	ATTGCA	41	0.22043	TTTATT	28	0.00325544		AAAATT	4	0.00077821	TGCGAC	3	0.000457387	GGATTT	0	0	GGCATG	0	0		TGTTAA	76	0.215297	TAGACG	68	0.165049	TGGTAA	52	0.115556	TAGCTG	10	0.00376081		TTTGCG	138	0.0315284	TTTCCA	89	0.0244573	GTGCTC	6	0.00160987	TTCCCA	7
TGTGTG	523	0.155887	GTGTCT	173	0.184435	GTGACG	41	0.22043	GTATCG	28	0.00325544		CCCTCT	4	0.00077821	TTCCCA	3	0.000457387	GGATTG	0	0	ATCCCA	0	0		TTGTGG	76	0.215297	TGGACT	68	0.165049	CTAGCA	50	0.111111	TCGCAC	10	0.00376081		TTAACA	136	0.0310715	TCGACC	89	0.0244573	TGTAGA	6	0.00160987	TGGTAA	7
TTCATC	521	0.155291	CTGACT	173	0.184435	TCGTCA	41	0.22043	TTTCTT	27	0.00313917		TTTTTA	4	0.00077821	TTACGG	3	0.000457387	GGATTC	0	0	GTAACA	0	0		TTTTCG	75	0.212465	GTTGAG	67	0.162621	AGGACA	50	0.111111	TAGCCA	10	0.00376081		GTTACA	136	0.0310715	TTAACA	88	0.0241825	GTGACT	6	0.00160987	TTTGCA	7
TATTGC	520	0.154993	GTTACT	172	0.183369	TGTACG	41	0.22043	GTGCCA	27	0.00313917		TATACA	4	0.00077821	CTAAGA	3	0.000457387	AGTTTG	0	0	GGCAGT	0	0		TTAACA	75	0.212465	TTGGAA	67	0.162621	GTTACA	49	0.108889	GTGCGG	10	0.00376081		CTGACA	136	0.0310715	TTTCTT	87	0.0239077	TTATTG	6	0.00160987	TCGTCT	6
TGGTCC	520	0.154993	TAGTCT	172	0.183369	TAGCTA	41	0.22043	TTATGG	26	0.0030229		TTCTAG	4	0.00077821	GTATGA	3	0.000457387	TGCTGA	0	0	GGCAAG	0	0		TTTGAG	75	0.212465	TGGTCT	67	0.162621	TGGCTT	49	0.108889	GGGACG	10	0.00376081		TCGACA	132	0.0301576	TTGTAT	87	0.0239077	GTTACT	6	0.00160987	TAGCGT	6
GTTTAT	520	0.154993	CTAGAT	169	0.180171	TTTGTG	41	0.22043	TTTTAC	26	0.0030229		TTTCTT	4	0.00077821	GCTTTA	3	0.000457387	GGCAAG	0	0	GGCAAC	0	0		CTGGTG	75	0.212465	CTGTAC	66	0.160194	TTTGCG	49	0.108889	GTTGCT	10	0.00376081		TTGAAC	131	0.0299292	TTCTCA	87	0.0239077	TGAAAT	6	0.00160987	GGGCCG	6
TATCTC	520	0.154993	CTAGCT	168	0.179104	TTTATA	40	0.215054	GTAATG	26	0.0030229		CCTACT	4	0.00077821	TTGAGT	3	0.000457387	GCATGA	0	0	TGCTCA	0	0		CTGGCC	75	0.212465	TTTTAA	66	0.160194	TTCCCA	49	0.108889	TCGACT	10	0.00376081		GTGCAA	130	0.0297007	TGGAAA	85	0.0233581	TTCACA	6	0.00160987	TTCCAA	6
TTACCA	520	0.154993	TGACTC	167	0.178038	TTGTAT	40	0.215054	TTTTTC	26	0.0030229		GTGATA	4	0.00077821	TTCATC	3	0.000457387	ACCTAA	0	0	GGATTT	0	0		GGCTCG	74	0.209632	TGGTTA	66	0.160194	TAGCTT	48	0.106667	GTTCCT	10	0.00376081		ACTGTG	130	0.0297007	TTCACG	85	0.0233581	GTTACA	6	0.00160987	GTGGAC	6
GTGGGC	520	0.154993	TTTCGA	167	0.178038	TGTATT	40	0.215054	TTTTGC	26	0.0030229		CTGCGT	4	0.00077821	TCTTCT	3	0.000457387	TCTCAA	0	0	GGCACG	0	0		TGACTT	74	0.209632	TAGTAA	66	0.160194	GAGACA	48	0.106667	GTCACG	10	0.00376081		TCGCCA	129	0.0294722	TTGTGA	85	0.0233581	TGACTT	6	0.00160987	TTACAC	6
GGGCGT	519	0.154694	GTGTCG	167	0.178038	TTTACG	40	0.215054	CTGGCC	26	0.0030229		CGGTGC	4	0.00077821	CTCCTA	3	0.000457387	GGATCG	0	0	GGCACC	0	0		TGGTTA	74	0.209632	TTGTAG	66	0.160194	TTTGCT	48	0.106667	GCGACA	10	0.00376081		GGGCCG	129	0.0294722	TTTAAA	85	0.0233581	TTTCTA	6	0.00160987	CGAAGC	6
TTCCCC	519	0.154694	TTCCGA	167	0.178038	TATCCT	39	0.209677	ATGCCG	26	0.0030229		TACTCG	4	0.00077821	GCGATA	3	0.000457387	AGGTCA	0	0	TAGGGC	0	0		ATTGTG	74	0.209632	TTCCAC	66	0.160194	TAGCAC	47	0.104444	CTGACA	10	0.00376081		CTTGCG	127	0.0290153	GCGGTG	84	0.0230833	CTTGTC	6	0.00160987	TTGTTC	6
TTTCCC	518	0.154396	TGGGCG	167	0.178038	GTTGTA	39	0.209677	GTTGAA	25	0.00290664		TTACGT	4	0.00077821	TTATCT	3	0.000457387	AGTGGA	0	0	GGCAAT	0	0		TAGTAA	74	0.209632	CTCGAC	65	0.157767	ATTGAT	47	0.104444	TAGCCT	9	0.00338473		CTAGTA	126	0.0287868	TGACGA	84	0.0230833	TTCCAT	6	0.00160987	GTTGTG	6
ATTACT	518	0.154396	TAGAGC	166	0.176972	TAGTAC	38	0.204301	GGACTG	25	0.00290664		CAGTTA	4	0.00077821	TAGACG	3	0.000457387	GGATGT	0	0	GTCCAT	0	0		TTGACC	74	0.209632	GTGACA	65	0.157767	GTGGAC	47	0.104444	GTTGCC	9	0.00338473		TCGCGC	126	0.0287868	GTGACA	84	0.0230833	TTAAAA	5	0.00134156	CGGGAT	6
CCTGAG	517	0.154098	CTGTTC	166	0.176972	TGGCGT	38	0.204301	TTGAAA	25	0.00290664		TTCCAT	4	0.00077821	AGCGCC	3	0.000457387	GGGTAA	0	0	GGACCT	0	0		TTGAAC	74	0.209632	AGGACA	64	0.15534	TGGTAC	46	0.102222	TATACG	9	0.00338473		TGACGA	125	0.0285584	TAGAAA	84	0.0230833	GTAGAC	5	0.00134156	TAGCAT	6
TGGTTT	517	0.154098	TGGTGT	166	0.176972	TGGAGT	38	0.204301	TTTGTG	25	0.00290664		GAGGAC	4	0.00077821	CTCCTC	2	0.000304925	GGATGC	0	0	GGACCG	0	0		ATTGTT	74	0.209632	CTGGAC	64	0.15534	TTCCCT	46	0.102222	GTGCCT	9	0.00338473		CTAGAC	125	0.0285584	TTTCAC	83	0.0228085	GGCCCA	5	0.00134156	TGGCAT	6
TGTTTA	517	0.154098	TTTGCC	166	0.176972	TGGTCT	38	0.204301	TTTGTC	25	0.00290664		GTTCCA	4	0.00077821	TGCAAG	2	0.000304925	TAAAGC	0	0	GGACTT	0	0		GTTGCC	73	0.206799	ATGCAC	64	0.15534	TTGGAG	45	0.1	TTGCTA	9	0.00338473		TTGCTA	125	0.0285584	CTTACT	83	0.0228085	TGGTAT	5	0.00134156	GCCGCG	6
TGCGCC	516	0.1538	CTAGCG	165	0.175906	CTTGCC	38	0.204301	GTTGTT	24	0.00279037		CGTAGC	4	0.00077821	GCACAC	2	0.000304925	GGAATT	0	0	GGACTC	0	0		ATTGTA	73	0.206799	GTGGAC	64	0.15534	ATTGCC	44	0.0977778	GTGCAA	9	0.00338473		GTTGCT	125	0.0285584	GTTGAT	83	0.0228085	TCGAGG	5	0.00134156	CTCGTC	6
ACCATT	516	0.1538	GGTGAC	165	0.175906	TGACTT	38	0.204301	TAGCTT	23	0.00267411		TTCACC	4	0.00077821	GTTCCG	2	0.000304925	GGAATG	0	0	AAAGGG	0	0		TAGTCG	73	0.206799	TGACAT	64	0.15534	TTACAG	44	0.0977778	TGGAGT	9	0.00338473		TTGCCA	125	0.0285584	TTGGCC	83	0.0228085	CGTTTG	5	0.00134156	TAGAAA	6
GTTCAG	516	0.1538	TAGCCC	165	0.175906	ATGCAT	38	0.204301	ATGTGT	22	0.00255784		CACAAC	4	0.00077821	GTTATC	2	0.000304925	GGAATC	0	0	GGACGT	0	0		TGTTAT	72	0.203966	TTGAAC	64	0.15534	GTAGAC	43	0.0955556	TTGGAA	9	0.00338473		TAGCAA	125	0.0285584	TTTGCG	82	0.0225337	TTATGC	5	0.00134156	GTTACA	6
TGTTTG	515	0.153502	TATCGC	164	0.17484	TAGCAC	38	0.204301	TGGCGG	22	0.00255784		TGGCAT	4	0.00077821	GTTGGC	2	0.000304925	TTACTA	0	0	TCGTTA	0	0		TGTATT	72	0.203966	ATTGCT	63	0.152913	GTGGCA	43	0.0955556	TAGATC	9	0.00338473		TGACAA	124	0.0283299	TAGACC	82	0.0225337	GAGCGG	5	0.00134156	ATGCAC	6
TTCATA	513	0.152906	CTTTCA	164	0.17484	GTTGCC	38	0.204301	TGGAAT	22	0.00255784		GTTCAG	4	0.00077821	CTATGG	2	0.000304925	CATTGA	0	0	TGGCAA	0	0		GTGGCA	72	0.203966	TGACTG	63	0.152913	TAGGCA	43	0.0955556	GTTACA	9	0.00338473		TTTATC	123	0.0281014	TTTCGC	82	0.0225337	TCGCAT	5	0.00134156	TTTGCC	5
CTTGGT	513	0.152906	TTTGCT	164	0.17484	CTTGAG	38	0.204301	GGCGCA	22	0.00255784		TCGCTC	4	0.00077821	CTCAGT	2	0.000304925	GGACAG	0	0	GGAATT	0	0		TTGTGC	72	0.203966	TTCCTT	63	0.152913	TATACC	42	0.0933333	GAGACG	9	0.00338473		TTGATT	122	0.027873	TAGCTA	81	0.0222589	GTGCGG	5	0.00134156	TGTAGA	5
TTATGC	512	0.152608	TACACG	162	0.172708	TGGAAC	38	0.204301	CTAGCC	22	0.00255784		TTGGCA	4	0.00077821	TAGCCT	2	0.000304925	GGACAC	0	0	GGAATG	0	0		GCGACA	72	0.203966	CTGACA	63	0.152913	TGGAAT	42	0.0933333	TGTTCA	9	0.00338473		GTTGAA	121	0.0276445	TCTCTG	80	0.0219841	GTTGCT	5	0.00134156	CTTAAC	5
TCGTAT	511	0.15231	GTGGCC	162	0.172708	CTTCAC	37	0.198925	CGTACC	21	0.00244158		TCAATT	4	0.00077821	AAGGCA	2	0.000304925	CCACCC	0	0	CACGAA	0	0		TGGTTC	72	0.203966	TGGAGT	62	0.150485	CTGGCG	42	0.0933333	TAGCAT	9	0.00338473		TTGGCC	121	0.0276445	TCGACA	80	0.0219841	TTTCAT	5	0.00134156	TGGTAT	5
TTACTG	511	0.15231	ATTGAG	162	0.172708	CTGGCA	37	0.198925	TTTCTG	20	0.00232531		ACTTCT	4	0.00077821	TATAAG	2	0.000304925	GGAACT	0	0	GCGCCG	0	0		TTTTGC	72	0.203966	ATGACG	62	0.150485	TTCCGC	42	0.0933333	GTGCGT	9	0.00338473		TGTACG	118	0.0269591	TGGCTC	80	0.0219841	GCGGTG	5	0.00134156	TCGACG	5
TCCACG	511	0.15231	GTGATG	161	0.171642	CTGACG	37	0.198925	TATACT	20	0.00232531		CAGAAG	4	0.00077821	TAGTTC	2	0.000304925	GGAACG	0	0	ATTCCA	0	0		TTCCGC	71	0.201133	TTTCGT	62	0.150485	TTTAAA	41	0.0911111	TAGTCA	9	0.00338473		TGACGG	113	0.0258168	TGGTAC	80	0.0219841	GTGTCA	5	0.00134156	GTGCGT	5
CTGCAC	511	0.15231	ATGCCA	160	0.170576	GTGCCT	36	0.193548	TATACC	20	0.00232531		TAACAT	4	0.00077821	TAGATG	2	0.000304925	GAGTAC	0	0	TATCAA	0	0		CTGGTA	71	0.201133	TTCCGC	62	0.150485	TGGAAC	41	0.0911111	ATGACA	9	0.00338473		TGGCTA	111	0.0253598	TTGTAG	79	0.0217093	TGGCTT	5	0.00134156	GGGACA	5
TTGGGT	510	0.152012	GTGGCA	160	0.170576	TAGTGC	36	0.193548	TTTTAT	20	0.00232531		TTAATC	4	0.00077821	TATCAC	2	0.000304925	CCAATA	0	0	GGAGGT	0	0		TGACGG	71	0.201133	CTGACG	62	0.150485	TAGCAG	41	0.0911111	GTGTCT	9	0.00338473		TTTGAA	110	0.0251314	TGACTC	79	0.0217093	TTTATT	5	0.00134156	TTTCTA	5
CTTCCT	509	0.151714	TTTTTA	160	0.170576	AGACAG	36	0.193548	TGGATT	20	0.00232531		TTTATT	4	0.00077821	CGGGTC	2	0.000304925	GGAAGT	0	0	ATCTCA	0	0		TTTACC	71	0.201133	TGACAA	62	0.150485	TTGACA	41	0.0911111	TTGGTG	9	0.00338473		TGGAAG	110	0.0251314	AGACTT	79	0.0217093	GTGATC	5	0.00134156	GGTGAC	5
TGGAGC	506	0.15082	CTGCAC	160	0.170576	TATCAT	36	0.193548	TGGCCC	20	0.00232531		TGGACG	4	0.00077821	AGTGTG	2	0.000304925	GGAAGG	0	0	GGAGGC	0	0		TATCCC	71	0.201133	CTAGCA	61	0.148058	TAGAAA	41	0.0911111	TTTCTT	9	0.00338473		ATGACG	110	0.0251314	CTGACA	78	0.0214345	TTGGAC	5	0.00134156	TGACGA	5
TAGGTT	505	0.150522	CTGGTT	160	0.170576	TTGAGG	36	0.193548	TATCCA	20	0.00232531		TTTATA	4	0.00077821	TAGCCG	2	0.000304925	CTCGAA	0	0	GTAGGG	0	0		GTGCAT	71	0.201133	TAGAAA	61	0.148058	GGGACA	41	0.0911111	TTTCGC	9	0.00338473		GTGCGG	108	0.0246744	TAGATC	78	0.0214345	GTTGAT	5	0.00134156	TTGAGT	5
TTCTTG	501	0.149329	TTCTCT	160	0.170576	TTCACC	36	0.193548	CTTTTC	20	0.00232531		CGTGCG	4	0.00077821	GGGGCG	2	0.000304925	GGCATA	0	0	GGAGTT	0	0		TTCCGT	70	0.1983	TTGAAG	61	0.148058	TGGCTC	41	0.0911111	TGGCTC	9	0.00338473		TTGGAC	108	0.0246744	ATGACA	76	0.0208849	GTGCTA	5	0.00134156	TTCCAC	5
TTCTAT	498	0.148435	TCGCAG	159	0.16951	TTGGTG	36	0.193548	TAGTCT	19	0.00220905		TAATTC	3	0.000583658	TAGTGT	2	0.000304925	GGACTT	0	0	GGAGTG	0	0		TTGCGT	70	0.1983	TTAACA	61	0.148058	GTGACC	40	0.0888889	TTCCAA	8	0.00300865		GTACTT	107	0.024446	TGACAC	76	0.0208849	TTCATT	5	0.00134156	GTGATC	5
GCTGCG	498	0.148435	TTCCCT	159	0.16951	TTGGCC	35	0.188172	TGGCTC	19	0.00220905		TGCAGC	3	0.000583658	TAGCTC	2	0.000304925	GGACTG	0	0	GGAGTC	0	0		TATACA	70	0.1983	TAGCTA	61	0.148058	TAGTAA	40	0.0888889	TTCCAC	8	0.00300865		CTTGAA	107	0.024446	TGGCCA	76	0.0208849	TTTTGA	5	0.00134156	GTGACC	5
TGGTAC	497	0.148137	TACTCA	158	0.168443	TTATCA	35	0.188172	ATTTCA	19	0.00220905		CTCATC	3	0.000583658	GGGCGA	2	0.000304925	GGACTC	0	0	GTCCTC	0	0		TTTCGG	70	0.1983	CTGGCA	61	0.148058	TGACAT	40	0.0888889	ATGACT	8	0.00300865		TGGTAC	107	0.024446	TCGGCG	74	0.0203353	TTTGCT	5	0.00134156	GTGTAG	5
GTGTTG	497	0.148137	CTATAC	158	0.168443	TGGCCG	35	0.188172	CTTTCT	19	0.00220905		GACACC	3	0.000583658	TATTTT	2	0.000304925	CTCTAT	0	0	GGAGAT	0	0		TTGGTC	70	0.1983	TCGCAC	60	0.145631	TGGCTA	39	0.0866667	TGACTG	8	0.00300865		TGGTCT	107	0.024446	TGACAT	74	0.0203353	TTTCCT	5	0.00134156	TCTGTT	5
TAGCGT	496	0.147839	GGGACA	158	0.168443	TATACA	35	0.188172	TTGGTT	19	0.00220905		GCCTTT	3	0.000583658	TATTTG	2	0.000304925	GGAGAT	0	0	GGAGAG	0	0		CTAGCA	70	0.1983	TGTGGG	59	0.143204	TGACGG	39	0.0866667	CTGGAG	8	0.00300865		TTCACT	105	0.023989	TGACGT	74	0.0203353	CTTGTT	4	0.00107325	CTAGAT	5
TTTCGG	496	0.147839	CTACAT	158	0.168443	CTAGCT	35	0.188172	TTTCTC	19	0.00220905		CTTACA	3	0.000583658	GCAGTG	2	0.000304925	GGTACA	0	0	GGAGAC	0	0		CTTGTC	70	0.1983	TAGCGA	59	0.143204	TTTCCA	39	0.0866667	ACTCAG	8	0.00300865		TAGCGA	105	0.023989	TAGGCA	73	0.0200605	TAGCTT	4	0.00107325	TGGATC	5
CTTACG	495	0.147541	TACACC	157	0.167377	GTTGCT	35	0.188172	CTTTGC	18	0.00209278		GCAATA	3	0.000583658	TCACAC	2	0.000304925	GGAGAC	0	0	CTTGAG	0	0		TAGTGT	70	0.1983	GTGCGA	59	0.143204	CTGGCA	39	0.0866667	TTCCGC	8	0.00300865		TTTAAA	104	0.0237606	TGGACC	73	0.0200605	TAGCTA	4	0.00107325	TGGATT	5
CTTTTG	494	0.147243	TATCGA	157	0.167377	GTAGCA	35	0.188172	TGGCGA	18	0.00209278		CGAGGC	3	0.000583658	CCTCTG	2	0.000304925	ACGCGT	0	0	GGAGCT	0	0		TGGCCG	70	0.1983	TTTATA	59	0.143204	TCGCAA	38	0.0844444	TGACAG	8	0.00300865		TAGCTA	103	0.0235321	TTTACC	72	0.0197857	GGGCCG	4	0.00107325	TGACAC	5
AGTGCA	494	0.147243	TAGTGC	157	0.167377	TGGCGA	34	0.182796	ATTGAT	18	0.00209278		GAGCCG	3	0.000583658	CGGCGG	2	0.000304925	GGACCT	0	0	GGAGCG	0	0		TTGGAG	70	0.1983	ATTGTG	59	0.143204	TAGCCT	38	0.0844444	GTTGAG	8	0.00300865		TGACAT	103	0.0235321	TTTGAA	72	0.0197857	GAGACG	4	0.00107325	GTGGCA	5
TTATCT	493	0.146945	GTTGTG	157	0.167377	TCGCTT	34	0.182796	CTTTTA	18	0.00209278		TATTCT	3	0.000583658	CGGCGT	2	0.000304925	GGACCG	0	0	GGAGCC	0	0		TTGGAC	70	0.1983	ATTGAA	59	0.143204	TTTTAA	38	0.0844444	TTCCAT	8	0.00300865		TAGCAC	102	0.0233036	TTCCAC	71	0.0195109	CTAGTA	4	0.00107325	TGTCAT	5
TATCTA	493	0.146945	TTTATG	157	0.167377	TTGAGT	34	0.182796	AGTGCA	18	0.00209278		TCACAG	3	0.000583658	TTGGTT	2	0.000304925	GGACCC	0	0	TGCCTT	0	0		TATCAT	69	0.195467	TTGAGG	59	0.143204	TTATGT	37	0.0822222	CTTCCA	8	0.00300865		CTTACT	101	0.0230752	TAGCTC	71	0.0195109	TCGCGC	4	0.00107325	GTTGTA	5
TCGTCA	492	0.146647	TTCCCG	156	0.166311	TAGATA	33	0.177419	TTCCCA	18	0.00209278		GAGCCC	3	0.000583658	TTTTGG	2	0.000304925	CTAAAC	0	0	GGCTGC	0	0		TCGCAC	69	0.195467	GAGACA	58	0.140777	CTAGCG	36	0.08	TGTACG	8	0.00300865		TTTCAA	100	0.0228467	TTTCGT	71	0.0195109	CGACAA	4	0.00107325	TTTAAC	5
GTTGGG	492	0.146647	GTACCA	155	0.165245	TTTACC	33	0.177419	GAGACA	17	0.00197651		CTAAAG	3	0.000583658	ATTCTT	2	0.000304925	GGACGT	0	0	GGCGCA	0	0		TTGCTG	69	0.195467	TGGCCC	58	0.140777	CTTGAA	35	0.0777778	TATCAA	8	0.00300865		TAGCCC	99	0.0226182	TAGCAC	70	0.0192361	TCGCCA	4	0.00107325	CTTGCC	5
ATGTAC	492	0.146647	CTTGGT	154	0.164179	TGGGCA	33	0.177419	ATTGCT	17	0.00197651		TCCAAT	3	0.000583658	GGGTTG	2	0.000304925	GGACGG	0	0	GGCTCT	0	0		ATGCAC	69	0.195467	TAGATG	58	0.140777	TGGTAG	35	0.0777778	GTGGAC	8	0.00300865		TAGCTC	99	0.0226182	TAGCGA	70	0.0192361	CTTGAG	4	0.00107325	TTAAAA	5
GTGCCA	492	0.146647	TGTACT	154	0.164179	GTGATC	33	0.177419	TCGTCA	17	0.00197651		TTAGGA	3	0.000583658	TTCGTC	2	0.000304925	GGACGC	0	0	GGCTCG	0	0		TAGCGA	69	0.195467	TATCCT	58	0.140777	TGGTGC	35	0.0777778	CTGGCA	8	0.00300865		TGTTCA	98	0.0223898	CTTTTC	70	0.0192361	TGACAT	4	0.00107325	TGGCCT	5
TACACT	491	0.146349	TTGGAC	154	0.164179	TAGAAT	33	0.177419	TTTGTT	16	0.00186025		GACGTG	3	0.000583658	GTACAT	2	0.000304925	GGCGTG	0	0	GGCTTG	0	0		TTCACC	69	0.195467	TGGAAG	58	0.140777	CTGGAT	34	0.0755556	TTTAAC	8	0.00300865		TGACTC	96	0.0219328	TAGCAA	69	0.0189613	GTGTAT	4	0.00107325	TCGACC	5
GTGGCA	491	0.146349	TAGCGT	153	0.163113	TGGAAT	33	0.177419	CTGACA	16	0.00186025		ACGCCG	3	0.000583658	TAGACT	2	0.000304925	TTCCCA	0	0	GGCTTC	0	0		TAGATG	69	0.195467	TGGACG	58	0.140777	AGTGCA	34	0.0755556	TTTGCT	7	0.00263257		TTGATG	96	0.0219328	TTCCGT	69	0.0189613	CGACAC	4	0.00107325	GTAGAC	5
TTCGTT	490	0.146051	CTTCAC	153	0.163113	CTTGTC	33	0.177419	TTTTGT	16	0.00186025		CGGGGT	3	0.000583658	CGTCTC	2	0.000304925	GCAACT	0	0	CAGTTA	0	0		TTCCAT	69	0.195467	TTGGAT	58	0.140777	GTGTCA	34	0.0755556	CTTGTG	7	0.00263257		TGGCCA	95	0.0217044	TTTCAA	69	0.0189613	TTAATT	4	0.00107325	TCTATT	5
TGGCGC	489	0.145753	TACTAT	153	0.163113	GTTGAG	32	0.172043	TCTACA	16	0.00186025		CGGGCC	3	0.000583658	TACCGT	2	0.000304925	GGCGGT	0	0	GGCTGG	0	0		TAGTCC	68	0.192635	TGGCTC	58	0.140777	GTGCCG	33	0.0733333	ATTGTA	7	0.00263257		TTGGCA	95	0.0217044	CTTGAG	69	0.0189613	TGTACG	4	0.00107325	CCCCCG	4
TACACC	488	0.145455	TGGTTG	153	0.163113	CTTGTA	32	0.172043	GTTCAG	16	0.00186025		TAGTGG	3	0.000583658	TAAGGA	2	0.000304925	GGCTAG	0	0	GGCTAC	0	0		GTGGCC	68	0.192635	TGGTGG	57	0.13835	TTTATT	33	0.0733333	GTGTTG	7	0.00263257		TATTCA	94	0.0214759	TAACAA	69	0.0189613	TGGCCA	4	0.00107325	TTCACA	4
ATGTCG	488	0.145455	CTATCA	152	0.162047	TAGTGT	31	0.166667	TTTATA	16	0.00186025		CGCTGG	3	0.000583658	ATGGGG	2	0.000304925	TCTATA	0	0	GGGCAT	0	0		TGTACA	68	0.192635	TTGACT	57	0.13835	ATTGAA	33	0.0733333	TGGGCA	7	0.00263257		ATTGCG	94	0.0214759	TGTTCA	68	0.0186865	TGGATC	4	0.00107325	TAGCCA	4
TTCTTA	487	0.145156	TTACGT	152	0.162047	TGGCAT	31	0.166667	CTAGCG	16	0.00186025		TTGTAG	3	0.000583658	ACTACT	2	0.000304925	CGATTA	0	0	GGCGTT	0	0		CCCTTG	68	0.192635	TGTTAA	57	0.13835	TTTCCG	32	0.0711111	TTTAAA	7	0.00263257		GTTGTG	93	0.0212474	CGACAA	68	0.0186865	TGGCCT	4	0.00107325	TAGCTC	4
TGTCAG	486	0.144858	TGGCCT	151	0.160981	TTGTGG	31	0.166667	TTTAGT	16	0.00186025		CACTGG	3	0.000583658	TAATTC	2	0.000304925	GGCGTT	0	0	GGCCGG	0	0		CTTTAA	68	0.192635	TTGACG	57	0.13835	TATCAA	32	0.0711111	TAGCGA	7	0.00263257		GTGCAG	92	0.021019	GTTGAG	67	0.0184117	GTGACC	4	0.00107325	TTTACC	4
GTGGAG	485	0.14456	GTGGAG	151	0.160981	CTGGTG	31	0.166667	TAGTCC	15	0.00174398		CGGAGT	3	0.000583658	GCGGGA	2	0.000304925	GGCGCG	0	0	GGCTCC	0	0		TTTTGT	67	0.189802	TAGCTC	57	0.13835	TGTACC	32	0.0711111	TAGCGG	7	0.00263257		CTTCCC	92	0.021019	ATTGCG	67	0.0184117	GTGCCG	4	0.00107325	TGGGCT	4
CTGGAG	485	0.14456	ATAGAC	151	0.160981	TGGAGG	31	0.166667	TATACG	15	0.00174398		TCTACT	3	0.000583658	TTTGTA	2	0.000304925	GGCGCC	0	0	TCACTC	0	0		GTGCCA	67	0.189802	GGGACA	57	0.13835	ATTGAC	32	0.0711111	TGACAT	7	0.00263257		GTGACT	91	0.0207905	TTTTAT	67	0.0184117	TCTATT	4	0.00107325	ATGTCT	4
TTCCAT	485	0.14456	GTTCCA	151	0.160981	CTATAC	31	0.166667	TGTACG	15	0.00174398		AGCGCT	3	0.000583658	GCGAAC	2	0.000304925	GTCCCG	0	0	GGCTAT	0	0		TTCAAA	67	0.189802	TTTCCG	57	0.13835	GTTGAC	32	0.0711111	TTCCGT	7	0.00263257		TTGAAG	91	0.0207905	ATACAA	67	0.0184117	GTGACG	4	0.00107325	CTTGAT	4
TTCGCA	484	0.144262	TCCACA	151	0.160981	ATGCAG	31	0.166667	TTTGGC	15	0.00174398		GCGCGT	3	0.000583658	ACGCCT	2	0.000304925	GGCATT	0	0	GGCTAG	0	0		GTGGTG	67	0.189802	TGGAAA	57	0.13835	TTTGTA	31	0.0688889	TTTGAT	7	0.00263257		TTTGAC	91	0.0207905	TTTTAA	66	0.0181369	TAGCGA	4	0.00107325	AGGTCG	4
GTTTGC	484	0.144262	TCGTAT	151	0.160981	TTGTCG	31	0.166667	TTTCAC	15	0.00174398		GTTGCG	3	0.000583658	TAGCAG	2	0.000304925	GAGGGA	0	0	GGGAGG	0	0		TGTACG	67	0.189802	TATCCA	56	0.135922	TCGCCA	30	0.0666667	CTAGCA	7	0.00263257		GGACAA	89	0.0203336	TAGCCC	66	0.0181369	CTTACT	4	0.00107325	TATCCT	4
TGACGC	484	0.144262	ATTGAT	150	0.159915	TGACAG	31	0.166667	TTTAAT	15	0.00174398		CAGTTC	3	0.000583658	TACGTG	2	0.000304925	GCAACA	0	0	GCGAAA	0	0		TGTACC	67	0.189802	ATGCAA	56	0.135922	TGGTTA	30	0.0666667	TGGTCG	7	0.00263257		CTTTTC	89	0.0203336	GTTGTT	66	0.0181369	TAGCAG	4	0.00107325	TGACAG	4
CTACAT	483	0.143964	GTGTTC	150	0.159915	TCGCGG	31	0.166667	TTTATC	15	0.00174398		CTACTT	3	0.000583658	TAGATA	2	0.000304925	TTTAAT	0	0	GCCGAA	0	0		TGGCAG	67	0.189802	TTCCCC	56	0.135922	TTAACA	30	0.0666667	TGGACC	7	0.00263257		TGGCCT	88	0.0201051	GTTGAA	65	0.0178621	TTTCCA	4	0.00107325	TGACCA	4
TTACTA	482	0.143666	TTCCGC	150	0.159915	TTGTAG	30	0.16129	CCCGGT	15	0.00174398		TGAATC	3	0.000583658	CGTATG	2	0.000304925	GGCGCT	0	0	GGGACT	0	0		GTGACA	67	0.189802	TTCCTC	56	0.135922	ATGCAA	30	0.0666667	AGGACA	7	0.00263257		TGGACG	87	0.0198766	GTGGCG	65	0.0178621	TGTACC	4	0.00107325	CCAAGA	4
TAGATT	482	0.143666	TGACGC	150	0.159915	CTGACT	30	0.16129	TATATT	15	0.00174398		GCACTG	3	0.000583658	TACGGC	2	0.000304925	TCAGAA	0	0	TCACAA	0	0		CTAAGC	66	0.186969	TATCGC	56	0.135922	CTGGAG	29	0.0644444	TAGACA	7	0.00263257		TTGCAG	87	0.0198766	ATGCAC	64	0.0175872	TGGTGA	4	0.00107325	TAGTCA	4
TTCAGT	482	0.143666	CTGACG	149	0.158849	TGGCTA	30	0.16129	TTATGT	14	0.00162772		AATGGA	3	0.000583658	CGTCCG	2	0.000304925	GGCTTC	0	0	GGGATC	0	0		TTGTCC	66	0.186969	TTTAAT	56	0.135922	TTTCAT	29	0.0644444	GAGACT	7	0.00263257		CGACAA	86	0.0196482	TTGAGT	64	0.0175872	TAGTAC	4	0.00107325	AGACAA	4
CTAGTC	482	0.143666	GTGTCC	149	0.158849	TCGACT	30	0.16129	TTATCT	14	0.00162772		CAGCTC	3	0.000583658	TACTTC	2	0.000304925	CTCCCC	0	0	TCATCG	0	0		TAGCTC	66	0.186969	TCGTCA	56	0.135922	TAGCTA	29	0.0644444	GTGCGC	7	0.00263257		TGACGT	86	0.0196482	TCGCAT	64	0.0175872	TTTCAA	4	0.00107325	GTTGCG	4
TTTCAG	482	0.143666	TTCACC	148	0.157783	TAGACG	29	0.155914	TTTAGA	14	0.00162772		TGGTAT	3	0.000583658	AACCGA	2	0.000304925	GGCTGT	0	0	GGGAGT	0	0		GTGCTA	66	0.186969	TTGCAT	56	0.135922	TGACAC	29	0.0644444	TGTTAA	7	0.00263257		GTTGAG	86	0.0196482	GTTGCT	64	0.0175872	TGGCGA	4	0.00107325	TAGCAA	4
TAGTGG	480	0.14307	TGGGCA	148	0.157783	ACGACA	29	0.155914	TTGCAA	14	0.00162772		CTAGTA	3	0.000583658	TTTGGG	2	0.000304925	GGGAAG	0	0	AGAAGA	0	0		TCGCAT	66	0.186969	TTTACG	55	0.133495	TTCCGT	28	0.0622222	TAGTAA	7	0.00263257		TAGACT	85	0.0194197	TTGCTA	64	0.0175872	TAGTCA	4	0.00107325	TGGACC	4
TTAATT	479	0.142772	ATGCGG	148	0.157783	TAGGCG	29	0.155914	CTAGTC	14	0.00162772		CTTTGA	3	0.000583658	TGAGGG	2	0.000304925	GGGAAC	0	0	GGGCAA	0	0		ATTGCG	65	0.184136	TATCAA	55	0.133495	AGACAA	28	0.0622222	TTTTAA	7	0.00263257		ATACAA	84	0.0191912	GTTGTG	64	0.0175872	TATACC	4	0.00107325	GTGACG	4
TTGGTG	479	0.142772	ATGCAC	148	0.157783	TTGAAT	29	0.155914	ATTACG	14	0.00162772		ACTTAG	3	0.000583658	GCTTCT	2	0.000304925	CGCCAT	0	0	TTAGCC	0	0		GTGCCT	65	0.184136	TGGAAT	55	0.133495	TTTCAA	28	0.0622222	AATGCG	7	0.00263257		TAGCCG	84	0.0191912	TTCACT	63	0.0173124	GTTGCC	4	0.00107325	TCGCGC	4
TGCTAT	478	0.142474	TATCTC	148	0.157783	TGACAT	29	0.155914	TATTCT	14	0.00162772		ATAGAT	3	0.000583658	AAGTTA	2	0.000304925	GGCTTT	0	0	AGGAGA	0	0		TCGACT	65	0.184136	GTGACT	55	0.133495	TGGTCT	27	0.06	GTGCTC	6	0.00225649		ATCCCC	84	0.0191912	GCGACA	63	0.0173124	GTGATG	4	0.00107325	ATGACA	4
TTATTT	478	0.142474	GTGTAG	148	0.157783	TTCCGC	29	0.155914	TTAGCA	14	0.00162772		ATTATT	3	0.000583658	TTGAAG	2	0.000304925	GGCTCG	0	0	TCCGAA	0	0		CTTCCC	65	0.184136	CTTGCT	55	0.133495	CTCGAC	27	0.06	GTGGAT	6	0.00225649		GTTGCA	84	0.0191912	TGGAAG	63	0.0173124	GTTGGC	4	0.00107325	TGGCCG	4
ATTCAC	478	0.142474	CTGCAT	148	0.157783	GTAGCC	29	0.155914	CTTTTT	13	0.00151145		CCAACC	3	0.000583658	AGGCCT	2	0.000304925	GGCTCC	0	0	GGGACC	0	0		GTGCGA	65	0.184136	TAGATC	54	0.131068	CTGTAC	27	0.06	GTGAGC	6	0.00225649		TTTCTA	84	0.0191912	TTACAT	63	0.0173124	TTCCAC	4	0.00107325	TTCCTT	4
CTTGGA	477	0.142176	TGCACA	147	0.156716	AGGACA	29	0.155914	TTTCTA	13	0.00151145		TTCACT	3	0.000583658	GCTTGC	2	0.000304925	CCCATC	0	0	AATGGG	0	0		TAGCTT	65	0.184136	GTTGCG	54	0.131068	TTTGCC	27	0.06	TATCCT	6	0.00225649		AGACTT	82	0.0187343	GTGCAG	63	0.0173124	TTCCCA	4	0.00107325	TCCATG	4
TATATC	477	0.142176	TAGTCG	147	0.156716	TTCCTC	28	0.150538	TATCCC	13	0.00151145		TTCATT	3	0.000583658	ATAATC	2	0.000304925	GGCTAT	0	0	AGAGTA	0	0		GGGCGC	65	0.184136	TCGCAA	54	0.131068	TTTCGC	26	0.0577778	AAATCG	6	0.00225649		ATTGAC	82	0.0187343	TCGACG	63	0.0173124	TCGACT	4	0.00107325	CTTGGC	4
TTTGGT	477	0.142176	ATGGCG	147	0.156716	CTTTAT	28	0.150538	CTGTAC	13	0.00151145		GTAGAT	3	0.000583658	GCGTCC	2	0.000304925	GGCTGG	0	0	GGCCGC	0	0		ATGACT	65	0.184136	TTTGCC	54	0.131068	TAGCTC	25	0.0555556	CTAGAC	6	0.00225649		TTGCGG	82	0.0187343	TTGTAA	63	0.0173124	TTTTAA	3	0.000804937	CTTGCT	4
CTACTT	477	0.142176	CTGCGT	147	0.156716	TTTCTA	28	0.150538	TTGGCC	13	0.00151145		GTACGT	3	0.000583658	GCCGGG	2	0.000304925	AAGCAA	0	0	GCGGGC	0	0		TGTAAT	65	0.184136	TTGGAG	54	0.131068	TGGCCG	25	0.0555556	TCGCGC	6	0.00225649		GCGACA	82	0.0187343	TTGCCC	62	0.0170376	TAGTCT	3	0.000804937	TTCTCA	4
TGGTTC	477	0.142176	TTACAG	147	0.156716	TACACT	28	0.150538	TTGGTA	13	0.00151145		GATCGG	3	0.000583658	GCTCAG	2	0.000304925	TCATCA	0	0	AAGGAA	0	0		TTCCAA	65	0.184136	TTCCAG	54	0.131068	GTGCGG	24	0.0533333	TAGCTT	6	0.00225649		TGGCAG	81	0.0185058	TTGAAC	61	0.0167628	TGGCCG	3	0.000804937	GTGCCA	4
TATCCT	476	0.141878	GTTGTT	147	0.156716	TACCAT	28	0.150538	ATGCCA	13	0.00151145		TTCTGT	3	0.000583658	AGGGTC	2	0.000304925	GGCTCT	0	0	GGCCTG	0	0		GTTACT	64	0.181303	TTACAT	54	0.131068	TACCTT	24	0.0533333	TATCTT	6	0.00225649		TTGAAA	81	0.0185058	TTGATA	61	0.0167628	TTTAAT	3	0.000804937	TAGCCG	4
TTCTTC	474	0.141282	TATATT	146	0.15565	TACCCT	28	0.150538	TAGCAC	13	0.00151145		CTGGTT	3	0.000583658	GCGTTG	2	0.000304925	GGCATG	0	0	GGCCTC	0	0		TTGTAA	64	0.181303	TAGATA	53	0.128641	ATGACG	24	0.0533333	GTGTAA	6	0.00225649		TTTCGC	81	0.0185058	TTCCCG	60	0.016488	TAGAAA	3	0.000804937	TTGGCC	4
TTCTGT	472	0.140686	TATCGT	146	0.15565	TTGCTG	28	0.150538	TTTCGC	13	0.00151145		TTACAG	3	0.000583658	CTGATC	2	0.000304925	AGTCCA	0	0	TTGTGG	0	0		CTTTTA	64	0.181303	CTAGAA	53	0.128641	TTTCTT	24	0.0533333	CTGACG	6	0.00225649		ATTGAT	81	0.0185058	GGACAG	60	0.016488	CGTGTG	3	0.000804937	TGTACT	4
TACCCA	471	0.140387	ATGGAC	146	0.15565	TATCGC	28	0.150538	GTTACG	13	0.00151145		TTACAT	3	0.000583658	GGCCTG	2	0.000304925	GATCAT	0	0	TAATAA	0	0		GTGATT	64	0.181303	GTGTAC	53	0.128641	GTGGAT	23	0.0511111	TGGTCC	6	0.00225649		TAGCGG	80	0.0182774	TGACTA	60	0.016488	TGGAGC	3	0.000804937	CTTGTC	4
TATTAG	470	0.140089	TTCATA	146	0.15565	TTGTGT	28	0.150538	TTTATG	12	0.00139519		AGCAGT	3	0.000583658	GGCCGG	2	0.000304925	GGCCAT	0	0	AGCAGA	0	0		TCGCCC	64	0.181303	TGGAAC	52	0.126214	TTTCAG	23	0.0511111	TTTATT	6	0.00225649		TAGACG	80	0.0182774	TTGTAC	60	0.016488	GTGTTT	3	0.000804937	TTATTG	4
GTTGTT	468	0.139493	TGGATG	146	0.15565	ATGACA	28	0.150538	TGGTAT	12	0.00139519		TTAACG	3	0.000583658	TTATAC	2	0.000304925	GGCCAG	0	0	GGCCAC	0	0		TTTAAG	64	0.181303	TAGAAT	52	0.126214	TTTCCC	23	0.0511111	ATTGAT	6	0.00225649		TTCTCA	80	0.0182774	CTAGAC	60	0.016488	TTGGCC	3	0.000804937	TTGTGA	4
TACTAT	468	0.139493	CTGGCG	146	0.15565	TAGTAG	28	0.150538	CTTATT	12	0.00139519		GGCGTG	3	0.000583658	GGCGTG	2	0.000304925	GGCCAC	0	0	CCCTCT	0	0		CTTGAG	64	0.181303	TGGTTC	51	0.123786	GTGCGT	22	0.0488889	TTAACA	6	0.00225649		TTCCTT	80	0.0182774	TTGGTT	60	0.016488	GTACTT	3	0.000804937	GTTGCC	3
TACCCG	467	0.139195	GTTCCT	145	0.154584	TAGCGC	28	0.150538	CTAGGC	12	0.00139519		GCCAGG	3	0.000583658	TCCATA	2	0.000304925	TAATTG	0	0	GGCATT	0	0		TATTCT	64	0.181303	TAGACT	51	0.123786	TAGATA	22	0.0488889	TTTGCC	6	0.00225649		TGGCTC	78	0.0178204	TGGCCG	59	0.0162132	ATTGCG	3	0.000804937	GTGTTT	3
GTTGTG	467	0.139195	TTGGCG	145	0.154584	TAGCCT	27	0.145161	CTTGGG	12	0.00139519		TTCACG	3	0.000583658	CGATGG	2	0.000304925	AGAACA	0	0	GTGCTA	0	0		TGGAGT	64	0.181303	TGGCGA	51	0.123786	GTTGTT	22	0.0488889	TGGAGA	6	0.00225649		TAGGCA	78	0.0178204	ATTGAT	59	0.0162132	GTGCAT	3	0.000804937	TGTGCA	3
TTTTGG	466	0.138897	TACAAC	145	0.154584	ATGCGC	27	0.145161	TTTAAC	12	0.00139519		AGCCAT	3	0.000583658	GTTTGC	2	0.000304925	GGCACG	0	0	GGCCCC	0	0		TTTGCA	64	0.181303	TTCTCA	51	0.123786	TGTTAA	22	0.0488889	GGGCAG	6	0.00225649		ATTGAA	77	0.017592	TTTCCG	59	0.0162132	TTTAAC	3	0.000804937	GTGTGT	3
ATAGAT	466	0.138897	ATGGCA	145	0.154584	TTGTCT	27	0.145161	TACGCA	11	0.00127892		CTGACG	3	0.000583658	TAAATC	2	0.000304925	GGCACC	0	0	CAAGAT	0	0		TTGGAA	64	0.181303	GTGCCG	51	0.123786	TTTCAC	22	0.0488889	TGGCTG	6	0.00225649		TGACTA	77	0.017592	GTTTAC	59	0.0162132	TCGTCA	3	0.000804937	GTTGAT	3
TATCCG	465	0.138599	TGACTG	145	0.154584	AGACAT	27	0.145161	CTGGTA	11	0.00127892		CTTTTA	3	0.000583658	GAGCAT	2	0.000304925	TACTAC	0	0	GGCCAT	0	0		ATGCAG	64	0.181303	TATTCA	51	0.123786	TTCTCT	21	0.0466667	TGGCTA	6	0.00225649		TGGCCG	77	0.017592	GGGAAT	58	0.0159384	TGGTCG	3	0.000804937	TAGCAG	3
CTTAAT	463	0.138003	TTTCCA	145	0.154584	TTGTCC	27	0.145161	ATTACA	11	0.00127892		TAATGA	3	0.000583658	GAGACC	2	0.000304925	GGCAGT	0	0	GGCGGG	0	0		TGGCCC	64	0.181303	TCGCGT	51	0.123786	TCGCGC	21	0.0466667	TGGCCT	6	0.00225649		TAGACA	76	0.0173635	GTGCAA	58	0.0159384	TGGAAT	3	0.000804937	GTTAAC	3
GTTCAT	462	0.137705	TAGTTA	145	0.154584	TTGTCA	27	0.145161	CCCGTA	11	0.00127892		TTTCCG	3	0.000583658	GGCAGG	2	0.000304925	CTACTA	0	0	GGCGGC	0	0		TGGAGG	63	0.17847	TGGTAG	50	0.121359	CTTGGC	21	0.0466667	GGACTG	6	0.00225649		TGGATA	76	0.0173635	TTGGAT	57	0.0156636	TTGGTT	3	0.000804937	TAGTCT	3
ATTTAC	462	0.137705	TTACTA	144	0.153518	TTTCAG	27	0.145161	CTTACT	11	0.00127892		TAGAGA	3	0.000583658	CTGTTA	2	0.000304925	GGCAGC	0	0	GATCAT	0	0		TAGTAC	63	0.17847	GTGGAA	50	0.121359	TTCACT	21	0.0466667	TTTAAT	6	0.00225649		TTTTGA	76	0.0173635	GGTGCT	56	0.0153888	TTTGCG	3	0.000804937	TTTCAA	3
TCGCCT	461	0.137407	TGGTGC	144	0.153518	TGGTTA	26	0.139785	CTTACG	11	0.00127892		TTTCAT	3	0.000583658	GCCCCG	2	0.000304925	AAGGGA	0	0	ACTCGA	0	0		TTACCA	63	0.17847	CTGGCT	49	0.118932	TTCCAG	21	0.0466667	TTCCTC	6	0.00225649		TTCACG	75	0.017135	GTGCGT	56	0.0153888	ATTGCA	3	0.000804937	TTACAA	3
GGGCAG	460	0.137109	TGTTTT	144	0.153518	TTGCTT	26	0.139785	TTCGCA	11	0.00127892		GTTGTA	3	0.000583658	AGTGCT	2	0.000304925	GGCCTT	0	0	GGCGTG	0	0		TCGACG	63	0.17847	TTTGTA	49	0.118932	GTGCGA	21	0.0466667	TTCCCA	6	0.00225649		TTCCCC	75	0.017135	GTGCGA	56	0.0153888	TGGTGT	3	0.000804937	TGGTGC	3
CTTTGT	460	0.137109	TATACT	144	0.153518	TGACGC	26	0.139785	TTATCA	11	0.00127892		TTTGTT	3	0.000583658	GGGCCA	2	0.000304925	GGCCTG	0	0	GGCGTC	0	0		CCAGGG	63	0.17847	TTGATA	49	0.118932	TAGGCG	21	0.0466667	TTGGAC	6	0.00225649		TCGCAT	74	0.0169066	GTGTCT	55	0.015114	AGCCTC	3	0.000804937	TTTCCC	3
TGGCCT	459	0.136811	ATGCGC	143	0.152452	TTGAAG	26	0.139785	CTGACG	11	0.00127892		TTTTAG	3	0.000583658	GCCGGC	2	0.000304925	GGCCTC	0	0	TCCCAA	0	0		GTCGAC	62	0.175637	GTGCCA	49	0.118932	TTCCTC	21	0.0466667	TTGGTA	6	0.00225649		TTGGAT	74	0.0169066	TTGATT	55	0.015114	GCCGGG	3	0.000804937	TAGATC	3
CTAGTT	459	0.136811	TGGTGA	143	0.152452	TGACTG	26	0.139785	TTTCGT	11	0.00127892		CAGCGA	3	0.000583658	GCCCGG	2	0.000304925	TAACAG	0	0	TCGAAA	0	0		ATTGAA	62	0.175637	TCGCAT	49	0.118932	ATGCAG	20	0.0444444	ATGCGC	6	0.00225649		GTGCGA	73	0.0166781	TTGGAA	55	0.015114	TTTCCG	3	0.000804937	GTTGCT	3
TTCCAC	459	0.136811	TAGCCG	142	0.151386	GTGGAT	26	0.139785	CTGGCG	11	0.00127892		TTACCA	3	0.000583658	AGTCTG	2	0.000304925	GGCGAT	0	0	GGCGAG	0	0		TTGCTC	62	0.175637	ATAGAC	49	0.118932	TGACTT	20	0.0444444	TTCCAG	6	0.00225649		TGGTTT	73	0.0166781	TAGCCG	55	0.015114	GTGTGC	3	0.000804937	TCGGCG	3
TGGTAG	458	0.136513	TTACCT	142	0.151386	CTAGAC	25	0.134409	TTTTGA	11	0.00127892		GTAAGT	3	0.000583658	AGCACA	2	0.000304925	GGCGAG	0	0	GGCGAC	0	0		TGGCTG	62	0.175637	ATTGTA	48	0.116505	TGTGCA	20	0.0444444	ATGCAA	6	0.00225649		TTCCAC	73	0.0166781	TAGTCG	55	0.015114	GTTTAC	3	0.000804937	GTTGTT	3
CTGGTT	457	0.136215	CAGACT	142	0.151386	GAGACG	25	0.134409	ATGCCT	11	0.00127892		TTGTCC	3	0.000583658	AGTGTC	2	0.000304925	TTAAAA	0	0	TAGTAA	0	0		TGGCAT	62	0.175637	TTGACC	48	0.116505	GTGCCA	20	0.0444444	TACACC	6	0.00225649		TCGAGG	72	0.0164496	GGACAA	54	0.0148392	CTAGCG	3	0.000804937	TCTCTG	3
TTCCCT	457	0.136215	TTCTCC	142	0.151386	TTGAGC	25	0.134409	GTGCTT	11	0.00127892		CTGTGG	3	0.000583658	GCATAG	2	0.000304925	TGCCTG	0	0	GGCCTT	0	0		ATGGAT	62	0.175637	TTGCCG	48	0.116505	CTATAC	20	0.0444444	TGCACG	6	0.00225649		ATGCAG	72	0.0164496	TTGATG	54	0.0148392	TGTACT	3	0.000804937	ATTGCG	3
GTGTGT	457	0.136215	TATCGG	142	0.151386	TATCTT	25	0.134409	TTTGAA	11	0.00127892		AATATA	3	0.000583658	TGCGTC	2	0.000304925	GACCAA	0	0	GGCGCG	0	0		TTACAA	62	0.175637	CAGACA	48	0.116505	TGGAAG	20	0.0444444	TTTTAT	6	0.00225649		GTGCGT	72	0.0164496	GTGGCA	54	0.0148392	TCGCAC	3	0.000804937	ACTGTC	3
GTTTCA	457	0.136215	GTAGCC	140	0.149254	TTTGTC	25	0.134409	TCTACC	10	0.00116266		AAATCT	3	0.000583658	GCAGGC	2	0.000304925	GGCCCG	0	0	CCGATA	0	0		TGGTAG	62	0.175637	TAGGCG	47	0.114078	TTACTT	20	0.0444444	GTTTAC	6	0.00225649		TTGATC	71	0.0162212	TGTGCA	54	0.0148392	TAGCTC	3	0.000804937	CTTTAC	3
GGTGAC	457	0.136215	TGGTAC	140	0.149254	CTGTAC	25	0.134409	TAGCGG	10	0.00116266		AAAGTT	3	0.000583658	GCCACC	2	0.000304925	GGCCCC	0	0	TTCTAC	0	0		GTTGCT	61	0.172805	TAGTGC	47	0.114078	TGGATG	19	0.0422222	TTCCTT	6	0.00225649		TGGACT	71	0.0162212	CTATAC	54	0.0148392	TTCCCT	3	0.000804937	TCGCCA	3
ATGCGT	456	0.135917	TTAATG	140	0.149254	GTTGCA	25	0.134409	TAGCAG	10	0.00116266		GCACCG	3	0.000583658	GATTAT	2	0.000304925	TTTGAC	0	0	GGCGAT	0	0		GTGACC	61	0.172805	AGACAA	47	0.114078	TTCCAC	19	0.0422222	GTTGTT	6	0.00225649		TAGCCA	70	0.0159927	TAGTAA	54	0.0148392	TTCTCA	3	0.000804937	GGGCAT	3
TCGCTC	456	0.135917	CTTCTC	140	0.149254	CTTTCA	25	0.134409	CTTTCA	10	0.00116266		TCACTT	3	0.000583658	GATTGG	2	0.000304925	GTGACA	0	0	GTGGCC	0	0		TTCTAT	61	0.172805	TTGCAG	47	0.114078	AATGCG	19	0.0422222	TTTCGG	5	0.00188041		TTGGAA	69	0.0157642	TTGAAG	53	0.0145644	ATTGTA	3	0.000804937	TGGAAA	3
GTGGTT	456	0.135917	CCTGAG	139	0.148188	ATGGAT	25	0.134409	GTTTCC	10	0.00116266		ATTCGT	3	0.000583658	TCAATA	2	0.000304925	GGCCGG	0	0	AACAGT	0	0		TGACTC	61	0.172805	CTTGAT	46	0.11165	CTTTTA	19	0.0422222	GCGACG	5	0.00188041		GTTTAC	69	0.0157642	ATGCAT	53	0.0145644	TGGCTA	3	0.000804937	TAGTCG	3
GTGTAT	455	0.135618	CTCGCA	139	0.148188	TGGAGA	25	0.134409	TGACAG	10	0.00116266		TTACGA	3	0.000583658	GCGCTC	2	0.000304925	GGCCGC	0	0	GTGGAT	0	0		TCGTCA	61	0.172805	GTGTTC	46	0.11165	GTGAAA	19	0.0422222	TTCTCT	5	0.00188041		GGACAG	69	0.0157642	TGACGG	53	0.0145644	CTTTAC	3	0.000804937	TGGTTT	3
TATCAG	455	0.135618	CTCGAC	138	0.147122	AAGACA	25	0.134409	TTCTCA	10	0.00116266		TGTAGT	3	0.000583658	GCGGGG	2	0.000304925	ATTATG	0	0	GTGGGG	0	0		TTCACA	61	0.172805	TTCCGT	46	0.11165	AAGACA	18	0.04	GGTGTC	5	0.00188041		AGACAA	68	0.0155358	TTCCCC	53	0.0145644	TGGCTG	3	0.000804937	TGCGCA	3
CTGTTT	455	0.135618	TCGCAT	138	0.147122	TAGAAG	24	0.129032	CTGGTC	10	0.00116266		TGCGTG	3	0.000583658	TGTATA	2	0.000304925	GTGGAC	0	0	GTGGGC	0	0		TGGTAC	61	0.172805	TCGCGG	46	0.11165	TTATCA	18	0.04	CTGCAA	5	0.00188041		TCTCTG	67	0.0153073	ACTGTC	52	0.0142896	TTCCTT	3	0.000804937	CAGACA	3
CTAGAT	455	0.135618	TGTCCT	138	0.147122	CTAGCC	24	0.129032	TGGTTC	10	0.00116266		CGGACA	3	0.000583658	GCGGCC	2	0.000304925	TATTCG	0	0	GGTCTT	0	0		GGGACA	61	0.172805	TGGATA	46	0.11165	TGTATT	18	0.04	ATTGCC	5	0.00188041		ATGCAC	67	0.0153073	CTGGCA	52	0.0142896	TGTCAT	3	0.000804937	TTTCAT	3
TGACCG	453	0.135022	TTCCAT	137	0.146055	TCGCGT	24	0.129032	TTATAC	10	0.00116266		TGGTGC	3	0.000583658	TTTCTG	2	0.000304925	GTGCTT	0	0	GTGGCT	0	0		GTGTTC	61	0.172805	TGGATG	46	0.11165	TTCCCC	18	0.04	ATTGCG	5	0.00188041		GTGGCA	66	0.0150788	TGGAGT	52	0.0142896	TGACTA	3	0.000804937	CTTGTT	3
TGTACT	453	0.135022	CTAGGC	137	0.146055	CTGGCC	24	0.129032	GTGGCG	10	0.00116266		GCCGCG	3	0.000583658	AGCCGC	2	0.000304925	GTGGCG	0	0	GTGCTG	0	0		TTGGAT	61	0.172805	TAGTCT	46	0.11165	CTGGAA	17	0.0377778	CTTCAC	5	0.00188041		TGGTCG	66	0.0150788	ATGACG	51	0.0140148	CTGGCA	3	0.000804937	TCGCAA	3
TGGTGA	453	0.135022	GTGTAC	137	0.146055	GTGTAT	24	0.129032	CTGGCA	10	0.00116266		AAGTTT	3	0.000583658	GCCTCC	2	0.000304925	GTGGCC	0	0	GTGCTC	0	0		TAGCAG	61	0.172805	CTAGAC	46	0.11165	TATCCA	17	0.0377778	GTGGCA	5	0.00188041		TGACTG	65	0.0148504	GCGTCA	51	0.0140148	TGACGA	3	0.000804937	TGCCTA	3
TACGCG	453	0.135022	TGGTTA	136	0.144989	TTTCTC	24	0.129032	TTATTT	10	0.00116266		TGGACC	3	0.000583658	AGTACC	2	0.000304925	GCTCTT	0	0	TTGCCA	0	0		TGGCGA	61	0.172805	TAGTAC	45	0.109223	TTCCTT	16	0.0355556	TGGTGG	5	0.00188041		CTTGCA	63	0.0143934	CTAGCG	51	0.0140148	TTTCGC	3	0.000804937	TTCCGT	3
TAGTAG	452	0.134724	TGACTT	135	0.143923	TCGCCT	24	0.129032	TGGTGC	10	0.00116266		AGATGG	3	0.000583658	GATTTC	2	0.000304925	GTGGAT	0	0	GTGACC	0	0		CTGGCA	60	0.169972	GTAGAC	45	0.109223	ATTGTA	16	0.0355556	ATAGAC	5	0.00188041		TCGGCG	63	0.0143934	TTCATT	51	0.0140148	TATACG	3	0.000804937	TATTCA	3
CTTGTT	451	0.134426	CGACAG	135	0.143923	TAGTCC	24	0.129032	CGCGAG	10	0.00116266		ATATTT	3	0.000583658	AGTTTC	2	0.000304925	GTGCGG	0	0	GTGGAG	0	0		TGGCTA	60	0.169972	ACTCAG	45	0.109223	TTCCAA	16	0.0355556	CTTTAT	5	0.00188041		TTTCCC	63	0.0143934	TTGCCA	51	0.0140148	TGGATA	3	0.000804937	TGGCTA	3
CTAGCT	450	0.134128	TGTCGT	135	0.143923	TGGTTC	24	0.129032	TAATCA	9	0.00104639		ATATCT	3	0.000583658	GGTACA	2	0.000304925	GTGCGC	0	0	GTGGAC	0	0		TGTGCA	60	0.169972	AGACAT	45	0.109223	ATTGTT	16	0.0355556	TGGAAT	5	0.00188041		AAGACA	63	0.0143934	TTTCCC	51	0.0140148	ATGCTG	3	0.000804937	TTGGAG	3
TGCCAG	450	0.134128	AGACAC	134	0.142857	GTTGAT	24	0.129032	ATGTCG	9	0.00104639		GTGGCT	3	0.000583658	CTTACG	2	0.000304925	GAAATT	0	0	GGTTCT	0	0		TTTCAG	60	0.169972	TAGAAC	45	0.109223	CTAGAA	16	0.0355556	TCGCTT	5	0.00188041		TAGCCT	63	0.0143934	TGACTG	51	0.0140148	CTGACA	3	0.000804937	TTCATT	3
CTGTTC	449	0.13383	GTTTAT	134	0.142857	TCGCAG	24	0.129032	ATTTTC	9	0.00104639		GGCCTG	3	0.000583658	GTAGCT	2	0.000304925	GTGCCT	0	0	GTGCTT	0	0		TTGAGT	60	0.169972	CTTGCC	45	0.109223	TACGCA	16	0.0355556	TAGGCG	5	0.00188041		TCTATT	63	0.0143934	TGGTGG	51	0.0140148	TTCCAG	3	0.000804937	TGGCTC	3
GTGTCT	449	0.13383	TGTCAT	133	0.141791	TGTGCA	24	0.129032	TTTGAG	9	0.00104639		CTCGCT	3	0.000583658	GTTTTA	2	0.000304925	CCTGAA	0	0	GTGTCG	0	0		TTGTGA	60	0.169972	ATGCAT	45	0.109223	CAGACA	16	0.0355556	TAGCAG	5	0.00188041		TTTTAT	62	0.014165	TAGACG	50	0.01374	TTGGAT	3	0.000804937	TTAAGC	3
GTTACG	448	0.133532	GGGACG	132	0.140725	CTAGAG	24	0.129032	ATTGGC	9	0.00104639		GTTACG	3	0.000583658	ATTTTC	2	0.000304925	GTGCTC	0	0	GTGTCC	0	0		TTGCGA	60	0.169972	GTTGCA	45	0.109223	TAGTCT	15	0.0333333	TTTTAC	5	0.00188041		GTGGCG	62	0.014165	TTTATA	49	0.0134652	GCCGCG	3	0.000804937	TGGCAG	3
CTTACT	447	0.133234	TACCCT	132	0.140725	TCGACA	23	0.123656	ATATTT	9	0.00104639		CCTTAG	3	0.000583658	GTATAT	2	0.000304925	GTGTCG	0	0	GAACAC	0	0		TAGCCA	60	0.169972	TCGCCT	44	0.106796	TAGATG	15	0.0333333	TAGAAG	5	0.00188041		TAGATA	62	0.014165	ATTGCC	49	0.0134652	CTCCCG	3	0.000804937	CTAGGC	3
CTGCTG	447	0.133234	AGACTT	132	0.140725	TATTCT	23	0.123656	ATTGTT	9	0.00104639		CTGCTT	3	0.000583658	AGATAC	2	0.000304925	ACTTAA	0	0	GTCATA	0	0		CTTGTA	60	0.169972	TGCTAT	44	0.106796	TTTGTG	15	0.0333333	TGGTTG	5	0.00188041		CATCTT	61	0.0139365	TTTAAC	48	0.0131904	CAGACA	3	0.000804937	TGCCCG	3
CTACGG	446	0.132936	ATGCAG	132	0.140725	ATGACC	23	0.123656	ACGAGT	9	0.00104639		TGGGCT	3	0.000583658	CTTAAG	2	0.000304925	GTGTAG	0	0	GTGTGG	0	0		TGTGCG	60	0.169972	TTTTAC	44	0.106796	ATGGAC	15	0.0333333	ATTACA	5	0.00188041		CTAGCG	61	0.0139365	TTGGCA	48	0.0131904	GGGGGC	3	0.000804937	TTCCAT	3
TAGCCG	444	0.13234	CTGTCA	132	0.140725	TGACGG	23	0.123656	CGGCCG	9	0.00104639		GTGGAG	3	0.000583658	TTGAAA	2	0.000304925	GTGTAC	0	0	GTGTGC	0	0		TTCCCC	60	0.169972	TGGCTG	43	0.104369	TGCTAT	15	0.0333333	TGGTGC	5	0.00188041		TTCATT	60	0.013708	TGCACT	48	0.0131904	TTCCAA	3	0.000804937	TGGCCC	3
TAGTGT	443	0.132042	TAGTTC	132	0.140725	TACCAC	23	0.123656	TATTCA	9	0.00104639		GGGCAG	2	0.000389105	CTTCCC	2	0.000304925	CAGTCA	0	0	CCATAT	0	0		TTTACG	59	0.167139	TTGTAA	43	0.104369	TGGCCC	15	0.0333333	TCGCAA	5	0.00188041		ATGCAT	60	0.013708	GTGACT	48	0.0131904	GTGATA	3	0.000804937	CTGCAT	2
GTACTT	443	0.132042	GTGAAC	132	0.140725	TGACGA	23	0.123656	TTTCGG	9	0.00104639		GCTTGT	2	0.000389105	GTACTG	2	0.000304925	GTGGTT	0	0	GTGTCT	0	0		CTGGAC	59	0.167139	AAGACA	42	0.101942	TGGTCG	14	0.0311111	TACACG	5	0.00188041		TTTCTT	59	0.0134796	AAGACA	47	0.0129156	AGACTT	3	0.000804937	GCCCTG	2
TACTCT	443	0.132042	ATGCGA	132	0.140725	TGCACA	23	0.123656	CGTGCC	9	0.00104639		GGTGTT	2	0.000389105	TATCCC	2	0.000304925	GTTGAC	0	0	GTGGTG	0	0		CTGTTC	59	0.167139	TTGCGG	42	0.101942	TCGCAT	14	0.0311111	TTTGTT	5	0.00188041		CTATAC	59	0.0134796	CTGCAA	47	0.0129156	TTTAAG	2	0.000536625	GGGAAT	2
TGGTGC	443	0.132042	CTTGTT	132	0.140725	TTTAAG	23	0.123656	GTGGGG	9	0.00104639		TTATCA	2	0.000389105	GTGTAT	2	0.000304925	AGGGGA	0	0	CCAATA	0	0		GTGCCC	59	0.167139	TTTACA	42	0.101942	CTGACG	14	0.0311111	CGTGAT	5	0.00188041		TTTCAC	58	0.0132511	ATGACT	47	0.0129156	TCAGGC	2	0.000536625	TTGGAA	2
TTTGCG	443	0.132042	TACCCA	131	0.139659	GTGCTC	22	0.11828	GTGCAC	9	0.00104639		GGTTAG	2	0.000389105	CTCGGC	2	0.000304925	CACCGG	0	0	ATACCG	0	0		CTCGAC	59	0.167139	GTTGAT	42	0.101942	GTGTTC	14	0.0311111	TAGTAT	5	0.00188041		TGTGCA	58	0.0132511	TAGCCT	47	0.0129156	GTCTAA	2	0.000536625	TTACAG	2
TTTAGC	442	0.131744	TAGAGG	130	0.138593	TAGCGG	22	0.11828	TTACTT	9	0.00104639		CACATT	2	0.000389105	TATCGA	2	0.000304925	GTGTAT	0	0	GTGGGT	0	0		CGTGCA	59	0.167139	GAGACG	42	0.101942	TACACA	14	0.0311111	TAGCAA	5	0.00188041		TTTCCG	58	0.0132511	ATTGAC	47	0.0129156	GGAACA	2	0.000536625	GTGGGT	2
TTCACC	442	0.131744	CTGTGC	130	0.138593	TGGCTG	22	0.11828	TACCTC	9	0.00104639		GGGCTC	2	0.000389105	CACAGA	2	0.000304925	GTGGGG	0	0	GTGTAG	0	0		TTCTCT	59	0.167139	ATGCAG	42	0.101942	TTTATC	14	0.0311111	GGACAA	5	0.00188041		TATACC	57	0.0130226	CTTGAA	46	0.0126408	TAACAA	2	0.000536625	GTGCGG	2
GTACCT	442	0.131744	CTATGC	130	0.138593	TTGTGC	22	0.11828	GTGTGG	9	0.00104639		TCACCA	2	0.000389105	GTGTAC	2	0.000304925	GTGGGC	0	0	GTGTAC	0	0		TGGCAA	59	0.167139	CTTTCA	42	0.101942	ATGCAT	14	0.0311111	TGTCCT	5	0.00188041		TAGTAA	57	0.0130226	CTTGCG	46	0.0126408	TATCCA	2	0.000536625	GTGTAC	2
GTTACT	442	0.131744	TATACC	129	0.137527	CTGGAG	22	0.11828	GGTGAC	9	0.00104639		GTGGAT	2	0.000389105	GATATA	2	0.000304925	AGAGCG	0	0	TTGTAC	0	0		TTTCTA	59	0.167139	TGTATT	41	0.0995146	TGTTGC	13	0.0288889	GTGTAC	5	0.00188041		TATCCA	56	0.0127942	TAGCGG	46	0.0126408	GTGGCT	2	0.000536625	TTTGCG	2
TATACT	441	0.131446	TCGCTA	129	0.137527	TAGTTT	22	0.11828	CTGGAG	9	0.00104639		AGGCCG	2	0.000389105	GTGATC	2	0.000304925	GTGGCT	0	0	GTGGTT	0	0		TACCCA	59	0.167139	TTGCGA	41	0.0995146	TCGCAC	13	0.0288889	TTTCCG	5	0.00188041		GCGGTG	55	0.0125657	TTTACA	46	0.0126408	TCGACC	2	0.000536625	TTGGAT	2
GTGTCG	441	0.131446	TGACAC	129	0.137527	ATATCG	22	0.11828	TTAAAC	9	0.00104639		AGACGG	2	0.000389105	CTGAGG	2	0.000304925	GTGGTG	0	0	TGAGAG	0	0		TTCAAT	58	0.164306	TAGAAG	41	0.0995146	GGTGAC	13	0.0288889	TCGCGG	5	0.00188041		GGTGCT	55	0.0125657	CTTGCA	45	0.012366	TCGCAA	2	0.000536625	CGTTTG	2
CTATTT	439	0.130849	TTGGAT	129	0.137527	TCGACC	22	0.11828	TGACAC	9	0.00104639		ACTCCT	2	0.000389105	ACTGCC	2	0.000304925	GGCAGA	0	0	GTGAAT	0	0		ATGCAA	58	0.164306	TAGTCC	41	0.0995146	TTGGTT	13	0.0288889	GTGTGC	5	0.00188041		TTCCAG	54	0.0123372	TGACCA	45	0.012366	TTCCTA	2	0.000536625	GGCTGC	2
ATGCAC	438	0.130551	GCGACG	129	0.137527	TTGGCA	22	0.11828	TGGAGT	9	0.00104639		GGTTCC	2	0.000389105	ATTACA	2	0.000304925	TAGGGC	0	0	GTGAAG	0	0		CTTCCT	58	0.164306	TAGTGT	41	0.0995146	TTACAT	13	0.0288889	TGGCCG	5	0.00188041		CTGGCA	53	0.0121088	ATTGAA	45	0.012366	CTTCAC	2	0.000536625	TTTCGC	2
CTATCA	437	0.130253	CTACCC	129	0.137527	TGGCCA	22	0.11828	TGACTG	9	0.00104639		GACGGG	2	0.000389105	CTGACC	2	0.000304925	GTGGGT	0	0	GTGAGT	0	0		TCGACC	58	0.164306	GTAGCA	41	0.0995146	TTTTAC	13	0.0288889	TGGTAG	5	0.00188041		TTACAT	53	0.0121088	ATGCAG	44	0.0120912	TTTCTT	2	0.000536625	GTACAC	2
ATAGAC	436	0.129955	TGTAAT	129	0.137527	GTAGAC	22	0.11828	TGCGGG	9	0.00104639		GACTAG	2	0.000389105	AGAACG	2	0.000304925	GTGAAC	0	0	GATGAA	0	0		AGACTT	58	0.164306	TATCAT	40	0.0970874	TTCTCA	13	0.0288889	CTTGAA	5	0.00188041		TTACAA	51	0.0116518	TAGATA	44	0.0120912	CTTCCC	2	0.000536625	TTTAAA	2
TTACGG	436	0.129955	CCAGGG	128	0.136461	CTTACA	21	0.112903	TCGCGC	9	0.00104639		GCCGTA	2	0.000389105	GTCGCC	2	0.000304925	GAAGTC	0	0	CTATAA	0	0		TGACTG	58	0.164306	TTTAAC	40	0.0970874	CTAGAT	13	0.0288889	CGTGCA	5	0.00188041		ACGCGA	51	0.0116518	TATCCA	44	0.0120912	GTTATC	2	0.000536625	GCGTGA	2
CATCCA	436	0.129955	GTGCTA	128	0.136461	CTTGCT	21	0.112903	TCGTTT	9	0.00104639		ATTTAT	2	0.000389105	CAGTTG	2	0.000304925	GTCTTT	0	0	AATCAA	0	0		TGTCCA	58	0.164306	TTACAA	40	0.0970874	TGTCAT	13	0.0288889	TAGCAC	4	0.00150432		TGCACT	51	0.0116518	TTTGAC	44	0.0120912	CTGGAA	2	0.000536625	CGGTTA	2
CTGCGG	435	0.129657	GTGGTC	128	0.136461	TGGACT	21	0.112903	CTTCCT	9	0.00104639		CCCACA	2	0.000389105	ATATTT	2	0.000304925	GTCTTG	0	0	GTCTTC	0	0		AGACAG	58	0.164306	TTTTAT	40	0.0970874	ATTGCT	12	0.0266667	TAGCTC	4	0.00150432		TGGAAC	50	0.0114233	TCGCAC	44	0.0120912	CCAATG	2	0.000536625	ATTGTT	2
TCGCAG	434	0.129359	TAGTCC	128	0.136461	TTGATT	21	0.112903	CTGCTC	9	0.00104639		TTGAGA	2	0.000389105	ATATTC	2	0.000304925	GTGACC	0	0	CGCAAT	0	0		GTGCAA	57	0.161473	TTTTCC	39	0.0946602	TGGTTT	12	0.0266667	TAGATA	4	0.00150432		CGTTTG	50	0.0114233	AGACAG	44	0.0120912	TTTCGT	2	0.000536625	GCGGTG	2
CTGCGT	434	0.129359	GTGGTT	128	0.136461	CCTGAG	21	0.112903	CTGCCT	9	0.00104639		ATTCCC	2	0.000389105	ACAGCT	2	0.000304925	GTTCAA	0	0	GTCTGT	0	0		TTTACA	57	0.161473	GCGACG	39	0.0946602	TCGCGT	12	0.0266667	TCGCAG	4	0.00150432		TTGGTT	50	0.0114233	TAGTCT	43	0.0118164	ACTGTC	2	0.000536625	GGACAA	2
GCGCGG	434	0.129359	TGTGCG	128	0.136461	TATGCA	20	0.107527	TTTCAT	9	0.00104639		AGGCAG	2	0.000389105	CGGGCT	2	0.000304925	GTGAAT	0	0	GTCTGG	0	0		CTAGCC	57	0.161473	TGGTCC	39	0.0946602	CTTCAC	12	0.0266667	GTGTGT	4	0.00150432		CCTGCC	49	0.0111949	TGGCAG	43	0.0118164	CTATAC	2	0.000536625	GGGCAG	2
ATTGCG	433	0.129061	CTTACG	127	0.135394	TTACTA	20	0.107527	TTTTAG	9	0.00104639		ATCTAG	2	0.000389105	AGCCTT	2	0.000304925	GTGAAG	0	0	GTGAAC	0	0		TGCTAT	57	0.161473	TGACGA	38	0.092233	GTAGCG	12	0.0266667	TAGTAC	4	0.00150432		CTTGAC	49	0.0111949	TTACAA	43	0.0118164	TGGCTC	2	0.000536625	ATGACG	2
GGTGCG	433	0.129061	TCGCGT	127	0.135394	GTGACT	20	0.107527	CTTTAT	9	0.00104639		CACCCT	2	0.000389105	GGCTTC	2	0.000304925	ACTCTA	0	0	AAGAGT	0	0		GTGGAT	57	0.161473	TCGACA	38	0.092233	TGGTGG	12	0.0266667	TAGAGC	4	0.00150432		TGGTGG	48	0.0109664	TGGTCG	43	0.0118164	CGGCTG	2	0.000536625	GTACTT	2
CTCGAC	432	0.128763	TGGCGC	127	0.135394	CTTGGA	20	0.107527	TGTTCA	9	0.00104639		TCATGA	2	0.000389105	ATTATA	2	0.000304925	TTCACT	0	0	GTCTTT	0	0		CTACAC	57	0.161473	TTCCCG	38	0.092233	TGGATA	12	0.0266667	TGGAAG	4	0.00150432		GTGAAA	47	0.0107379	TAGACT	42	0.0115416	TTTGAA	2	0.000536625	CTTCAG	2
GTAGCC	432	0.128763	GTCGAC	127	0.135394	ATTGTT	20	0.107527	TTGGTC	9	0.00104639		GCCCGG	2	0.000389105	AGATCA	2	0.000304925	GTCTCT	0	0	GTCTTG	0	0		TGGCCA	57	0.161473	TTGCTA	38	0.092233	GTGCCT	12	0.0266667	GTTCAC	4	0.00150432		TAGTCG	47	0.0107379	TGGACG	42	0.0115416	GTGGTG	2	0.000536625	CTCGAC	2
TGATAC	432	0.128763	TGGCAG	127	0.135394	CTGGTA	20	0.107527	TTGGGG	9	0.00104639		GGTACT	2	0.000389105	GGGACC	2	0.000304925	GTCTCG	0	0	GTGCCT	0	0		ATGCGT	57	0.161473	TGGACA	38	0.092233	GTAGCC	12	0.0266667	GTGGTC	4	0.00150432		TTCCGT	46	0.0105095	TTACAG	42	0.0115416	TACCAC	2	0.000536625	GCGCAG	2
TTATAC	431	0.128465	TTGGAG	126	0.134328	GTGCTA	19	0.102151	TTTTTG	8	0.000930124		GCTCAG	2	0.000389105	TTCTTT	2	0.000304925	GTCTTC	0	0	GTGCCG	0	0		GTGTTA	57	0.161473	CTGGTG	38	0.092233	GTGGAA	12	0.0266667	GTGTTC	4	0.00150432		TAACAA	46	0.0105095	TATAAA	42	0.0115416	TTTGGC	2	0.000536625	GGGCGT	2
TTCCTG	430	0.128167	TTTCTG	126	0.134328	TGTTAT	19	0.102151	TTGGTG	8	0.000930124		GGTAAG	2	0.000389105	AACACA	2	0.000304925	CGCAGA	0	0	GTGCCC	0	0		TGGATG	57	0.161473	TATCCG	38	0.092233	GTGTTT	11	0.0244444	GTTACT	4	0.00150432		GTGTCT	46	0.0105095	TCGCAA	42	0.0115416	TAAACC	2	0.000536625	TTCCTA	2
TATACC	429	0.127869	ATGTCA	126	0.134328	GTGGAC	19	0.102151	TGGTCG	8	0.000930124		TGGCCC	2	0.000389105	GCTCAC	2	0.000304925	TAAGAA	0	0	TTTGTC	0	0		TATCGT	57	0.161473	ACGACA	38	0.092233	GTGTAC	11	0.0244444	GTGCCG	4	0.00150432		TTTTAA	46	0.0105095	TCGCCT	42	0.0115416	TAGGCA	2	0.000536625	GTGCGA	2
TATCAT	429	0.127869	TGGAGT	126	0.134328	CAGACA	19	0.102151	ATTGTA	8	0.000930124		AGTCGG	2	0.000389105	TCTACA	2	0.000304925	GTCTGG	0	0	GTGCGT	0	0		TTTTAG	56	0.15864	GTAGCT	37	0.0898058	TAGTAG	11	0.0244444	TTCCCC	4	0.00150432		TGACCA	45	0.010281	TTGCAT	42	0.0115416	TGTTGC	2	0.000536625	GTGCCT	2
TTACGC	429	0.127869	CTGCGC	126	0.134328	TTTCGG	19	0.102151	CTTGAA	8	0.000930124		GGCCAC	2	0.000389105	AAGACT	2	0.000304925	GTGCAC	0	0	GTGCGG	0	0		CTCGCG	56	0.15864	TCGCTT	37	0.0898058	TAGAAG	11	0.0244444	TGGATG	4	0.00150432		TTGCAA	45	0.010281	TGGATA	41	0.0112668	ATTGAA	2	0.000536625	TTGGTT	2
CTGTGG	428	0.127571	TGGTAG	125	0.133262	ATGGCA	19	0.102151	TTCCAT	8	0.000930124		TGGGTG	2	0.000389105	CTTTGT	2	0.000304925	TTGAAC	0	0	GTGCGC	0	0		TTCCCA	56	0.15864	TGTTAT	37	0.0898058	TGTTCA	11	0.0244444	TGTGCA	4	0.00150432		TACCCA	45	0.010281	CTGGCG	41	0.0112668	GTGGAT	2	0.000536625	GTGAGC	2
TACCTA	428	0.127571	CTGACC	125	0.133262	CTTCCC	19	0.102151	TTGGGC	8	0.000930124		TAGGCG	2	0.000389105	AGATCT	2	0.000304925	TTAAGA	0	0	TGACAC	0	0		TACTCA	56	0.15864	CTGCAC	37	0.0898058	CCATAC	11	0.0244444	TGTGAC	4	0.00150432		CCAAGA	45	0.010281	GAGACG	41	0.0112668	TGTCTC	2	0.000536625	TTAGGC	2
CGTGCG	427	0.127273	CTGTTA	125	0.133262	TAGCCA	18	0.0967742	ATCTTC	8	0.000930124		ATTGAC	2	0.000389105	GGTTCT	2	0.000304925	GTGATG	0	0	AACAGA	0	0		CTTCAC	56	0.15864	TAGTTT	37	0.0898058	TAGTTC	11	0.0244444	TTTCCC	4	0.00150432		CAGACA	44	0.0100525	TAGCTG	41	0.0112668	TTATAG	2	0.000536625	CGTGTC	2
ATGGAC	427	0.127273	TAGATT	125	0.133262	TAGAGC	18	0.0967742	ATCGAC	8	0.000930124		GCTTCA	2	0.000389105	CTTTGC	2	0.000304925	CCAAGA	0	0	GTGATG	0	0		ATGTAC	56	0.15864	ACTAGC	37	0.0898058	TAGGAA	11	0.0244444	TGCAAA	4	0.00150432		AGACAG	44	0.0100525	ATGGTC	41	0.0112668	GTGCAA	2	0.000536625	GTGATT	2
TGTTAC	426	0.126975	TGACCG	123	0.13113	TTGCGC	18	0.0967742	ACTCAT	8	0.000930124		TAGTCG	2	0.000389105	GGGTTC	2	0.000304925	GGAAAA	0	0	GTGATC	0	0		CTGTAC	56	0.15864	GTTGAA	37	0.0898058	TGCCCA	10	0.0222222	CTGGTC	4	0.00150432		CTGGCG	44	0.0100525	TTTAAT	41	0.0112668	TGGAGA	2	0.000536625	GGACAG	2
ATGCTT	426	0.126975	ATGCAT	123	0.13113	TACACC	18	0.0967742	TCTGCA	8	0.000930124		AACAGA	2	0.000389105	GGCAAC	2	0.000304925	CTTGTT	0	0	TTGGCA	0	0		TACAAA	55	0.155807	GTGTGC	37	0.0898058	ATGCAC	10	0.0222222	CTATAC	4	0.00150432		TGGACA	44	0.0100525	TGACAA	40	0.010992	TCCATG	2	0.000536625	GGGTAT	2
GTGAAG	425	0.126677	CTATCG	122	0.130064	CTGGCT	18	0.0967742	ATGGCG	8	0.000930124		ATAAGC	2	0.000389105	GGGTAT	2	0.000304925	ATTTTA	0	0	CAGTCA	0	0		TTCGCA	55	0.155807	TTTGTG	37	0.0898058	TAGAAC	10	0.0222222	TGACAC	4	0.00150432		ATGACT	44	0.0100525	TCGCGG	40	0.010992	GTGCGA	2	0.000536625	TATCCA	2
ACACAG	424	0.126379	TCGCCA	122	0.130064	CTACCA	18	0.0967742	GTTGGC	8	0.000930124		TGGATT	2	0.000389105	ATGGGC	2	0.000304925	GTGAGC	0	0	GTGCAG	0	0		TAGAAT	55	0.155807	TATCCC	36	0.0873786	GTTCCT	10	0.0222222	TGCTAT	4	0.00150432		TTCCCG	43	0.00982408	TATACC	40	0.010992	GTGCCC	2	0.000536625	CATTTT	2
TACATT	424	0.126379	TGGCCG	122	0.130064	TTTGAC	18	0.0967742	TATGCA	8	0.000930124		CTTTCC	2	0.000389105	GGTCAG	2	0.000304925	GTTCTC	0	0	ACCCTA	0	0		GTAGCT	55	0.155807	TAGACA	36	0.0873786	TGTGGG	10	0.0222222	TTTGTC	4	0.00150432		TAGTCT	43	0.00982408	TTGACC	40	0.010992	CGGGAT	2	0.000536625	TTTCCG	2
ATGCCA	423	0.12608	TGGCAC	122	0.130064	GTGACA	17	0.0913978	CTTTCG	8	0.000930124		GGTTTG	2	0.000389105	TCGGGA	2	0.000304925	GTGACT	0	0	GAATTC	0	0		GTAGCC	55	0.155807	TACCCA	36	0.0873786	CTTGAC	10	0.0222222	TTCTCA	4	0.00150432		GCGTCA	43	0.00982408	TGGTTC	40	0.010992	ATGCAT	2	0.000536625	AGACAC	2
TCGCTG	423	0.12608	GATGAC	122	0.130064	TGACTA	17	0.0913978	CTTCTT	8	0.000930124		TCCGCA	2	0.000389105	ATTGTC	2	0.000304925	GTGACG	0	0	GTTGCC	0	0		TCGTGC	55	0.155807	AGACAG	35	0.0849515	TCCATT	10	0.0222222	AAGACA	4	0.00150432		TGGTAG	43	0.00982408	GTTGCA	39	0.0107172	CTGAGC	2	0.000536625	TATACC	2
TATACG	423	0.12608	TGGTCT	121	0.128998	GTAGTT	17	0.0913978	CTTCTA	8	0.000930124		CACCTT	2	0.000389105	TTTTCT	2	0.000304925	ATTCCA	0	0	ACGCAA	0	0		CTGACT	54	0.152975	TACCAA	35	0.0849515	TACACC	10	0.0222222	TGTCAT	4	0.00150432		CTGTAC	42	0.00959561	CTAGTA	39	0.0107172	TGTTTT	2	0.000536625	AGGCTG	2
TGGGCG	422	0.125782	TTACAC	121	0.128998	CTACAC	17	0.0913978	CTGTAG	8	0.000930124		GGGGCG	2	0.000389105	GTATAG	2	0.000304925	AGGTCC	0	0	GTTGAT	0	0		TATATC	54	0.152975	TGGAGG	35	0.0849515	GTGCTT	10	0.0222222	TGGTCT	4	0.00150432		CCACTG	42	0.00959561	ATTGCT	39	0.0107172	TGACGC	2	0.000536625	AGGCAC	2
CTATCG	422	0.125782	TGACGT	121	0.128998	TTGCCT	17	0.0913978	CTGCAG	8	0.000930124		TAGCGT	2	0.000389105	TCTAAG	2	0.000304925	GTGAGT	0	0	GATTGA	0	0		TGACGC	54	0.152975	CTTCAC	35	0.0849515	GGACAA	10	0.0222222	TATCGT	4	0.00150432		ATTGCC	42	0.00959561	TTTCTA	39	0.0107172	TTTGCC	2	0.000536625	TATGCA	2
TCGCAT	421	0.125484	TATCCA	121	0.128998	TTCTCT	17	0.0913978	TGGTGA	8	0.000930124		GTTCAT	2	0.000389105	ATTTCG	2	0.000304925	GTGAGG	0	0	GTTGGC	0	0		TAGCAA	54	0.152975	TATCGT	35	0.0849515	CTGTCC	9	0.02	GTGAAG	4	0.00150432		TCGCAA	42	0.00959561	TCGCGT	38	0.0104424	TACCGT	2	0.000536625	TATACG	2
CTGTGT	421	0.125484	ATTACA	121	0.128998	CTAGTA	17	0.0913978	CTTCCC	8	0.000930124		GGTGGG	2	0.000389105	AATACT	2	0.000304925	GAAGGG	0	0	ACGAGG	0	0		TAGAAC	54	0.152975	GTAGCG	34	0.0825243	AGACAG	9	0.02	ATTGAA	4	0.00150432		CGACAG	41	0.00936715	TAGTGT	38	0.0104424	TTAACA	2	0.000536625	TAGTAC	2
TCTACT	420	0.125186	TATACG	120	0.127932	TAGACT	17	0.0913978	TAGGCG	8	0.000930124		GGGGAC	2	0.000389105	TTCTTC	2	0.000304925	CCTCCA	0	0	GTTGCT	0	0		TATCTC	54	0.152975	CTTTAT	34	0.0825243	TTGGTC	9	0.02	TGTGGG	4	0.00150432		CGACAT	41	0.00936715	GTGATC	37	0.0101676	CACAGG	2	0.000536625	CTAGCG	2
TATCTG	420	0.125186	CTTCCC	120	0.127932	TTGCTC	16	0.0860215	GTTGGT	8	0.000930124		TAGCAC	2	0.000389105	CAGAGG	2	0.000304925	ATCCTA	0	0	GTTGCG	0	0		TTCATT	54	0.152975	TTGGTA	34	0.0825243	GTGTAA	9	0.02	TGGTGA	4	0.00150432		TGGAGT	41	0.00936715	TACCCA	37	0.0101676	CTAGAC	2	0.000536625	TAGCTA	2
CTCGCA	419	0.124888	TTACTC	120	0.127932	GTTACT	16	0.0860215	TCGCGG	8	0.000930124		TCAACA	2	0.000389105	TACCGA	2	0.000304925	GTTGCC	0	0	GTTCTC	0	0		GTTGGC	54	0.152975	TTGAAA	34	0.0825243	CTAGAG	9	0.02	GAGACA	4	0.00150432		GTGGAA	41	0.00936715	CTGTAC	37	0.0101676	ATGCAG	2	0.000536625	TAGGCA	2
GGTGCA	419	0.124888	TATCAC	120	0.127932	TTGATA	16	0.0860215	TGTGCA	8	0.000930124		CACGTT	2	0.000389105	TCGTGG	2	0.000304925	GCCAGC	0	0	AACGAA	0	0		ATGACG	53	0.150142	TACCTT	34	0.0825243	TATCCG	9	0.02	TTCGCG	4	0.00150432		TTTCGT	40	0.00913868	TTTTAC	37	0.0101676	GGGTCA	2	0.000536625	TTACTG	2
GTTTCC	419	0.124888	TGTGCA	120	0.127932	TTGAAC	16	0.0860215	GTGGCC	8	0.000930124		GGTCGG	2	0.000389105	TTCCTC	2	0.000304925	CCAGAA	0	0	GTTCGT	0	0		TATCCG	53	0.150142	TTGAAT	34	0.0825243	ACTCAG	9	0.02	CTAGCG	4	0.00150432		TCGCCT	40	0.00913868	CCACTG	36	0.00989283	CTAGAA	2	0.000536625	TAGTAT	2
TTCGAT	419	0.124888	CTAGAG	119	0.126866	CTTCCG	15	0.0806452	ATTTCC	8	0.000930124		ACGTCG	2	0.000389105	AAACGG	2	0.000304925	GACGCA	0	0	GTTACG	0	0		GTGCTG	53	0.150142	TTGGTG	34	0.0825243	CTGGTA	9	0.02	CCCCAC	4	0.00150432		GTGACC	40	0.00913868	CGACAT	36	0.00989283	ATTTCT	2	0.000536625	ATATCT	2
GTTTCG	418	0.12459	TAGCAG	119	0.126866	TTGCCG	15	0.0806452	TGGTCA	8	0.000930124		AGGCTC	2	0.000389105	AACCCG	2	0.000304925	GTTCGC	0	0	GTTGAC	0	0		ATGCAT	53	0.150142	ATGGAC	33	0.0800971	TTTGTT	9	0.02	CTTGGC	4	0.00150432		GTTGTT	40	0.00913868	CTGGAA	36	0.00989283	AGCCGC	2	0.000536625	TCGCAT	2
TACTGC	418	0.12459	CTTTGC	119	0.126866	TCGCTA	15	0.0806452	ATTTAC	8	0.000930124		ATCACT	2	0.000389105	CCGTCG	2	0.000304925	ATAGAG	0	0	GTTCGA	0	0		CTAGTC	53	0.150142	GTGCTA	33	0.0800971	TTTAAC	9	0.02	GTGCTA	4	0.00150432		CGGTTA	39	0.00891021	ATTGTA	36	0.00989283	TTAAAC	2	0.000536625	TTGAGG	2
GTTCTT	418	0.12459	GTTTCG	119	0.126866	CTGCAC	15	0.0806452	CTGTGT	8	0.000930124		CTTGCC	2	0.000389105	CAATTT	2	0.000304925	GTTCCT	0	0	GTTCTT	0	0		TTCTCG	53	0.150142	CTAGAT	33	0.0800971	TTACAA	9	0.02	TTTGTG	4	0.00150432		TTTTCC	39	0.00891021	CAGACA	35	0.00961803	CGGCAC	2	0.000536625	ATGCTG	2
GTGTTC	418	0.12459	GTGCTG	119	0.126866	GTTCCT	15	0.0806452	ATTGTG	8	0.000930124		AGGCTT	2	0.000389105	TGTTGA	2	0.000304925	GTTCCG	0	0	GTTCTG	0	0		ATAGAC	53	0.150142	GTGCCT	33	0.0800971	TAGTTA	9	0.02	TTTGAG	4	0.00150432		TAGTGT	39	0.00891021	TGGAGG	35	0.00961803	TTCTCT	2	0.000536625	CACGCC	2
GTAGTA	418	0.12459	CTGCCA	118	0.1258	TTGCCC	15	0.0806452	CTTCTC	8	0.000930124		GTACAC	2	0.000389105	CCCACG	2	0.000304925	GGCTGA	0	0	CTTCTA	0	0		TATCGG	53	0.150142	TTCCTA	33	0.0800971	GAGACG	9	0.02	TATGCA	4	0.00150432		TAGAAC	39	0.00891021	GTGTCA	35	0.00961803	TCCTAA	2	0.000536625	TGACGG	2
GCGCAC	418	0.12459	TGTCAG	118	0.1258	GTGTGC	14	0.0752688	GCGACA	7	0.000813859		AGTTGC	2	0.000389105	CCGGTA	2	0.000304925	AGCTAT	0	0	GTTTCC	0	0		ATTGAT	53	0.150142	TTATCA	33	0.0800971	TATTCA	9	0.02	AGCGTC	4	0.00150432		TTTGTA	38	0.00868175	CGGTTA	35	0.00961803	GGTGCT	2	0.000536625	ATTGAC	2
TGTACC	418	0.12459	TAGGCG	118	0.1258	CTTGTG	14	0.0752688	CGACAC	7	0.000813859		AGCCGC	2	0.000389105	TCGGTG	2	0.000304925	GTTCGT	0	0	ATCCGC	0	0		AGTGCA	53	0.150142	TGGTGA	33	0.0800971	TGGAGA	9	0.02	TCGTGC	4	0.00150432		TTGCGT	37	0.00845328	TTTTCC	34	0.00934323	GAGACA	2	0.000536625	TCCGTT	2
CTTCAC	417	0.124292	CTCGCG	118	0.1258	TAGAGT	14	0.0752688	TAATTT	7	0.000813859		TCTGGA	2	0.000389105	CGAGAT	2	0.000304925	GTTCGG	0	0	GTTTAT	0	0		TATCAC	53	0.150142	GTGGAT	33	0.0800971	TTGGTG	9	0.02	CGTGTA	4	0.00150432		TACCAA	37	0.00845328	TTGATC	34	0.00934323	CATGGC	2	0.000536625	TCCGCA	2
ATTGAT	417	0.124292	TTAACG	117	0.124733	TTTTGC	14	0.0752688	TAGAGT	7	0.000813859		TAAGAG	2	0.000389105	CATGCC	2	0.000304925	GTTTAC	0	0	TGGGCG	0	0		GTGCTC	53	0.150142	TTCACC	33	0.0800971	AAATCG	8	0.0177778	GGTGAC	4	0.00150432		GGACAC	36	0.00822481	CGCCTC	34	0.00934323	TCGGCG	2	0.000536625	CTGGCA	2
TTCCCG	416	0.123994	GTTGTC	117	0.124733	TTACAC	14	0.0752688	TAGCTA	7	0.000813859		CTATAT	2	0.000389105	TGCCTC	2	0.000304925	CCGACA	0	0	GTTTGC	0	0		CTGGAG	52	0.147309	GTGATT	32	0.0776699	ATAGAC	8	0.0177778	ACTAGC	4	0.00150432		TCGCGT	36	0.00822481	TGGTGA	33	0.00906843	TTACCC	2	0.000536625	TGGAAT	2
GTGGCC	416	0.123994	TGGTCA	117	0.124733	TTGCGA	14	0.0752688	GGTGAT	7	0.000813859		CTCGGG	2	0.000389105	CAACAG	2	0.000304925	GTTGTT	0	0	TATGTA	0	0		TAGCAC	52	0.147309	GTGAAT	32	0.0776699	ACGACA	8	0.0177778	TGACTT	4	0.00150432		GTGTCA	36	0.00822481	CTTGAC	33	0.00906843	AGACAG	2	0.000536625	GTGCTG	2
CTTCTC	416	0.123994	TGTCAC	117	0.124733	TGTTGC	14	0.0752688	CTATAC	7	0.000813859		GCGCGA	2	0.000389105	CGCTGT	2	0.000304925	GTTGTG	0	0	GTTTCT	0	0		TTCCTA	52	0.147309	TTTCAG	31	0.0752427	CTAGCC	8	0.0177778	AGACAA	4	0.00150432		TAGTAT	36	0.00822481	TATCCT	33	0.00906843	TACCCA	2	0.000536625	TATTTT	2
TGGGCA	416	0.123994	GTGATT	117	0.124733	GTCGAC	14	0.0752688	ATGATG	7	0.000813859		GTCGGG	2	0.000389105	TCGACT	2	0.000304925	GGGGTA	0	0	GTTGTC	0	0		ACGACG	52	0.147309	TACACA	31	0.0752427	TATCGA	8	0.0177778	CTTTTA	3	0.00112824		ATGCGC	35	0.00799634	AGACAA	33	0.00906843	GGGTTT	2	0.000536625	TCCTAT	2
CAGCGG	416	0.123994	CTGGAT	117	0.124733	GTGATT	14	0.0752688	TGTGTG	7	0.000813859		ACTGTG	2	0.000389105	TCGCAT	2	0.000304925	TTTGTA	0	0	TTCCCT	0	0		GTGGCT	52	0.147309	TACCCT	31	0.0752427	TAGTGC	8	0.0177778	GTTGGC	3	0.00112824		CGCCTC	35	0.00799634	GGACAT	33	0.00906843	ATGATC	2	0.000536625	CATGAA	2
GTTGTC	415	0.123696	CTTACA	117	0.124733	GTATCG	13	0.0698925	TTAAGA	7	0.000813859		GGGGCT	2	0.000389105	GTTCCA	2	0.000304925	GTTTAT	0	0	GTTGGT	0	0		CTGGCT	52	0.147309	TCGCGA	31	0.0752427	GCGACG	8	0.0177778	GTGGCT	3	0.00112824		CTCGAC	35	0.00799634	TAGTGC	33	0.00906843	TACCAA	2	0.000536625	TGGATA	2
GGGCGA	414	0.123398	TAGCTT	117	0.124733	TATCCC	13	0.0698925	TAGGCC	7	0.000813859		TAAGCG	2	0.000389105	GAATCA	2	0.000304925	GTTTAG	0	0	AAGGGA	0	0		TGTTCC	52	0.147309	CTGGCC	31	0.0752427	TTCCTA	8	0.0177778	CTTGGA	3	0.00112824		TAGCTG	34	0.00776788	CTCGAC	32	0.00879362	TAGTAT	2	0.000536625	TCAATT	2
TCGTTT	414	0.123398	GTAGCA	116	0.123667	GTTACG	13	0.0698925	CTACAC	7	0.000813859		CGAACA	2	0.000389105	TTCTTA	2	0.000304925	GTTGGC	0	0	GTTTAG	0	0		TTAACG	52	0.147309	CTAGCC	31	0.0752427	TTAGCA	8	0.0177778	TGTACC	3	0.00112824		TTGGTA	34	0.00776788	TCGCTA	32	0.00879362	ATACAA	2	0.000536625	TAGAAC	2
TTCTAG	414	0.123398	GTTTAC	115	0.122601	GTAGAT	13	0.0698925	CTGTCA	7	0.000813859		CTAGAC	2	0.000389105	CGGTCA	2	0.000304925	TTCTTT	0	0	GTTTAC	0	0		TTACAC	52	0.147309	TTTTCG	30	0.0728155	TAGTGT	8	0.0177778	CTGTAC	3	0.00112824		ATTGCT	34	0.00776788	CTAGCA	32	0.00879362	TCGCGT	2	0.000536625	TGACTG	2
TGCTTA	411	0.122504	TACACA	115	0.122601	TGGACC	13	0.0698925	TAGTTT	7	0.000813859		GGCTGG	2	0.000389105	CCGGTT	2	0.000304925	CAAATA	0	0	TGTGTA	0	0		CTTTTT	52	0.147309	AGTGCA	30	0.0728155	ATGACC	8	0.0177778	CTTCTC	3	0.00112824		GTGCCA	33	0.00753941	TAGACA	32	0.00879362	TAGATA	2	0.000536625	TGGAGT	2
CTAGTA	410	0.122206	TGTCCC	115	0.122601	TTGCGT	13	0.0698925	TTAGAC	7	0.000813859		GAGTGT	2	0.000389105	CAAGCA	2	0.000304925	GTTGCG	0	0	GTTGTT	0	0		ATGCTT	52	0.147309	TTTCGG	30	0.0728155	TAGTCG	8	0.0177778	TATCCG	3	0.00112824		TTATTA	33	0.00753941	TTATTA	31	0.00851882	TTGGAA	2	0.000536625	GTTTAC	2
TACATC	410	0.122206	TTGGTA	114	0.121535	ACGACG	13	0.0698925	TTACGC	7	0.000813859		TTTGGG	2	0.000389105	CTTAAC	2	0.000304925	GTTGTC	0	0	GTTACC	0	0		TTTATG	52	0.147309	ATGACC	30	0.0728155	TGTCGC	8	0.0177778	CTTACA	3	0.00112824		GAGACA	33	0.00753941	TATCGC	31	0.00851882	GCCCAT	2	0.000536625	TAACAA	2
TATATA	409	0.121908	TAGGTT	114	0.121535	TTGCCA	13	0.0698925	GGCGGG	7	0.000813859		TAACTT	2	0.000389105	TCGGGG	2	0.000304925	GCATCC	0	0	TAGGCA	0	0		CTTGTG	51	0.144476	TTTGAG	30	0.0728155	TATCGC	8	0.0177778	CTTTAA	3	0.00112824		ACTGTC	33	0.00753941	TTTCTC	31	0.00851882	GTTGAG	2	0.000536625	TTTTCC	2
GTATGT	408	0.12161	TTGGGA	113	0.120469	TTCAAT	13	0.0698925	TTTAGC	7	0.000813859		TAACAG	2	0.000389105	GACGGA	2	0.000304925	GTTGGT	0	0	GTTAAT	0	0		GCTGTG	51	0.144476	TACACT	30	0.0728155	TTTAAT	8	0.0177778	CTACCC	3	0.00112824		TCGCAC	33	0.00753941	TGGTTA	31	0.00851882	TCTTCG	2	0.000536625	TGACAT	2
GTGTAG	408	0.12161	TGTGCT	113	0.120469	GTGGTA	12	0.0645161	CGAGAC	7	0.000813859		GTCTTG	2	0.000389105	CACTAT	2	0.000304925	GTTGGG	0	0	GTTAGG	0	0		TAGTTC	51	0.144476	GTGAAA	30	0.0728155	TGACGC	8	0.0177778	CTTGGT	3	0.00112824		TATGCA	32	0.00731094	TATGCA	31	0.00851882	TGTGCA	2	0.000536625	TAAACC	2
TCGTCT	408	0.12161	TTGTTG	113	0.120469	TGACGT	12	0.0645161	GTGCGC	7	0.000813859		TCTAAG	2	0.000389105	GTGAAT	2	0.000304925	GTTAAC	0	0	GTTAGC	0	0		GTAGCA	51	0.144476	TTGACA	30	0.0728155	TTGGTA	8	0.0177778	GTTACC	3	0.00112824		AGTACG	32	0.00731094	TTGCGG	30	0.00824402	ACCACC	2	0.000536625	CTTACT	2
CTTTGA	407	0.121311	TGACTA	113	0.120469	GAGACT	12	0.0645161	TAGCGA	7	0.000813859		CATTCA	2	0.000389105	TTGGGA	2	0.000304925	ACTACA	0	0	CATTGA	0	0		TAGGCT	51	0.144476	TGACGC	30	0.0728155	TATCCC	8	0.0177778	GATACA	3	0.00112824		TTTAAC	32	0.00731094	TAGCCA	30	0.00824402	TGTCTG	2	0.000536625	TATTCG	2
ATGCAT	407	0.121311	TGTACC	113	0.120469	TATCCG	12	0.0645161	TGTTTT	7	0.000813859		CTTAGG	2	0.000389105	TGACGG	2	0.000304925	ATGTGA	0	0	GTTACT	0	0		TATAAA	51	0.144476	TGTTCC	30	0.0728155	TTTCTC	7	0.0155556	GTGTCC	3	0.00112824		GAGACG	32	0.00731094	TGTATT	30	0.00824402	TGACTG	2	0.000536625	TCGAGG	2
GAGCGG	405	0.120715	TACCTA	113	0.120469	TAGACC	12	0.0645161	CGCGGG	7	0.000813859		GCGGGT	2	0.000389105	TAGCTA	2	0.000304925	GTGTTG	0	0	TGGGAA	0	0		TGGAAG	51	0.144476	CTGGTA	29	0.0703883	AGACAC	7	0.0155556	TGGAAA	3	0.00112824		TTTTCG	31	0.00708248	TAGTAT	29	0.00796922	CGCTTA	2	0.000536625	ATTCTC	2
TAGCTT	404	0.120417	TGGCTG	113	0.120469	ATGCGA	12	0.0645161	CGCCCG	7	0.000813859		GTGAGC	2	0.000389105	CGGTGA	2	0.000304925	GTTACC	0	0	GTGTTC	0	0		TTATCA	51	0.144476	TGACTA	29	0.0703883	TGTCTT	7	0.0155556	TAGAAA	3	0.00112824		TTTTAC	31	0.00708248	TGGTAG	29	0.00796922	TAGATT	2	0.000536625	GTTACC	2
GTTTAC	404	0.120417	TGGCCC	113	0.120469	TTACCA	12	0.0645161	GTTACT	7	0.000813859		CTAATC	2	0.000389105	TTATCC	2	0.000304925	ACCGGT	0	0	CGAACA	0	0		TGGTCC	51	0.144476	TGTCCA	29	0.0703883	CTTCCC	7	0.0155556	GGGCGC	3	0.00112824		TATAAA	31	0.00708248	TTGGTA	29	0.00796922	CTTTTC	2	0.000536625	GTTCGA	2
TACTCA	404	0.120417	GTCACA	112	0.119403	CTGACA	12	0.0645161	GTGTAT	7	0.000813859		CTACAG	2	0.000389105	AATCTG	2	0.000304925	GTTAAT	0	0	GTCAAA	0	0		TTACAG	51	0.144476	GTGGCT	29	0.0703883	TACCAC	7	0.0155556	TTAACG	3	0.00112824		GGGAAT	31	0.00708248	TTCAAA	29	0.00796922	TATCCT	2	0.000536625	CAGGCC	2
TTCCGG	403	0.120119	TTCCCA	112	0.119403	CTTGAT	11	0.0591398	GGGGGG	7	0.000813859		GGGGGA	2	0.000389105	CTCGTC	2	0.000304925	GTTAAG	0	0	GTTAAG	0	0		TATCCA	51	0.144476	CTGGAA	29	0.0703883	TGGTCC	7	0.0155556	CTGGAA	3	0.00112824		GTGCAT	31	0.00708248	TAGATG	29	0.00796922	CGATGT	2	0.000536625	GTGTAT	2
TGTTGG	403	0.120119	TAGTGA	112	0.119403	TTTGTT	11	0.0591398	TGTGCC	7	0.000813859		AGCATT	2	0.000389105	CCTCAC	2	0.000304925	GTGTGC	0	0	CAGGAA	0	0		CTTGCC	51	0.144476	TTTCTC	29	0.0703883	TGACGA	7	0.0155556	CTGGCC	3	0.00112824		AGACGT	30	0.00685401	TGACCT	29	0.00796922	TATTCA	2	0.000536625	TTTCTT	2
TCGTGC	403	0.120119	TACTCT	112	0.119403	TGCTAT	11	0.0591398	GGTGTG	7	0.000813859		GGCGCT	2	0.000389105	CACTAG	2	0.000304925	GACCTC	0	0	TTAGGC	0	0		CTGCAC	51	0.144476	GTGGTA	29	0.0703883	TATCCT	7	0.0155556	CCTGAG	3	0.00112824		TTTATA	30	0.00685401	GGACAC	29	0.00796922	GGGGCT	2	0.000536625	GTTGGA	2
ATTCAT	403	0.120119	ATGCTT	112	0.119403	TTACTC	11	0.0591398	TCGGCA	7	0.000813859		TCAAGA	2	0.000389105	TGAGCT	2	0.000304925	AACAAA	0	0	GTGTTT	0	0		TGACGT	51	0.144476	CTGGAG	29	0.0703883	CTTTAA	7	0.0155556	TCTCAA	3	0.00112824		TGGTTA	30	0.00685401	TTGAAA	28	0.00769442	ATGACG	2	0.000536625	TGTATT	2
GTTATT	402	0.119821	CTACCA	112	0.119403	TGCGGG	11	0.0591398	AGGGGG	7	0.000813859		GTGCTC	2	0.000389105	TGAGCG	2	0.000304925	GTGCTA	0	0	GTTCCG	0	0		TTGTGT	51	0.144476	CTGCAA	29	0.0703883	GTGCTC	7	0.0155556	CTGCAT	3	0.00112824		GTTGAC	29	0.00662554	TTCACC	28	0.00769442	TGGCAG	2	0.000536625	GCGGGG	2
ATGGTG	402	0.119821	CGGACA	112	0.119403	TACCCG	11	0.0591398	GGTGCG	7	0.000813859		GTCTCG	2	0.000389105	CCTACT	2	0.000304925	GTGTTC	0	0	GTTCCC	0	0		TGTCGT	51	0.144476	TTCTAA	29	0.0703883	CTTTCA	7	0.0155556	CTGCAC	3	0.00112824		ATGCAA	29	0.00662554	GTTCGA	28	0.00769442	ATATCA	2	0.000536625	ATTGAT	2
CTTTCA	402	0.119821	TTCATC	112	0.119403	TAGTGG	11	0.0591398	AGCGTC	7	0.000813859		GGCGCC	2	0.000389105	TGACTC	2	0.000304925	ATGATC	0	0	GAAAGC	0	0		TTGTAG	50	0.141643	CTTTTA	29	0.0703883	GTAGCT	7	0.0155556	CGTGCG	3	0.00112824		AGTTGC	29	0.00662554	GTGGAA	28	0.00769442	TCGCCT	2	0.000536625	TACTCA	2
CTGACG	402	0.119821	TGCTAT	111	0.118337	CAGACG	11	0.0591398	GTAGCC	7	0.000813859		GTTATG	2	0.000389105	TTGAGA	2	0.000304925	GTGTGT	0	0	GTTCAT	0	0		CTAGCT	50	0.141643	CTACCA	28	0.0679612	GTAGCA	6	0.0133333	GTAGCG	3	0.00112824		TTCAAA	29	0.00662554	GTGCAT	28	0.00769442	GTGCAG	2	0.000536625	TTTTAA	2
CTGGTC	400	0.119225	GTACAC	111	0.118337	GATGAC	11	0.0591398	TGTCCC	7	0.000813859		ATTCAC	2	0.000389105	TTCGCG	2	0.000304925	AATGCA	0	0	GTTCGG	0	0		CTATGC	50	0.141643	TCGCAG	28	0.0679612	TAGAGC	6	0.0133333	ATGCAG	3	0.00112824		AGACGG	28	0.00639708	AGACGA	28	0.00769442	TGGAGG	2	0.000536625	GCCGGG	2
TTGGAC	399	0.118927	TTGTTT	111	0.118337	GTTGCG	11	0.0591398	CTGCCG	7	0.000813859		TATATA	2	0.000389105	TTATGG	2	0.000304925	GTTCAC	0	0	CGCTCA	0	0		TTGGTA	50	0.141643	TGTCAT	28	0.0679612	TTTTGC	6	0.0133333	CGTGAG	3	0.00112824		TTGCGA	28	0.00639708	TTGCAG	28	0.00769442	TGGAAA	2	0.000536625	TACCTT	2
CAGACT	398	0.118629	GTGCCC	111	0.118337	GTGATA	11	0.0591398	TCATTT	7	0.000813859		TTACTA	2	0.000389105	TCTGCG	2	0.000304925	GGCCGT	0	0	GGTTCC	0	0		TGTAAA	50	0.141643	GTGTAA	28	0.0679612	TACCGC	6	0.0133333	TATTCA	3	0.00112824		AGACGA	28	0.00639708	TAGAAC	28	0.00769442	CTGACG	2	0.000536625	TCCAGT	2
CGCACG	398	0.118629	GTGGTA	110	0.117271	TTGATG	10	0.0537634	CCGGCG	7	0.000813859		TAATAT	2	0.000389105	TTCCAC	2	0.000304925	GTTATT	0	0	CCAACA	0	0		TGGATT	50	0.141643	GTGATC	28	0.0679612	TGTGCG	6	0.0133333	TTCCTA	3	0.00112824		TTTAAT	27	0.00616861	CTGACG	28	0.00769442	CTGGAG	2	0.000536625	TGGTTA	2
GTTCTC	398	0.118629	TTCTTT	110	0.117271	CTGTCC	10	0.0537634	CATGCC	7	0.000813859		GCGCTC	2	0.000389105	ACTGTA	2	0.000304925	GTTATG	0	0	GTTATG	0	0		CTGACA	50	0.141643	TACAAA	28	0.0679612	CTAGTA	6	0.0133333	TATCGC	3	0.00112824		TGGGCA	27	0.00616861	CGACAG	28	0.00769442	CTTCTG	1	0.000268312	TAGACT	2
TTTCTG	398	0.118629	CTACCG	110	0.117271	CTGGTC	10	0.0537634	CCGAAT	7	0.000813859		CTCCCG	2	0.000389105	TCTTAG	2	0.000304925	GTTCCC	0	0	GTTATC	0	0		ATTTAC	50	0.141643	CTTGCG	28	0.0679612	GTGTTA	6	0.0133333	TCCCAT	3	0.00112824		TTACAG	27	0.00616861	AGACGT	27	0.00741962	GGCCGA	1	0.000268312	CAAATA	2
TACACA	397	0.118331	TACCGT	109	0.116205	TTCCTG	10	0.0537634	CTGACT	7	0.000813859		GTAGCT	2	0.000389105	TCTCTG	2	0.000304925	ACCAGG	0	0	GCTCGA	0	0		CTGCGG	50	0.141643	ACGACG	28	0.0679612	AGCGTC	6	0.0133333	TGTTGT	3	0.00112824		GTGATC	27	0.00616861	ATGCGC	27	0.00741962	GGCCTT	1	0.000268312	AAGTTA	2
CTAGGC	397	0.118331	CTGTCC	109	0.116205	CTGGAC	10	0.0537634	GCACAG	7	0.000813859		TGCACG	2	0.000389105	AACCGG	2	0.000304925	GTTCAT	0	0	GTTAGT	0	0		GTGAAA	50	0.141643	TGGAGA	27	0.065534	TGTCCT	6	0.0133333	GGCTCG	3	0.00112824		TTTGTC	27	0.00616861	TTTGTA	27	0.00741962	TCTCCA	1	0.000268312	TCTACA	2
CTGGGC	397	0.118331	GTGATC	109	0.116205	TTTCGA	10	0.0537634	GATGCT	7	0.000813859		TGCATA	2	0.000389105	CACTTT	2	0.000304925	GTTCAG	0	0	GTTCAG	0	0		TAGGCA	50	0.141643	TAGTAG	27	0.065534	TTCCCG	6	0.0133333	TGGTTA	3	0.00112824		CTGCAA	27	0.00616861	AGTTGC	27	0.00741962	GAGTTT	1	0.000268312	TCTATA	2
CTTCCC	397	0.118331	TTGGCC	109	0.116205	CGTGCA	10	0.0537634	TGTCCT	7	0.000813859		TATCCA	2	0.000389105	CTCACA	2	0.000304925	GTTAGC	0	0	GTTCAC	0	0		GTGGAG	50	0.141643	AGACAC	27	0.065534	CCCGAA	6	0.0133333	CTGACT	3	0.00112824		AGACGC	27	0.00616861	GTAGCG	27	0.00741962	TCTCCC	1	0.000268312	TGTACC	2
TTACGT	397	0.118331	GTAGTA	108	0.115139	TAGGCT	9	0.0483871	CTTGGT	7	0.000813859		CAGATA	2	0.000389105	CCTAAG	2	0.000304925	CGTTGG	0	0	AGACAT	0	0		TTGAAG	50	0.141643	TTACTT	27	0.065534	GTAGAT	6	0.0133333	TCGCCG	3	0.00112824		GTTCGA	27	0.00616861	TTTGTG	26	0.00714482	CTAATC	1	0.000268312	CTATAC	1
TTAGCG	397	0.118331	ATTGCG	108	0.115139	CTTTTA	9	0.0483871	TCGCCG	7	0.000813859		CGTGGG	2	0.000389105	ATGACT	2	0.000304925	TCGACA	0	0	GTTATT	0	0		TGGACC	50	0.141643	TACCAC	27	0.065534	TTTCGG	6	0.0133333	TAGAAT	3	0.00112824		CTGGAA	26	0.00594014	TGGCTG	26	0.00714482	AGGATA	1	0.000268312	GCATGG	1
CTGCAG	396	0.118033	CGACAC	108	0.115139	TTGCTA	9	0.0483871	CTGGGC	7	0.000813859		GGAATC	2	0.000389105	CAGGGA	2	0.000304925	GTTACG	0	0	GTAGCG	0	0		GTAGCG	50	0.141643	GTCGAC	27	0.065534	TATAAA	6	0.0133333	ATGCAT	3	0.00112824		TACCAT	26	0.00594014	ACGCGA	26	0.00714482	CTTCCG	1	0.000268312	TTGGTG	1
TTATGT	396	0.118033	ATGACG	108	0.115139	TACCAG	9	0.0483871	CTTAGT	7	0.000813859		TTCCGA	2	0.000389105	TGATGT	2	0.000304925	GTTATC	0	0	GTAGCC	0	0		GTGTTT	50	0.141643	GGCTCG	27	0.065534	TTTGTC	6	0.0133333	TATCCA	3	0.00112824		TACACA	26	0.00594014	TGGAGA	26	0.00714482	CTAAGT	1	0.000268312	CTGGGC	1
GTCACA	396	0.118033	CTAGCC	108	0.115139	TTACGC	9	0.0483871	ATTTAG	7	0.000813859		GTTGCC	2	0.000389105	GTAACT	2	0.000304925	TCTACC	0	0	GCTCAA	0	0		TTTTTC	50	0.141643	TTTTGC	26	0.0631068	TCGCCT	6	0.0133333	TATCAT	3	0.00112824		CACGCC	26	0.00594014	GTGCTT	26	0.00714482	CTCCGC	1	0.000268312	AGTTGC	1
TAGTCG	396	0.118033	CTGTTT	107	0.114072	ATGCGT	9	0.0483871	ATAGAC	7	0.000813859		GACACT	2	0.000389105	CCTGTT	2	0.000304925	TCGTAA	0	0	GTAGAT	0	0		GTGTCT	49	0.13881	TTCAAA	26	0.0631068	CTGCGG	5	0.0111111	TATACC	3	0.00112824		GATGGG	26	0.00594014	GTGCCA	26	0.00714482	TCTAGT	1	0.000268312	CTGGTT	1
CTTCTT	395	0.117735	GTTTCC	107	0.114072	GTCACA	9	0.0483871	TCGATT	7	0.000813859		GTATTC	2	0.000389105	CCATGG	2	0.000304925	CGTGAA	0	0	AACCTA	0	0		ATGACC	49	0.13881	GTGCTT	26	0.0631068	CCTAAA	5	0.0111111	TGACTC	3	0.00112824		TGGTGA	26	0.00594014	GAGACA	26	0.00714482	TGCCCG	1	0.000268312	CGTCAG	1
GTTTGA	394	0.117437	TTTTTC	106	0.113006	GTTCCA	9	0.0483871	CTGGCT	7	0.000813859		TAAAGA	2	0.000389105	TTTATC	2	0.000304925	GTAGAG	0	0	GTAGGC	0	0		TGACAA	49	0.13881	GTAGCC	26	0.0631068	CTAAGC	5	0.0111111	TGTTGC	3	0.00112824		ATCCTC	25	0.00571167	TGGGCA	25	0.00687002	TATCAG	1	0.000268312	CCGTCG	1
TTCACA	394	0.117437	TAGCTC	106	0.113006	TGTCCT	9	0.0483871	GCTAAT	7	0.000813859		AGTGCA	2	0.000389105	TCCAAG	2	0.000304925	GTAGAC	0	0	AGATGC	0	0		ATGGCA	49	0.13881	TTGCAA	26	0.0631068	TACCCG	5	0.0111111	TCCACG	3	0.00112824		GGGACA	25	0.00571167	TACCAC	25	0.00687002	CCTAAT	1	0.000268312	CTATAT	1
CTATAC	393	0.117139	TGTATC	106	0.113006	CGGACA	9	0.0483871	GTAAGG	7	0.000813859		TAAGGC	2	0.000389105	ACGCGG	2	0.000304925	TAGTAT	0	0	GTAGCT	0	0		ATGCGG	49	0.13881	CTAAGC	25	0.0606796	TGTCCA	5	0.0111111	TTAACC	3	0.00112824		TGCCAA	25	0.00571167	ATGCAA	25	0.00687002	GGTTGG	1	0.000268312	ATACGA	1
CTGTGC	393	0.117139	TACCGC	106	0.113006	GCCACA	9	0.0483871	GCCGGG	7	0.000813859		AGCGCC	2	0.000389105	CGTAGC	2	0.000304925	GTACTT	0	0	CAGACA	0	0		GTTTCA	49	0.13881	TTTGTT	25	0.0606796	TTCCGG	5	0.0111111	GTGTGG	3	0.00112824		GGCGGC	25	0.00571167	TGGACT	25	0.00687002	TTGGTG	1	0.000268312	CTGATC	1
TAGTGC	392	0.116841	TTGGGG	105	0.11194	CTGCAG	9	0.0483871	TTCCCT	7	0.000813859		CTTCAT	2	0.000389105	GACACA	2	0.000304925	GTAGCG	0	0	TACGCA	0	0		TGGACG	49	0.13881	TGACGT	25	0.0606796	GTGTCG	5	0.0111111	AGGCGG	3	0.00112824		TGGTTC	25	0.00571167	AGACGC	25	0.00687002	TCAACA	1	0.000268312	CTGAGT	1
GCACAG	392	0.116841	TTTGCG	105	0.11194	CTTTCG	9	0.0483871	ATCGCA	7	0.000813859		CTCACG	2	0.000389105	TTTGAG	2	0.000304925	GTAGCC	0	0	GGGTCC	0	0		TACCTT	49	0.13881	TTTCTA	25	0.0606796	GGGCGC	5	0.0111111	TGGAAC	3	0.00112824		TTGGTC	25	0.00571167	TTCCGC	25	0.00687002	TCTCAT	1	0.000268312	CACAGG	1
ATTGAG	392	0.116841	GTGTGG	105	0.11194	TGACCG	9	0.0483871	TGGGCA	7	0.000813859		CTGCCG	2	0.000389105	CTGGCA	2	0.000304925	CCAACT	0	0	AGTTCA	0	0		CTAGTA	49	0.13881	CGACAA	25	0.0606796	TTCAAA	5	0.0111111	TTTCAG	3	0.00112824		TACCAC	25	0.00571167	TAGAAG	25	0.00687002	TATAAG	1	0.000268312	ATAAGC	1
TTATGG	392	0.116841	TGTCTT	105	0.11194	CTTGCA	9	0.0483871	GCTCGG	7	0.000813859		TAGCGA	2	0.000389105	CGCCAG	2	0.000304925	CACCAA	0	0	GTAGAG	0	0		TTCCGG	49	0.13881	GGACAA	25	0.0606796	CCCCAC	5	0.0111111	TCGCCA	3	0.00112824		TCGCGG	24	0.00548321	CTGCAC	25	0.00687002	CTATGA	1	0.000268312	CTGCCC	1
GTGTAC	392	0.116841	TCGCTG	104	0.110874	TGGACG	9	0.0483871	ATTATA	7	0.000813859		GTAGTG	2	0.000389105	AAGTCG	2	0.000304925	GTACGG	0	0	GCTTCA	0	0		TAGGAA	49	0.13881	ATTGAC	25	0.0606796	GTCACA	5	0.0111111	TTATCA	3	0.00112824		CCGATT	24	0.00548321	TTTTCG	24	0.00659522	TCTAAT	1	0.000268312	TCGTCG	1
TTGGTA	391	0.116542	GTGGCT	104	0.110874	GTGAAT	9	0.0483871	ATGTCA	7	0.000813859		CTGGAT	2	0.000389105	GTGAGT	2	0.000304925	GTACGC	0	0	CTCCCT	0	0		GTGTCG	49	0.13881	CTTACA	24	0.0582524	TTTTCG	5	0.0111111	TACCAG	3	0.00112824		GGCCCA	24	0.00548321	GTGAAA	24	0.00659522	ATTGCT	1	0.000268312	TAGCTG	1
GTGTTA	391	0.116542	CTAGCA	103	0.109808	TAGAGG	9	0.0483871	TTCTTT	7	0.000813859		TAAGTT	2	0.000389105	ATTTGG	2	0.000304925	TAGCAC	0	0	GTACTT	0	0		TTCAAC	49	0.13881	TGTCAG	24	0.0582524	CTTACA	5	0.0111111	ATGCAC	3	0.00112824		AGACAC	23	0.00525474	TTTGTC	24	0.00659522	CGTGCA	1	0.000268312	CTCTGA	1
GAGGCG	391	0.116542	TGGAGA	103	0.109808	GTTGGC	8	0.0430108	TATCCT	6	0.000697593		GCTAGT	2	0.000389105	TCGCTA	2	0.000304925	TGTAGA	0	0	GTATCG	0	0		TGTTGC	49	0.13881	CTTGCA	24	0.0582524	GTGGTA	5	0.0111111	ATCCAC	3	0.00112824		TAGTGC	23	0.00525474	TTGGTC	24	0.00659522	TCAAGG	1	0.000268312	GAGCAG	1
TAGTCT	390	0.116244	GTTGGA	103	0.109808	CGTACC	8	0.0430108	CTAATC	6	0.000697593		CTGCTC	2	0.000389105	TTTCAC	2	0.000304925	GTACTG	0	0	AATGAA	0	0		GTGGAC	48	0.135977	TACCAT	24	0.0582524	ATGGAA	5	0.0111111	TCGTAT	3	0.00112824		AGGACA	23	0.00525474	TACACA	24	0.00659522	GGACGC	1	0.000268312	GGTCCG	1
TGTCGT	390	0.116244	TTACCG	103	0.109808	CTACTA	8	0.0430108	GTTGGG	6	0.000697593		GTAGTT	2	0.000389105	TTTCCG	2	0.000304925	GTACTC	0	0	TTTGCC	0	0		TTGCTA	48	0.135977	TGACGG	24	0.0582524	TGTCAG	5	0.0111111	ATGGCA	3	0.00112824		TGGAGC	23	0.00525474	TTCCTA	24	0.00659522	TGCGGG	1	0.000268312	CCTGGG	1
CTCGCT	390	0.116244	CTGCGG	103	0.109808	TACCCC	8	0.0430108	GGGTGG	6	0.000697593		ACTGCT	2	0.000389105	CATACT	2	0.000304925	AGCTAA	0	0	GTATAT	0	0		TAGAAA	48	0.135977	CTTCCC	24	0.0582524	CTATCA	5	0.0111111	CTGGCG	3	0.00112824		GGGTAT	23	0.00525474	CACGCC	24	0.00659522	TCGCGA	1	0.000268312	CTCTGT	1
CTTTAG	389	0.115946	AGGACA	103	0.109808	TGGACA	8	0.0430108	CCTTGT	6	0.000697593		CGGTTC	2	0.000389105	TCCATT	2	0.000304925	GTACGT	0	0	GTATGG	0	0		TGACAT	48	0.135977	CCGCAG	24	0.0582524	TGTTAT	5	0.0111111	TTTCAA	3	0.00112824		AATCGA	22	0.00502627	TTCCAG	24	0.00659522	ATCAGA	1	0.000268312	CTGGAA	1
TGACTG	389	0.115946	TAGCGA	102	0.108742	GGTGCA	8	0.0430108	GTTCCT	6	0.000697593		GCCCCG	2	0.000389105	CTATCA	2	0.000304925	GTATAG	0	0	GTATGC	0	0		GTGCTT	48	0.135977	CGTGCA	24	0.0582524	TAGGCT	5	0.0111111	CCGCGC	3	0.00112824		TGGATG	22	0.00502627	GGACGG	24	0.00659522	CTACTT	1	0.000268312	CTCAGC	1
TGTCTA	389	0.115946	CTGGCA	102	0.108742	GTGGCC	8	0.0430108	TCGCTT	6	0.000697593		AAGTAC	2	0.000389105	ATTGTT	2	0.000304925	GTATAC	0	0	TCATAC	0	0		TCGCGA	48	0.135977	ATGCGT	24	0.0582524	TACCCA	5	0.0111111	TACCGC	3	0.00112824		TGGAGA	22	0.00502627	TGGAAC	24	0.00659522	CTAGAG	1	0.000268312	ATAATT	1
TACCCT	388	0.115648	TAGTAC	102	0.108742	TGTGCC	8	0.0430108	TTTTGG	6	0.000697593		GTCACA	2	0.000389105	GCCTCA	2	0.000304925	TGAGAA	0	0	GTATCT	0	0		TTGTAC	48	0.135977	GTCATT	23	0.0558252	GACCTT	5	0.0111111	TACACT	3	0.00112824		TACATG	22	0.00502627	GTGTAT	23	0.00632042	TCCATC	1	0.000268312	CTATGC	1
TCGCTA	388	0.115648	GGTGCG	101	0.107676	GGCTCG	8	0.0430108	TCAACC	6	0.000697593		GTCCCG	2	0.000389105	CAGTCT	2	0.000304925	GTAGTT	0	0	GTAGTG	0	0		TATTAT	48	0.135977	CTAGCT	23	0.0558252	TCCGCA	5	0.0111111	TACACA	3	0.00112824		ACGACA	22	0.00502627	TACCAT	23	0.00632042	CTAGCC	1	0.000268312	TGACCT	1
CTGACT	388	0.115648	AGGACG	101	0.107676	TGGTTG	8	0.0430108	TAGATG	6	0.000697593		CATGTT	2	0.000389105	TTTTGC	2	0.000304925	GTCGAC	0	0	ATGCAA	0	0		TTGATA	48	0.135977	TCGCTA	23	0.0558252	TTTGAG	5	0.0111111	TTTTGT	3	0.00112824		TAGATG	22	0.00502627	TATCAT	23	0.00632042	GGATTT	1	0.000268312	GTACAG	1
TATAAT	388	0.115648	ACGACG	101	0.107676	GTGGTG	8	0.0430108	CCGGGG	6	0.000697593		ATCGCC	2	0.000389105	TGCATA	2	0.000304925	GTATCC	0	0	GTCAGC	0	0		GCGACG	48	0.135977	TTTAAG	23	0.0558252	TGCGAT	5	0.0111111	TTTATA	3	0.00112824		TCGCTA	21	0.00479781	ACGACA	23	0.00632042	CGTCAG	1	0.000268312	TTTATG	1
TTTGGC	387	0.11535	TGGTAT	101	0.107676	TTTACA	8	0.0430108	TATTAT	6	0.000697593		GCCCGC	2	0.000389105	TGGTCC	2	0.000304925	AACACC	0	0	ATTTCA	0	0		CTTTCG	48	0.135977	CTTTAA	23	0.0558252	CTGGCC	5	0.0111111	TTTCTA	3	0.00112824		TATCAT	21	0.00479781	TTTGTT	23	0.00632042	CGTGAC	1	0.000268312	CGCGAG	1
TTGGAT	387	0.11535	TTGGGC	100	0.10661	TTGCGG	8	0.0430108	TCCCCG	6	0.000697593		TGTTCC	2	0.000389105	CGCGCG	2	0.000304925	GTATAT	0	0	GAGTTA	0	0		TATATT	48	0.135977	GTGGAG	23	0.0558252	GTGAAT	4	0.00888889	CTAGAA	3	0.00112824		CTGACG	21	0.00479781	CATATT	22	0.00604562	TCGGCA	1	0.000268312	CTGCGC	1
TCCTCA	387	0.11535	TTTTGA	100	0.10661	GTACAC	8	0.0430108	TATTTT	6	0.000697593		CATGCG	2	0.000389105	TGGTGG	2	0.000304925	GTAGGG	0	0	GTATAC	0	0		TAGCTA	48	0.135977	TGTTGC	23	0.0558252	TTTAAG	4	0.00888889	ACGACA	3	0.00112824		CTAGCA	21	0.00479781	TCGTCA	22	0.00604562	TGGGCG	1	0.000268312	CTCCAA	1
GAGCGC	387	0.11535	CTTCAT	100	0.10661	TAGTTA	8	0.0430108	ATGGCC	6	0.000697593		CTCAAT	2	0.000389105	CAAGTA	2	0.000304925	GTAGGC	0	0	GAACTC	0	0		TTAACT	48	0.135977	TTCGCA	23	0.0558252	TTCACC	4	0.00888889	TGTCAA	2	0.000752162		TTACAC	20	0.00456934	TTGGTG	22	0.00604562	AGTTCT	1	0.000268312	CTCCAC	1
TATCCC	386	0.115052	GGCTCG	100	0.10661	GTCTAC	7	0.0376344	AGGGCT	6	0.000697593		TGTATC	2	0.000389105	CGCCGT	2	0.000304925	CGACGG	0	0	GTAGTT	0	0		TAGTGG	47	0.133144	GGGACG	22	0.0533981	GTGTGT	4	0.00888889	ATGTCT	2	0.000752162		CATATT	20	0.00456934	CTTTAT	22	0.00604562	TCCGCA	1	0.000268312	CTGCTT	1
TTGTTG	384	0.114456	GTGTGA	99	0.105544	GTGAAG	7	0.0376344	CGGGAC	6	0.000697593		CCGTAG	2	0.000389105	GGTAGA	2	0.000304925	GTAGCT	0	0	GTAACG	0	0		GTTCCA	47	0.133144	CTGACT	22	0.0533981	GGCCCC	4	0.00888889	GGACAG	2	0.000752162		ATGGTC	20	0.00456934	TGACCG	22	0.00604562	CGTGGT	1	0.000268312	CCCGTA	1
CTGCCA	384	0.114456	TACCCC	99	0.105544	TACACG	7	0.0376344	GTTTCT	6	0.000697593		GCCCTT	2	0.000389105	GTATTA	2	0.000304925	GTAGTG	0	0	GTAACC	0	0		TACCAT	47	0.133144	TGTTCT	22	0.0533981	TAGTCC	4	0.00888889	CTGGTA	2	0.000752162		TCGTCA	20	0.00456934	TGGATG	22	0.00604562	ATTACG	1	0.000268312	TAAGGT	1
ATGCTC	383	0.114158	TTACCC	99	0.105544	TTTATG	7	0.0376344	ATAGTC	6	0.000697593		TGGTTA	2	0.000389105	CTTTGA	2	0.000304925	GCGACA	0	0	GATTTT	0	0		TTGAGG	47	0.133144	GTTACG	22	0.0533981	CCCTTG	4	0.00888889	GGACGC	2	0.000752162		TGACCT	20	0.00456934	AGACGG	22	0.00604562	TCCGGT	1	0.000268312	CCACGA	1
TCGTCC	383	0.114158	CTTTCT	99	0.105544	TTGCAG	7	0.0376344	ATTCCC	6	0.000697593		CCCTTC	2	0.000389105	TTTTAT	2	0.000304925	CGCGTT	0	0	GTAAGT	0	0		GTTTAT	47	0.133144	CCCCAC	22	0.0533981	TGGCTG	4	0.00888889	GAGCTA	2	0.000752162		TAGAAT	19	0.00434087	TTGCGT	22	0.00604562	AGTACT	1	0.000268312	CCGATT	1
TATCGA	383	0.114158	TGGATC	99	0.105544	TAGAGA	7	0.0376344	TCGTGC	6	0.000697593		TTAGTT	2	0.000389105	TTTGGT	2	0.000304925	GTAGGT	0	0	AATAGA	0	0		CTAGAA	47	0.133144	CTTGAA	22	0.0533981	TTTATA	4	0.00888889	AAGACT	2	0.000752162		ATTGTA	19	0.00434087	TAAACC	22	0.00604562	CGTGCG	1	0.000268312	CCCTTC	1
GTAGCA	383	0.114158	GTGGAT	98	0.104478	GGACAG	7	0.0376344	GCGGGG	6	0.000697593		GATAGG	2	0.000389105	TCCCTC	2	0.000304925	GTAAAG	0	0	GTAGCA	0	0		TCGACA	47	0.133144	GTTTCA	22	0.0533981	GTGTTG	4	0.00888889	GGACAC	2	0.000752162		CAGGCC	18	0.00411241	TACCGT	21	0.00577082	GCCGAG	1	0.000268312	AGACCG	1
CTTCCG	383	0.114158	GTGCAC	98	0.104478	CCCTTG	7	0.0376344	CTGAAT	6	0.000697593		TTAGAG	2	0.000389105	TCCGGG	2	0.000304925	AAATTA	0	0	TCGTGA	0	0		ATCCAC	47	0.133144	ATATCG	21	0.0509709	GTCATT	4	0.00888889	TTTCTC	2	0.000752162		TGTCCA	18	0.00411241	TTTTTT	21	0.00577082	GCTGGC	1	0.000268312	CGTGGG	1
GTTAAC	383	0.114158	TGGCGA	97	0.103412	TGTCCC	7	0.0376344	CTGAAG	6	0.000697593		TTATCT	2	0.000389105	TAGTCA	2	0.000304925	GACACA	0	0	GGTTTT	0	0		AGACAT	47	0.133144	TTTTGT	21	0.0509709	TAGTAC	4	0.00888889	CGACAG	2	0.000752162		TGACCG	18	0.00411241	TCTGTT	21	0.00577082	ATACAC	1	0.000268312	CACAGT	1
TAGCAG	382	0.11386	CATACA	97	0.103412	CTCACA	7	0.0376344	ACGGCA	6	0.000697593		CATTGG	2	0.000389105	CACCGG	2	0.000304925	GGTTTT	0	0	GGTTTG	0	0		GTGTGG	47	0.133144	TATCGA	21	0.0509709	GGAGCG	4	0.00888889	GGGAAT	2	0.000752162		TTGGAG	18	0.00411241	TGCAAA	21	0.00577082	ATAAAT	1	0.000268312	TGGTGG	1
GTTCTA	382	0.11386	TTCACA	97	0.103412	TTGATC	7	0.0376344	CTAGCT	6	0.000697593		TTATAT	2	0.000389105	TTGGTC	2	0.000304925	GTAACG	0	0	GGTTTC	0	0		CTTTAC	46	0.130312	TTCCGG	21	0.0509709	ATGCGG	4	0.00888889	TCGAAA	2	0.000752162		CTTGGG	18	0.00411241	TTCTCT	21	0.00577082	GGACAA	1	0.000268312	CTTAGC	1
ATAGCG	382	0.11386	CTGTAT	97	0.103412	CTGTCG	7	0.0376344	GCGGGT	6	0.000697593		CTAGGT	2	0.000389105	TTTCGG	2	0.000304925	GTAACC	0	0	CGTCGA	0	0		GTGGAA	46	0.130312	TATAAA	21	0.0509709	AGTTCA	4	0.00888889	GGTGAT	2	0.000752162		CCGGAT	18	0.00411241	TGCACA	21	0.00577082	CGTGTC	1	0.000268312	CCAGGT	1
GTGTCC	382	0.11386	GAGACC	97	0.103412	GCGACG	7	0.0376344	GCTGGC	6	0.000697593		TTACCC	2	0.000389105	TCCTCG	2	0.000304925	AGGCAA	0	0	GTAAAT	0	0		CTGGTC	46	0.130312	GTGATA	21	0.0509709	CTTTCC	4	0.00888889	GTACAT	2	0.000752162		TGGAGG	17	0.00388394	TGGAGC	21	0.00577082	CTACGT	1	0.000268312	CCTGAC	1
CTACCC	381	0.113562	GTACGC	96	0.102345	CTTGCG	7	0.0376344	CTTCAG	6	0.000697593		TACTGA	2	0.000389105	TGTCAC	2	0.000304925	TGATTA	0	0	GTAAAG	0	0		GTTGAG	46	0.130312	TGTGCA	21	0.0509709	GGTGCA	4	0.00888889	GGGTCG	2	0.000752162		TGGCTG	17	0.00388394	GGGACA	21	0.00577082	GGCAAC	1	0.000268312	TCTGGG	1
TTAAAT	381	0.113562	GTTGTA	96	0.102345	TTAATG	7	0.0376344	TTACGA	6	0.000697593		TTACAC	2	0.000389105	TCGACG	2	0.000304925	TTACGA	0	0	GTAAAC	0	0		TGGATC	46	0.130312	TTTCGA	21	0.0509709	GCGACC	4	0.00888889	CTGCGT	2	0.000752162		TTTTTT	17	0.00388394	TGCCAA	21	0.00577082	CCTGCT	1	0.000268312	CCGGCC	1
CTGCGC	381	0.113562	TGTGAC	96	0.102345	CTGTTT	7	0.0376344	GGGCCT	6	0.000697593		TGAGTA	2	0.000389105	CATCCC	2	0.000304925	GGTTGC	0	0	ACTGAC	0	0		TGACGA	46	0.130312	TTTGTC	21	0.0509709	GTGTGC	4	0.00888889	CTGTTT	2	0.000752162		GCCATT	17	0.00388394	TTGCAA	20	0.00549602	GCTTCA	1	0.000268312	CCGGTC	1
GGGACA	381	0.113562	GGACAT	96	0.102345	AGTGCA	6	0.0322581	ATACCG	6	0.000697593		TTACGC	2	0.000389105	CGGTGT	2	0.000304925	TCGCTC	0	0	CCCCGA	0	0		CTGTCC	46	0.130312	GTGGCC	21	0.0509709	TGGAGG	4	0.00888889	AGGACG	2	0.000752162		GGACAT	17	0.00388394	TAGTAG	20	0.00549602	TTACGA	1	0.000268312	ATGCGT	1
GTTCCA	381	0.113562	GTGATA	96	0.102345	TGACTC	6	0.0322581	CTGTTC	6	0.000697593		ATCAGG	2	0.000389105	TCTTCG	2	0.000304925	GGTTCT	0	0	GTACCG	0	0		CTTACA	46	0.130312	TCTCAA	21	0.0509709	ATGCGA	4	0.00888889	ATGTCC	2	0.000752162		TTCACC	17	0.00388394	TACCAA	20	0.00549602	CGGTGT	1	0.000268312	GAGCCG	1
TATTTC	381	0.113562	AGTGCA	96	0.102345	TATCGT	6	0.0322581	CTGAGT	6	0.000697593		TTTAGA	2	0.000389105	ATGACA	2	0.000304925	GGTTTG	0	0	GTACCC	0	0		TAGTTA	46	0.130312	TAGGAA	21	0.0509709	TGTCGT	4	0.00888889	GAGACC	2	0.000752162		TATCGC	17	0.00388394	TGTCCA	20	0.00549602	TAGATG	1	0.000268312	CGGTCG	1
CTATTA	380	0.113264	TGTAAC	95	0.101279	TACCGT	6	0.0322581	GTGCTC	6	0.000697593		TGCGGT	2	0.000389105	AAACTG	2	0.000304925	GGTTTC	0	0	GGGCGC	0	0		TGTTCG	46	0.130312	CCCTTG	20	0.0485437	CACGGG	4	0.00888889	TGACGG	2	0.000752162		TATCCT	16	0.00365547	TATCTT	20	0.00549602	GCCTGG	1	0.000268312	ACATTC	1
CGCGCA	380	0.113264	ATGATC	95	0.101279	CTTTTC	6	0.0322581	CTGGAT	6	0.000697593		TGCGGG	2	0.000389105	CACGGG	2	0.000304925	CCTGCG	0	0	GCCGGA	0	0		ACGACA	46	0.130312	TCGAAA	20	0.0485437	TTTTCC	4	0.00888889	TCGCAT	2	0.000752162		TTGGTG	16	0.00365547	CGCGCT	19	0.00522121	TAGCGG	1	0.000268312	CCTATT	1
TTTAGT	380	0.113264	TGGATA	95	0.101279	TTATGT	6	0.0322581	TCGACC	6	0.000697593		AATTAT	2	0.000389105	TTTAAT	2	0.000304925	GGTTGT	0	0	GTACGG	0	0		TCGTAT	46	0.130312	CTGTCA	20	0.0485437	GTAGAA	4	0.00888889	GTTGGT	2	0.000752162		CCCATT	16	0.00365547	GTGACC	19	0.00522121	TCGAAA	1	0.000268312	GTTTAT	1
GTGGTC	380	0.113264	TACAAT	95	0.101279	TGTTAG	6	0.0322581	CGGGGT	6	0.000697593		TGCTCT	2	0.000389105	TTTGTC	2	0.000304925	CACTGA	0	0	GAACGA	0	0		GGTGAC	46	0.130312	TGTAAA	20	0.0485437	TACCAG	4	0.00888889	TCGCCT	2	0.000752162		GGATTT	16	0.00365547	TGTCCT	19	0.00522121	TCGAAC	1	0.000268312	GTTTCT	1
ATGACG	379	0.112966	GTGACC	95	0.101279	TAGACA	6	0.0322581	GTAGTT	6	0.000697593		ATATCG	2	0.000389105	GACCAT	1	0.000152462	GTACAC	0	0	TCTACG	0	0		TTGCCG	46	0.130312	TATGCA	20	0.0485437	CTACAC	4	0.00888889	TGTTCC	2	0.000752162		TTCCTA	16	0.00365547	TTACAC	19	0.00522121	TCCTTC	1	0.000268312	CAACCT	1
TGGGTT	379	0.112966	GGACAG	95	0.101279	AAGACG	6	0.0322581	GTCACG	6	0.000697593		TGCGTC	2	0.000389105	ACATCA	1	0.000152462	ACCTAC	0	0	GTAATT	0	0		TCGCCG	46	0.130312	GTGTAT	20	0.0485437	TATCAT	4	0.00888889	GGCGCA	2	0.000752162		TTTCTC	15	0.003427	CTTGGG	19	0.00522121	TCGTCT	1	0.000268312	TTCCAG	1
TGTAGT	379	0.112966	CTTTCC	95	0.101279	TTAGCA	6	0.0322581	CGGGGC	6	0.000697593		ATATCC	2	0.000389105	GACAAT	1	0.000152462	GTAATT	0	0	GTAATG	0	0		GTTCCT	46	0.130312	ATTACA	20	0.0485437	TTTCGT	4	0.00888889	CTACTA	2	0.000752162		TAAACC	15	0.003427	GGACGA	19	0.00522121	TCCCGA	1	0.000268312	GTGAAA	1
CGCCGC	378	0.112668	GCTGCA	95	0.101279	TGTCCA	6	0.0322581	TCCACA	6	0.000697593		ACTGTA	2	0.000389105	GGTTCC	1	0.000152462	GTACCG	0	0	GTAATC	0	0		TGGTGA	46	0.130312	GTGTTA	20	0.0485437	TTTATG	4	0.00888889	TATGCG	2	0.000752162		TCTGTT	15	0.003427	ATGCGG	19	0.00522121	TCACGC	1	0.000268312	CACGTC	1
TGTCCA	378	0.112668	TCCCAT	94	0.100213	ATGCGG	6	0.0322581	GTCGCC	6	0.000697593		CGAATC	2	0.000389105	CCCGTG	1	0.000152462	GTACCC	0	0	GACGCA	0	0		TATCGA	46	0.130312	TACCGC	20	0.0485437	CTGGTG	4	0.00888889	GGGTAG	2	0.000752162		TTTATG	14	0.00319854	TAGAGA	19	0.00522121	TACCTG	1	0.000268312	GGCGCG	1
TTCTCT	378	0.112668	TGTGCC	94	0.100213	CTGTCA	6	0.0322581	GTGTTT	6	0.000697593		AATTTT	2	0.000389105	CCCCAC	1	0.000152462	CTGAAA	0	0	GTACAT	0	0		TACCCG	46	0.130312	CTTTTC	19	0.0461165	GTTTCA	4	0.00888889	CTTATA	2	0.000752162		TAGAAG	14	0.00319854	AGACTC	18	0.00494641	TCGGTA	1	0.000268312	CAAGAT	1
GTCGCC	377	0.11237	CTTAAC	94	0.100213	TACCGC	6	0.0322581	GCCGGC	6	0.000697593		TATCTA	2	0.000389105	CCCTTG	1	0.000152462	GTACAT	0	0	GTACAG	0	0		TTACGC	46	0.130312	GGTGCA	19	0.0461165	TTTTTT	3	0.00666667	AGGGCT	2	0.000752162		CAAATA	14	0.00319854	TATCAA	18	0.00494641	GGATGA	1	0.000268312	CAAGGT	1
TGACTC	377	0.11237	GATGCA	93	0.0991471	TTACTT	5	0.0268817	GTCGAT	6	0.000697593		CGAACC	2	0.000389105	AGTGGT	1	0.000152462	GTAAGG	0	0	GTACAC	0	0		TAGAGT	45	0.127479	GTGGTG	19	0.0461165	TTATCT	3	0.00666667	TGTTAT	2	0.000752162		TGTCCT	14	0.00319854	CTTCAC	18	0.00494641	TCCAGT	1	0.000268312	TTATCG	1
TACACG	376	0.112072	TCCTCA	93	0.0991471	GTGGCT	5	0.0268817	CTCTTA	6	0.000697593		CGAACT	2	0.000389105	ACCCAC	1	0.000152462	GTAAGC	0	0	ATCCAC	0	0		GTGGTA	45	0.127479	GTGTGG	19	0.0461165	TTCAAT	3	0.00666667	GTACAC	2	0.000752162		AAGAAC	13	0.00297007	ATGCGA	17	0.00467161	ATAGAC	1	0.000268312	CACAAC	1
ATGGCG	376	0.112072	TCGCCG	92	0.098081	TATCTA	5	0.0268817	CGTGGC	6	0.000697593		CTAGTT	2	0.000389105	TACCTA	1	0.000152462	GTGCAT	0	0	GTCGCC	0	0		GTGATA	45	0.127479	TAGGTT	19	0.0461165	TTTTGT	3	0.00666667	TGTCGT	2	0.000752162		CTGCAC	13	0.00297007	TTGGAG	17	0.00467161	GGACTC	1	0.000268312	CACAAA	1
CTGCTC	375	0.111773	CGTGAC	92	0.098081	TTAACG	5	0.0268817	TACCTT	6	0.000697593		AATAGG	2	0.000389105	CCCATG	1	0.000152462	AGGCGA	0	0	CATCGA	0	0		TATTAA	45	0.127479	TGGTTG	19	0.0461165	TTTCTA	3	0.00666667	CTAGCC	2	0.000752162		TTCCGC	13	0.00297007	TTTATG	17	0.00467161	CCTCTT	1	0.000268312	CAAAGC	1
TTACCT	375	0.111773	TTCTAC	92	0.098081	TGTTCC	5	0.0268817	GCTGGG	6	0.000697593		TGGGTT	2	0.000389105	CCTGCT	1	0.000152462	AAGTGA	0	0	GTCGAT	0	0		TAGACC	45	0.127479	GATGAC	19	0.0461165	ATACAA	3	0.00666667	CTAGAT	2	0.000752162		TGCACA	13	0.00297007	AAGAAC	17	0.00467161	GCTTTC	1	0.000268312	ATTCCA	1
TTTCCA	375	0.111773	TACCAT	91	0.0970149	TTACGT	5	0.0268817	ATCATC	6	0.000697593		CCTGAC	2	0.000389105	CCCAGG	1	0.000152462	GTAATC	0	0	GTCGAG	0	0		TGACAG	45	0.127479	TGTCGC	19	0.0461165	ATACAT	3	0.00666667	TGTCTT	2	0.000752162		TCGCGA	13	0.00297007	TGTCAA	17	0.00467161	TTGGAG	1	0.000268312	ATTGTA	1
GGCGCA	375	0.111773	CTTTAC	91	0.0970149	GTGGAG	5	0.0268817	CGTCTC	6	0.000697593		TGTAAG	2	0.000389105	GAATTT	1	0.000152462	AAAGCT	0	0	GTCGGC	0	0		TTTTTA	45	0.127479	TGTGCG	19	0.0461165	ATGCGT	3	0.00666667	AGACTT	2	0.000752162		GTAGCG	13	0.00297007	TTTCAG	17	0.00467161	GCTCTT	1	0.000268312	CTCTCG	1
AATGCG	375	0.111773	ATGCTA	91	0.0970149	TTCCGG	5	0.0268817	TCGGCT	6	0.000697593		CCTCAG	2	0.000389105	CCCGCC	1	0.000152462	GTAAGT	0	0	TGATGA	0	0		CGACAG	45	0.127479	CTTTCG	19	0.0461165	CGCCCA	3	0.00666667	TCTCCT	2	0.000752162		CTAGAA	13	0.00297007	AGACTA	17	0.00467161	TTTGGG	1	0.000268312	CCAACC	1
GTACCA	374	0.111475	TACCAC	91	0.0970149	GTAGCT	5	0.0268817	TATGCC	6	0.000697593		TGGTGT	2	0.000389105	CCCTTC	1	0.000152462	GAGCCT	0	0	GTCGCT	0	0		TATCTA	45	0.127479	TCGCCG	19	0.0461165	GTTCCC	3	0.00666667	TTTGTA	2	0.000752162		TCCTAG	13	0.00297007	GTTGAC	17	0.00467161	CGTACT	1	0.000268312	CATTCC	1
GTTTCT	374	0.111475	GAGACA	91	0.0970149	CTCGCA	5	0.0268817	TACACA	6	0.000697593		TGGGGT	2	0.000389105	GACTCG	1	0.000152462	GTCCTT	0	0	GTCGCG	0	0		TGGTTG	44	0.124646	TATCAC	19	0.0461165	TCGCCC	3	0.00666667	GTCGAC	2	0.000752162		TAGTAG	13	0.00297007	GGCGCC	17	0.00467161	ACGACA	1	0.000268312	CGCGGG	1
ATGTCC	374	0.111475	CTACTA	91	0.0970149	ATTGAC	5	0.0268817	TTGGGT	6	0.000697593		CCTGTT	2	0.000389105	GAGCTA	1	0.000152462	GTCCTG	0	0	CCGGAA	0	0		CAGACA	44	0.124646	GAGACT	19	0.0461165	TGTTAG	3	0.00666667	CGACAC	2	0.000752162		CGCCCA	13	0.00297007	GATGGG	16	0.00439681	TAGTTA	1	0.000268312	CACTGA	1
TTAGCT	374	0.111475	GTGAAT	90	0.0959488	CTAGTC	5	0.0268817	GTAGCA	6	0.000697593		CGAGCT	2	0.000389105	ATACTA	1	0.000152462	TTAGTA	0	0	CCCTGG	0	0		ATGATC	44	0.124646	TCGCCC	19	0.0461165	TCGCTT	3	0.00666667	GTGGAA	2	0.000752162		TGTATG	12	0.0027416	CTTGGC	16	0.00439681	GTGTCC	1	0.000268312	TTCACT	1
GTGACC	373	0.111177	GTTACC	90	0.0959488	TTGACT	5	0.0268817	TGTTGT	6	0.000697593		GCAGCA	2	0.000389105	CTTTGG	1	0.000152462	GGAAGC	0	0	GTCCGT	0	0		GTGAAT	44	0.124646	TGTCCT	18	0.0436893	GGGCAC	3	0.00666667	TTCATG	2	0.000752162		TGAAAT	12	0.0027416	TGCTCA	16	0.00439681	CATATC	1	0.000268312	ATTCGA	1
TGTGCG	373	0.111177	TTACGG	90	0.0959488	TTGCAC	5	0.0268817	TGCCGG	6	0.000697593		AATCCG	2	0.000389105	GGTGCA	1	0.000152462	GTCGAT	0	0	TGAAAA	0	0		ATTGAG	44	0.124646	GTAGAA	18	0.0436893	GGGCAA	3	0.00666667	CGTGTC	2	0.000752162		TGGTCC	12	0.0027416	ATTGAG	16	0.00439681	TATGCT	1	0.000268312	ATTCAG	1
TGGCAC	373	0.111177	TGTACG	90	0.0959488	TACGCA	5	0.0268817	ATTTTT	6	0.000697593		ATAATA	2	0.000389105	CCCACC	1	0.000152462	GTCGAG	0	0	GTCGAC	0	0		TTGGGG	44	0.124646	ATGCGG	18	0.0436893	TCGAAA	3	0.00666667	GGGCAT	2	0.000752162		TACCGT	12	0.0027416	TCGCGA	16	0.00439681	AGTAGG	1	0.000268312	CGTCGC	1
ATACAT	373	0.111177	TGTATA	90	0.0959488	TACAAC	5	0.0268817	GTGTTG	6	0.000697593		TTTAGG	2	0.000389105	ATGAGA	1	0.000152462	GTCCGC	0	0	TTAATA	0	0		GGTGCA	44	0.124646	TGACTC	18	0.0436893	CTTACG	3	0.00666667	TGTTAG	2	0.000752162		CGATGC	12	0.0027416	GGCCCA	15	0.00412201	GTACAC	1	0.000268312	CGTCCC	1
TATTTA	373	0.111177	TAGATC	90	0.0959488	AATGCG	5	0.0268817	TCTGGG	6	0.000697593		GATGCC	2	0.000389105	CCCAAT	1	0.000152462	GGTATT	0	0	GTCCTT	0	0		TCGAAA	44	0.124646	TGTTCG	18	0.0436893	TCGCAG	3	0.00666667	TTTTCC	2	0.000752162		CTGGAG	12	0.0027416	TTCCTC	15	0.00412201	CGGGGG	1	0.000268312	CGGGAC	1
GTCGCT	372	0.110879	TAGAAC	89	0.0948827	TATCAC	5	0.0268817	TACGTA	6	0.000697593		CAACCA	2	0.000389105	GAAGTC	1	0.000152462	GCCACA	0	0	GTCCTG	0	0		GAGACG	44	0.124646	GTTGGC	18	0.0436893	CCGCGC	3	0.00666667	AGACAC	2	0.000752162		TGGGGC	12	0.0027416	TGTAAT	15	0.00412201	GAAGAG	1	0.000268312	ATCCAT	1
TTAGTA	372	0.110879	TAGATA	89	0.0948827	CTACCG	5	0.0268817	GTGTCG	6	0.000697593		TAGATA	2	0.000389105	CACGTA	1	0.000152462	GGCGCA	0	0	GTCTCC	0	0		TGGATA	44	0.124646	TCGTGC	18	0.0436893	TGACCT	3	0.00666667	TTGGGT	2	0.000752162		GTGTAC	12	0.0027416	AGGTCG	15	0.00412201	GTTTCA	1	0.000268312	CGTCTC	1
GTATAT	372	0.110879	TGGCTA	88	0.0938166	ATGTGT	5	0.0268817	TTTAAG	6	0.000697593		AAAGGG	2	0.000389105	GAACGT	1	0.000152462	GTCCTC	0	0	CGATTG	0	0		TGGAAT	44	0.124646	CTTGGA	18	0.0436893	ATCGAG	3	0.00666667	GGGCGG	2	0.000752162		CTGACT	12	0.0027416	TGCATT	15	0.00412201	CTAACA	1	0.000268312	CGAGCG	1
GCCACA	371	0.110581	GTGCGC	88	0.0938166	CTACGG	5	0.0268817	GTGAAC	6	0.000697593		ATTGCT	2	0.000389105	GAAGAG	1	0.000152462	ACTTGT	0	0	GTCTAT	0	0		TGACAC	44	0.124646	CTTTCC	18	0.0436893	CTGCAA	3	0.00666667	CTTTAG	2	0.000752162		ATGCGA	12	0.0027416	TTACTT	15	0.00412201	ACATCG	1	0.000268312	CGGGAA	1
TGTCCC	371	0.110581	TAGGCA	88	0.0938166	TTTTAG	5	0.0268817	TTTAGG	6	0.000697593		TCAATA	2	0.000389105	ACAATA	1	0.000152462	GTCCGT	0	0	GTCTAG	0	0		ATATCG	44	0.124646	CGCGCC	18	0.0436893	CAGACG	3	0.00666667	TTCTAA	2	0.000752162		TTTGTG	12	0.0027416	CAGGCC	15	0.00412201	GTAACA	1	0.000268312	ATGAAA	1
TGGTCA	371	0.110581	TTGTTA	88	0.0938166	TACTCA	5	0.0268817	TTATTC	6	0.000697593		GTGCCG	2	0.000389105	CCCCTG	1	0.000152462	GTCCGG	0	0	GTCTGC	0	0		TTTCTG	44	0.124646	CCACCT	18	0.0436893	GTGGAG	3	0.00666667	CAGACA	2	0.000752162		ATGGAC	12	0.0027416	TCAGGC	15	0.00412201	CTGATG	1	0.000268312	TGCAAT	1
TTGGGC	370	0.110283	TGGCGG	88	0.0938166	CAGCGG	5	0.0268817	CTATCA	6	0.000697593		ATTCTA	2	0.000389105	GACAGG	1	0.000152462	GCTAAA	0	0	GGGACA	0	0		TTACGT	43	0.121813	CTGTCC	18	0.0436893	GTTACC	3	0.00666667	TATATA	2	0.000752162		ATCCAC	12	0.0027416	AGGACA	15	0.00412201	TCATAG	1	0.000268312	CGGTAC	1
TATCGC	370	0.110283	AAGACG	87	0.0927505	TGTCAT	5	0.0268817	TGCGGC	6	0.000697593		AACACG	2	0.000389105	CCCCGG	1	0.000152462	AAGGCG	0	0	GTCTCT	0	0		CTTGGA	43	0.121813	GGTGAC	18	0.0436893	TACCAT	3	0.00666667	TATCTA	2	0.000752162		ATAGAC	11	0.00251314	ATTGTG	15	0.00412201	TGAAGG	1	0.000268312	CGAATG	1
CTGGAT	370	0.110283	TTCAAG	87	0.0927505	GTACGC	5	0.0268817	GCATGA	6	0.000697593		GCGCCA	2	0.000389105	GACGGT	1	0.000152462	GTCGTT	0	0	GTCTCG	0	0		CTAGAT	43	0.121813	ATTGAG	18	0.0436893	TACCAA	3	0.00666667	TAGTGT	2	0.000752162		TGCAAA	11	0.00251314	TCCATG	15	0.00412201	GTGTTA	1	0.000268312	CCTCAT	1
AGACAC	370	0.110283	TAGTCA	87	0.0927505	CTGCAT	5	0.0268817	TGGAAG	6	0.000697593		TTGTAC	2	0.000389105	GACGGC	1	0.000152462	GTCGTG	0	0	GTGTTA	0	0		TACCAC	43	0.121813	GTGCTC	18	0.0436893	GTTTTC	3	0.00666667	TAGTTA	2	0.000752162		TATCAC	11	0.00251314	TGTTAT	15	0.00412201	CGGCGG	1	0.000268312	CTACGC	1
GGGCAC	370	0.110283	TATTAT	86	0.0916844	TCGCCG	5	0.0268817	TGGCTG	6	0.000697593		CCCCAC	2	0.000389105	CCCACT	1	0.000152462	GTCTCC	0	0	AGCACA	0	0		GTAGAC	43	0.121813	TTTATG	18	0.0436893	TATTCT	3	0.00666667	TAGTTT	2	0.000752162		CTTGGC	11	0.00251314	GTGTGC	14	0.00384721	CATGAA	1	0.000268312	CGTTTA	1
TGTATG	369	0.109985	TCCACG	86	0.0916844	GTTCAC	5	0.0268817	TGGCTT	6	0.000697593		TTGGGT	2	0.000389105	GACACC	1	0.000152462	TCCAGA	0	0	GTCGGT	0	0		CTATCA	43	0.121813	TCCACG	17	0.0412621	TGTCAA	3	0.00666667	ATTGCT	2	0.000752162		TCCACT	11	0.00251314	TAGAGT	14	0.00384721	TCACCG	1	0.000268312	CTAGCA	1
CGACAG	369	0.109985	AGACAG	86	0.0916844	GGACAC	5	0.0268817	TCGTGG	6	0.000697593		CCAGGG	2	0.000389105	CCCTCC	1	0.000152462	CGACTA	0	0	GTCGGG	0	0		CTACCA	43	0.121813	CTACAC	17	0.0412621	GGTACT	3	0.00666667	ATGGCG	2	0.000752162		TGCCCG	11	0.00251314	CCGATT	14	0.00384721	GTTACC	1	0.000268312	CTAGAC	1
AAGCAG	369	0.109985	CTATCC	85	0.0906183	AGCGTC	4	0.0215054	TTCCAC	6	0.000697593		TTTTCC	2	0.000389105	GCTCCA	1	0.000152462	GTCTAG	0	0	GTCTAC	0	0		TTGGGT	43	0.121813	CTAGTA	17	0.0412621	GTGTGA	3	0.00666667	CCCCCC	2	0.000752162		TTTGGT	11	0.00251314	TCCACT	14	0.00384721	CCGTCT	1	0.000268312	CCACTG	1
CGGCGC	369	0.109985	CACACA	85	0.0906183	CTTCAG	4	0.0215054	AATAGC	6	0.000697593		GATTCG	2	0.000389105	GAACGC	1	0.000152462	GTCGGC	0	0	CACGAG	0	0		CTGTTT	43	0.121813	GTGTGT	17	0.0412621	TATCGT	3	0.00666667	TTTAAG	2	0.000752162		GCGCCG	11	0.00251314	ATGGAC	14	0.00384721	ACTATG	1	0.000268312	ATCACT	1
ATGCTG	369	0.109985	TTAGAC	85	0.0906183	ATGTAC	4	0.0215054	TTCCTG	6	0.000697593		AAAATG	2	0.000389105	GACAGT	1	0.000152462	GAACTA	0	0	ACCTGA	0	0		TATCTG	43	0.121813	TAGAGT	17	0.0412621	TATCTA	3	0.00666667	GTGCCC	2	0.000752162		TCCATG	11	0.00251314	TTTAAG	14	0.00384721	TCAAAG	1	0.000268312	ATTATT	1
TCCCGC	368	0.109687	TGGAAG	85	0.0906183	GTGTTA	4	0.0215054	TGGTAG	6	0.000697593		TTTCTC	2	0.000389105	TCATTA	1	0.000152462	GTCGCT	0	0	GTCGTG	0	0		TTGGGC	43	0.121813	CTGCAG	17	0.0412621	CCGACA	3	0.00666667	ACCCCA	2	0.000752162		TCCATC	11	0.00251314	TGTTCT	14	0.00384721	TATCAT	1	0.000268312	CTAATT	1
TCCACA	368	0.109687	TACCAG	85	0.0906183	ATACAT	4	0.0215054	GTGCGT	6	0.000697593		CTGATA	2	0.000389105	GAACAT	1	0.000152462	GTCGCG	0	0	GGCAAA	0	0		ATGCCA	43	0.121813	AAGACG	17	0.0412621	GTGTGG	3	0.00666667	TAGAAC	2	0.000752162		CTTTAT	11	0.00251314	TTTCGG	14	0.00384721	GTAGAT	1	0.000268312	AGACAG	1
TATTGT	368	0.109687	TTGGCT	84	0.0895522	ATTTAC	4	0.0215054	ATTTAT	6	0.000697593		TTTTCT	2	0.000389105	GACCTT	1	0.000152462	GTCGTC	0	0	CGCCCA	0	0		TTGGCA	43	0.121813	TAGAGC	17	0.0412621	ATTGTG	3	0.00666667	TACCGT	2	0.000752162		GTGGAT	10	0.00228467	TACATG	14	0.00384721	GTTTCT	1	0.000268312	CTAAGT	1
TGTCCT	367	0.109389	TAGGCC	83	0.0884861	AGTGCG	4	0.0215054	TTCCTT	6	0.000697593		GATGTC	2	0.000389105	GACTCT	1	0.000152462	TCGGTA	0	0	CCCCTA	0	0		GTGTAA	43	0.121813	TACCAG	17	0.0412621	CCGACG	3	0.00666667	CACACG	2	0.000752162		TGCCTA	10	0.00228467	TGTATG	13	0.00357241	TAGCAC	1	0.000268312	ATGACC	1
TTGTTT	367	0.109389	CTTACT	83	0.0884861	TCCTCA	4	0.0215054	CATTCA	6	0.000697593		TTTCAG	2	0.000389105	GACCTA	1	0.000152462	GCCAAA	0	0	GTCAGG	0	0		TGTCAC	43	0.121813	GTTCCT	17	0.0412621	CGACAA	3	0.00666667	GTTCAA	2	0.000752162		TGCATT	10	0.00228467	TACTCA	13	0.00357241	GAGGTG	1	0.000268312	TGCGTT	1
ATGCGC	366	0.109091	GCTGTG	83	0.0884861	TATTTA	4	0.0215054	TGTCAT	6	0.000697593		AAAGAT	2	0.000389105	GCCTTG	1	0.000152462	GTCGGG	0	0	GTAGTA	0	0		GTGGTT	42	0.11898	GTGGTT	17	0.0412621	TTCCTG	3	0.00666667	TGGCCC	2	0.000752162		TGCTCA	10	0.00228467	GCCTGA	13	0.00357241	TCCTGC	1	0.000268312	TGGGTT	1
AGTACA	366	0.109091	TAGAAG	83	0.0884861	GGGACG	4	0.0215054	CAAGCA	6	0.000697593		TTTATG	2	0.000389105	CATCTG	1	0.000152462	GTCAAC	0	0	TCCGCG	0	0		TACACG	42	0.11898	GGACAC	17	0.0412621	GTTTCG	3	0.00666667	TAGGCA	2	0.000752162		GTGTAT	10	0.00228467	CTGACT	13	0.00357241	TAAGAC	1	0.000268312	TAGAGC	1
GTACGC	366	0.109091	TTTGGC	83	0.0884861	CTTCCT	4	0.0215054	ATGCTG	6	0.000697593		CCATTC	2	0.000389105	CACACC	1	0.000152462	GCTGCT	0	0	GTCACT	0	0		TCGCTA	42	0.11898	TTACAC	17	0.0412621	ATTTAC	3	0.00666667	TACTTA	2	0.000752162		CTGGCC	10	0.00228467	CTGCAT	13	0.00357241	GCTCCG	1	0.000268312	CGACAA	1
GTCACG	366	0.109091	TAGAAT	83	0.0884861	TTCATT	4	0.0215054	TAGTAG	6	0.000697593		CCACGG	2	0.000389105	CATGAT	1	0.000152462	GTATTT	0	0	GTATTG	0	0		TAGACA	42	0.11898	TAGTTC	17	0.0412621	AGACAT	3	0.00666667	TACTCA	2	0.000752162		GCCAAA	10	0.00228467	TTACGT	13	0.00357241	CAGAGT	1	0.000268312	CGACTA	1
CTCACG	366	0.109091	TATATC	82	0.08742	TAGTGA	4	0.0215054	GACATA	5	0.000581328		GATGTT	2	0.000389105	CATCGA	1	0.000152462	GTATTG	0	0	GTATTC	0	0		TGTCCT	42	0.11898	TATCGG	17	0.0412621	GTGCTA	3	0.00666667	TTGGGC	2	0.000752162		TGACCC	10	0.00228467	TGCGCA	13	0.00357241	GGAAGG	1	0.000268312	ATGCGA	1
CTCCTC	365	0.108793	TAGAGA	82	0.08742	TCGCTG	4	0.0215054	ATCAGC	5	0.000581328		AAAACA	2	0.000389105	GATTTG	1	0.000152462	ATGCGA	0	0	GACACG	0	0		TAGATC	42	0.11898	TTTTTT	16	0.038835	GTAGTA	3	0.00666667	GGTGTG	2	0.000752162		CTTCAC	10	0.00228467	TGACCC	13	0.00357241	CCCTTG	1	0.000268312	CTGGAG	1
CTTCTA	365	0.108793	ACGACA	82	0.08742	GTGTCG	4	0.0215054	CTGTTA	5	0.000581328		GTCCTG	2	0.000389105	CATCAG	1	0.000152462	GAACGG	0	0	GTATGT	0	0		TAGCCT	42	0.11898	TTACAG	16	0.038835	CTTGGT	3	0.00666667	TAGTCC	2	0.000752162		GTGCTT	10	0.00228467	TTGCGA	13	0.00357241	GGTTCT	1	0.000268312	ATCTTG	1
ATGTGT	365	0.108793	TGCCAT	82	0.08742	TTTTGA	4	0.0215054	GGGCAG	5	0.000581328		AACTTC	2	0.000389105	ATCATG	1	0.000152462	GTCAAT	0	0	GTCAAG	0	0		TACACT	42	0.11898	GTACAT	16	0.038835	CTTCAA	3	0.00666667	CTCGCG	2	0.000752162		TATCTT	10	0.00228467	TATCCC	12	0.00329761	CAGTCA	1	0.000268312	ATGATC	1
CTGGCA	365	0.108793	CGTGCG	81	0.0863539	ATGTCA	4	0.0215054	CACCGC	5	0.000581328		AACTTG	2	0.000389105	GATCTT	1	0.000152462	CGCGGA	0	0	GTCAAC	0	0		CGATGC	42	0.11898	CCGACG	16	0.038835	GGGCAG	3	0.00666667	TGTTCG	2	0.000752162		ATTGAG	10	0.00228467	TGCATA	12	0.00329761	AAGTGG	1	0.000268312	TGGAAG	1
CTACCA	365	0.108793	CAGACG	81	0.0863539	GTGCTG	4	0.0215054	ATGTTT	5	0.000581328		CCCTAT	2	0.000389105	CATCCG	1	0.000152462	GTATGC	0	0	GTGTGT	0	0		CTTTCC	42	0.11898	CACTCC	16	0.038835	TGACGT	3	0.00666667	CCCGGT	2	0.000752162		CTACTG	10	0.00228467	TCCACA	12	0.00329761	GTCTGG	1	0.000268312	CGCTTA	1
TTCTGC	364	0.108495	ATGCCT	81	0.0863539	AATGTC	4	0.0215054	CGTTGG	5	0.000581328		CTATCA	2	0.000389105	GATGCG	1	0.000152462	GGATCC	0	0	GTATTT	0	0		TACCCT	41	0.116147	GTCACA	16	0.038835	CTTTAT	3	0.00666667	AAGGCG	2	0.000752162		GTGCTA	10	0.00228467	GCGACG	12	0.00329761	TAAAAT	1	0.000268312	TGAGAG	1
TGTGAT	364	0.108495	TAGCAT	81	0.0863539	GTACCA	4	0.0215054	GGGACG	5	0.000581328		AACTGT	2	0.000389105	AGGACG	1	0.000152462	GTATCT	0	0	GATCAA	0	0		TTCTTT	41	0.116147	CGACAG	16	0.038835	TGACTA	3	0.00666667	TAGGAT	2	0.000752162		GGTGCA	10	0.00228467	CCCATT	12	0.00329761	TAAACT	1	0.000268312	CGACTT	1
ATCGCA	364	0.108495	GCCACA	81	0.0863539	GTACTT	4	0.0215054	GGCGAG	5	0.000581328		TTCCGG	2	0.000389105	CATGCG	1	0.000152462	GTATCG	0	0	GTCCCC	0	0		TACACA	41	0.116147	CTTCCT	16	0.038835	CTGCAC	3	0.00666667	GTGGTA	2	0.000752162		TGTCAA	10	0.00228467	GCGACT	12	0.00329761	CCTCGT	1	0.000268312	GTGTGG	1
TTGGGG	363	0.108197	CTGTTG	81	0.0863539	TATCGG	4	0.0215054	GTCAGC	5	0.000581328		CATTTC	2	0.000389105	GATGGG	1	0.000152462	GTATTC	0	0	GCTATT	0	0		ATGCCG	41	0.116147	CTTCAA	16	0.038835	TTGGGC	3	0.00666667	GTCACA	2	0.000752162		TGTGCC	10	0.00228467	ATGCGT	12	0.00329761	GGTTGC	1	0.000268312	AGAGGG	1
TAACTT	363	0.108197	TGACGA	80	0.0852878	CGTGCG	4	0.0215054	GGCATC	5	0.000581328		ACAGCA	2	0.000389105	GTCATA	1	0.000152462	TGCTTA	0	0	AAGTTA	0	0		GTGAAC	41	0.116147	ATTGTT	16	0.038835	CTGCAG	3	0.00666667	ATTGTT	2	0.000752162		GCGACG	9	0.0020562	AGTACG	12	0.00329761	GTTTTT	1	0.000268312	GCCCCG	1
CTAGCC	362	0.107899	TCGTCT	80	0.0852878	TTGGGC	4	0.0215054	TCAGAG	5	0.000581328		CCTGGG	2	0.000389105	GATGCT	1	0.000152462	TTACAA	0	0	GTCCGG	0	0		CTAGAC	41	0.116147	TTACGT	16	0.038835	CCGCAG	3	0.00666667	GTAGCA	2	0.000752162		CTGAAT	9	0.0020562	TAGAAT	12	0.00329761	GTCTCA	1	0.000268312	CGCCAT	1
TGGCCG	362	0.107899	GAGCGC	79	0.0842217	CGCTGC	4	0.0215054	TGGTTG	5	0.000581328		ATCTGA	2	0.000389105	GATGGC	1	0.000152462	AATGTA	0	0	GTCCGC	0	0		ATGGAC	41	0.116147	CTGTTC	16	0.038835	TGGGAA	3	0.00666667	TTATTT	2	0.000752162		GGACGA	9	0.0020562	TAGTCC	12	0.00329761	CCGCAT	1	0.000268312	TGGTTC	1
GTTTTT	362	0.107899	ATGACT	79	0.0842217	CGTGAC	4	0.0215054	GGATAG	5	0.000581328		GCCACT	2	0.000389105	GTGCTG	1	0.000152462	GATGCA	0	0	AATGCT	0	0		CTGCGT	41	0.116147	GTTACT	16	0.038835	CTGCAT	3	0.00666667	TAGTGC	2	0.000752162		TTCCTG	9	0.0020562	TGTAAA	12	0.00329761	TATCTG	1	0.000268312	CGCGCT	1
TGCACA	362	0.107899	TACTAC	79	0.0842217	TTGGGG	4	0.0215054	GTCCGC	5	0.000581328		AAGAGT	2	0.000389105	CAGTAT	1	0.000152462	CTAATC	0	0	GTCCCT	0	0		CTTTGC	41	0.116147	CTCTCT	15	0.0364078	CTGTTC	3	0.00666667	GTATAC	2	0.000752162		GCGCGG	9	0.0020562	GTGTAA	12	0.00329761	CCGAGC	1	0.000268312	AACCTG	1
GTTCTG	361	0.107601	ATACAT	79	0.0842217	TTTCTG	4	0.0215054	TTATCC	5	0.000581328		CTTTGT	2	0.000389105	CAGTAG	1	0.000152462	GTCATT	0	0	GTCATG	0	0		CTGCAA	41	0.116147	GTAGAT	15	0.0364078	CTTCCG	3	0.00666667	GTAGCT	2	0.000752162		TATCTA	9	0.0020562	GTGTAC	12	0.00329761	CGCTCG	1	0.000268312	TCGCTA	1
TTTATG	361	0.107601	AGACAT	79	0.0842217	TTTTGT	4	0.0215054	ATTTCT	5	0.000581328		CCCCTG	2	0.000389105	GCAGCC	1	0.000152462	GTCATG	0	0	GTCATC	0	0		ATGACA	41	0.116147	TTCATT	15	0.0364078	ACTAGC	3	0.00666667	TACCAC	2	0.000752162		GGTTGG	9	0.0020562	GTGGAT	12	0.00329761	GTCTTT	1	0.000268312	TCCCGT	1
TGACAC	361	0.107601	TTTAGT	79	0.0842217	CTGTTC	4	0.0215054	TTATAG	5	0.000581328		TGTTCA	2	0.000389105	GCAGCT	1	0.000152462	GTCCCC	0	0	GTGTAT	0	0		CCACCT	40	0.113314	CCGCGC	15	0.0364078	TCCACG	3	0.00666667	ATGACG	2	0.000752162		GGACCA	9	0.0020562	GTGCTA	12	0.00329761	GTGAAC	1	0.000268312	TCCATC	1
ATGTCA	361	0.107601	ATGAAT	78	0.0831557	TTTTGG	3	0.016129	TGGTGT	5	0.000581328		AACCCG	2	0.000389105	GCATAC	1	0.000152462	TATAAT	0	0	GTCAGT	0	0		TGGAAC	40	0.113314	CTGCAT	15	0.0364078	TGTGCT	2	0.00444444	GGGTTT	2	0.000752162		GTTACT	9	0.0020562	GTGCTC	12	0.00329761	TACTTG	1	0.000268312	TCCAAT	1
GGACAC	360	0.107303	GTTGCC	78	0.0831557	TTTTTC	3	0.016129	AGACTA	5	0.000581328		GCTCTT	2	0.000389105	CAGGCT	1	0.000152462	GTCCAT	0	0	TCTCTA	0	0		GGGACG	40	0.113314	TGTTAC	15	0.0364078	GGACAC	2	0.00444444	TTAAAT	2	0.000752162		TATCCG	9	0.0020562	TGGTTG	12	0.00329761	TAGTGT	1	0.000268312	TCGCGT	1
CTTGGG	360	0.107303	TAGGAC	78	0.0831557	TTTTTT	3	0.016129	TGGTTT	5	0.000581328		TTGGAG	2	0.000389105	TCCATG	1	0.000152462	GTCCAG	0	0	CGATAA	0	0		GTGACT	40	0.113314	GGGCGC	15	0.0364078	TTCCGA	2	0.00444444	ATGGAG	2	0.000752162		CCATCT	9	0.0020562	CGATGC	12	0.00329761	GTCTGT	1	0.000268312	TCTGGT	1
GTGCGC	360	0.107303	TCGACG	77	0.0820896	TTTGGT	3	0.016129	TGCCAC	5	0.000581328		AACATT	2	0.000389105	CAGGGC	1	0.000152462	GTCAGC	0	0	CCAGTG	0	0		CTTCAA	40	0.113314	GTGCTG	15	0.0364078	GTGATT	2	0.00444444	AAGCGG	2	0.000752162		ATTGTG	9	0.0020562	CGGTAG	12	0.00329761	TGATAG	1	0.000268312	TCCCTA	1
CTGTCC	360	0.107303	CTTCTA	77	0.0820896	AGGACG	3	0.016129	CGGGGG	5	0.000581328		AAGACA	2	0.000389105	GCAAAC	1	0.000152462	CAACGA	0	0	GTCATT	0	0		AGACGC	40	0.113314	TTACTA	15	0.0364078	GCTGAT	2	0.00444444	TACCAA	2	0.000752162		CTTTCA	9	0.0020562	TATCGT	11	0.00302281	CCTAGG	1	0.000268312	TCAGGA	1
TCGTCG	360	0.107303	TATAAT	77	0.0820896	GTGTCT	3	0.016129	TGTTAC	5	0.000581328		TTCTCC	2	0.000389105	GCACAT	1	0.000152462	GTCACT	0	0	GAGTCC	0	0		CGACAC	40	0.113314	CGGACA	15	0.0364078	CTACCA	2	0.00444444	GTGAGT	2	0.000752162		TACGAC	9	0.0020562	TATCAC	11	0.00302281	GCATCG	1	0.000268312	CCGTTA	1
TGCGTG	359	0.107004	GAGACG	77	0.0820896	TACTCT	3	0.016129	GGGGAG	5	0.000581328		TTCTAT	2	0.000389105	GCTATA	1	0.000152462	GTCACG	0	0	GCAAGG	0	0		CTGCAG	40	0.113314	ATGCGA	15	0.0364078	GTTTCT	2	0.00444444	TTCAAT	2	0.000752162		TCAGGC	9	0.0020562	TTTGGT	11	0.00302281	CCCGTT	1	0.000268312	CCGATG	1
TGTGTT	359	0.107004	TGGCGT	76	0.0810235	TATATC	3	0.016129	ATGTCC	5	0.000581328		AACGCG	2	0.000389105	GCAACT	1	0.000152462	GTCATC	0	0	AGCTCA	0	0		TCGCTC	40	0.113314	GTACAA	14	0.0339806	TAGAGA	2	0.00444444	TGTTTG	2	0.000752162		GTGCCT	9	0.0020562	GTGATA	11	0.00302281	GGCTTG	1	0.000268312	TATTCT	1
CAGCGC	359	0.107004	GTGTTG	76	0.0810235	TGGGCG	3	0.016129	GTAATA	5	0.000581328		ATCTAT	2	0.000389105	AGTGAT	1	0.000152462	TTCGGT	0	0	AACGTA	0	0		CTGCAT	40	0.113314	TATCTC	14	0.0339806	TTCATA	2	0.00444444	ATGAAT	2	0.000752162		GATTCA	9	0.0020562	CTTCCA	11	0.00302281	GTCAAC	1	0.000268312	TCAGAC	1
TAGAGC	359	0.107004	TGCACG	76	0.0810235	TGCACG	3	0.016129	TGGGTA	5	0.000581328		TTCGTT	2	0.000389105	GCACGG	1	0.000152462	GTCAGT	0	0	GAGTGC	0	0		CTGACC	39	0.110482	TGTTAG	14	0.0339806	CTCGCC	2	0.00444444	TATTCT	2	0.000752162		TGTAAA	9	0.0020562	GTGCCC	11	0.00302281	CAGGCC	1	0.000268312	CATTCG	1
ATGCGA	359	0.107004	ATTGCA	76	0.0810235	TCGCCC	3	0.016129	TGTCGC	5	0.000581328		TTCTTT	2	0.000389105	GCACGT	1	0.000152462	GTCAGG	0	0	TTAAAC	0	0		TGGTAA	39	0.110482	TTCTCT	14	0.0339806	TAGGCC	2	0.00444444	TATCGA	2	0.000752162		TTCTTG	9	0.0020562	CTGGAG	11	0.00302281	CCAAGG	1	0.000268312	GGGATT	1
CGGCAG	359	0.107004	AAGACT	75	0.0799574	TTCAAC	3	0.016129	TGACTA	5	0.000581328		CAGACA	2	0.000389105	TGGCCG	1	0.000152462	TTTCAA	0	0	GAGTCT	0	0		TGACTA	39	0.110482	TGTCGT	14	0.0339806	ATTACA	2	0.00444444	GTGACC	2	0.000752162		TATCGT	9	0.0020562	CAAATA	11	0.00302281	CCCGCC	1	0.000268312	TTCCCC	1
ATGCGG	358	0.106706	TGCACT	75	0.0799574	TTCTCG	3	0.016129	TTAATA	5	0.000581328		AAAATC	2	0.000389105	CAGTTC	1	0.000152462	GAGGTT	0	0	GAGTCG	0	0		GTTACC	39	0.110482	GTGTCT	14	0.0339806	GTTGGC	2	0.00444444	TACCAT	2	0.000752162		TTCTAT	9	0.0020562	AGCACC	11	0.00302281	GTCACA	1	0.000268312	GCAGAG	1
TGCCGT	358	0.106706	CTTTGA	75	0.0799574	TGTAAT	3	0.016129	GGTCTA	5	0.000581328		ATGCTT	2	0.000389105	GAGATC	1	0.000152462	TAATGA	0	0	GAGGTC	0	0		TACCGT	39	0.110482	TTGGTC	14	0.0339806	TGGTTG	2	0.00444444	CTCGAC	2	0.000752162		CTCGCG	8	0.00182774	TATCCG	11	0.00302281	CCAAGA	1	0.000268312	CTGCGG	1
GTAGAT	357	0.106408	GGGCGC	75	0.0799574	TCCACG	3	0.016129	GGTGTT	5	0.000581328		CGATAT	2	0.000389105	GCAAGA	1	0.000152462	GAGTCC	0	0	TGCGCG	0	0		TACCGC	39	0.110482	TTCAAT	14	0.0339806	AGCTAT	2	0.00444444	CTTTCG	2	0.000752162		GCGGGG	8	0.00182774	GGACGC	11	0.00302281	GTGTAA	1	0.000268312	ATCTCA	1
TGTGGC	357	0.106408	TAGCGG	75	0.0799574	TATGCG	3	0.016129	CGGCAC	5	0.000581328		CACTTG	2	0.000389105	GAGGAC	1	0.000152462	TATGAG	0	0	TCCCTA	0	0		GTAGAT	39	0.110482	CTGTAA	14	0.0339806	GGGCGA	2	0.00444444	CTTCTG	1	0.000376081		GTACAA	8	0.00182774	TGTTAA	10	0.00274801	ACGATT	1	0.000268312	AGTCCG	1
TACAAC	357	0.106408	TCGTCG	74	0.0788913	TCTATT	3	0.016129	CGTTAC	5	0.000581328		GCGGAC	2	0.000389105	CCAATC	1	0.000152462	GAGTAT	0	0	GAGGGG	0	0		GTGTAT	39	0.110482	ATGAAA	14	0.0339806	GTGAGG	2	0.00444444	ATTTAC	1	0.000376081		TAGGCG	8	0.00182774	TGTCAC	10	0.00274801	TGCACC	1	0.000268312	ATCTAG	1
TGGATG	357	0.106408	TGCAAT	74	0.0788913	TTGCAT	3	0.016129	ATTCCA	5	0.000581328		CGCGAG	2	0.000389105	GAGATT	1	0.000152462	GAGTAG	0	0	GAGTAC	0	0		CTGGAA	39	0.110482	CTAGTC	14	0.0339806	TACTAA	2	0.00444444	ATTTCA	1	0.000376081		TAGAGT	8	0.00182774	ATGAAA	10	0.00274801	ACGCCG	1	0.000268312	GTTCCG	1
TGTTTC	357	0.106408	CCCTTG	74	0.0788913	CCCGGT	3	0.016129	GGGCGG	5	0.000581328		GAGCAC	2	0.000389105	GTTGTA	1	0.000152462	TGGTCA	0	0	GACTCT	0	0		TAGAGA	38	0.107649	AACCCG	14	0.0339806	CTAGTC	2	0.00444444	CGTAAG	1	0.000376081		TTCCTC	8	0.00182774	GGATTT	10	0.00274801	GTCGCA	1	0.000268312	GATTCA	1
TTTCGA	357	0.106408	AGACGG	74	0.0788913	CTTAGT	3	0.016129	GGGCGT	5	0.000581328		GGCAAC	2	0.000389105	CCAAAG	1	0.000152462	GGCGGG	0	0	TGCCTA	0	0		ATGATT	38	0.107649	CGACAC	14	0.0339806	CTTCAT	2	0.00444444	ATTTAA	1	0.000376081		AGCGGC	8	0.00182774	AGACAC	10	0.00274801	CTGTCA	1	0.000268312	TCGGGC	1
CACCAG	357	0.106408	CTGGTA	74	0.0788913	CTGCTG	3	0.016129	GTACGC	5	0.000581328		TCGGCC	2	0.000389105	CCAAAT	1	0.000152462	GAGGCT	0	0	GTTGCA	0	0		CTCGCA	38	0.107649	ATGGCA	14	0.0339806	GTCGCT	2	0.00444444	CTGAAA	1	0.000376081		GCCGGG	8	0.00182774	TACACC	10	0.00274801	TAACGG	1	0.000268312	GTGCCG	1
GGTACG	357	0.106408	CTAGTT	74	0.0788913	CTCCAC	3	0.016129	CGTGCG	5	0.000581328		TCGCCG	2	0.000389105	GAGGAG	1	0.000152462	GAGGCG	0	0	GATACC	0	0		GATGAC	38	0.107649	TAGTTA	14	0.0339806	GTTACG	2	0.00444444	TCGCTG	1	0.000376081		ATGCGG	8	0.00182774	TCGCTC	10	0.00274801	TAACCG	1	0.000268312	TCGCTC	1
GTTGTA	357	0.106408	CAGCGC	74	0.0788913	CTATGC	3	0.016129	TTCCTA	5	0.000581328		ATGCAC	2	0.000389105	CGCGGA	1	0.000152462	AGCAGA	0	0	TACACT	0	0		GTGATC	38	0.107649	TACCCC	13	0.0315534	TTGGGG	2	0.00444444	CTCTCT	1	0.000376081		CGCGCT	8	0.00182774	CTACCA	10	0.00274801	GTAGCC	1	0.000268312	TCTACC	1
TGTGCA	356	0.10611	TAGCAC	74	0.0788913	GACCTG	3	0.016129	CGCATA	5	0.000581328		CCTGTC	2	0.000389105	CCAGCT	1	0.000152462	ACCGAG	0	0	GATAAT	0	0		GTTACG	38	0.107649	TACACC	13	0.0315534	TCCCAT	2	0.00444444	ATTGGC	1	0.000376081		TAGGAA	8	0.00182774	TTTTGC	10	0.00274801	CATTGA	1	0.000268312	TGGAGA	1
TTCGTA	356	0.10611	TCGCGA	73	0.0778252	CTTTCC	3	0.016129	CGGCGC	5	0.000581328		CGAGTG	2	0.000389105	CCAGCG	1	0.000152462	GAGGGT	0	0	GATAAG	0	0		AAGACT	38	0.107649	CTGCGC	13	0.0315534	CTGTTT	2	0.00444444	GTGTAG	1	0.000376081		AATGTC	8	0.00182774	TAGGCT	9	0.00247321	GTGCGT	1	0.000268312	ATGTCA	1
ATGTGC	356	0.10611	TGGATT	73	0.0778252	TGTCTC	3	0.016129	GTGTTA	5	0.000581328		GCGCCC	2	0.000389105	GGTTTG	1	0.000152462	GAGGGG	0	0	AGCGAA	0	0		AGACAA	38	0.107649	GTGTCC	13	0.0315534	TCCCAA	2	0.00444444	ATGGAA	1	0.000376081		CTGCAT	8	0.00182774	GTGCTG	9	0.00247321	CCAATC	1	0.000268312	CAGGTC	1
TGTCTT	356	0.10611	TTAGCA	73	0.0778252	GGTATA	3	0.016129	TTATCG	5	0.000581328		TCTATC	2	0.000389105	GAGAAG	1	0.000152462	ACATCA	0	0	CTATAC	0	0		CTGTAT	37	0.104816	GTTGAC	13	0.0315534	CGAGTG	2	0.00444444	ATGCTT	1	0.000376081		TCTGTC	8	0.00182774	CGCCCA	9	0.00247321	GTGAGC	1	0.000268312	TACTAC	1
GTGCTG	356	0.10611	ATATCG	73	0.0778252	GCTGCA	3	0.016129	ATAATC	5	0.000581328		ATAACA	2	0.000389105	GATTCG	1	0.000152462	TTCAAA	0	0	CAACGA	0	0		TGTTTT	37	0.104816	TATATC	13	0.0315534	AGTTTG	2	0.00444444	CTGTGT	1	0.000376081		TATTCG	8	0.00182774	TGTATC	9	0.00247321	GTGATT	1	0.000268312	TACGTT	1
TTCTCC	356	0.10611	GTTCCC	73	0.0778252	TCCACA	3	0.016129	TTATGC	5	0.000581328		TCGTAT	2	0.000389105	CCACTT	1	0.000152462	GAGTTT	0	0	GCACTA	0	0		CTTGCT	37	0.104816	CTACCC	13	0.0315534	TGGGCG	2	0.00444444	ATGGTA	1	0.000376081		GCTTTC	8	0.00182774	CTGGTG	9	0.00247321	CCAGGT	1	0.000268312	TTCCCG	1
TCGCCA	356	0.10611	TTTGCA	73	0.0778252	AAGCGA	3	0.016129	GAGCCC	5	0.000581328		CCCATA	2	0.000389105	GAGAGT	1	0.000152462	GAGTTG	0	0	GGTGTA	0	0		TAGAGC	37	0.104816	GCGACT	13	0.0315534	ACGACG	2	0.00444444	ATGGAC	1	0.000376081		TACAAA	8	0.00182774	TCCAAT	9	0.00247321	GTGGTC	1	0.000268312	TAGAAT	1
CTTTCT	355	0.105812	ATAGCG	72	0.0767591	CCAGGG	3	0.016129	GTATCA	5	0.000581328		CGCGCA	2	0.000389105	CCAGAT	1	0.000152462	GTCCCA	0	0	GTATAG	0	0		GACATC	37	0.104816	GTTGGT	13	0.0315534	GTATCG	2	0.00444444	CTGTCC	1	0.000376081		AGGGGC	8	0.00182774	GTACAA	9	0.00247321	TGCCGT	1	0.000268312	TCATAG	1
TGCCAC	355	0.105812	TAGTTG	72	0.0767591	GTTTCA	3	0.016129	GACGGG	5	0.000581328		CGGAAG	2	0.000389105	CATTCC	1	0.000152462	TAGTGA	0	0	GAGTGT	0	0		CTATCC	37	0.104816	GTGTCG	13	0.0315534	CTAGCT	2	0.00444444	ATGACC	1	0.000376081		CTTTAA	8	0.00182774	GGTGAC	9	0.00247321	GTAGGT	1	0.000268312	GAAATC	1
CTGTCA	355	0.105812	AGACGT	72	0.0767591	TCGCGA	3	0.016129	CTGGTG	5	0.000581328		CAGCGC	2	0.000389105	CATGTG	1	0.000152462	GATAAT	0	0	GAGTGG	0	0		TTGATG	37	0.104816	TTCCGA	12	0.0291262	CTTCCT	2	0.00444444	ATGAAC	1	0.000376081		CTACAC	8	0.00182774	TCCGAT	9	0.00247321	CCGGCC	1	0.000268312	TACCCT	1
ATCACG	354	0.105514	GAGACT	72	0.0767591	GACGCG	3	0.016129	GACTTG	5	0.000581328		GCGGCT	2	0.000389105	GATCAC	1	0.000152462	GATAAG	0	0	GATAAC	0	0		ATGCGA	37	0.104816	TTCAAC	12	0.0291262	AGGTGG	2	0.00444444	ATCTTA	1	0.000376081		TCGCCG	8	0.00182774	TATCTA	9	0.00247321	CTTCGA	1	0.000268312	TACACC	1
ATGCAG	354	0.105514	CTTTTT	72	0.0767591	TTATGG	3	0.016129	TTTCAG	5	0.000581328		CCCCGC	2	0.000389105	GATATG	1	0.000152462	GAGTGC	0	0	CTGAGT	0	0		AGGACA	36	0.101983	ATACAT	12	0.0291262	CTTCTA	2	0.00444444	CTGTTC	1	0.000376081		TCCTTT	8	0.00182774	TACCTT	9	0.00247321	ATTCAC	1	0.000268312	GCGAGG	1
TTACCG	354	0.105514	GTACCT	72	0.0767591	TAGGAT	3	0.016129	GAGGCT	5	0.000581328		CTAGCA	2	0.000389105	GATATT	1	0.000152462	TTATTT	0	0	GAGTTT	0	0		GTAGAA	36	0.101983	GGACAG	12	0.0291262	AGACGC	2	0.00444444	ATGCCT	1	0.000376081		TTTCAG	8	0.00182774	TGTGCG	9	0.00247321	CCATAC	1	0.000268312	GCAAAG	1
GTAGTG	354	0.105514	GCGACA	71	0.075693	ATGTTT	3	0.016129	GTTCCA	5	0.000581328		TCCTAT	2	0.000389105	GATCAT	1	0.000152462	GAGTCT	0	0	GAGTTG	0	0		GTTCCC	36	0.101983	ATCCAC	12	0.0291262	GTGTCC	2	0.00444444	TAAGTG	1	0.000376081		TTTGTT	8	0.00182774	TCGCCG	9	0.00247321	TATAAA	1	0.000268312	TACCCA	1
GGACGG	354	0.105514	TGACAT	71	0.075693	GATGCA	3	0.016129	TTCTTA	5	0.000581328		TCCGGT	2	0.000389105	GATCCC	1	0.000152462	GAGTCG	0	0	AATCGA	0	0		ATTACA	36	0.101983	CTGGTC	12	0.0291262	TTCTCG	2	0.00444444	ATTATA	1	0.000376081		GGGCGC	8	0.00182774	AATCGA	9	0.00247321	ATTGTT	1	0.000268312	TACCAT	1
TCCATT	354	0.105514	CTACCT	71	0.075693	GTGCCC	3	0.016129	AACTCC	5	0.000581328		AATTGA	2	0.000389105	TAAAGA	1	0.000152462	GAGTTC	0	0	AGTAAG	0	0		TACCAG	36	0.101983	CACCAG	12	0.0291262	CGGACG	2	0.00444444	ATTACT	1	0.000376081		AGGTCG	8	0.00182774	TACCGC	9	0.00247321	TAGGGC	1	0.000268312	TACCAC	1
TTCCCA	353	0.105216	GCGACT	70	0.0746269	GTGATG	3	0.016129	GAGGCG	5	0.000581328		TCCAGG	2	0.000389105	CATGTC	1	0.000152462	AACGTT	0	0	GAGCAT	0	0		TTAACC	36	0.101983	CTACTA	12	0.0291262	AGACGA	2	0.00444444	CTGCGA	1	0.000376081		GTCGCA	8	0.00182774	TACAAA	9	0.00247321	TAGTAA	1	0.000268312	TGTGAG	1
CTAGCA	353	0.105216	CTTGTC	69	0.0735608	GTGAAC	3	0.016129	TCGCCC	5	0.000581328		CAGCCT	2	0.000389105	GAGTAT	1	0.000152462	GAGTGT	0	0	GAGCAG	0	0		GTTTCC	36	0.101983	TGTGCC	12	0.0291262	GGGACG	2	0.00444444	CTGATA	1	0.000376081		GCGACT	8	0.00182774	TAGTGA	9	0.00247321	CTTTCG	1	0.000268312	CTTTGC	1
TGGTTG	353	0.105216	TGTACA	68	0.0724947	ATGCCC	3	0.016129	ACACAG	5	0.000581328		TTGTGA	2	0.000389105	AAGTCA	1	0.000152462	GAGTGG	0	0	GAGCGC	0	0		GTTGAT	36	0.101983	ATTTAC	12	0.0291262	GGCGTA	2	0.00444444	CTGATC	1	0.000376081		CTCCGT	8	0.00182774	TAGGAA	9	0.00247321	GGCTGT	1	0.000268312	TATAGT	1
TACGTG	353	0.105216	GCGCAC	68	0.0724947	GTATCT	3	0.016129	CATGTC	5	0.000581328		TCACTC	2	0.000389105	ATTACT	1	0.000152462	GAGCAC	0	0	GAAGGT	0	0		CTTCCG	36	0.101983	TTATCT	12	0.0291262	GTTCCA	2	0.00444444	TATTGG	1	0.000376081		CGTGTG	8	0.00182774	TGTTCG	9	0.00247321	TAGTGC	1	0.000268312	TATAAA	1
AAGATT	352	0.104918	GTTGCT	68	0.0724947	CGCGCA	3	0.016129	TTTGGT	5	0.000581328		ACCATT	2	0.000389105	GAGTTG	1	0.000152462	CCGGCC	0	0	GAGCCT	0	0		CTGCGC	36	0.101983	TATTCT	12	0.0291262	GTGGTT	2	0.00444444	ATGTTA	1	0.000376081		GGGCGG	8	0.00182774	ACTAGA	9	0.00247321	GGGACC	1	0.000268312	TATCTT	1
TGTGTC	352	0.104918	TGTTGT	68	0.0724947	TTAGAC	3	0.016129	GCTGCA	5	0.000581328		ACCCGC	2	0.000389105	GAGTTT	1	0.000152462	GAGATT	0	0	CAAGAA	0	0		TTTCGA	36	0.101983	ACGCAT	12	0.0291262	TGTGAA	2	0.00444444	ATGTGC	1	0.000376081		CGGGAT	7	0.00159927	TTACCA	8	0.00219841	GGGACA	1	0.000268312	TATCTC	1
TTACAC	352	0.104918	TGGCAT	67	0.0714286	CTTCTC	3	0.016129	CTTATC	5	0.000581328		ATGCGT	2	0.000389105	CACACG	1	0.000152462	TATAAA	0	0	CATCAA	0	0		TAGAGG	36	0.101983	TATCTA	12	0.0291262	CGATTG	2	0.00444444	ATGTAT	1	0.000376081		TTCATA	7	0.00159927	TATTCT	8	0.00219841	CTCAAC	1	0.000268312	GGGTCG	1
GTGCTA	352	0.104918	GATACA	67	0.0714286	GACGGG	3	0.016129	ATTATG	5	0.000581328		ACCAGG	2	0.000389105	CACATA	1	0.000152462	CCTTTA	0	0	CTTCTG	0	0		TTACTA	36	0.101983	TTACGC	12	0.0291262	GAGATT	2	0.00444444	ATGCGA	1	0.000376081		GGCGCC	7	0.00159927	ATCCAC	8	0.00219841	TAGGCC	1	0.000268312	TAGTTT	1
TATATG	352	0.104918	TCGCCC	67	0.0714286	GGAGCG	3	0.016129	AACTCA	5	0.000581328		CGCTCG	2	0.000389105	GATAAT	1	0.000152462	GACTAG	0	0	GAGAGT	0	0		CTTGGT	36	0.101983	ATGGCG	11	0.026699	TGTGAC	2	0.00444444	ATTAAC	1	0.000376081		GTCGAC	7	0.00159927	CTTACA	8	0.00219841	TGCCCC	1	0.000268312	TAGTAA	1
TGGTTA	352	0.104918	TCTACA	67	0.0714286	GGACAT	3	0.016129	GACCAG	5	0.000581328		CGCGTT	2	0.000389105	CATTCG	1	0.000152462	AAACTA	0	0	AAAACA	0	0		CTTCTA	36	0.101983	CTACAA	11	0.026699	TATCAC	2	0.00444444	ATGTTC	1	0.000376081		TATCAA	7	0.00159927	TTAACG	8	0.00219841	TTTGTG	1	0.000268312	TAGCGA	1
TGTGCT	352	0.104918	ATGATT	67	0.0714286	TTGACA	3	0.016129	TTGGGA	5	0.000581328		ATGCGG	2	0.000389105	AGCACT	1	0.000152462	GAGCAG	0	0	GAGCAC	0	0		TAGACT	36	0.101983	TAGGCC	11	0.026699	TGTCCC	2	0.00444444	CGCCTC	1	0.000376081		TGTGAA	7	0.00159927	TGCGCT	8	0.00219841	TAGCCC	1	0.000268312	TAGATA	1
TGTCGG	351	0.10462	ATGACC	67	0.0714286	GCACCG	3	0.016129	TTCATA	5	0.000581328		ACCCAG	2	0.000389105	CGTGCG	1	0.000152462	GAGAGC	0	0	GCCTGA	0	0		ATGAAA	35	0.0991501	TCGCTC	11	0.026699	TGGGAT	2	0.00444444	GTTCTC	1	0.000376081		TACACG	7	0.00159927	TCCATC	8	0.00219841	GGGCAC	1	0.000268312	TAGTTA	1
TGTCGA	351	0.10462	TTTAGC	67	0.0714286	ACTCCT	3	0.016129	AGTTTG	5	0.000581328		GCGGCC	2	0.000389105	CGTTCT	1	0.000152462	CGTCGA	0	0	GAGATT	0	0		CTGTAA	35	0.0991501	GATGCA	11	0.026699	TGTCTA	2	0.00444444	CCAGAC	1	0.000376081		CTGAGC	7	0.00159927	CTTCTC	8	0.00219841	GGGCAA	1	0.000268312	GGCTCC	1
AGGACG	351	0.10462	CTGCGA	67	0.0714286	ATACGA	3	0.016129	GTGTCA	5	0.000581328		GCAGGT	2	0.000389105	CGTCTT	1	0.000152462	GAGACT	0	0	GAGATG	0	0		TGTCGG	35	0.0991501	TGGGAA	11	0.026699	GAGACT	2	0.00444444	TTGGGA	1	0.000376081		TGTTAA	7	0.00159927	GCCATT	8	0.00219841	TAGGAT	1	0.000268312	GTGGCG	1
TTGGCC	351	0.10462	TACCTC	66	0.0703625	ATTACA	3	0.016129	CTGTCT	5	0.000581328		AGTTGA	2	0.000389105	CGACTT	1	0.000152462	GAGACG	0	0	GAGGCC	0	0		CTATCG	35	0.0991501	CAGACT	11	0.026699	GTCACG	2	0.00444444	CGCTGC	1	0.000376081		AGCCCA	7	0.00159927	GTACAC	8	0.00219841	ATTGCC	1	0.000268312	TTCAGC	1
GTATCC	351	0.10462	CTAGTG	66	0.0703625	AAGACT	3	0.016129	ACCTAG	5	0.000581328		TCAGTT	2	0.000389105	TTACTA	1	0.000152462	GAGATC	0	0	CTATAT	0	0		GTACAA	35	0.0991501	TTAACT	11	0.026699	GGACAT	2	0.00444444	ATCAAA	1	0.000376081		TACCCT	7	0.00159927	GTGAAT	8	0.00219841	ATTGAT	1	0.000268312	TTATTT	1
TTACCC	351	0.10462	AAGACA	66	0.0703625	ACCATT	3	0.016129	GTGCTG	5	0.000581328		CGGCGG	2	0.000389105	CGTTTC	1	0.000152462	CTCAGC	0	0	TATTGA	0	0		GGACAA	35	0.0991501	GTATCG	11	0.026699	ATGGTA	2	0.00444444	CCGGCT	1	0.000376081		AGACTC	7	0.00159927	TACCCT	8	0.00219841	GGCGCC	1	0.000268312	TTATTA	1
CTCTAC	351	0.10462	TGTGAT	65	0.0692964	TGTTCG	2	0.0107527	GCTGTG	5	0.000581328		TTTTCA	2	0.000389105	CTAAAT	1	0.000152462	GAGAGT	0	0	GAGGAG	0	0		CTGTCA	35	0.0991501	TGCACA	11	0.026699	TGTAAA	2	0.00444444	CGCCCA	1	0.000376081		TGCTAA	7	0.00159927	TGGACA	8	0.00219841	AGACAT	1	0.000268312	TTCATC	1
TATTGG	351	0.10462	TACCGA	65	0.0692964	CGCCTG	2	0.0107527	GCTTAT	5	0.000581328		GAGAAG	2	0.000389105	CGTGTT	1	0.000152462	GAGAGG	0	0	GAGGGC	0	0		TTAATG	35	0.0991501	TCCGCT	11	0.026699	TAACAA	2	0.00444444	CCCACA	1	0.000376081		TGGTTG	7	0.00159927	GTGCCT	8	0.00219841	GGCCTC	1	0.000268312	TTCATA	1
CTATGC	351	0.10462	CAGCGG	65	0.0692964	TCGCTC	2	0.0107527	AAATAG	5	0.000581328		CGCGGC	2	0.000389105	CGTTAC	1	0.000152462	GAGGAC	0	0	GACAAG	0	0		GGACAC	35	0.0991501	TACCTC	11	0.026699	GATCAC	2	0.00444444	GGCGTT	1	0.000376081		TCCCCA	7	0.00159927	TTCTAT	8	0.00219841	ATGTAC	1	0.000268312	TGTAAA	1
TTACAG	350	0.104322	GTTGAG	65	0.0692964	TCACTA	2	0.0107527	TTCAAG	5	0.000581328		CATTTA	2	0.000389105	ACGATG	1	0.000152462	CTTGCC	0	0	GAGGCT	0	0		TACCCC	35	0.0991501	CGCCCA	11	0.026699	GGCCGG	2	0.00444444	GAGTCA	1	0.000376081		TGCGCA	7	0.00159927	TCGCCC	8	0.00219841	GGCGGC	1	0.000268312	TTACCC	1
ACGACG	350	0.104322	GTAGTC	64	0.0682303	TCGTCG	2	0.0107527	GCTAGG	5	0.000581328		TCGTGT	2	0.000389105	TCTCCA	1	0.000152462	TTAGCA	0	0	GAGGCG	0	0		TGTTAC	35	0.0991501	CTGACC	11	0.026699	TTCAAC	2	0.00444444	CGGTAA	1	0.000376081		AGACTA	7	0.00159927	CTAGAA	8	0.00219841	ATGCAC	1	0.000268312	ACCAAG	1
TAGGCG	349	0.104024	AGACGA	64	0.0682303	GCCTTA	2	0.0107527	GCTTCT	5	0.000581328		ACTATA	2	0.000389105	CGATAT	1	0.000152462	GAGCTG	0	0	GAGCTC	0	0		GTCATT	35	0.0991501	CTGCGG	11	0.026699	GAGCCT	2	0.00444444	CTAATT	1	0.000376081		TCCTCA	7	0.00159927	GTGGCC	8	0.00219841	CGGCCT	1	0.000268312	TGTTCC	1
TTGGGA	349	0.104024	GTTCAT	64	0.0682303	TGCCCA	2	0.0107527	GAATAC	5	0.000581328		ACCTCC	2	0.000389105	CGAGGT	1	0.000152462	GAGGCC	0	0	AGCATG	0	0		TGGACT	35	0.0991501	AAATCG	11	0.026699	GAGCCA	2	0.00444444	CTAGGC	1	0.000376081		TGTTAT	7	0.00159927	TAGTTT	8	0.00219841	CCACCG	1	0.000268312	TGTTCA	1
TGCTTT	348	0.103726	TTGTTC	64	0.0682303	CTGGTT	2	0.0107527	GTTTCA	5	0.000581328		TGAACT	2	0.000389105	GGCCGA	1	0.000152462	ATTGCT	0	0	GAGCGT	0	0		CTGTTA	34	0.0963173	GTGAAG	11	0.026699	ACCGTA	2	0.00444444	CGTACC	1	0.000376081		AGCACC	7	0.00159927	CCATTT	8	0.00219841	TATTAA	1	0.000268312	TTACCA	1
CTACTA	348	0.103726	TAGCTA	63	0.0671642	ACCGCG	2	0.0107527	ATGGCA	5	0.000581328		ACTGAT	2	0.000389105	CGATCC	1	0.000152462	GAGGAT	0	0	AGAATA	0	0		AGACTA	34	0.0963173	TTGGGC	10	0.0242718	TTAGAC	2	0.00444444	CCGCTG	1	0.000376081		GCGCAC	7	0.00159927	TTTCGA	8	0.00219841	CTGTGG	1	0.000268312	TTACAT	1
TTTGCA	348	0.103726	GTATCG	63	0.0671642	TGCGGA	2	0.0107527	GCTTGC	5	0.000581328		TGACTG	2	0.000389105	CGTACG	1	0.000152462	GAGGAG	0	0	GAGGAC	0	0		ATGTCA	34	0.0963173	CTGTCG	10	0.0242718	ATAACT	2	0.00444444	TCGCCC	1	0.000376081		TCCGTT	7	0.00159927	TTCAAT	7	0.00192361	TATTCC	1	0.000268312	TTAATT	1
GGACGC	348	0.103726	TCGTAC	62	0.0660981	CCTGGC	2	0.0107527	ATCTTT	5	0.000581328		GTCCTC	2	0.000389105	CGTCAC	1	0.000152462	ACGCTA	0	0	TAAACT	0	0		TTAGAC	34	0.0963173	TTAACC	10	0.0242718	ATGATC	2	0.00444444	CGGGGG	1	0.000376081		GGTGTC	7	0.00159927	GATGTC	7	0.00192361	GTTAAG	1	0.000268312	TTTTTT	1
GTTGGA	348	0.103726	TTACGA	62	0.0660981	CGCGAG	2	0.0107527	CCGAGG	5	0.000581328		CGGGCG	2	0.000389105	CGAGAC	1	0.000152462	TCCTAC	0	0	GAGCTT	0	0		TTACCT	34	0.0963173	TTAAAA	10	0.0242718	CGTGCA	2	0.00444444	CTGGTT	1	0.000376081		GTGCTG	7	0.00159927	TCCGTT	7	0.00192361	ATGGAT	1	0.000268312	TTTGAA	1
TATCCA	348	0.103726	CGACAT	62	0.0660981	TTCGCA	2	0.0107527	GCACGG	5	0.000581328		CATAAC	2	0.000389105	CGATAG	1	0.000152462	GTCGAA	0	0	GAGCTG	0	0		TAGGCC	34	0.0963173	TTCTAT	10	0.0242718	AAGAAC	2	0.00444444	ATTGAG	1	0.000376081		TCGAAA	7	0.00159927	TAGGCG	7	0.00192361	ATGTGC	1	0.000268312	TTTCTC	1
CTTTAC	347	0.103428	CTCACA	62	0.0660981	ATACTC	2	0.0107527	TTCTCT	5	0.000581328		ATAAGT	2	0.000389105	GTGGGA	1	0.000152462	GAGCCG	0	0	GATTCG	0	0		TGTCAG	34	0.0963173	TAGGAT	10	0.0242718	GTGGCT	2	0.00444444	TTAATG	1	0.000376081		TAGTTT	7	0.00159927	CTGTAT	7	0.00192361	ATGTCT	1	0.000268312	TTTAAT	1
TAGTTC	347	0.103428	ATGATA	62	0.0660981	AATCTC	2	0.0107527	ACGATA	5	0.000581328		CTACCA	2	0.000389105	GGCTAG	1	0.000152462	GAGCTC	0	0	GATTCC	0	0		TTAAAA	34	0.0963173	TTAGCC	10	0.0242718	TTAGCC	2	0.00444444	CCGTGC	1	0.000376081		CTGGTT	7	0.00159927	TCTGTC	7	0.00192361	CGCTAT	1	0.000268312	TTTTGA	1
TCACGT	347	0.103428	TGTTTA	61	0.065032	CAGGCA	2	0.0107527	GATATT	5	0.000581328		TGGTCA	2	0.000389105	TACTGA	1	0.000152462	TGATGC	0	0	TTCAGT	0	0		TATCAG	34	0.0963173	CTTCTA	10	0.0242718	ATGCCG	2	0.00444444	CCTGCC	1	0.000376081		CTTACG	6	0.0013708	CTGCGC	7	0.00192361	GGACGA	1	0.000268312	TTTTAT	1
CTGCAT	347	0.103428	ATTTCA	61	0.065032	AGTTTT	2	0.0107527	CTGATG	5	0.000581328		CACGTC	2	0.000389105	AGTCTA	1	0.000152462	GAGCGT	0	0	CCCATA	0	0		CTAGTG	34	0.0963173	TACAAC	10	0.0242718	CATTGC	2	0.00444444	CGACCA	1	0.000376081		CTATCA	6	0.0013708	CTCCCC	7	0.00192361	ATGCGT	1	0.000268312	TTTGTA	1
CTTAAC	346	0.10313	TGACAG	61	0.065032	AACCAG	2	0.0107527	AAAATT	5	0.000581328		CAGTCC	2	0.000389105	CTAGGC	1	0.000152462	GAGCGG	0	0	CCAGCA	0	0		TGTCTT	34	0.0963173	GGACAT	10	0.0242718	GGGCGG	2	0.00444444	CGACAT	1	0.000376081		GGACGG	6	0.0013708	TAGAGG	7	0.00192361	GGCTAT	1	0.000268312	TTGGTC	1
TGCCCC	346	0.10313	CTTGCC	60	0.0639659	TATCTC	2	0.0107527	GCCCCC	5	0.000581328		ACACGG	2	0.000389105	CCTTGG	1	0.000152462	GATGTT	0	0	GATTGC	0	0		CTTGCG	34	0.0963173	TTATGT	10	0.0242718	CTGCCC	2	0.00444444	CGTACA	1	0.000376081		GTGGCT	6	0.0013708	CGCCCC	7	0.00192361	ATGGGA	1	0.000268312	GTCTTT	1
CTGTAG	345	0.102832	TACCTG	60	0.0639659	TTTGGA	2	0.0107527	TGGAGA	5	0.000581328		ACAGAC	2	0.000389105	CTACGC	1	0.000152462	TAGGTA	0	0	GTTGAG	0	0		TTCCTG	34	0.0963173	TTTTTC	10	0.0242718	CCTGAG	2	0.00444444	CCTCTA	1	0.000376081		CTGGGT	6	0.0013708	ATGCCA	7	0.00192361	TATCGC	1	0.000268312	TTCCGC	1
GTAGTC	345	0.102832	GTTCCG	60	0.0639659	CGTACA	2	0.0107527	ATATCC	5	0.000581328		GCCTCT	2	0.000389105	ATCTCA	1	0.000152462	GATGTC	0	0	GATTCT	0	0		GTGAAG	34	0.0963173	CTATGC	10	0.0242718	CAGTCC	2	0.00444444	CCTCCT	1	0.000376081		TTAACT	6	0.0013708	CTCGAT	7	0.00192361	CGACAT	1	0.000268312	GTGGGG	1
CTTATA	344	0.102534	GTCGCA	59	0.0628998	TCGTAC	2	0.0107527	GCGGGC	5	0.000581328		TATATT	2	0.000389105	CCTCCG	1	0.000152462	AGCATT	0	0	GATGTG	0	0		TGTCAA	33	0.0934844	TTACCT	10	0.0242718	CTCGTT	2	0.00444444	TGAGAA	1	0.000376081		GAGACT	6	0.0013708	CGGACG	7	0.00192361	CTAGCA	1	0.000268312	CAATTT	1
TGACTT	344	0.102534	TTCGCG	59	0.0628998	CTCGTA	2	0.0107527	GCCCGT	5	0.000581328		GGGGCA	2	0.000389105	CTGTGC	1	0.000152462	ATCTCA	0	0	GATGTC	0	0		TGGACA	33	0.0934844	TACCCG	10	0.0242718	ATTTAT	2	0.00444444	CGAAGC	1	0.000376081		CAATGT	6	0.0013708	GGGGAG	7	0.00192361	CCTTGC	1	0.000268312	AGCCTT	1
ATGGCA	343	0.102235	TTGAGG	59	0.0628998	CCCCGA	2	0.0107527	GCCGCG	5	0.000581328		TCATGT	2	0.000389105	TCTCTA	1	0.000152462	GATTAG	0	0	TCGCTG	0	0		GTCACA	33	0.0934844	TACTCA	10	0.0242718	TACCCC	2	0.00444444	TCTGAC	1	0.000376081		GTGGAG	6	0.0013708	TACACT	7	0.00192361	CACGAA	1	0.000268312	GTTCGG	1
ATGCCT	343	0.102235	TAGCGC	59	0.0628998	CTGTGT	2	0.0107527	AGATCG	5	0.000581328		CGAGGG	2	0.000389105	CTAGCT	1	0.000152462	GATTAC	0	0	GATGGT	0	0		CCCCAC	33	0.0934844	ATAGCC	10	0.0242718	TACACT	2	0.00444444	CGATGC	1	0.000376081		CTAGAG	6	0.0013708	CTGGCC	7	0.00192361	GGTCAC	1	0.000268312	TGCCGA	1
TCCCCT	343	0.102235	GTACAT	59	0.0628998	GGGTTT	2	0.0107527	TAGAAC	5	0.000581328		AGGGCA	2	0.000389105	TTTCTA	1	0.000152462	CAAACC	0	0	GATTAG	0	0		GAGACA	33	0.0934844	GTTTAT	10	0.0242718	CCCCCC	2	0.00444444	TCGTGG	1	0.000376081		TGCCGA	6	0.0013708	CTGCAG	7	0.00192361	CGACTA	1	0.000268312	TGCCAA	1
TGCTCT	342	0.101937	TAGCCT	59	0.0628998	CTGCTA	2	0.0107527	TAGAGC	5	0.000581328		TATCAC	2	0.000389105	TCTGTA	1	0.000152462	GCCAGA	0	0	TGGGCA	0	0		CGTGAC	33	0.0934844	GGGCAG	10	0.0242718	ACAAAC	2	0.00444444	CCGAAC	1	0.000376081		GTGTAA	6	0.0013708	GGGCGC	7	0.00192361	AGTGCA	1	0.000268312	TGCACT	1
TTAATA	342	0.101937	GTGACG	59	0.0628998	CATGTA	2	0.0107527	AGCATT	5	0.000581328		CAGTGG	2	0.000389105	CTAAGG	1	0.000152462	GATGCG	0	0	TCAAGA	0	0		CGGACA	33	0.0934844	TGTAAT	10	0.0242718	CTCAAC	2	0.00444444	GATTCG	1	0.000376081		GTTACG	6	0.0013708	TCCATA	7	0.00192361	CACCCA	1	0.000268312	TGCACA	1
TGGCGG	342	0.101937	TACATT	59	0.0628998	CTGCTC	2	0.0107527	ACTAGA	5	0.000581328		TAATCT	2	0.000389105	CTCGTG	1	0.000152462	GATGCC	0	0	GCAGAA	0	0		TGCATT	33	0.0934844	CAGCGG	10	0.0242718	CGCGCC	2	0.00444444	GTAGTG	1	0.000376081		GCCTGA	6	0.0013708	CTGAGC	7	0.00192361	TACACA	1	0.000268312	TGCCCT	1
TGTGAC	342	0.101937	TGCCAC	58	0.0618337	ACTCAC	2	0.0107527	TACTAT	5	0.000581328		CAGTCG	2	0.000389105	CGACAT	1	0.000152462	TGTAAG	0	0	TAATTA	0	0		GTACAC	33	0.0934844	GTGTTT	10	0.0242718	TGTCGG	2	0.00444444	TAGTAG	1	0.000376081		TCCAAT	6	0.0013708	ATCACA	7	0.00192361	TACAGC	1	0.000268312	CCTTTC	1
TAGGCT	341	0.101639	TCGAAT	58	0.0618337	CATTGA	2	0.0107527	CCGCGA	5	0.000581328		TTCATA	2	0.000389105	GGTCGA	1	0.000152462	GATGGT	0	0	GCAACC	0	0		GTGTGT	33	0.0934844	TTCTGG	10	0.0242718	TACCTC	2	0.00444444	CCGAGT	1	0.000376081		GAGTCT	6	0.0013708	AGCCCA	7	0.00192361	GGATTG	1	0.000268312	TGCCCC	1
CTGACC	341	0.101639	TTGTAG	58	0.0618337	CGGAAT	2	0.0107527	CATGCG	5	0.000581328		TCATTC	2	0.000389105	CTAAGC	1	0.000152462	GATGGG	0	0	ATGAGT	0	0		ATACAA	33	0.0934844	GGCGCA	10	0.0242718	TTTTAT	2	0.00444444	CGACGA	1	0.000376081		GCGTGC	6	0.0013708	AAGACG	7	0.00192361	CACGCT	1	0.000268312	AGCTGG	1
TGCCGC	341	0.101639	CTTTAG	58	0.0618337	ATTAGA	2	0.0107527	TCGATA	5	0.000581328		TGGCCA	2	0.000389105	CCTTTT	1	0.000152462	GATGGC	0	0	TTTATA	0	0		GTGTTG	33	0.0934844	TAGAGA	9	0.0218447	TTTTTG	2	0.00444444	CTGCTC	1	0.000376081		ATTCAT	6	0.0013708	CGACTA	7	0.00192361	CACTTC	1	0.000268312	TGAGCC	1
TGACGT	341	0.101639	ATGATG	58	0.0618337	TAGGTG	2	0.0107527	TATAAT	5	0.000581328		TAGTCA	2	0.000389105	CCTTTG	1	0.000152462	CTTTGA	0	0	CGCCCT	0	0		CTGCCG	33	0.0934844	CACCAT	9	0.0218447	AACCCG	2	0.00444444	CCCTGC	1	0.000376081		CGGCCC	6	0.0013708	GTGATT	7	0.00192361	CACTTA	1	0.000268312	TGACTC	1
TGTATC	341	0.101639	TGCATT	57	0.0607676	CTGATT	2	0.0107527	TATCCG	5	0.000581328		GAGGGT	2	0.000389105	CTAATG	1	0.000152462	GATTTT	0	0	GCAAGC	0	0		CTGTGC	33	0.0934844	CTGTTT	9	0.0218447	CTGCGT	2	0.00444444	TACCCT	1	0.000376081		CGGACG	6	0.0013708	TGATTT	7	0.00192361	GGTGAC	1	0.000268312	TGACGC	1
GTGATG	341	0.101639	TGGAAT	57	0.0607676	CGGGTT	2	0.0107527	AGGCGT	5	0.000581328		GAAACG	1	0.000194553	CTAATT	1	0.000152462	GATTTG	0	0	GGGATT	0	0		TGGGCG	32	0.0906516	GAGCGA	9	0.0218447	CTCGAA	2	0.00444444	GTATGA	1	0.000376081		CTGCAG	6	0.0013708	CTAGCC	7	0.00192361	CACGCC	1	0.000268312	TGATCC	1
TCGACG	341	0.101639	ATGTAT	57	0.0607676	AAATGG	2	0.0107527	CCACTA	5	0.000581328		GAAAGG	1	0.000194553	CTACAG	1	0.000152462	GATTTC	0	0	GCAACT	0	0		GTGTAG	32	0.0906516	CTCGCG	9	0.0218447	TACAAA	2	0.00444444	TTCCTG	1	0.000376081		TGTTGT	6	0.0013708	GTCGAC	7	0.00192361	CGAAGC	1	0.000268312	CGTCCG	1
TCTACA	340	0.101341	CCCACA	57	0.0607676	TTAAAT	2	0.0107527	TAGTCG	5	0.000581328		GAGTCC	1	0.000194553	GTGGGG	1	0.000152462	GGCGGC	0	0	GATTTG	0	0		CTTCTC	32	0.0906516	GTGCCC	9	0.0218447	TCCGCT	2	0.00444444	CTAGTT	1	0.000376081		TCGTAG	6	0.0013708	TGTTTA	7	0.00192361	ATGGTC	1	0.000268312	TCAGAG	1
TAGGTA	340	0.101341	GTACAG	57	0.0607676	CTGCCA	2	0.0107527	ATTCAT	5	0.000581328		GACTCG	1	0.000194553	CGGCCC	1	0.000152462	AAAGGA	0	0	GATTTC	0	0		TGGAAA	32	0.0906516	TAGGCT	9	0.0218447	GTGCTG	2	0.00444444	CTAGTC	1	0.000376081		GTGAAC	6	0.0013708	TGCCTA	7	0.00192361	AGCGTG	1	0.000268312	TGTCTC	1
TGTGGT	340	0.101341	CTGTGA	57	0.0607676	GCGTGT	2	0.0107527	TCTTGT	5	0.000581328		AGAGTA	1	0.000194553	TGATCA	1	0.000152462	GGGGCA	0	0	AGGTAC	0	0		TACCGG	32	0.0906516	CTAGAG	9	0.0218447	GTACAC	2	0.00444444	CTAGTA	1	0.000376081		GTGTGC	6	0.0013708	TAACCT	7	0.00192361	CATAGT	1	0.000268312	CACCAT	1
TTCCGC	340	0.101341	ATGTGC	57	0.0607676	ACGAGG	2	0.0107527	CGTGTG	5	0.000581328		GATCGT	1	0.000194553	CGCTTG	1	0.000152462	GCAAAC	0	0	GATTGT	0	0		AAGACG	32	0.0906516	CCTGAG	9	0.0218447	CTCTCT	2	0.00444444	CTACCT	1	0.000376081		GTGGTA	6	0.0013708	TGTGCC	7	0.00192361	TTCACG	1	0.000268312	TGGGTC	1
GTAGGC	340	0.101341	TGGCCA	57	0.0607676	TAGTTG	2	0.0107527	TGGATG	5	0.000581328		GAAAAT	1	0.000194553	CGCCGC	1	0.000152462	TCGACT	0	0	GCAAAG	0	0		CTGGTT	32	0.0906516	GATGAA	9	0.0218447	GTACCA	2	0.00444444	CATGTC	1	0.000376081		CTAGCC	6	0.0013708	TGTCGT	7	0.00192361	CCTTCA	1	0.000268312	TGGGGC	1
TGCCCG	340	0.101341	TTGTGA	57	0.0607676	CTCTCA	2	0.0107527	GTTTGG	5	0.000581328		GAAAAC	1	0.000194553	CGCCCC	1	0.000152462	GATTCT	0	0	GCAAAC	0	0		GTTTAA	32	0.0906516	CTACGG	9	0.0218447	CCGCCA	2	0.00444444	TAACTG	1	0.000376081		GGTAGG	6	0.0013708	CTGGTC	7	0.00192361	TGGTTT	1	0.000268312	TGTCGT	1
TTCCGA	339	0.101043	GGTACA	57	0.0607676	GCAACC	2	0.0107527	GTTTTG	5	0.000581328		CTTTTC	1	0.000194553	GGGGTA	1	0.000152462	GATTCG	0	0	CAAGCA	0	0		TACAAT	32	0.0906516	AGCAGT	9	0.0218447	GACCCC	1	0.00222222	CACATC	1	0.000376081		GGTGTT	6	0.0013708	CACCGT	7	0.00192361	GGGTTA	1	0.000268312	TGTCCT	1
TACTTA	339	0.101043	TGGAAC	56	0.0597015	GGCCCT	2	0.0107527	ATTCTA	5	0.000581328		TTTCGA	1	0.000194553	AGTTTA	1	0.000152462	CGGTTA	0	0	GGCATA	0	0		TTTAGT	32	0.0906516	ATACAC	9	0.0218447	CACCAG	1	0.00222222	CACATT	1	0.000376081		TTCGTT	6	0.0013708	GGGCGG	6	0.0016488	TAGAAC	1	0.000268312	CGAGGG	1
TGGCAG	339	0.101043	GTTTGC	56	0.0597015	TTCTCC	2	0.0107527	TACACG	5	0.000581328		CACTCC	1	0.000194553	CGGATC	1	0.000152462	CTCTGA	0	0	GATCCG	0	0		TAGAAG	32	0.0906516	CTCGAA	9	0.0218447	ATGTCG	1	0.00222222	CTCCAA	1	0.000376081		GATGTC	6	0.0013708	CTACAC	6	0.0016488	TAGAAT	1	0.000268312	TGGGAC	1
TTCGCG	337	0.100447	GTACCG	55	0.0586354	GGCCCG	2	0.0107527	GCGTCG	5	0.000581328		GATTAC	1	0.000194553	CGGCAG	1	0.000152462	GATTGT	0	0	GATCCC	0	0		CTAGGC	32	0.0906516	CTTCAT	9	0.0218447	TATTAA	1	0.00222222	CTCAAC	1	0.000376081		TGCACC	6	0.0013708	GTGAAC	6	0.0016488	ATTTTC	1	0.000268312	TGCTCA	1
TGCCTT	337	0.100447	CTCCCA	55	0.0586354	GATACA	2	0.0107527	TGGCCA	5	0.000581328		GATTTC	1	0.000194553	CGCGTC	1	0.000152462	GATTGG	0	0	GGCGGA	0	0		GGACAG	32	0.0906516	GTTACC	9	0.0218447	CATCTT	1	0.00222222	CAAAGC	1	0.000376081		GAACGC	6	0.0013708	GTGGTA	6	0.0016488	TAGCAA	1	0.000268312	TGCTAT	1
CTCGCG	336	0.100149	ATGCTC	55	0.0586354	CGCTTT	2	0.0107527	CTGCTT	5	0.000581328		AAATCA	1	0.000194553	CGCTAC	1	0.000152462	GATTGC	0	0	GATCAG	0	0		CAGACG	32	0.0906516	TCTATT	9	0.0218447	CCCTCT	1	0.00222222	CTCCGC	1	0.000376081		TGTATT	6	0.0013708	TTTTTA	6	0.0016488	GGTGCG	1	0.000268312	TGCCGT	1
TTCAAG	336	0.100149	TATGCA	55	0.0586354	CTTCTA	2	0.0107527	TGCTCG	5	0.000581328		GGAGCA	1	0.000194553	CAAATA	1	0.000152462	GTTGTA	0	0	GATCGG	0	0		GTATCG	32	0.0906516	TTAGCA	9	0.0218447	AACTGC	1	0.00222222	ATTTCT	1	0.000376081		TTCTCT	6	0.0013708	TATTTT	6	0.0016488	CAAAAT	1	0.000268312	TGGCTT	1
TGCCGG	336	0.100149	TTTACT	55	0.0586354	CTACCC	2	0.0107527	AAGCCA	5	0.000581328		CACAGT	1	0.000194553	GCTAGA	1	0.000152462	ACAGTA	0	0	GATCGC	0	0		GGTTTA	31	0.0878187	ACCACA	9	0.0218447	TCGGCA	1	0.00222222	ATTTGC	1	0.000376081		TGCTTA	6	0.0013708	GGGACG	6	0.0016488	TAGATC	1	0.000268312	TGGCAA	1
TTGTTA	336	0.100149	CTGTAC	55	0.0586354	AGTGCC	2	0.0107527	TCCTGG	5	0.000581328		AGAACA	1	0.000194553	CGCGGT	1	0.000152462	GATATG	0	0	GATAGC	0	0		TCGTCT	31	0.0878187	GGACGT	9	0.0218447	CAGTCA	1	0.00222222	ACGCAT	1	0.000376081		TTTAAG	6	0.0013708	CTGGCT	6	0.0016488	ACAGCG	1	0.000268312	TGGAGC	1
TAACAG	336	0.100149	GTAGCT	54	0.0575693	AGTGAT	2	0.0107527	ACTGTC	5	0.000581328		TACGCC	1	0.000194553	GTTAGA	1	0.000152462	GATATC	0	0	ACATCA	0	0		TTGAAA	31	0.0878187	CTGTTA	9	0.0218447	CTCTTA	1	0.00222222	CTATCG	1	0.000376081		AGATTT	6	0.0013708	GGCGGG	6	0.0016488	GGACCG	1	0.000268312	GCGGCA	1
CGGACG	335	0.099851	TTGTGG	54	0.0575693	TTACCT	2	0.0107527	TCGCAC	5	0.000581328		GACTCT	1	0.000194553	CAACAT	1	0.000152462	TGAACA	0	0	GATATC	0	0		AGGACG	31	0.0878187	TGTCCC	9	0.0218447	ACCATC	1	0.00222222	CTATGC	1	0.000376081		GGCATT	6	0.0013708	CTACAT	6	0.0016488	CCATAG	1	0.000268312	AGACGG	1
ATGTTA	335	0.099851	TACCGG	54	0.0575693	ATGCCA	2	0.0107527	ATGGAC	5	0.000581328		CTAACA	1	0.000194553	CGCCTT	1	0.000152462	GGAGAA	0	0	GTCAAT	0	0		TTACTC	31	0.0878187	AGACGT	9	0.0218447	GAGCTG	1	0.00222222	CTATGA	1	0.000376081		TAGAGA	6	0.0013708	TCGATT	6	0.0016488	CGAGCC	1	0.000268312	GCGCCC	1
TGTCAT	335	0.099851	TGTCTA	54	0.0575693	GGGCAG	2	0.0107527	TCCACT	5	0.000581328		ACTGAC	1	0.000194553	CGCGAT	1	0.000152462	AGAGAA	0	0	CTAACA	0	0		CTAGTT	31	0.0878187	TTGGGT	9	0.0218447	TATTAC	1	0.00222222	CTATCA	1	0.000376081		CTACCA	6	0.0013708	TTACCT	6	0.0016488	TGCACT	1	0.000268312	GGGGCT	1
TGCGCG	334	0.0995529	ATGCCG	54	0.0575693	CGTTCA	2	0.0107527	TCTGCG	5	0.000581328		CTTTTG	1	0.000194553	CGCTGC	1	0.000152462	GATCAC	0	0	GATAGG	0	0		AGACAC	31	0.0878187	TCGTAA	9	0.0218447	CAGTAC	1	0.00222222	GGCTGG	1	0.000376081		GCCGCG	6	0.0013708	CTTTCC	6	0.0016488	GGGGCC	1	0.000268312	ACTGCG	1
CTTATC	334	0.0995529	TAACAC	54	0.0575693	GTGTGA	2	0.0107527	TCGCAG	5	0.000581328		CTTTTT	1	0.000194553	CGCGAG	1	0.000152462	AGATTA	0	0	GATCAC	0	0		TGTCCC	31	0.0878187	GGTGCG	9	0.0218447	GTGGGC	1	0.00222222	AAACAA	1	0.000376081		TACATT	6	0.0013708	GTAGCA	6	0.0016488	GGGCCC	1	0.000268312	GCGGTC	1
CTCCAT	334	0.0995529	TTGAGA	54	0.0575693	CCTGCG	2	0.0107527	AATACA	5	0.000581328		GACTTC	1	0.000194553	CGGTTG	1	0.000152462	GATACT	0	0	CGCTAA	0	0		ATGCTC	31	0.0878187	GAGACC	9	0.0218447	GGCCTG	1	0.00222222	CGTGCC	1	0.000376081		GTAGCC	6	0.0013708	TCCAGT	6	0.0016488	GGGTCT	1	0.000268312	GCGACA	1
GTGAGC	333	0.0992548	TAGGAG	54	0.0575693	CTGGGG	2	0.0107527	TCGTCC	5	0.000581328		TCCATA	1	0.000194553	CGCAAT	1	0.000152462	GATACG	0	0	GATATT	0	0		GCGCAT	31	0.0878187	ATGATC	9	0.0218447	ATGCTC	1	0.00222222	AGGCAT	1	0.000376081		TCCATA	6	0.0013708	TTCCTG	6	0.0016488	TACGCT	1	0.000268312	GCCATC	1
TACAGT	333	0.0992548	TCGTGC	53	0.0565032	ATGGCG	2	0.0107527	CCAGTC	5	0.000581328		GATAAT	1	0.000194553	TGTCTA	1	0.000152462	GATACC	0	0	GATATG	0	0		TAGGTT	31	0.0878187	TCGAAT	9	0.0218447	CTACGA	1	0.00222222	CATACA	1	0.000376081		TAGTTG	5	0.00114233	TACCTC	6	0.0016488	CAAGCT	1	0.000268312	GCATCA	1
ATACAG	333	0.0992548	TGACCA	53	0.0565032	CTCCCA	2	0.0107527	ACTGCT	5	0.000581328		GAGGCC	1	0.000194553	CGGTGC	1	0.000152462	TTCTTA	0	0	CACATA	0	0		TGCAAA	31	0.0878187	TACACG	9	0.0218447	GAATGT	1	0.00222222	CATTCT	1	0.000376081		TCCAGT	5	0.00114233	TACCCC	6	0.0016488	TTACTT	1	0.000268312	GTACCC	1
TGGTCT	332	0.0989568	TATTCC	53	0.0565032	TGCAGG	2	0.0107527	TGGATA	5	0.000581328		TAAACC	1	0.000194553	CGGTGG	1	0.000152462	GATAGT	0	0	GATGCC	0	0		ATACAC	31	0.0878187	TTAACG	9	0.0218447	TCAAAT	1	0.00222222	CATTTC	1	0.000376081		CTATCT	5	0.00114233	CTGGGT	6	0.0016488	AGACAA	1	0.000268312	GCCTAA	1
TGGCTA	332	0.0989568	ATAGCA	53	0.0565032	CTTGGT	2	0.0107527	TCTCGG	5	0.000581328		TAAGCA	1	0.000194553	TGGATA	1	0.000152462	GATAGG	0	0	TGCTTC	0	0		TCGTAA	31	0.0878187	TACTAT	9	0.0218447	AAGTGC	1	0.00222222	CATGTT	1	0.000376081		TAGGCT	5	0.00114233	TACATA	6	0.0016488	GATCGC	1	0.000268312	GCCGCT	1
TAACGC	332	0.0989568	GGGCAG	53	0.0565032	GCCCTT	2	0.0107527	ATGAGG	5	0.000581328		CAGATG	1	0.000194553	CATGCT	1	0.000152462	GATAGC	0	0	GATGAT	0	0		CCGACG	31	0.0878187	TTCTCG	9	0.0218447	CTTGGG	1	0.00222222	TCGCTA	1	0.000376081		TAGTTC	5	0.00114233	GTTACG	6	0.0016488	AAGAGC	1	0.000268312	GCCCAA	1
GCGTCA	332	0.0989568	CTTGTA	52	0.0554371	ATCTGT	2	0.0107527	TGAAGT	5	0.000581328		GATACT	1	0.000194553	CGTAAG	1	0.000152462	TGCACT	0	0	GATGGG	0	0		GAGACC	31	0.0878187	ATGCCG	8	0.0194175	GGGACT	1	0.00222222	TAGATG	1	0.000376081		TTTTGT	5	0.00114233	CCACTT	6	0.0016488	AGAATC	1	0.000268312	AATTAC	1
TGTCAC	332	0.0989568	CTCCAC	52	0.0554371	TGTGGG	2	0.0107527	TCTTGC	5	0.000581328		CGAGAT	1	0.000194553	CGCAAC	1	0.000152462	CGCGTA	0	0	GATGGC	0	0		TTCCGA	31	0.0878187	ACAAAC	8	0.0194175	TCGTAT	1	0.00222222	AGACGT	1	0.000376081		GTGGCC	5	0.00114233	ATCCGG	6	0.0016488	TAGCTG	1	0.000268312	GGATTC	1
TATAAG	332	0.0989568	TTTGGA	52	0.0554371	CAGTTT	2	0.0107527	CATTAC	5	0.000581328		GAATCG	1	0.000194553	CGATTG	1	0.000152462	GATCTG	0	0	GATCTA	0	0		GCGACT	31	0.0878187	TAGTGG	8	0.0194175	ATGTTT	1	0.00222222	CTACAT	1	0.000376081		TATAAT	5	0.00114233	TGTGAA	6	0.0016488	GCGCAA	1	0.000268312	CTGTCG	1
CCCCCG	332	0.0989568	ATGGTA	52	0.0554371	GGGATC	2	0.0107527	CGATGT	5	0.000581328		GGCTTA	1	0.000194553	CGATGT	1	0.000152462	GATCTC	0	0	GATGCT	0	0		CTTGAT	31	0.0878187	TATAAT	8	0.0194175	GGGATT	1	0.00222222	ATGATT	1	0.000376081		TTTAGA	5	0.00114233	CTGCGA	6	0.0016488	GTGTGG	1	0.000268312	GGAGTT	1
ATACTG	332	0.0989568	CTACAG	52	0.0554371	TGTGGC	2	0.0107527	TATTGC	5	0.000581328		GATACG	1	0.000194553	CGCCGA	1	0.000152462	GTCCAC	0	0	GATCTG	0	0		TGTTGT	31	0.0878187	CATCCA	8	0.0194175	ATGGCG	1	0.00222222	CACTAT	1	0.000376081		CATGCT	5	0.00114233	GTGGTG	6	0.0016488	TGGTCC	1	0.000268312	GGCCAC	1
GGCGCG	332	0.0989568	CTGCTT	52	0.0554371	TCCCAC	2	0.0107527	TGATTG	5	0.000581328		GTGTCT	1	0.000194553	GCAATA	1	0.000152462	GATGAT	0	0	GATCTC	0	0		TTTGGC	30	0.0849858	TAGAGG	8	0.0194175	GTGCCC	1	0.00222222	CACTGC	1	0.000376081		AGGCGT	5	0.00114233	TTACTA	6	0.0016488	GCGCAG	1	0.000268312	AGAAGG	1
GGACGT	332	0.0989568	TACGCA	51	0.054371	GGGGAG	2	0.0107527	TCAGCC	5	0.000581328		GAGTCT	1	0.000194553	CGGTCG	1	0.000152462	TTATTA	0	0	TCCTGA	0	0		TTCTCC	30	0.0849858	TTCGCG	8	0.0194175	ATTAAC	1	0.00222222	TGTAAT	1	0.000376081		CATGTT	5	0.00114233	TTCCGA	6	0.0016488	TGAGGT	1	0.000268312	GGATTT	1
TTAAAC	331	0.0986587	TTTACC	51	0.054371	GGGCCG	2	0.0107527	CCGCGG	5	0.000581328		GACAGC	1	0.000194553	CGGCTT	1	0.000152462	GATGAC	0	0	GATCGT	0	0		TGCACG	30	0.0849858	CGTGAC	8	0.0194175	TACAAT	1	0.00222222	CTACAG	1	0.000376081		TGTTCT	5	0.00114233	GAGCAC	6	0.0016488	CTGACT	1	0.000268312	GGAGGC	1
TTGGCT	331	0.0986587	TCGACC	51	0.054371	TGTTTC	2	0.0107527	AGTAGA	5	0.000581328		GACAAG	1	0.000194553	GCCCGC	1	0.000152462	TGCCTA	0	0	GATGAG	0	0		CTGTCT	30	0.0849858	TGTCAA	8	0.0194175	CAGCGT	1	0.00222222	GTTCTA	1	0.000376081		TACCGC	5	0.00114233	CTGAAT	6	0.0016488	AGACGA	1	0.000268312	GTTGAG	1
TAGGTG	331	0.0986587	GTACCC	51	0.054371	GACAAT	2	0.0107527	TCACAG	5	0.000581328		GCTAAG	1	0.000194553	AAGGTA	1	0.000152462	GATCCT	0	0	GATGAC	0	0		GTTGCA	30	0.0849858	ATACAA	8	0.0194175	CACGAG	1	0.00222222	CAGCTC	1	0.000376081		ACGGTT	5	0.00114233	TGCATC	6	0.0016488	AAGACA	1	0.000268312	TCGCCG	1
CTTACC	331	0.0986587	TGTCGG	50	0.0533049	ATGATC	2	0.0107527	ACTTGT	5	0.000581328		GAGGTG	1	0.000194553	CGCACT	1	0.000152462	GATCCG	0	0	GTGAGC	0	0		GCGCGC	30	0.0849858	CACACA	8	0.0194175	GTCACT	1	0.00222222	CGTTTC	1	0.000376081		TTAACC	5	0.00114233	TGTTCC	6	0.0016488	ACTACT	1	0.000268312	TGCTTA	1
CGTCAC	331	0.0986587	TATATA	50	0.0533049	CAGCCA	2	0.0107527	GCAAGT	5	0.000581328		GACAAT	1	0.000194553	CGCACC	1	0.000152462	GATCCC	0	0	GATCTT	0	0		CTACTA	30	0.0849858	TTCATG	8	0.0194175	GACAGC	1	0.00222222	TGCGGA	1	0.000376081		TTCTGA	5	0.00114233	TGCCCG	6	0.0016488	TGGGGC	1	0.000268312	TACATT	1
CTATTG	330	0.0983607	ATACAC	50	0.0533049	TCCCGC	2	0.0107527	GTGCGA	5	0.000581328		GAATGG	1	0.000194553	CGCAGT	1	0.000152462	CCATTA	0	0	GAATCC	0	0		TTACCG	30	0.0849858	TTACCA	8	0.0194175	TCGGTG	1	0.00222222	TCGTCC	1	0.000376081		TCGCTC	5	0.00114233	GTCTAA	6	0.0016488	AAGCGT	1	0.000268312	GTGTTG	1
TTCATG	330	0.0983607	TGCCCA	50	0.0533049	TGTTAC	2	0.0107527	TGGTCT	5	0.000581328		GACAGT	1	0.000194553	CGGGCC	1	0.000152462	GACAGA	0	0	CCCAGC	0	0		GGACAT	30	0.0849858	TTCTCC	8	0.0194175	GTTCTC	1	0.00222222	TCGTAA	1	0.000376081		TGTGTG	5	0.00114233	CGGGGG	6	0.0016488	GAGGGG	1	0.000268312	GCTTAT	1
TTCTAC	329	0.0980626	GGGCGA	49	0.0522388	GGGGCG	2	0.0107527	CTAACA	5	0.000581328		GACATT	1	0.000194553	TTTCCT	1	0.000152462	TCGCTA	0	0	AATAAA	0	0		TGACCG	29	0.082153	GCTGTG	8	0.0194175	TGTTCG	1	0.00222222	TCGGGC	1	0.000376081		TCAGCA	5	0.00114233	TTACGC	6	0.0016488	ACGAGC	1	0.000268312	CGACAG	1
TGTAAT	329	0.0980626	ATACCC	49	0.0522388	AGACTT	2	0.0107527	GTGAAG	5	0.000581328		GACAGG	1	0.000194553	CGTCGA	1	0.000152462	GATCGC	0	0	GAATAG	0	0		TGTGAA	29	0.082153	CAGACG	8	0.0194175	AAGACT	1	0.00222222	TCCTGT	1	0.000376081		GTGTCG	5	0.00114233	TAGGGC	5	0.001374	TTCTCC	1	0.000268312	ATTGTG	1
CCGCAC	329	0.0980626	GTTTTC	49	0.0522388	GCCATG	2	0.0107527	GGTTAG	5	0.000581328		TGTATA	1	0.000194553	CCGGCG	1	0.000152462	GAATAG	0	0	GAATGC	0	0		CTACCG	29	0.082153	TACCTA	8	0.0194175	CTGACC	1	0.00222222	TGATAC	1	0.000376081		GCCGCT	5	0.00114233	GGTTGG	5	0.001374	TGATTA	1	0.000268312	GAACTA	1
ATGCTA	327	0.0974665	GAGCAC	49	0.0522388	GGGCGC	2	0.0107527	AACTGA	5	0.000581328		CGTATT	1	0.000194553	CTGTAG	1	0.000152462	ATGATA	0	0	TACTCC	0	0		AGACGG	29	0.082153	TCGTCT	8	0.0194175	CCACAG	1	0.00222222	TCTCAC	1	0.000376081		TGTTAC	5	0.00114233	GCGGGG	5	0.001374	TAGCCG	1	0.000268312	GAACCA	1
TAGCGA	327	0.0974665	TTGAGT	48	0.0511727	TTAACT	2	0.0107527	AATTTA	5	0.000581328		GAGCTT	1	0.000194553	CTGTAT	1	0.000152462	GAAGTT	0	0	GAATCT	0	0		TAGATA	29	0.082153	GTACAC	8	0.0194175	ACGTCG	1	0.00222222	GACCTG	1	0.000376081		TTACGC	5	0.00114233	TCACCT	5	0.001374	TGGTAC	1	0.000268312	CAGAGT	1
TACATA	327	0.0974665	TAACAT	48	0.0511727	CGACAG	2	0.0107527	ATCTAC	5	0.000581328		GATCAC	1	0.000194553	ATCTGA	1	0.000152462	GAAGTG	0	0	AGCCGA	0	0		TACTAA	29	0.082153	CTATCA	8	0.0194175	GGGACC	1	0.00222222	TCGTGT	1	0.000376081		TGCTGC	5	0.00114233	GCGCGG	5	0.001374	TTCTGT	1	0.000268312	GACCTT	1
CAGCGT	327	0.0974665	TATCTG	48	0.0511727	TGTCAC	2	0.0107527	GGGCTG	5	0.000581328		GATCAT	1	0.000194553	CCGCTC	1	0.000152462	AATCTA	0	0	GAAGTC	0	0		CTAGAG	29	0.082153	TATCAG	8	0.0194175	CAAATG	1	0.00222222	CTGCGC	1	0.000376081		ATGGAT	5	0.00114233	ATACAC	5	0.001374	TGATCT	1	0.000268312	CTATAA	1
TGCCAT	327	0.0974665	TGGGCT	48	0.0511727	TCCTTG	2	0.0107527	CGCGGT	5	0.000581328		TACGCA	1	0.000194553	CCGCGC	1	0.000152462	GAATCC	0	0	TCCAAC	0	0		GCAACC	29	0.082153	CTATCG	8	0.0194175	CTGAGA	1	0.00222222	GAGGCG	1	0.000376081		CTCTTA	5	0.00114233	TGCTAT	5	0.001374	TCCAGG	1	0.000268312	TCCGGG	1
TGCGTC	326	0.0971684	ATGAAG	47	0.0501066	TTAATC	2	0.0107527	ATGTAC	5	0.000581328		CGGTAG	1	0.000194553	CCGGGT	1	0.000152462	ATGTAC	0	0	GAGCGA	0	0		TGGAGA	29	0.082153	CTAGGC	8	0.0194175	GTCGCG	1	0.00222222	TAGAGA	1	0.000376081		CTACCC	5	0.00114233	ATGTCA	5	0.001374	TTCTGC	1	0.000268312	CTTTAA	1
GTGATC	326	0.0971684	TGCCAG	47	0.0501066	TCCTAG	2	0.0107527	GTGCGG	5	0.000581328		GAGCGG	1	0.000194553	CCGGGG	1	0.000152462	ACCAAA	0	0	GAAGGG	0	0		TTTAGC	29	0.082153	AGACGC	8	0.0194175	CTCGCA	1	0.00222222	TCGCGT	1	0.000376081		ATAATT	5	0.00114233	TGTTTT	5	0.001374	GCCATT	1	0.000268312	CTTCCC	1
AAGCGC	326	0.0971684	TGTCTC	47	0.0501066	ACAGTT	2	0.0107527	GTGTCC	5	0.000581328		CAAAAG	1	0.000194553	TCGACA	1	0.000152462	GAAGGC	0	0	CGCCGA	0	0		CTGCCA	29	0.082153	CTCGCA	8	0.0194175	CGTGCT	1	0.00222222	TCGCGA	1	0.000376081		CCATAG	5	0.00114233	GTTACT	5	0.001374	TTAATA	1	0.000268312	TACACG	1
AGACTT	325	0.0968703	CGCACA	47	0.0501066	AGGAGA	2	0.0107527	CGCCGT	5	0.000581328		CATGCA	1	0.000194553	ACCTAT	1	0.000152462	CGTTCC	0	0	GTCGTC	0	0		TCGTCG	29	0.082153	CTGCGT	8	0.0194175	GTGGTG	1	0.00222222	TCGATT	1	0.000376081		GGGATT	5	0.00114233	TTCTCC	5	0.001374	GTTCGA	1	0.000268312	CTTTTC	1
TTGGAG	325	0.0968703	AGACTA	47	0.0501066	AGTCGC	2	0.0107527	TCTACG	5	0.000581328		TTCTAC	1	0.000194553	CCGTAT	1	0.000152462	GAAGCT	0	0	GAAGTT	0	0		TACCAA	29	0.082153	GGAACA	8	0.0194175	TACAAG	1	0.00222222	TCGAGT	1	0.000376081		TAACGC	5	0.00114233	GCGGCA	5	0.001374	AGAGTC	1	0.000268312	TATATG	1
TGGATA	325	0.0968703	CGTAGC	47	0.0501066	GCTGAT	2	0.0107527	GTTAAT	5	0.000581328		GAGCGC	1	0.000194553	TCCCCG	1	0.000152462	AAAACA	0	0	GAAGTG	0	0		TTCATC	29	0.082153	CTCCAG	8	0.0194175	GTAGTT	1	0.00222222	TGATAA	1	0.000376081		TGGGCC	5	0.00114233	TGCCGA	5	0.001374	TATCGG	1	0.000268312	CTTTAT	1
TCTACC	325	0.0968703	GGGCAC	47	0.0501066	GGGTCA	2	0.0107527	GTGACC	5	0.000581328		AAAGGA	1	0.000194553	TATCTA	1	0.000152462	ACCACA	0	0	CTACTA	0	0		CTTTCT	29	0.082153	TGCAAA	7	0.0169903	ATTCAA	1	0.00222222	AAGTAA	1	0.000376081		GCTGGG	5	0.00114233	TCAGCG	5	0.001374	AACCTT	1	0.000268312	GAAAGT	1
TTTGGG	325	0.0968703	AGACGC	47	0.0501066	GGCGGG	2	0.0107527	TGGGGC	5	0.000581328		GATCCG	1	0.000194553	TTAACA	1	0.000152462	TAGTAA	0	0	TGTTTT	0	0		CTATTC	29	0.082153	TGCCAG	7	0.0169903	CTTTGA	1	0.00222222	CTAGAG	1	0.000376081		TAATGC	5	0.00114233	GACAGT	5	0.001374	TGCCAT	1	0.000268312	GATCTA	1
GTTCGT	324	0.0965723	CTGCTA	47	0.0501066	CGACCG	2	0.0107527	TGGTCC	5	0.000581328		GACGTC	1	0.000194553	CTGCAG	1	0.000152462	GAAGGT	0	0	GTTACA	0	0		GTTGGA	29	0.082153	TATTAA	7	0.0169903	TTCTGG	1	0.00222222	GGGAGG	1	0.000376081		AAAGTC	5	0.00114233	GGGGGC	5	0.001374	TGACGT	1	0.000268312	CATATT	1
CACTCA	324	0.0965723	AGGACT	46	0.0490405	TTCAAG	2	0.0107527	ATTAAT	5	0.000581328		GACCGT	1	0.000194553	CTGGGC	1	0.000152462	GTTGAA	0	0	GAGGGA	0	0		TGCACA	29	0.082153	TAGTGA	7	0.0169903	TAGAGG	1	0.00222222	GTTGGG	1	0.000376081		CCGGGC	5	0.00114233	TCCCAC	5	0.001374	ACGCTG	1	0.000268312	GATACA	1
CGCCCG	324	0.0965723	TTGGCA	46	0.0490405	GACACT	2	0.0107527	TGTCTC	5	0.000581328		GTTACC	1	0.000194553	CCCGAC	1	0.000152462	GACAAG	0	0	GACAGC	0	0		CTCCCA	29	0.082153	ATGCCA	7	0.0169903	TGTAAT	1	0.00222222	TGATGT	1	0.000376081		CCCCAC	5	0.00114233	TATTCG	5	0.001374	TCCAAT	1	0.000268312	GCAATT	1
CTGATG	324	0.0965723	GTCGCG	46	0.0490405	GTGTTT	2	0.0107527	GTGGTA	5	0.000581328		GAAGCT	1	0.000194553	CTGCGG	1	0.000152462	GACAAC	0	0	TCTACC	0	0		TATAAT	29	0.082153	GATCTA	7	0.0169903	AAGCGG	1	0.00222222	TGATCA	1	0.000376081		CTCTAA	5	0.00114233	TATTCC	5	0.001374	TTGGTC	1	0.000268312	GATTAA	1
GTACTC	323	0.0962742	TCCCAC	46	0.0490405	TTAGGG	2	0.0107527	TGGTGG	5	0.000581328		TAATTT	1	0.000194553	ACTAGC	1	0.000152462	GCCGCT	0	0	TCGCTA	0	0		ATGGCG	29	0.082153	AAGACT	7	0.0169903	GGCTAG	1	0.00222222	TACCCG	1	0.000376081		TACCGG	5	0.00114233	TGTCCG	5	0.001374	CTTAAG	1	0.000268312	CCCATG	1
AGGCGC	323	0.0962742	TACTCG	46	0.0490405	ATGTTC	2	0.0107527	GGTCGA	5	0.000581328		GACCGG	1	0.000194553	CTGGCC	1	0.000152462	GAATTT	0	0	GTATTA	0	0		TATTCC	28	0.0793201	GAGCGC	7	0.0169903	CCGCAC	1	0.00222222	TCTTTT	1	0.000376081		GAGCAC	5	0.00114233	ACCATT	5	0.001374	GCCAGT	1	0.000268312	GAGGTT	1
TATCGT	323	0.0962742	TTGTAT	45	0.0479744	TGTCGC	2	0.0107527	CGGACG	4	0.000465062		AAAAGG	1	0.000194553	CTTGTG	1	0.000152462	TGCACA	0	0	GTGCAA	0	0		GTACAT	28	0.0793201	GCCTGC	7	0.0169903	TCGAAC	1	0.00222222	TTCCGG	1	0.000376081		ACAAGT	5	0.00114233	TGGGGT	5	0.001374	CTTGGT	1	0.000268312	GAGCGA	1
CTCCGT	323	0.0962742	TTTACG	45	0.0479744	CCGACG	2	0.0107527	TCTTGG	4	0.000465062		GAAGAT	1	0.000194553	CATTTC	1	0.000152462	CCCCGA	0	0	AAGCGT	0	0		ATGCTA	28	0.0793201	CTTGGT	7	0.0169903	TGTGAT	1	0.00222222	TGACTA	1	0.000376081		TGCCTG	5	0.00114233	GTGTTA	5	0.001374	ACCGAA	1	0.000268312	GAGAGA	1
GTGAAC	323	0.0962742	CTGTAG	45	0.0479744	GTGGTC	2	0.0107527	CTGCAC	4	0.000465062		GAACTT	1	0.000194553	TCCGCC	1	0.000152462	GTGATT	0	0	GAATGT	0	0		GTGTCC	28	0.0793201	GCAACC	7	0.0169903	CATATC	1	0.00222222	TGACGC	1	0.000376081		ATCGCC	5	0.00114233	TGTTGT	5	0.001374	ATTACA	1	0.000268312	GAGACA	1
TCACTT	323	0.0962742	GTAGAG	45	0.0479744	GGGGGT	2	0.0107527	CTTATG	4	0.000465062		GATATC	1	0.000194553	CTTGCT	1	0.000152462	GACAAT	0	0	GAATGG	0	0		AAGACA	28	0.0793201	GATCAT	7	0.0169903	GTATCA	1	0.00222222	TGACGA	1	0.000376081		ATGCGT	5	0.00114233	GTTAAG	5	0.001374	CTGAAT	1	0.000268312	GAGGAC	1
TGTATA	323	0.0962742	TTTGGT	45	0.0479744	ACTTCA	2	0.0107527	ATGCGG	4	0.000465062		CGAGTA	1	0.000194553	CCGAGG	1	0.000152462	GAATGG	0	0	GACAAC	0	0		CTTACG	28	0.0793201	GGCGTT	7	0.0169903	GAGCAC	1	0.00222222	TGACCA	1	0.000376081		GGCGGG	5	0.00114233	GTGTCG	5	0.001374	AACTGC	1	0.000268312	GAGCTT	1
GGTGTG	323	0.0962742	GTTGAT	45	0.0479744	CTGGGC	2	0.0107527	CGGGAG	4	0.000465062		ATCTCA	1	0.000194553	GCACGA	1	0.000152462	CAAAAA	0	0	ATATGT	0	0		TTCTAC	28	0.0793201	CTACCG	7	0.0169903	TGTGCC	1	0.00222222	ACCGCG	1	0.000376081		TGTTTA	5	0.00114233	TCGTCT	5	0.001374	CTTGGA	1	0.000268312	GAGCGT	1
TATCGG	323	0.0962742	TACTCC	44	0.0469083	TTAGTT	2	0.0107527	CCGGCC	4	0.000465062		TCCCAC	1	0.000194553	GGGAGT	1	0.000152462	CTCCCA	0	0	GAATTT	0	0		CTACAT	28	0.0793201	CGATGC	7	0.0169903	TATCTC	1	0.00222222	TTTATG	1	0.000376081		TGTATC	5	0.00114233	TGCAAT	5	0.001374	TGGTTA	1	0.000268312	CTTCAC	1
GTTCCG	323	0.0962742	TGTCCG	44	0.0469083	TCCTCT	2	0.0107527	CACTTC	4	0.000465062		CGAGAG	1	0.000194553	TAAATA	1	0.000152462	GAATCT	0	0	CTGATA	0	0		TCCCAA	28	0.0793201	TGCCCT	7	0.0169903	CTCGGC	1	0.00222222	TACCTT	1	0.000376081		CATCAA	5	0.00114233	CGACGG	5	0.001374	AAAGGG	1	0.000268312	TAGTAG	1
GCCCGC	322	0.0959762	TGCAAG	44	0.0469083	GTGTAG	2	0.0107527	GCTATA	4	0.000465062		CGCCGC	1	0.000194553	GGCTAC	1	0.000152462	CACAGA	0	0	CCGTTT	0	0		TTAGCA	28	0.0793201	GTGTGA	7	0.0169903	ACCAAG	1	0.00222222	TCTTTA	1	0.000376081		GTCTAA	5	0.00114233	TTTAGA	5	0.001374	AGACTA	1	0.000268312	GTCTAC	1
GGGACG	322	0.0959762	TTATGG	44	0.0469083	TGTCGT	2	0.0107527	CCATGC	4	0.000465062		CTATTA	1	0.000194553	CTTTAG	1	0.000152462	GAATTC	0	0	GAACAT	0	0		CGACAA	28	0.0793201	CTCGAG	7	0.0169903	GATGCT	1	0.00222222	GTGGGG	1	0.000376081		TGCCCT	5	0.00114233	ATGACC	5	0.001374	TTACTA	1	0.000268312	GTGCTC	1
TGCACT	321	0.0956781	CAGCAT	43	0.0458422	CCCTGT	2	0.0107527	CTGAGC	4	0.000465062		CCTTCT	1	0.000194553	CCGAAC	1	0.000152462	TGATGG	0	0	GAACAG	0	0		TACAAC	28	0.0793201	GTTGGA	7	0.0169903	TACCTG	1	0.00222222	TAGCTA	1	0.000376081		TATTAA	5	0.00114233	CTACAA	5	0.001374	GTGCTG	1	0.000268312	GTGCTA	1
ATAGCC	321	0.0956781	CCGACG	43	0.0458422	ATCCAC	2	0.0107527	CTGAGG	4	0.000465062		CGACTT	1	0.000194553	ATAGCA	1	0.000152462	GAATGT	0	0	GTGTCA	0	0		TGCCAC	28	0.0793201	GTTCAC	7	0.0169903	TGCCAG	1	0.00222222	TAGAGT	1	0.000376081		ATCCGG	5	0.00114233	ATGAAT	5	0.001374	AACGCT	1	0.000268312	GACGTG	1
ATGATG	321	0.0956781	TTCGAC	43	0.0458422	CGAACA	2	0.0107527	CCATAC	4	0.000465062		CGAGAC	1	0.000194553	CTTCCG	1	0.000152462	CGTGCA	0	0	GTACGC	0	0		TTCATA	28	0.0793201	GTGATG	7	0.0169903	TACACG	1	0.00222222	TACCGA	1	0.000376081		TGCGCT	5	0.00114233	GCTTAC	5	0.001374	CTCATT	1	0.000268312	GTCTAA	1
TAGAAT	320	0.09538	CTACTC	43	0.0458422	AGCCCT	2	0.0107527	CCAGGG	4	0.000465062		CGATGT	1	0.000194553	CCGAGT	1	0.000152462	AGCTGA	0	0	CCGGCA	0	0		TGATAA	28	0.0793201	GTGTAG	7	0.0169903	GTTAAC	1	0.00222222	TACCCA	1	0.000376081		TACTTT	5	0.00114233	ATTACA	5	0.001374	CTGAAA	1	0.000268312	GTCCTA	1
ATGTGA	320	0.09538	GTACTC	43	0.0458422	TGCTGT	2	0.0107527	CCGTGG	4	0.000465062		CGATTG	1	0.000194553	CCGCAT	1	0.000152462	CAGAAA	0	0	GCTTAA	0	0		CTGTCG	28	0.0793201	ATGTAC	7	0.0169903	CCGATT	1	0.00222222	GCGCCA	1	0.000376081		GTTTCT	5	0.00114233	CATCTC	5	0.001374	GCGTGC	1	0.000268312	CCGGTG	1
GTACGG	320	0.09538	GTGAGA	43	0.0458422	TAACAT	2	0.0107527	ATTTTG	4	0.000465062		GAAGAC	1	0.000194553	CTTAGC	1	0.000152462	GAAATG	0	0	GAACCC	0	0		TACCTC	27	0.0764873	ATGATT	7	0.0169903	ACACGT	1	0.00222222	TACTGT	1	0.000376081		CAGGGG	5	0.00114233	TTCTCG	5	0.001374	GACTGT	1	0.000268312	GTCCAC	1
TTATCC	320	0.09538	TACATA	43	0.0458422	AAAAGT	2	0.0107527	CGCCTG	4	0.000465062		CGAGTT	1	0.000194553	CTTCAG	1	0.000152462	GAACCC	0	0	GATGCA	0	0		TTAGCC	27	0.0764873	AGACTT	7	0.0169903	ATGAAC	1	0.00222222	TACTCT	1	0.000376081		GGCGGT	5	0.00114233	TGGTCC	5	0.001374	GGACAG	1	0.000268312	GGCTCG	1
TCACTG	320	0.09538	GTGACT	43	0.0458422	TGCCCG	2	0.0107527	ATTGAG	4	0.000465062		CGATAG	1	0.000194553	CTTCTT	1	0.000152462	ATCTCT	0	0	GAAAGT	0	0		ATGCCT	27	0.0764873	TATATT	7	0.0169903	TGGGTC	1	0.00222222	TACGCT	1	0.000376081		ATTCCC	5	0.00114233	GCGCCG	5	0.001374	TTCATA	1	0.000268312	GCTCTA	1
TGTGTA	320	0.09538	CTAGAC	43	0.0458422	TAATGC	2	0.0107527	TGCTGG	4	0.000465062		CGATCC	1	0.000194553	CTTGAG	1	0.000152462	GAACAT	0	0	ATCAGA	0	0		TAGTGA	27	0.0764873	CTTCCG	7	0.0169903	CATCTA	1	0.00222222	TACGCC	1	0.000376081		TTGGGG	5	0.00114233	GCCAAA	5	0.001374	ATTCTG	1	0.000268312	GTCGAC	1
TCCCAT	319	0.095082	CTGCTG	42	0.0447761	TGCGTG	2	0.0107527	CCGCCA	4	0.000465062		CCTTGG	1	0.000194553	CTTCGG	1	0.000152462	GAACAG	0	0	CGCCTA	0	0		CTACCC	27	0.0764873	TCCCAT	7	0.0169903	ATCTTC	1	0.00222222	TCACAA	1	0.000376081		TTATCT	5	0.00114233	CGTACC	5	0.001374	CTAAAC	1	0.000268312	TAACTC	1
TGTTGA	319	0.095082	GTAGGC	42	0.0447761	TACTAT	2	0.0107527	CTTCAC	4	0.000465062		CGAAAC	1	0.000194553	AATCGG	1	0.000152462	GAAAGC	0	0	AGGAAA	0	0		TTCAAG	27	0.0764873	TGGGCG	7	0.0169903	AACTAT	1	0.00222222	TCAAGA	1	0.000376081		GTTAAC	5	0.00114233	TGCTAA	5	0.001374	TTATCT	1	0.000268312	CGCTCG	1
TCGTGG	319	0.095082	AGGGCT	42	0.0447761	TGAGTT	2	0.0107527	CTGTTT	4	0.000465062		CCTGGC	1	0.000194553	CTTCGT	1	0.000152462	GCTGGA	0	0	GAAATT	0	0		AGACGT	27	0.0764873	CACCTC	7	0.0169903	ATGAAT	1	0.00222222	TATCTC	1	0.000376081		GATCTC	5	0.00114233	TCCTCA	5	0.001374	AGGCTC	1	0.000268312	CATCCT	1
ATGTCT	319	0.095082	AGGCGC	42	0.0447761	CCGAGC	2	0.0107527	TCGCCT	4	0.000465062		CCTTAT	1	0.000194553	CTTCTG	1	0.000152462	GAAACT	0	0	GAAATG	0	0		GATGCG	27	0.0764873	CCTTCA	7	0.0169903	GTAATG	1	0.00222222	TCCGCT	1	0.000376081		TTCTTT	5	0.00114233	TAAGGC	5	0.001374	CCCCCG	1	0.000268312	GTTGGC	1
AGTGCG	319	0.095082	ATGACA	42	0.0447761	CTCTAG	2	0.0107527	CTGCTG	4	0.000465062		GAATCA	1	0.000194553	CTTGCA	1	0.000152462	GATTCA	0	0	GAAATC	0	0		GGGCAC	27	0.0764873	TGTCAC	7	0.0169903	TGGGCC	1	0.00222222	TTAGCT	1	0.000376081		GTCGTC	5	0.00114233	TTAACT	5	0.001374	CTGGGT	1	0.000268312	TAACCT	1
TCGCGT	318	0.0947839	CAGACA	42	0.0447761	CTATTA	2	0.0107527	CCCGCT	4	0.000465062		CGACAC	1	0.000194553	CTCATT	1	0.000152462	GAAATC	0	0	TCCGCA	0	0		GTGATG	27	0.0764873	TGTTTT	7	0.0169903	CCCTGT	1	0.00222222	TCCAAC	1	0.000376081		CTGCGC	5	0.00114233	ATACAT	5	0.001374	TTCCCC	1	0.000268312	TAAAAT	1
TACTCG	318	0.0947839	ATCCAC	41	0.04371	GGGCCA	2	0.0107527	CCCCAC	4	0.000465062		GTCTCT	1	0.000194553	CGCGAC	1	0.000152462	TGACGT	0	0	GAAGAT	0	0		TAGGAC	27	0.0764873	CTGTCT	7	0.0169903	TATGTA	1	0.00222222	GGTGAG	1	0.000376081		TTACGT	5	0.00114233	GTAGAA	5	0.001374	CGACAG	1	0.000268312	GTTTCA	1
TTATTA	318	0.0947839	CCCCAC	41	0.04371	CGTAGC	2	0.0107527	CGGACC	4	0.000465062		TCAGCA	1	0.000194553	CTCCGG	1	0.000152462	GAAAGT	0	0	TGCCCA	0	0		CTTCAT	27	0.0764873	TACTCT	7	0.0169903	CATATA	1	0.00222222	TATCCC	1	0.000376081		CGCAGG	5	0.00114233	TACACG	5	0.001374	GTGGCG	1	0.000268312	ATGCGG	1
CCCACG	317	0.0944858	TTGTCC	41	0.04371	TCTTGA	2	0.0107527	ATTTTA	4	0.000465062		CCACTA	1	0.000194553	GGCCCT	1	0.000152462	GAAAGG	0	0	GAAGAC	0	0		GGGACT	27	0.0764873	AGACTA	7	0.0169903	CCGTAG	1	0.00222222	TATATT	1	0.000376081		CACGCA	5	0.00114233	GCGCTT	5	0.001374	TGCCGA	1	0.000268312	GTGGTT	1
TGTTGT	317	0.0944858	GCGCAT	41	0.04371	AGGCTT	2	0.0107527	CCCCAG	4	0.000465062		CGAAGT	1	0.000194553	TTTAAA	1	0.000152462	GAAGAC	0	0	GAAGGC	0	0		TCCCAT	26	0.0736544	TTCCTG	7	0.0169903	CCCGTG	1	0.00222222	TTAAAA	1	0.000376081		GTCGCG	5	0.00114233	TGCAAG	5	0.001374	AATAAT	1	0.000268312	GTGGTC	1
CCCCAC	317	0.0944858	TCGACT	41	0.04371	TGCCAT	2	0.0107527	CTGTCC	4	0.000465062		AGGCAT	1	0.000194553	CCTCTT	1	0.000152462	GCACAT	0	0	GAAGCT	0	0		TCCACA	26	0.0736544	AGGTCC	7	0.0169903	TGAAAC	1	0.00222222	ATACAT	1	0.000376081		CTCGCT	5	0.00114233	ACCCCT	5	0.001374	GGACGG	1	0.000268312	GTGGAT	1
CGGCGA	316	0.0941878	GGACGC	41	0.04371	TTCTGA	2	0.0107527	CTTACC	4	0.000465062		CGCTGC	1	0.000194553	CGCTCA	1	0.000152462	CGTCCA	0	0	GAAGCG	0	0		TCGAAC	26	0.0736544	CTTCTC	7	0.0169903	CTGGGG	1	0.00222222	TATTTC	1	0.000376081		CGGGGC	5	0.00114233	TTTTTC	5	0.001374	CATTCG	1	0.000268312	GTTCCT	1
CTCACA	316	0.0941878	CAGCAC	40	0.0426439	CTACTC	2	0.0107527	ATCAAC	4	0.000465062		CGCTTC	1	0.000194553	CTCCTG	1	0.000152462	TACCTA	0	0	GAAGCC	0	0		AGGCGG	26	0.0736544	TGACCG	6	0.0145631	TATGAA	1	0.00222222	ATTCCT	1	0.000376081		TTCTAG	5	0.00114233	GGCGGC	5	0.001374	CTTAAA	1	0.000268312	GTTAAA	1
TAGTCC	316	0.0941878	TTTAGA	40	0.0426439	GGTTGG	2	0.0107527	ATTTGC	4	0.000465062		CGCTTG	1	0.000194553	CTATCT	1	0.000152462	GAAGCC	0	0	GCTATC	0	0		TACTCG	26	0.0736544	TACGTA	6	0.0145631	AAGTGA	1	0.00222222	TATGCC	1	0.000376081		ATATGG	5	0.00114233	GGGGCG	5	0.001374	CGGCCA	1	0.000268312	GTGTGC	1
TACGAT	316	0.0941878	AGGCAC	40	0.0426439	GTACTC	2	0.0107527	TATTTA	4	0.000465062		CGCCAC	1	0.000194553	CTATTG	1	0.000152462	CGTGTT	0	0	GAACGT	0	0		TCCGCT	26	0.0736544	TGTGAC	6	0.0145631	CTACGG	1	0.00222222	TTATAA	1	0.000376081		CTCGGG	5	0.00114233	CCGGAT	5	0.001374	CTGTTT	1	0.000268312	GGTCAC	1
GATGCC	316	0.0941878	CTACGG	40	0.0426439	ACTAGC	2	0.0107527	CCCCCC	4	0.000465062		CGCGTG	1	0.000194553	CTCAGG	1	0.000152462	GAAGAT	0	0	GAACGG	0	0		TAGTTG	26	0.0736544	TACAAT	6	0.0145631	ACTGGA	1	0.00222222	GGGAAA	1	0.000376081		ATTTCG	5	0.00114233	GAGACT	5	0.001374	GCAAAC	1	0.000268312	CGGGCG	1
CGACGT	315	0.0938897	GTTGGT	40	0.0426439	TGATCG	2	0.0107527	ACATCC	4	0.000465062		GTATCA	1	0.000194553	TATTTA	1	0.000152462	GAAGAG	0	0	GAACGC	0	0		TCCCAC	26	0.0736544	GCGCAT	6	0.0145631	CTACAA	1	0.00222222	TTAGCC	1	0.000376081		GCGCTT	5	0.00114233	AGGCAC	5	0.001374	CCGTGA	1	0.000268312	GGGGAC	1
CTGCCC	315	0.0938897	GTTTTA	40	0.0426439	CGTGGC	2	0.0107527	CCTTAG	4	0.000465062		ACGAGA	1	0.000194553	CCTTAT	1	0.000152462	GAACGC	0	0	GCCCCA	0	0		CTTAAC	26	0.0736544	CTGGTT	6	0.0145631	TCGCGA	1	0.00222222	GTTCCG	1	0.000376081		CCTTCA	5	0.00114233	CTCAAT	5	0.001374	TGCTAA	1	0.000268312	GGGCCC	1
TACGCT	314	0.0935917	TTGTCG	40	0.0426439	GCTGTG	2	0.0107527	CCCTGG	4	0.000465062		CGGCCC	1	0.000194553	CTAGTC	1	0.000152462	CAAACT	0	0	GAACTT	0	0		TTATCT	26	0.0736544	GTTCCA	6	0.0145631	GGCGCA	1	0.00222222	TTTCGT	1	0.000376081		GCGAGG	5	0.00114233	AGGCAA	5	0.001374	TGTATG	1	0.000268312	AGTCTG	1
TAGCAT	314	0.0935917	TTGAAG	39	0.0415778	TGATAT	2	0.0107527	GTCAGA	4	0.000465062		CTCTTT	1	0.000194553	CCTGAT	1	0.000152462	GAACCT	0	0	ACCGTA	0	0		GTGTGA	26	0.0736544	AGGACG	6	0.0145631	CACATG	1	0.00222222	TTCAAA	1	0.000376081		CGCGTC	5	0.00114233	GTGGAG	5	0.001374	CTGTCT	1	0.000268312	ACGTTG	1
GTTTAG	314	0.0935917	TGTCGA	39	0.0415778	TAAACT	2	0.0107527	CTTAGC	4	0.000465062		CGCTTT	1	0.000194553	CGGGCA	1	0.000152462	TGCCCA	0	0	AAACTA	0	0		TGTGAT	26	0.0736544	TCCACA	6	0.0145631	ATTGAG	1	0.00222222	TTATCT	1	0.000376081		AGCCCT	5	0.00114233	CTTCCT	5	0.001374	ATAGAG	1	0.000268312	GGGTGA	1
AGGCGG	314	0.0935917	ACCATT	39	0.0415778	TTTGGC	2	0.0107527	GGGCGC	4	0.000465062		CGGAGC	1	0.000194553	CTCAAG	1	0.000152462	GAACTC	0	0	GACCGA	0	0		TGACCT	26	0.0736544	TGTAAC	6	0.0145631	TGGTGA	1	0.00222222	GAGCCA	1	0.000376081		GCGGGT	5	0.00114233	TATATT	5	0.001374	TGGAAG	1	0.000268312	CCAAAG	1
TTAGCC	314	0.0935917	ATGCCC	38	0.0405117	CCGCGG	2	0.0107527	CCATGT	4	0.000465062		CGGATT	1	0.000194553	TAACGA	1	0.000152462	CGAGCT	0	0	TGGAGG	0	0		TACACC	26	0.0736544	TGACCT	6	0.0145631	CGTCAG	1	0.00222222	TTACAT	1	0.000376081		GTAGTT	5	0.00114233	AAGACT	5	0.001374	TACTCT	1	0.000268312	GGCGGT	1
TAGTTG	314	0.0935917	GTTTCT	38	0.0405117	TGCGCG	2	0.0107527	TTCACG	4	0.000465062		CGCCAT	1	0.000194553	CTACCG	1	0.000152462	GAACGT	0	0	GACTAT	0	0		CTGTTG	26	0.0736544	TCCGCA	6	0.0145631	GCGCTG	1	0.00222222	TTACAC	1	0.000376081		GGGGTC	5	0.00114233	CTTTAA	5	0.001374	CTGCGC	1	0.000268312	CTGACG	1
TGTAAG	314	0.0935917	CTTCAG	38	0.0405117	CAGTGT	2	0.0107527	CGTGGG	4	0.000465062		CGCCCT	1	0.000194553	TGAGGA	1	0.000152462	GTCACA	0	0	GACTAG	0	0		TACGCA	25	0.0708215	GTGAAC	6	0.0145631	TTCAGC	1	0.00222222	TTACTG	1	0.000376081		TCATGT	5	0.00114233	TACCGG	4	0.0010992	CGACGG	1	0.000268312	ATTAGT	1
CATTCA	313	0.0932936	GGGACT	38	0.0405117	AGATTA	2	0.0107527	CATTTG	4	0.000465062		CGCACC	1	0.000194553	CCGTTC	1	0.000152462	AATTGT	0	0	GACTGC	0	0		TTTTGA	25	0.0708215	ATGCTA	6	0.0145631	CTTCTG	1	0.00222222	TTAGCA	1	0.000376081		GTGAGG	5	0.00114233	CCATGT	4	0.0010992	ACGCGC	1	0.000268312	GGGACC	1
CAACTT	313	0.0932936	ATGAAC	38	0.0405117	CCTACA	2	0.0107527	TCCAGA	4	0.000465062		TCGTCG	1	0.000194553	CCGTGG	1	0.000152462	GACGTT	0	0	CCGCGA	0	0		TGGGCT	25	0.0708215	AGGCGC	6	0.0145631	TTATTG	1	0.00222222	TTACGT	1	0.000376081		AGGGCG	5	0.00114233	TACCTA	4	0.0010992	AAGGGC	1	0.000268312	CTAGTA	1
ATACCC	313	0.0932936	CGTACC	38	0.0405117	CTCCTA	2	0.0107527	CCTTAC	4	0.000465062		GTCATA	1	0.000194553	ACAACC	1	0.000152462	GACGTG	0	0	GAGTAA	0	0		CGACAT	25	0.0708215	TAGGTA	6	0.0145631	GTAAAC	1	0.00222222	TTACGA	1	0.000376081		AATGGC	5	0.00114233	TTCTGA	4	0.0010992	GCGACC	1	0.000268312	TGGCTG	1
TTCGCC	313	0.0932936	TATTAC	38	0.0405117	CTCGCG	2	0.0107527	CGTTCC	4	0.000465062		CGCGGG	1	0.000194553	CTCTTG	1	0.000152462	GACTCC	0	0	CTCGTA	0	0		TCGCTG	25	0.0708215	GGGACT	6	0.0145631	GTCAAG	1	0.00222222	TACCTC	1	0.000376081		GGGGGG	5	0.00114233	GTACGA	4	0.0010992	TGGCAT	1	0.000268312	CTCCTG	1
GTCGAC	312	0.0929955	GTGGAC	37	0.0394456	GGTTTA	2	0.0107527	CTACTG	4	0.000465062		TCTTTA	1	0.000194553	GTCTAG	1	0.000152462	GGGGGA	0	0	GACGTC	0	0		TTATAT	25	0.0708215	TTGGGG	6	0.0145631	CTTCTC	1	0.00222222	TGTCCG	1	0.000376081		GGGGGC	5	0.00114233	CCGCGG	4	0.0010992	GGCGAG	1	0.000268312	GTAGTC	1
ATGAAG	312	0.0929955	GTAGAC	37	0.0394456	CAGACC	2	0.0107527	GTACAC	4	0.000465062		CCTTCA	1	0.000194553	GTTAAT	1	0.000152462	GACTAT	0	0	TCATGA	0	0		TCGTAG	25	0.0708215	CTCGCC	6	0.0145631	TTACAC	1	0.00222222	TTTATC	1	0.000376081		GCAGGG	4	0.000913868	TTACCC	4	0.0010992	ACTTGT	1	0.000268312	CCGACA	1
GAGCCG	312	0.0929955	TATACA	37	0.0394456	CTCACG	2	0.0107527	CTAGTG	4	0.000465062		GGTTGG	1	0.000194553	CTGATG	1	0.000152462	GATAAA	0	0	GACGGT	0	0		TGGGAA	25	0.0708215	TTTTAG	6	0.0145631	GGTTGT	1	0.00222222	TTCGAC	1	0.000376081		CCTATA	4	0.000913868	TCAGCC	4	0.0010992	AAGGCT	1	0.000268312	GTAGCA	1
CCACAT	312	0.0929955	CTCCCG	37	0.0394456	TCTTGC	2	0.0107527	CTATGC	4	0.000465062		CGCCGG	1	0.000194553	CTGACG	1	0.000152462	GCGTGA	0	0	GACGGG	0	0		TGCAAT	25	0.0708215	GCACAG	6	0.0145631	TCCCAC	1	0.00222222	TTTTTT	1	0.000376081		GACAGT	4	0.000913868	TGCACG	4	0.0010992	GAATAT	1	0.000268312	CCAGGC	1
TACCAT	312	0.0929955	ATGCTG	37	0.0394456	TTCCGA	2	0.0107527	CCTGTT	4	0.000465062		CGCGAC	1	0.000194553	CTTTTC	1	0.000152462	TCCTCA	0	0	GACTAC	0	0		CTTACT	25	0.0708215	GATACA	6	0.0145631	GTCCCT	1	0.00222222	TTTTTC	1	0.000376081		CCATTG	4	0.000913868	TACCCG	4	0.0010992	TTAGCA	1	0.000268312	GTATCT	1
TGCACG	312	0.0929955	CTGATC	37	0.0394456	TGCCCC	2	0.0107527	CTATTG	4	0.000465062		CCCCCG	1	0.000194553	CCGTGT	1	0.000152462	GACGCT	0	0	TCAGGA	0	0		TGCCAA	25	0.0708215	CTTACG	6	0.0145631	CACAAC	1	0.00222222	TTTTTA	1	0.000376081		TCTCTC	4	0.000913868	CCTGTT	4	0.0010992	TGGGCA	1	0.000268312	TGACTA	1
TATAAC	311	0.0926975	TACAAG	37	0.0394456	AGCTCG	2	0.0107527	AACGGG	4	0.000465062		CCCCTT	1	0.000194553	CTCGCG	1	0.000152462	GACGCG	0	0	GACGTT	0	0		ATACAT	25	0.0708215	TTTTTA	6	0.0145631	GGTCGT	1	0.00222222	TTTTGC	1	0.000376081		GTATCC	4	0.000913868	TCCCTT	4	0.0010992	TTCCGC	1	0.000268312	TCTGCG	1
CACGCA	311	0.0926975	CACACG	37	0.0394456	AAATGC	2	0.0107527	AAACAT	4	0.000465062		CCCGAG	1	0.000194553	CTCGCT	1	0.000152462	GACGTC	0	0	GACGTG	0	0		GGGCAG	25	0.0708215	GTACAG	6	0.0145631	GGTCTC	1	0.00222222	TTCCGA	1	0.000376081		CTTCTC	4	0.000913868	CTAGAG	4	0.0010992	GTGTCG	1	0.000268312	GGTGAA	1
TGCATT	310	0.0923994	GTGAGC	36	0.0383795	AGCACG	2	0.0107527	CTATAT	4	0.000465062		CCATAG	1	0.000194553	AAAACA	1	0.000152462	TGTCTA	0	0	GGTTGA	0	0		GTACCA	25	0.0708215	ACGCGC	6	0.0145631	CATCGG	1	0.00222222	TTCATT	1	0.000376081		TTTCGG	4	0.000913868	GCGAGG	4	0.0010992	TAAAGC	1	0.000268312	GGTCTT	1
TGCTTG	310	0.0923994	CTCGCC	36	0.0383795	TATATA	2	0.0107527	CGCAAG	4	0.000465062		CCCATG	1	0.000194553	CCGCCA	1	0.000152462	TAGTTA	0	0	ATGTGC	0	0		CATACA	25	0.0708215	CTATTA	6	0.0145631	TACAGG	1	0.00222222	TTCAAC	1	0.000376081		TCATGC	4	0.000913868	TTATCC	4	0.0010992	TTAATG	1	0.000268312	GAGACG	1
GTGATT	310	0.0923994	TTCATG	36	0.0383795	ACCTTG	2	0.0107527	CATCAT	4	0.000465062		TCTCTA	1	0.000194553	TGGTTA	1	0.000152462	GACGGG	0	0	GAGAAT	0	0		TATATA	25	0.0708215	CTATCC	6	0.0145631	CTTGGA	1	0.00222222	TGACCG	1	0.000376081		GTGCCC	4	0.000913868	TCGGCA	4	0.0010992	TGGAAC	1	0.000268312	GTAAAA	1
CTTCGC	309	0.0921013	TGACCC	36	0.0383795	GTTGAC	2	0.0107527	CTAAAG	4	0.000465062		CCCGTT	1	0.000194553	CTCGCC	1	0.000152462	GAGAAC	0	0	GAGAAG	0	0		GTTTTC	25	0.0708215	GTACGC	6	0.0145631	CTTTGC	1	0.00222222	TTCTTT	1	0.000376081		TGTCTA	4	0.000913868	CTTCGC	4	0.0010992	TTCCTC	1	0.000268312	GGGCGC	1
CTTCAT	309	0.0921013	TGTATG	36	0.0383795	AAAATA	2	0.0107527	ATCCTG	4	0.000465062		ATAAGG	1	0.000194553	ACCGCA	1	0.000152462	TGGTTT	0	0	GAGAGC	0	0		AGGCGC	25	0.0708215	GGGCAC	6	0.0145631	TGGGAG	1	0.00222222	TTCTGC	1	0.000376081		ATAAGC	4	0.000913868	TGCGTG	4	0.0010992	AGCGGG	1	0.000268312	GGTGCT	1
CTCCCA	309	0.0921013	CTCCAT	36	0.0383795	GCTTGT	2	0.0107527	TCTTTA	4	0.000465062		GGTCTG	1	0.000194553	CTCTAT	1	0.000152462	GACTTT	0	0	TTGCTA	0	0		TGTATC	24	0.0679887	ACCCCA	6	0.0145631	CTTTCT	1	0.00222222	TTCTAT	1	0.000376081		CGGGAA	4	0.000913868	TTAGAC	4	0.0010992	AATAAA	1	0.000268312	ACCCTT	1
TAGATC	309	0.0921013	CTAGGA	35	0.0373134	TGAACT	2	0.0107527	CGAGGC	4	0.000465062		GTATGT	1	0.000194553	CCTCAG	1	0.000152462	ATCCCA	0	0	GAGACT	0	0		GTTCAT	24	0.0679887	GTCCCC	6	0.0145631	CGTCCA	1	0.00222222	TCCCAG	1	0.000376081		TGCTAC	4	0.000913868	TCGTAC	4	0.0010992	AAGGTT	1	0.000268312	GGCGGG	1
CTTCTG	309	0.0921013	TTGTGT	35	0.0373134	AAGCCA	2	0.0107527	CTTACA	4	0.000465062		CCCGGT	1	0.000194553	CTCGGG	1	0.000152462	GAGACC	0	0	GAGACG	0	0		CTTTGA	24	0.0679887	GTCCAA	6	0.0145631	GTGAAG	1	0.00222222	TGGGTT	1	0.000376081		ACATTC	4	0.000913868	TACGAC	4	0.0010992	CGCCCT	1	0.000268312	ACCCGA	1
ATTCCC	308	0.0918033	CAGACC	35	0.0373134	CACCAG	2	0.0107527	CCCAGG	4	0.000465062		CCCGTC	1	0.000194553	GTGAAA	1	0.000152462	AGAGTG	0	0	GCTATA	0	0		TTCTGC	24	0.0679887	ATGAAT	6	0.0145631	TCTCAA	1	0.00222222	TCCGCA	1	0.000376081		CTTTTT	4	0.000913868	ATAGAA	4	0.0010992	TACAAG	1	0.000268312	TACATG	1
TGCGTT	308	0.0918033	AGTGAC	35	0.0373134	TGAGCA	2	0.0107527	CGTGTC	4	0.000465062		CCATGC	1	0.000194553	TCGCAC	1	0.000152462	GAGAAT	0	0	TGTAAT	0	0		ATGAAT	24	0.0679887	GCGCTT	6	0.0145631	GTCTAA	1	0.00222222	TTAAGA	1	0.000376081		GTCATA	4	0.000913868	CGCAAA	4	0.0010992	ATCTGA	1	0.000268312	ACATCC	1
GTCCGC	308	0.0918033	TCGTGT	35	0.0373134	TCTAAG	1	0.00537634	CATGAG	4	0.000465062		CCATGT	1	0.000194553	GCCTAG	1	0.000152462	ATGGTA	0	0	GACTGT	0	0		GATACA	24	0.0679887	ATGCTT	6	0.0145631	ACCTGA	1	0.00222222	CAGACG	1	0.000376081		TCGAAT	4	0.000913868	CCGGAC	4	0.0010992	TTCGAT	1	0.000268312	CGCCGG	1
CCCGCG	308	0.0918033	CATCCA	35	0.0373134	CCCTCG	1	0.00537634	CAATGT	4	0.000465062		CCAGCC	1	0.000194553	GTACTT	1	0.000152462	CATGGA	0	0	GACTGG	0	0		TGATAT	24	0.0679887	GGGCAA	6	0.0145631	ATTTTC	1	0.00222222	CCGGTT	1	0.000376081		ATAGAA	4	0.000913868	TACGTA	4	0.0010992	TGGAGT	1	0.000268312	TTACGC	1
CCCCGC	308	0.0918033	TTGTAC	35	0.0373134	GAATGC	1	0.00537634	CGAGTT	4	0.000465062		CCAGCG	1	0.000194553	GCTCTA	1	0.000152462	GAAAAA	0	0	GAGAAC	0	0		GAGACT	24	0.0679887	TTCATA	6	0.0145631	CAGGCA	1	0.00222222	TGTAAA	1	0.000376081		GGGCCC	4	0.000913868	AGACTG	4	0.0010992	GGCCGG	1	0.000268312	AGGGCA	1
GCTGCA	308	0.0918033	GGACGT	35	0.0373134	GTAATT	1	0.00537634	CGTGTT	4	0.000465062		GTCGAG	1	0.000194553	CTGGCG	1	0.000152462	GACTCT	0	0	TGTCCC	0	0		CAGACT	24	0.0679887	GGCCCC	6	0.0145631	TGACTC	1	0.00222222	TGTGTG	1	0.000376081		TGCATA	4	0.000913868	CTAGTC	4	0.0010992	GCCCTA	1	0.000268312	GCGTAG	1
TCGTGT	307	0.0915052	TATATG	35	0.0373134	AAATCA	1	0.00537634	CAATTC	4	0.000465062		CCCAGC	1	0.000194553	TCGCCC	1	0.000152462	GACTCG	0	0	GACTTT	0	0		CCGCGC	24	0.0679887	CTACAT	6	0.0145631	TGACCG	1	0.00222222	TGGATA	1	0.000376081		ATCTAA	4	0.000913868	CATAGT	4	0.0010992	GGGCGG	1	0.000268312	AGAAGA	1
TAGTAC	307	0.0915052	AAGATT	35	0.0373134	GTTTGC	1	0.00537634	CAGTCG	4	0.000465062		CCCAGG	1	0.000194553	GAAGGA	1	0.000152462	GACTTC	0	0	CTCCAA	0	0		GTTGGT	24	0.0679887	TGCGTG	6	0.0145631	CACGCA	1	0.00222222	CTCGAG	1	0.000376081		ATATCG	4	0.000913868	CTTTCA	4	0.0010992	CTGGCC	1	0.000268312	CTTTCG	1
TGGATC	306	0.0912072	GTACTA	34	0.0362473	TCATGA	1	0.00537634	GGACGG	4	0.000465062		CCCATC	1	0.000194553	TCGTGC	1	0.000152462	TGTACA	0	0	TAAATA	0	0		GAGCGC	24	0.0679887	TGACCA	5	0.0121359	CTATCT	1	0.00222222	TGGGTA	1	0.000376081		ATATAT	4	0.000913868	TCTCTC	4	0.0010992	GCATTA	1	0.000268312	AGCCTC	1
TAGTTA	305	0.0909091	TTGATT	34	0.0362473	AAATAC	1	0.00537634	CTCTGG	4	0.000465062		GCATGA	1	0.000194553	TCTACT	1	0.000152462	GACTGT	0	0	CCTGCA	0	0		GGGCGG	24	0.0679887	TCAAAT	5	0.0121359	CCACCT	1	0.00222222	TGGGCT	1	0.000376081		TACACC	4	0.000913868	GCCTCT	4	0.0010992	CTTTTA	1	0.000268312	TATCAT	1
CACCTT	305	0.0909091	TTAGCG	34	0.0362473	CCCCTG	1	0.00537634	GTCGTC	4	0.000465062		CCATTT	1	0.000194553	TCTATC	1	0.000152462	AACCAA	0	0	GACCAT	0	0		TGTAAC	24	0.0679887	CATGGC	5	0.0121359	AACCAG	1	0.00222222	TGGGAT	1	0.000376081		ATAGTT	4	0.000913868	TGCCCT	4	0.0010992	AGCCCT	1	0.000268312	AACTAT	1
GTGGCT	305	0.0909091	TATTTT	34	0.0362473	GTGAGT	1	0.00537634	ACAGCT	4	0.000465062		ATTGCG	1	0.000194553	TCTATT	1	0.000152462	GACCAC	0	0	GACCAG	0	0		TTGGGA	24	0.0679887	GGTACA	5	0.0121359	TCTCTA	1	0.00222222	TGGGAC	1	0.000376081		AGCGTC	4	0.000913868	TCGTAT	4	0.0010992	TCTTGC	1	0.000268312	AACACT	1
CTCGCC	305	0.0909091	CTTACC	34	0.0362473	CCTTTG	1	0.00537634	CCTGTG	4	0.000465062		CCGTTG	1	0.000194553	TCGTTG	1	0.000152462	GGCCCT	0	0	GACCGC	0	0		TTTTGG	24	0.0679887	CATACA	5	0.0121359	CTGGTT	1	0.00222222	TTAACT	1	0.000376081		ATATAC	4	0.000913868	CCATCT	4	0.0010992	CATCTA	1	0.000268312	ACCAGT	1
CTCACC	305	0.0909091	TCCCCA	34	0.0362473	TCCTGT	1	0.00537634	CACTAC	4	0.000465062		CCTAAC	1	0.000194553	TTATCG	1	0.000152462	GCAGGA	0	0	GACTCC	0	0		CTGCCC	24	0.0679887	CCCACA	5	0.0121359	CTATGC	1	0.00222222	GGTACT	1	0.000376081		GGGAAA	4	0.000913868	GTTTCT	4	0.0010992	TTCCCG	1	0.000268312	ATGTGT	1
CGTGCC	305	0.0909091	GAGCGG	34	0.0362473	CAACCA	1	0.00537634	CTCGTG	4	0.000465062		CTCCTA	1	0.000194553	TCTACC	1	0.000152462	GACATG	0	0	GACCCT	0	0		GAGCGT	24	0.0679887	GAGCAG	5	0.0121359	GTCCTC	1	0.00222222	CTTATC	1	0.000376081		ATTTTT	4	0.000913868	GCGGTT	4	0.0010992	ACCAAC	1	0.000268312	TTGGGG	1
CTAGAG	304	0.090611	TTGTGC	34	0.0362473	GAATTG	1	0.00537634	CTCGTT	4	0.000465062		CCGACG	1	0.000194553	TATCGT	1	0.000152462	GACCCC	0	0	GACCCG	0	0		GTTGAA	23	0.0651558	TCCCAC	5	0.0121359	CTGTAA	1	0.00222222	TTACAA	1	0.000376081		TATTCT	4	0.000913868	CCACAG	4	0.0010992	TTAACG	1	0.000268312	TATCTG	1
AGACCA	304	0.090611	CTGTCT	34	0.0362473	TCGAGG	1	0.00537634	CGGTCG	4	0.000465062		CCGTCT	1	0.000194553	AAAATA	1	0.000152462	CCCCCA	0	0	GACATC	0	0		GAGCGG	23	0.0651558	CTAACT	5	0.0121359	CTGTGA	1	0.00222222	CGGGTC	1	0.000376081		GCGAGC	4	0.000913868	GTTGGC	4	0.0010992	ATGCGC	1	0.000268312	ACGCGA	1
TGGAGT	304	0.090611	CAGCAG	34	0.0362473	GTCGTT	1	0.00537634	CATGCT	4	0.000465062		GAGATA	1	0.000194553	CGAGTA	1	0.000152462	GACCAT	0	0	TACTTC	0	0		CGTGCG	23	0.0651558	TGGGCC	5	0.0121359	TCCCCA	1	0.00222222	TTAATC	1	0.000376081		GCCAGG	4	0.000913868	TAGGAT	4	0.0010992	AAAGTA	1	0.000268312	CTCCCT	1
TATTCC	304	0.090611	GTTCAG	34	0.0362473	GAGTGT	1	0.00537634	CCTAAT	4	0.000465062		CCTCTC	1	0.000194553	TCCGGT	1	0.000152462	GACCAG	0	0	CTCCCA	0	0		CACACG	23	0.0651558	GAGTCA	5	0.0121359	TCTGCC	1	0.00222222	TTAAGT	1	0.000376081		CCTAAA	4	0.000913868	ATTACT	4	0.0010992	ATGCGG	1	0.000268312	TGGGCA	1
TTACGA	304	0.090611	TTGAGC	34	0.0362473	CCCTCT	1	0.00537634	CCTCAG	4	0.000465062		CGTTCA	1	0.000194553	GCGATT	1	0.000152462	GACAGC	0	0	GACAGG	0	0		TAACAA	23	0.0651558	TGTTGT	5	0.0121359	ACGAGC	1	0.00222222	TGTATC	1	0.000376081		CTCATT	4	0.000913868	ATGCTA	4	0.0010992	ACAATC	1	0.000268312	ACTTAC	1
AGCCGC	304	0.090611	CTTGCT	34	0.0362473	CCCGGG	1	0.00537634	ATAAGA	4	0.000465062		GTGATG	1	0.000194553	TCCGAG	1	0.000152462	GATCGT	0	0	GACCAC	0	0		CTTGCA	23	0.0651558	CTTTCT	5	0.0121359	CTTTCG	1	0.00222222	TGTAGT	1	0.000376081		CGTGGG	4	0.000913868	TTCTTC	4	0.0010992	ATTGTG	1	0.000268312	AGACCT	1
CGACGG	304	0.090611	TGGGCC	34	0.0362473	GTCGTC	1	0.00537634	GGGTCT	4	0.000465062		TAAGTA	1	0.000194553	TGGAGT	1	0.000152462	GACACT	0	0	GCGCCA	0	0		GTACAG	23	0.0651558	CAGCAC	5	0.0121359	CTTACC	1	0.00222222	TGTAGA	1	0.000376081		TTTCTG	4	0.000913868	CAGCTA	4	0.0010992	CTCGGT	1	0.000268312	TTTTAG	1
GTGCAC	304	0.090611	TATTGC	33	0.0351812	TGATAC	1	0.00537634	CTGACC	4	0.000465062		CCTCGG	1	0.000194553	TCCGTG	1	0.000152462	TTATAA	0	0	GACATT	0	0		GTTGAC	23	0.0651558	GTAGTA	5	0.0121359	TCTTAC	1	0.00222222	TGTTCT	1	0.000376081		TCGTCT	4	0.000913868	GCCCGC	4	0.0010992	GCATTT	1	0.000268312	GGGCGG	1
GATGAC	304	0.090611	TGACCT	33	0.0351812	GTAATC	1	0.00537634	CGTAGC	4	0.000465062		GTCGGC	1	0.000194553	TCCTTT	1	0.000152462	GACATC	0	0	GACATG	0	0		TTCAGT	23	0.0651558	GTGAGA	5	0.0121359	CTTATT	1	0.00222222	CTGATT	1	0.000376081		TAGTCC	4	0.000913868	GTTTAT	4	0.0010992	GTTAGG	1	0.000268312	AGCCGC	1
CTTTGG	304	0.090611	GACACA	33	0.0351812	ATCAGG	1	0.00537634	CTCACG	4	0.000465062		CCGAGC	1	0.000194553	TAATAC	1	0.000152462	AGAAAA	0	0	CCTGGA	0	0		TTTAGG	23	0.0651558	TTAATG	5	0.0121359	CACAGC	1	0.00222222	TTTTGG	1	0.000376081		ATCTGC	4	0.000913868	TAGTTA	4	0.0010992	CTCGGA	1	0.000268312	ACTCCG	1
TGTAAC	303	0.090313	TGGACC	33	0.0351812	CCCTGG	1	0.00537634	CTCGCT	4	0.000465062		CTTTCA	1	0.000194553	TCGATG	1	0.000152462	GACAGT	0	0	TACGAG	0	0		GATGCA	23	0.0651558	GGAGCG	5	0.0121359	TCCACT	1	0.00222222	TGTCAC	1	0.000376081		CCTGTT	4	0.000913868	GGACTG	4	0.0010992	TTTCCC	1	0.000268312	CCAGCG	1
CTTTGC	303	0.090313	GCGCGC	33	0.0351812	GTCGGT	1	0.00537634	GTAGGG	4	0.000465062		CAGCGG	1	0.000194553	TCCTAT	1	0.000152462	GACAGG	0	0	GACGAT	0	0		ATGGTA	23	0.0651558	TACCGT	5	0.0121359	TCGCTA	1	0.00222222	GCGCAA	1	0.000376081		CTTTCC	4	0.000913868	CGGGAT	4	0.0010992	TTTCGA	1	0.000268312	AGACAT	1
CTTATT	303	0.090313	ATACCA	33	0.0351812	TGAGGG	1	0.00537634	CAAGGG	4	0.000465062		CCCTTT	1	0.000194553	TCCTCC	1	0.000152462	GACGAC	0	0	GACGAG	0	0		GGACGC	23	0.0651558	TCGTCG	5	0.0121359	GGTGTA	1	0.00222222	GGTAGG	1	0.000376081		TCGCTG	4	0.000913868	CGTGGG	4	0.0010992	TTAAAT	1	0.000268312	AAGACG	1
TGCTAG	303	0.090313	CTATTA	33	0.0351812	GAACGC	1	0.00537634	CTATTT	4	0.000465062		CCGAAT	1	0.000194553	CGACAG	1	0.000152462	GGGGTG	0	0	ACTGGA	0	0		TTGACA	23	0.0651558	AGACGG	5	0.0121359	CATACA	1	0.00222222	GCCTGC	1	0.000376081		ACCATT	4	0.000913868	TCTGCT	4	0.0010992	TTTTAT	1	0.000268312	AATTAA	1
GTGCCC	303	0.090313	TTGCTT	33	0.0351812	ACCCTA	1	0.00537634	TTCACC	4	0.000465062		CCGGGG	1	0.000194553	TGACAT	1	0.000152462	GACCTT	0	0	TACTCA	0	0		TGTGAC	23	0.0651558	CCTGTT	5	0.0121359	TCGCCG	1	0.00222222	GGCAGC	1	0.000376081		AGGCAC	4	0.000913868	CTTTGT	4	0.0010992	TTTTGC	1	0.000268312	AGCATC	1
TGGTAT	303	0.090313	GAGCAG	32	0.0341151	GTCTTC	1	0.00537634	TTCAGG	4	0.000465062		CCGGGT	1	0.000194553	TGACGC	1	0.000152462	GACCTG	0	0	AGTTAA	0	0		TACCTA	23	0.0651558	TTACTC	5	0.0121359	CACCCA	1	0.00222222	GCGTCA	1	0.000376081		CTATGC	4	0.000913868	GGACGT	4	0.0010992	TAGTGG	1	0.000268312	AAGAGT	1
ATGTAT	303	0.090313	TACATC	32	0.0341151	TCCCAT	1	0.00537634	CCTCCG	4	0.000465062		CCGGTG	1	0.000194553	TGACTG	1	0.000152462	GACGCC	0	0	GACGCG	0	0		GTTCAC	23	0.0651558	CTCTTC	5	0.0121359	GGGGCG	1	0.00222222	TCTCAG	1	0.000376081		TCCTGT	4	0.000913868	TTTCTG	4	0.0010992	AGCTAC	1	0.000268312	AGTACC	1
TACAAT	303	0.090313	TGATAT	32	0.0341151	GAACCT	1	0.00537634	CAACTC	4	0.000465062		GAGTTG	1	0.000194553	ATGCTA	1	0.000152462	GTTGAG	0	0	GACCTC	0	0		GTTCAA	23	0.0651558	CTCCCA	5	0.0121359	TCGCTG	1	0.00222222	TCGAGG	1	0.000376081		GCGGCG	4	0.000913868	TTAATA	4	0.0010992	GTTCTG	1	0.000268312	TGGGCG	1
TAACAT	302	0.0900149	GTAGTT	32	0.0341151	ATGGGC	1	0.00537634	GGCAGC	4	0.000465062		CCGCCG	1	0.000194553	TTCGTA	1	0.000152462	GACGAT	0	0	AGGTCC	0	0		TACATC	22	0.0623229	TGTATC	5	0.0121359	CCACAA	1	0.00222222	GCACGC	1	0.000376081		TGTATA	4	0.000913868	TCTATC	4	0.0010992	GAACCT	1	0.000268312	GCGCTT	1
GCGACG	302	0.0900149	TGTAAG	32	0.0341151	TCCCCT	1	0.00537634	CTCCTT	4	0.000465062		CCGCTG	1	0.000194553	TGACCC	1	0.000152462	AAAGCA	0	0	GACCGT	0	0		TTGCAA	22	0.0623229	CTGGGC	5	0.0121359	GGGCTT	1	0.00222222	AAGCAC	1	0.000376081		CTGGCT	4	0.000913868	CGGCAC	4	0.0010992	CTCACT	1	0.000268312	TAAACG	1
CAGTGC	302	0.0900149	CAGCGT	32	0.0341151	TTGGGA	1	0.00537634	CTCGCG	4	0.000465062		CTGAAT	1	0.000194553	TGACCT	1	0.000152462	GACCGC	0	0	TGCGGA	0	0		GCGACC	22	0.0623229	TGTGCT	5	0.0121359	TAATTT	1	0.00222222	ACGTGC	1	0.000376081		GTTTAA	4	0.000913868	TGCAAC	4	0.0010992	GAGGTC	1	0.000268312	TTTTCG	1
ATGACT	302	0.0900149	CCCGGT	32	0.0341151	TGATTC	1	0.00537634	TCAGTC	4	0.000465062		TGCCCT	1	0.000194553	CCGGCT	1	0.000152462	ACTATG	0	0	GACGAC	0	0		ATGCCC	22	0.0623229	CTGAAG	5	0.0121359	TGCCCT	1	0.00222222	GCGACT	1	0.000376081		TTGGGA	4	0.000913868	AGTGCC	4	0.0010992	AGCTCT	1	0.000268312	CGATCG	1
TTAGAT	301	0.0897168	GATGCG	32	0.0341151	CCGCGC	1	0.00537634	TCTGCC	4	0.000465062		GCTGTG	1	0.000194553	GAGTGT	1	0.000152462	GACCCT	0	0	CACTCC	0	0		TTATGT	22	0.0623229	ATACTT	5	0.0121359	ATTGGC	1	0.00222222	CTTAAC	1	0.000376081		CGAACC	4	0.000913868	ATAGAC	4	0.0010992	GATAAG	1	0.000268312	CCACCA	1
TCGGCA	301	0.0897168	GAGCGT	32	0.0341151	ATTTGG	1	0.00537634	TCATCG	4	0.000465062		CTCTGT	1	0.000194553	TGCAAT	1	0.000152462	GACCCG	0	0	GACCTT	0	0		ACAAAC	22	0.0623229	TACATT	5	0.0121359	TGCGGC	1	0.00222222	GCGACC	1	0.000376081		TCGTTT	4	0.000913868	TGCCAT	4	0.0010992	GTAATG	1	0.000268312	CGGCGA	1
GCGACC	300	0.0894188	TTCGCT	32	0.0341151	TCCATT	1	0.00537634	TCCGCA	4	0.000465062		CTCTTG	1	0.000194553	TGCAGG	1	0.000152462	GTGTGA	0	0	GACCTG	0	0		TGACCC	22	0.0623229	TAGGAC	5	0.0121359	CAGCAA	1	0.00222222	GTCTTC	1	0.000376081		TAGTGG	4	0.000913868	CTCGGG	4	0.0010992	AAAATA	1	0.000268312	AGGCTA	1
TGCTTC	299	0.0891207	CTGACA	32	0.0341151	TGCAAT	1	0.00537634	TCACGG	4	0.000465062		CACGCA	1	0.000194553	ATTGGA	1	0.000152462	TAACAC	0	0	GCGTCT	0	0		CTACTT	22	0.0623229	TGTATG	5	0.0121359	TGCCGT	1	0.00222222	CTGTCG	1	0.000376081		AGATGC	4	0.000913868	TGCCTC	4	0.0010992	GAGTAT	1	0.000268312	TCAGCG	1
TATCAC	298	0.0888227	TGCAAC	32	0.0341151	CCGGCC	1	0.00537634	TCCTCG	4	0.000465062		CTGCCC	1	0.000194553	TGATAT	1	0.000152462	GACCGT	0	0	GCGTCG	0	0		CTACAA	22	0.0623229	AGACGA	5	0.0121359	TATATG	1	0.00222222	TGGGGT	1	0.000376081		CTCGCA	4	0.000913868	GGTCGC	4	0.0010992	GCATGA	1	0.000268312	AGGATC	1
TTTAGA	298	0.0888227	GGGCCA	32	0.0341151	GTAACC	1	0.00537634	TCCCAC	4	0.000465062		CTGCCT	1	0.000194553	AGACCT	1	0.000152462	GACCGG	0	0	GCGTCC	0	0		CACACA	22	0.0623229	TTGGGA	5	0.0121359	ATTGGT	1	0.00222222	GGACAT	1	0.000376081		TGCACG	4	0.000913868	GGTCTC	4	0.0010992	GGGGCG	1	0.000268312	CGTAAG	1
CTGTGA	298	0.0888227	TCCCCT	32	0.0341151	ACCGTA	1	0.00537634	CTCGAC	4	0.000465062		AAAACG	1	0.000194553	TCTCAC	1	0.000152462	GCGTAC	0	0	CATTAG	0	0		TACCGA	22	0.0623229	TCCCAA	5	0.0121359	GGGGCC	1	0.00222222	ATTGTG	1	0.000376081		GGGACG	4	0.000913868	CCATGC	4	0.0010992	TGCCTA	1	0.000268312	GAGCGG	1
GACACT	297	0.0885246	TATGAC	32	0.0341151	TAAGGA	1	0.00537634	TATTGG	4	0.000465062		CTGATC	1	0.000194553	TCTCGG	1	0.000152462	ATATCG	0	0	GCGTGT	0	0		AGGCAC	22	0.0623229	AGGCGG	5	0.0121359	GGGTCA	1	0.00222222	GGGAAC	1	0.000376081		ATACCA	4	0.000913868	GTGCCG	4	0.0010992	TCAGGG	1	0.000268312	ACTTTC	1
ACGCGC	297	0.0885246	ATCGCA	32	0.0341151	GTAACG	1	0.00537634	AATGCC	4	0.000465062		CTGATT	1	0.000194553	GGGGGC	1	0.000152462	GCGGTT	0	0	ATAGAA	0	0		CGCACA	22	0.0623229	GTACCA	5	0.0121359	GTGATC	1	0.00222222	CGATCA	1	0.000376081		CTATTA	4	0.000913868	TCGAAA	4	0.0010992	TCTGGT	1	0.000268312	AGCAAC	1
TTCAGC	297	0.0885246	AGGCGG	31	0.033049	CAGACT	1	0.00537634	CCCTCA	4	0.000465062		CTCCCC	1	0.000194553	TCTGAT	1	0.000152462	GCGGTG	0	0	GCGTGC	0	0		CCTGAG	22	0.0623229	GGTTTA	5	0.0121359	TCTATT	1	0.00222222	GGCCCT	1	0.000376081		TTTTAG	4	0.000913868	GGCTGT	4	0.0010992	TATCCG	1	0.000268312	AACACC	1
CTGATA	295	0.0879285	TCGAAC	31	0.033049	GATACC	1	0.00537634	ATGCCC	4	0.000465062		CTCGAG	1	0.000194553	TCTCAG	1	0.000152462	GCGTCC	0	0	ATTTGT	0	0		GTGGTC	22	0.0623229	GTCGTA	4	0.00970874	GTGATA	1	0.00222222	ATGCCG	1	0.000376081		CTAGGC	4	0.000913868	ACCTTA	4	0.0010992	ACACGC	1	0.000268312	AGGCTC	1
AGGACA	295	0.0879285	TACGCG	31	0.033049	CAGAAT	1	0.00537634	ATGAAC	4	0.000465062		CCATGA	1	0.000194553	TCTCCC	1	0.000152462	AAGCGC	0	0	CAAAAA	0	0		TATTAC	22	0.0623229	TACTGC	4	0.00970874	CTGCGC	1	0.00222222	GCTCGC	1	0.000376081		AATTCT	4	0.000913868	ATTTTC	4	0.0010992	GCGGAA	1	0.000268312	AACTGA	1
GATGCG	295	0.0879285	TATAAC	31	0.033049	AGGCCC	1	0.00537634	GCCCTA	4	0.000465062		CTCATG	1	0.000194553	TCTCGC	1	0.000152462	GCGTAT	0	0	GCGGTG	0	0		TGTCCG	22	0.0623229	ATGATG	4	0.00970874	GAAGGA	1	0.00222222	ATCACG	1	0.000376081		TATTTT	4	0.000913868	AATACA	4	0.0010992	CTTTCA	1	0.000268312	ACAAGT	1
TGGCGA	295	0.0879285	ATACAG	31	0.033049	GAAGGC	1	0.00537634	ATCGGA	4	0.000465062		CTCATT	1	0.000194553	TAGAAA	1	0.000152462	GCGTAG	0	0	GCGGTC	0	0		TCGAAT	22	0.0623229	CTAGGA	4	0.00970874	GAAGCT	1	0.00222222	GGAGGC	1	0.000376081		TCGGTC	4	0.000913868	ATGTCG	4	0.0010992	GCAAAG	1	0.000268312	AGGTGT	1
CACGCG	295	0.0879285	TGCGCA	31	0.033049	TGTTGG	1	0.00537634	TGTGGC	4	0.000465062		CTCTAT	1	0.000194553	TCTTTC	1	0.000152462	ATCTGA	0	0	GTAAGA	0	0		TATAAG	21	0.0594901	TATGCG	4	0.00970874	CAGCCA	1	0.00222222	GGAGAT	1	0.000376081		GGCGCA	4	0.000913868	GGACTT	4	0.0010992	CTCTAT	1	0.000268312	TTATCA	1
TAGGCC	295	0.0879285	AGACCA	31	0.033049	TCCTCC	1	0.00537634	TCGTTC	4	0.000465062		GAGGTC	1	0.000194553	GTGTTA	1	0.000152462	CGCCCT	0	0	GCGTAT	0	0		AGGCAA	21	0.0594901	ATGTCA	4	0.00970874	CTAGTG	1	0.00222222	GGAGAC	1	0.000376081		CCAGGG	4	0.000913868	CGGCCG	4	0.0010992	TGTCAC	1	0.000268312	ACGTCT	1
TCGTTC	294	0.0876304	TAGCCA	31	0.033049	AACCCA	1	0.00537634	TCTGAC	4	0.000465062		CTCTCG	1	0.000194553	CTTTTA	1	0.000152462	GCGGCT	0	0	GCGTAG	0	0		ATAGCG	21	0.0594901	TGCACG	4	0.00970874	TACTCG	1	0.00222222	GGACTA	1	0.000376081		GATACA	4	0.000913868	GGGGGG	4	0.0010992	TGTCAA	1	0.000268312	AGACTT	1
TGGCTG	294	0.0876304	CGGACG	31	0.033049	ATCGCA	1	0.00537634	TCTAGG	4	0.000465062		CATCGT	1	0.000194553	CCCATC	1	0.000152462	GCGGCG	0	0	GCGTAC	0	0		TGACCA	21	0.0594901	TCGCTG	4	0.00970874	GAAGTC	1	0.00222222	GACCGT	1	0.000376081		ATGCTC	4	0.000913868	TACAAT	4	0.0010992	TTACAG	1	0.000268312	CTTATG	1
GTTACC	294	0.0876304	TAGACC	31	0.033049	CAAAGG	1	0.00537634	TCTACT	4	0.000465062		CTCGGC	1	0.000194553	CGAAGA	1	0.000152462	GCTCTA	0	0	GCTAGC	0	0		TCGTGT	21	0.0594901	ATGTGC	4	0.00970874	TCGTGA	1	0.00222222	GACATC	1	0.000376081		CGGGGG	4	0.000913868	TGCCCC	4	0.0010992	GGCTCG	1	0.000268312	ACCGCA	0
GTGAGG	294	0.0876304	GGGCAT	31	0.033049	CAGCCG	1	0.00537634	TCGCGT	4	0.000465062		CTCTAG	1	0.000194553	TCTTGT	1	0.000152462	CACCAT	0	0	ATCAAT	0	0		ATGTAA	21	0.0594901	GTTTAA	4	0.00970874	TCGTTC	1	0.00222222	CTTTCC	1	0.000376081		CTTTGC	4	0.000913868	GCGGGT	4	0.0010992	ACAACT	1	0.000268312	TACCTA	0
ATGCCC	294	0.0876304	TCCTAC	31	0.033049	TGATCC	1	0.00537634	TCGAAT	4	0.000465062		CTTCGG	1	0.000194553	TATGCG	1	0.000152462	GCGGGT	0	0	GCTACT	0	0		TTACGG	21	0.0594901	ATGCTG	4	0.00970874	TGCCTC	1	0.00222222	GATGCC	1	0.000376081		CATGAC	4	0.000913868	GGTCCG	4	0.0010992	ATCTTT	1	0.000268312	ATTAAA	0
ATTGCA	293	0.0873323	ACCACA	30	0.0319829	ATTTTA	1	0.00537634	TCCTTT	4	0.000465062		CTTCGT	1	0.000194553	TATGTG	1	0.000152462	GCGGGG	0	0	GGCGTA	0	0		TACCTG	21	0.0594901	GTTAAA	4	0.00970874	ACGCAT	1	0.00222222	GAGATA	1	0.000376081		CTCCAA	4	0.000913868	GGGTTT	4	0.0010992	TTTAAA	1	0.000268312	TAAGTC	0
TTCGAC	293	0.0873323	CTTGAG	30	0.0319829	TTAGCC	1	0.00537634	TCGTCG	4	0.000465062		CTTCTG	1	0.000194553	GCAGCA	1	0.000152462	GCTAAC	0	0	AACATA	0	0		CACTCC	21	0.0594901	TGACCC	4	0.00970874	TTAATG	1	0.00222222	TATTAC	1	0.000376081		TCGGGC	4	0.000913868	TTGGGG	4	0.0010992	AGCAAC	1	0.000268312	GTGATA	0
TGTACG	293	0.0873323	ATTCAC	30	0.0319829	AATCAG	1	0.00537634	TCGTAC	4	0.000465062		TGTGTA	1	0.000194553	CCGCCC	1	0.000152462	GTCTAC	0	0	GACTTC	0	0		GTTTTA	21	0.0594901	TCGTAT	4	0.00970874	GGGCGT	1	0.00222222	GAGAAC	1	0.000376081		ATTTGG	4	0.000913868	CGCCGA	4	0.0010992	GGGGGG	1	0.000268312	GTGGGA	0
CACATT	293	0.0873323	CTATTC	30	0.0319829	CAGATT	1	0.00537634	TCGCTC	4	0.000465062		CTTCCC	1	0.000194553	TATGAC	1	0.000152462	GCGTTT	0	0	GCTAGT	0	0		AGACGA	21	0.0594901	TAATTC	4	0.00970874	CTCGCG	1	0.00222222	CTTCCC	1	0.000376081		TATATT	4	0.000913868	GTGGCT	4	0.0010992	TGACAC	1	0.000268312	GTGGGC	0
GTCCCT	293	0.0873323	CTGGGC	30	0.0319829	TTAAGG	1	0.00537634	TACACC	4	0.000465062		CTTCCT	1	0.000194553	ATAGCT	1	0.000152462	GCGTTG	0	0	GCTAGG	0	0		CTCGAG	21	0.0594901	TACATA	4	0.00970874	GTACAA	1	0.00222222	CTTCAA	1	0.000376081		CCTTTG	4	0.000913868	TAGTGG	4	0.0010992	CTTTAT	1	0.000268312	ACCGCC	0
ATGGTA	293	0.0873323	AACACA	30	0.0319829	GAAGCC	1	0.00537634	TAAAGT	4	0.000465062		CTTGTC	1	0.000194553	TATTAG	1	0.000152462	GCTTAC	0	0	CGAAGG	0	0		TTCTGT	21	0.0594901	GTGGTC	4	0.00970874	GGGTCC	1	0.00222222	CTTACC	1	0.000376081		ACTTTC	4	0.000913868	CGATTT	4	0.0010992	ATGTTA	1	0.000268312	ACGCTG	0
ATGAGA	293	0.0873323	TGTTTC	30	0.0319829	CCGCCC	1	0.00537634	GCTGTA	4	0.000465062		CTTTAG	1	0.000194553	TCCCGA	1	0.000152462	ACCCAG	0	0	GCGTTT	0	0		TCTCAA	21	0.0594901	TACAAG	4	0.00970874	TGATCT	1	0.00222222	GGGTTG	1	0.000376081		TATGAA	4	0.000913868	CCACGG	4	0.0010992	TGACCA	1	0.000268312	ACCCTC	0
GAGACA	292	0.0870343	TTGTCT	30	0.0319829	TGATGC	1	0.00537634	TACCCG	4	0.000465062		CTTTGG	1	0.000194553	TCAACT	1	0.000152462	GCTAAT	0	0	GCGTTG	0	0		TGTTTA	21	0.0594901	ATGCTC	4	0.00970874	CTTTTC	1	0.00222222	TTAAAG	1	0.000376081		TCAATT	4	0.000913868	CGAATT	4	0.0010992	CTCTCT	1	0.000268312	TCACTG	0
TCTCAC	292	0.0870343	GCGACC	30	0.0319829	CCGCAG	1	0.00537634	TACATG	4	0.000465062		GAGTGA	1	0.000194553	TCAAGG	1	0.000152462	AGTTGA	0	0	GCGTTC	0	0		GAGCAC	21	0.0594901	GTCCGC	4	0.00970874	ACGGCA	1	0.00222222	GAAAAA	1	0.000376081		TGTTCG	4	0.000913868	CTGTTG	4	0.0010992	TTTCAC	1	0.000268312	ACCCTA	0
CGTTAC	292	0.0870343	TGGGAT	30	0.0319829	CAGCAT	1	0.00537634	TACATC	4	0.000465062		ATTTTA	1	0.000194553	CAATGA	1	0.000152462	GCGTGC	0	0	TCACTA	0	0		CCGCAG	21	0.0594901	TTATAT	4	0.00970874	TTTCTG	1	0.00222222	TTCTAG	1	0.000376081		CGTTAG	4	0.000913868	GTGTCC	4	0.0010992	AGACTG	1	0.000268312	GAGTCG	0
TGCAAG	292	0.0870343	CAACTT	30	0.0319829	GTCTGG	1	0.00537634	GTTCTT	4	0.000465062		CTTGGC	1	0.000194553	TATTGG	1	0.000152462	GACGGC	0	0	GCTAAT	0	0		GTTAAC	21	0.0594901	CTGTGC	4	0.00970874	CAAACA	1	0.00222222	TGTAAC	1	0.000376081		CGTTTA	4	0.000913868	CTCCGT	4	0.0010992	AACCAA	1	0.000268312	ACGGCT	0
TACTGG	292	0.0870343	CTGGAC	29	0.0309168	GAAGAT	1	0.00537634	GTTCTC	4	0.000465062		CTGGTC	1	0.000194553	TCTAGA	1	0.000152462	GCGTCT	0	0	TTGCGA	0	0		GTTTGC	21	0.0594901	CTTAAC	4	0.00970874	CGCTTG	1	0.00222222	TTCTCG	1	0.000376081		CTGTAT	4	0.000913868	TTCGTG	4	0.0010992	CTGCTT	1	0.000268312	TCGGCT	0
TGCCTG	291	0.0867362	AGCACA	29	0.0309168	GTTCGA	1	0.00537634	GGAGGG	4	0.000465062		CTGGTG	1	0.000194553	TAGATT	1	0.000152462	GCGTCG	0	0	GCTAAC	0	0		TTTGGA	21	0.0594901	CTCCGC	4	0.00970874	CTACCC	1	0.00222222	TTATCG	1	0.000376081		AATTTC	4	0.000913868	TTATAA	4	0.0010992	AAATAC	1	0.000268312	ACCGAA	0
CTATCC	291	0.0867362	TTGCCT	29	0.0309168	GGCGTC	1	0.00537634	GTTTCG	4	0.000465062		GGTTCA	1	0.000194553	TAGGGT	1	0.000152462	GCGTTC	0	0	AACGCA	0	0		TGTATG	20	0.0566572	CCGCCA	4	0.00970874	GAGCCG	1	0.00222222	TACAAT	1	0.000376081		ACTATA	4	0.000913868	GTAGAT	4	0.0010992	GGTAGG	1	0.000268312	TCGAGC	0
TAGCTA	291	0.0867362	ATGTCG	29	0.0309168	GAGCCT	1	0.00537634	AATTCG	4	0.000465062		TGCAGG	1	0.000194553	GATGCA	1	0.000152462	TGGGAG	0	0	GCGCCT	0	0		ATGCTG	20	0.0566572	CTTTGA	4	0.00970874	CAACCT	1	0.00222222	GCAACC	1	0.000376081		GTTCCT	4	0.000913868	TGTCGG	4	0.0010992	GCCAAT	1	0.000268312	ACCGAC	0
ACGCAC	291	0.0867362	TCGTTT	29	0.0309168	GACTGC	1	0.00537634	AACCTT	4	0.000465062		AACACT	1	0.000194553	TAGTTT	1	0.000152462	GCGTGT	0	0	GGACCA	0	0		CTATTA	20	0.0566572	GAGCAC	4	0.00970874	CCCAAC	1	0.00222222	GGGTCA	1	0.000376081		GCTTGC	4	0.000913868	GCGGCC	4	0.0010992	AGATCC	0	0	CTAGTC	0
TGTAGC	290	0.0864382	CTGTGT	29	0.0309168	GACTGG	1	0.00537634	AGCACA	4	0.000465062		CTTACT	1	0.000194553	TAGCAT	1	0.000152462	GCGTGG	0	0	GCGCCC	0	0		GGGACC	20	0.0566572	CTTGAC	4	0.00970874	TACCCT	1	0.00222222	GTCGTT	1	0.000376081		CTGTTT	4	0.000913868	GGTGCG	4	0.0010992	GCAGGT	0	0	GACCCG	0
TGCGGG	290	0.0864382	TACGAT	29	0.0309168	GGGTGT	1	0.00537634	GAGTAG	4	0.000465062		GAATGA	1	0.000194553	AGGCAC	1	0.000152462	GCGCAC	0	0	CGGGCG	0	0		GTACTC	20	0.0566572	TTACCG	4	0.00970874	GGGTGT	1	0.00222222	GAGCAA	1	0.000376081		TTCGTA	4	0.000913868	ATTAAC	4	0.0010992	GCAGAT	0	0	ACCCCT	0
CGGCGT	290	0.0864382	CTCCCC	29	0.0309168	GAGCGC	1	0.00537634	TTAACA	4	0.000465062		CTTAGT	1	0.000194553	TAGGCT	1	0.000152462	GCTGTG	0	0	GCGCGT	0	0		GACCTG	20	0.0566572	ATCAAT	4	0.00970874	CAACAC	1	0.00222222	GAGATT	1	0.000376081		TTCGCC	4	0.000913868	GCGGGC	4	0.0010992	GGAGAG	0	0	ACCGAT	0
ATTGGC	290	0.0864382	GGACGA	29	0.0309168	ACGACT	1	0.00537634	TATCGG	4	0.000465062		CCATTG	1	0.000194553	TATACT	1	0.000152462	GCGATT	0	0	TGATAA	0	0		AGCAGT	20	0.0566572	TGTCTT	4	0.00970874	ATTTCT	1	0.00222222	GTTATG	1	0.000376081		GCACAA	4	0.000913868	ATGATC	4	0.0010992	GGGTCC	0	0	GTGGCC	0
GCACGC	290	0.0864382	GACATC	28	0.0298507	TCTCGC	1	0.00537634	AGATGG	4	0.000465062		CTGTCC	1	0.000194553	TATCAG	1	0.000152462	CAGTTA	0	0	GCGCGC	0	0		GTTTCT	20	0.0566572	CGCCAC	4	0.00970874	TGCAGC	1	0.00222222	GAGTTC	1	0.000376081		CAGGTC	4	0.000913868	AAATCA	4	0.0010992	GGTTAA	0	0	CAAGTT	0
ATGGTT	290	0.0864382	TCGGCA	28	0.0298507	CCAACC	1	0.00537634	TATATG	4	0.000465062		CTGTTG	1	0.000194553	TATCAT	1	0.000152462	GCGCCC	0	0	TATATA	0	0		CTTCAG	20	0.0566572	GTCCCT	4	0.00970874	TGCACA	1	0.00222222	GAGTGA	1	0.000376081		TTAAGA	4	0.000913868	AGCGAT	3	0.000824402	GATAGG	0	0	GTGCTT	0
GCGCAG	289	0.0861401	ATGTTA	28	0.0298507	CATCGG	1	0.00537634	CAGCAT	4	0.000465062		CGTATC	1	0.000194553	ATCGAG	1	0.000152462	AGCCGC	0	0	GCGATG	0	0		TGTTAG	20	0.0566572	CTAGTG	4	0.00970874	TGCCAA	1	0.00222222	TTCTGG	1	0.000376081		TTTAGT	4	0.000913868	TTAGCT	3	0.000824402	TCGATG	0	0	CGTCGT	0
GAGCCC	289	0.0861401	TATGAT	28	0.0298507	CTCCAT	1	0.00537634	GCAACG	4	0.000465062		AGCCGA	1	0.000194553	CAACCA	1	0.000152462	AAAGAA	0	0	GCGATC	0	0		TACTAT	20	0.0566572	CTATTC	4	0.00970874	GTGAGA	1	0.00222222	GAGCGC	1	0.000376081		GCGCGC	4	0.000913868	TGCACC	3	0.000824402	GGTGGC	0	0	CGTGCG	0
TCGTAG	289	0.0861401	AGCACG	28	0.0298507	TCTCCG	1	0.00537634	TACCTG	4	0.000465062		CGATTA	1	0.000194553	TATATC	1	0.000152462	GCGCAG	0	0	TTTCCT	0	0		TATATG	20	0.0566572	TTTGGC	4	0.00970874	CTACCG	1	0.00222222	GTTATC	1	0.000376081		TTATAT	4	0.000913868	CGCATT	3	0.000824402	GCAACT	0	0	GTGGAA	0
ATTCCT	289	0.0861401	CGATGC	27	0.0287846	ATATTA	1	0.00537634	AACCAT	4	0.000465062		CGGGGC	1	0.000194553	TATCTC	1	0.000152462	CCCTGA	0	0	TAGAGC	0	0		TGGGAT	20	0.0566572	TTTCTG	4	0.00970874	ATTTCA	1	0.00222222	GTGTGA	1	0.000376081		CTGCCG	4	0.000913868	CTAGGC	3	0.000824402	GCAAGC	0	0	TTCCGA	0
TGGGTA	288	0.085842	TGGACT	27	0.0287846	TCTAGT	1	0.00537634	TAGCTC	4	0.000465062		CGTAGT	1	0.000194553	CGGGAG	1	0.000152462	TACGAA	0	0	GCGCAT	0	0		TGTCGA	20	0.0566572	CCATAC	4	0.00970874	TCAGAA	1	0.00222222	GTAACG	1	0.000376081		TCACTT	4	0.000913868	TTTGGA	3	0.000824402	TAAGTG	0	0	GTTAGT	0
ATACGA	287	0.085544	TCGTCC	27	0.0287846	GACTAT	1	0.00537634	TACTTT	4	0.000465062		AGACGT	1	0.000194553	TCATGC	1	0.000152462	GCGACG	0	0	GCGCAG	0	0		GCTGCA	20	0.0566572	CAGTCA	4	0.00970874	TACTCT	1	0.00222222	ACGTTC	1	0.000376081		AGTCCG	4	0.000913868	CAACAC	3	0.000824402	AAACAG	0	0	GCCTTA	0
CACCTG	287	0.085544	GTTGCG	27	0.0287846	GTATTT	1	0.00537634	AAGGTG	4	0.000465062		CGTCTC	1	0.000194553	TCATGT	1	0.000152462	GCGACC	0	0	TAGGTA	0	0		GGACGG	20	0.0566572	TGGGCT	4	0.00970874	TGCAAA	1	0.00222222	TAACAG	1	0.000376081		TTTAGG	4	0.000913868	GTCATG	3	0.000824402	GAGCCA	0	0	GTTAGC	0
TAGGAC	287	0.085544	TCACTG	27	0.0287846	CCACGG	1	0.00537634	AAGCCC	4	0.000465062		TGAGGG	1	0.000194553	TTTGCC	1	0.000152462	GCGATC	0	0	CGGGAT	0	0		TTCGCG	20	0.0566572	GCGCAG	4	0.00970874	GAGAAC	1	0.00222222	GAATGG	1	0.000376081		CCTGAT	4	0.000913868	CTACTA	3	0.000824402	GGTAAA	0	0	TGAACT	0
GCGCAT	287	0.085544	CCCATT	27	0.0287846	CCACGC	1	0.00537634	AATGCA	4	0.000465062		CGTGAG	1	0.000194553	TCATCG	1	0.000152462	TAAAGA	0	0	GCGGCT	0	0		CTACCT	19	0.0538244	TGCTAA	4	0.00970874	TGCACT	1	0.00222222	GTTCGC	1	0.000376081		TCACGT	4	0.000913868	GGCCGG	3	0.000824402	CTCTAG	0	0	GTTATC	0
GTCTCA	286	0.0852459	TACGTA	27	0.0287846	GGGATA	1	0.00537634	TTAGCT	4	0.000465062		CGTCAC	1	0.000194553	TCATCT	1	0.000152462	GCGAGG	0	0	GCGGCG	0	0		GGTGCC	19	0.0538244	ATGTCT	4	0.00970874	TGCACC	1	0.00222222	GTTCCC	1	0.000376081		GAAATG	4	0.000913868	CTACTC	3	0.000824402	GCAAGA	0	0	GTTATA	0
TCACGC	286	0.0852459	TGGGAC	27	0.0287846	GATGAG	1	0.00537634	TTCCGT	4	0.000465062		CGTCCC	1	0.000194553	CACATT	1	0.000152462	GCGAGC	0	0	GCGGCC	0	0		CAGCGG	19	0.0538244	GTAGGC	4	0.00970874	GGCGGG	1	0.00222222	GCTGCT	1	0.000376081		GGGGTG	4	0.000913868	CTGTTA	3	0.000824402	GCAGTC	0	0	ACCAGA	0
CCCATT	286	0.0852459	GACCTG	26	0.0277186	TAGTTC	1	0.00537634	TTCCCC	4	0.000465062		CGTCGT	1	0.000194553	TCATTT	1	0.000152462	GCGGAC	0	0	AAGTAG	0	0		TGCCAT	19	0.0538244	CAGCAA	4	0.00970874	AGGCGC	1	0.00222222	GTAGCC	1	0.000376081		CGAGCT	4	0.000913868	CGCGGT	3	0.000824402	CCACGA	0	0	ACCAGC	0
GTTGCC	286	0.0852459	GAGCAT	26	0.0277186	GTATTC	1	0.00537634	GTTCCG	4	0.000465062		CGGGGG	1	0.000194553	CTTCGA	1	0.000152462	GCCATA	0	0	GCGGGT	0	0		CCTGTT	19	0.0538244	GTACCG	4	0.00970874	TTCTTA	1	0.00222222	GGGTGT	1	0.000376081		GTGAAT	4	0.000913868	ACTGGT	3	0.000824402	GGTTAC	0	0	GTTAAT	0
CTACTC	286	0.0852459	TATGCT	26	0.0277186	TCTATG	1	0.00537634	TTAACC	4	0.000465062		CCCTAG	1	0.000194553	TCCCAC	1	0.000152462	CCTACA	0	0	GCGGGG	0	0		GTTCCG	19	0.0538244	TTCTAC	4	0.00970874	TTCTAT	1	0.00222222	TGTGGC	1	0.000376081		CCTGGC	4	0.000913868	CTTTTT	3	0.000824402	GGTGTT	0	0	GTTAGA	0
AGACGG	286	0.0852459	CTGCCC	26	0.0277186	GACTCC	1	0.00537634	TGTTCG	4	0.000465062		CTGCCA	1	0.000194553	TCAAAT	1	0.000152462	GCGCTG	0	0	ACAGAA	0	0		GTTGCG	19	0.0538244	CCACAC	4	0.00970874	AGCTTT	1	0.00222222	GGGAGC	1	0.000376081		TTACCA	4	0.000913868	ATGTGC	3	0.000824402	GCAGGC	0	0	GTTACT	0
CACATG	285	0.0849478	TTTTGG	26	0.0277186	CCACAC	1	0.00537634	TGTGGG	4	0.000465062		CGGCTT	1	0.000194553	ACACCT	1	0.000152462	GCGGCC	0	0	CGACGC	0	0		GTTAAA	19	0.0538244	CTACCT	4	0.00970874	AGGATT	1	0.00222222	TTTTAG	1	0.000376081		GTGCTC	4	0.000913868	CTCATA	3	0.000824402	GGTGTC	0	0	AGCTTT	0
ATCACT	285	0.0849478	CTTGTG	26	0.0277186	GTATAT	1	0.00537634	TTAGCG	4	0.000465062		CTCCCA	1	0.000194553	TCCACG	1	0.000152462	CGAACG	0	0	GCGCTT	0	0		TTACCC	19	0.0538244	GATCCG	4	0.00970874	TATATT	1	0.00222222	ATCATA	1	0.000376081		CTGTAG	4	0.000913868	CCCTTT	3	0.000824402	TGCGAG	0	0	GTTCCC	0
CTTCGT	285	0.0849478	ACGCGC	26	0.0277186	CATTAG	1	0.00537634	TTAATC	4	0.000465062		TAGTGA	1	0.000194553	TCCAGC	1	0.000152462	GCAATA	0	0	GCGCTG	0	0		TACTTT	19	0.0538244	ATAGCA	4	0.00970874	GAGGAT	1	0.00222222	TAAGGC	1	0.000376081		GTTATC	4	0.000913868	CGATCT	3	0.000824402	GGTCAA	0	0	GTTCCA	0
CAGCTC	285	0.0849478	GCGCAG	26	0.0277186	GTTAGA	1	0.00537634	CTCCCA	4	0.000465062		CGGTTT	1	0.000194553	TCAAGT	1	0.000152462	GCGGAG	0	0	GCGCTC	0	0		ATGTAT	19	0.0538244	GCGCAA	4	0.00970874	TTCTAC	1	0.00222222	TAAGCC	1	0.000376081		TGCGCG	4	0.000913868	CTAGGA	3	0.000824402	TAAATG	0	0	TACTGA	0
GTCCAC	285	0.0849478	GTTCTC	26	0.0277186	GAGACC	1	0.00537634	AAAACC	4	0.000465062		TGAAGG	1	0.000194553	ACAGTA	1	0.000152462	ATATGA	0	0	TGTAGT	0	0		TAAGAG	19	0.0538244	ATGTTT	4	0.00970874	TTCTAA	1	0.00222222	TATCGG	1	0.000376081		TCATTT	4	0.000913868	GGACCG	3	0.000824402	AACTCG	0	0	ACCACC	0
CTCCTA	284	0.0846498	GGCGCA	26	0.0277186	TCTGCG	1	0.00537634	AAGTCA	4	0.000465062		GATGTA	1	0.000194553	GTTTTT	1	0.000152462	TGATCG	0	0	GCGGAT	0	0		TACATA	19	0.0538244	CTTTGC	4	0.00970874	TTAACG	1	0.00222222	TACATT	1	0.000376081		CGAGGG	4	0.000913868	CAGGAT	3	0.000824402	GCAACC	0	0	ATGAGA	0
GTGAGA	284	0.0846498	GCACAG	26	0.0277186	GTAGTC	1	0.00537634	TGAGTA	4	0.000465062		GTCCGT	1	0.000194553	TCACTC	1	0.000152462	GCGCCT	0	0	AGTGTA	0	0		CTTAAA	19	0.0538244	TCGGAG	4	0.00970874	GCTGAC	1	0.00222222	TACATC	1	0.000376081		TATCCC	4	0.000913868	GTTCGC	3	0.000824402	GCAGGA	0	0	GTTCAA	0
GGCCAC	284	0.0846498	CTGCCG	26	0.0277186	TCTTAT	1	0.00537634	CATACA	4	0.000465062		CGGTGG	1	0.000194553	TCAATT	1	0.000152462	GCGCCG	0	0	GCGGAC	0	0		CGCGCC	19	0.0538244	TCTCAC	4	0.00970874	GCTGCA	1	0.00222222	CAGTCC	1	0.000376081		CTGCTA	4	0.000913868	ATTTTA	3	0.000824402	GCAACA	0	0	ACTTGG	0
GTTAAT	284	0.0846498	CAACAC	25	0.0266525	GTAGTG	1	0.00537634	ACCTTC	4	0.000465062		AATAGT	1	0.000194553	TCACAG	1	0.000152462	AATAAA	0	0	GCTTGC	0	0		TGTGCT	19	0.0538244	GAGCAT	4	0.00970874	TTCTCC	1	0.00222222	TACAAA	1	0.000376081		TAAATT	4	0.000913868	ACTCTG	3	0.000824402	GGTATT	0	0	ACCACT	0
TTCTGG	284	0.0846498	TTACTG	25	0.0266525	TCTTAC	1	0.00537634	GTTATA	4	0.000465062		TCGCAA	1	0.000194553	TCACCG	1	0.000152462	TAGCCG	0	0	CACAGG	0	0		AGACTC	19	0.0538244	TCGAAG	4	0.00970874	GCTGCT	1	0.00222222	GTTTCT	1	0.000376081		TAAATG	4	0.000913868	TCTTAT	3	0.000824402	CCGCCG	0	0	GTTCAT	0
CTGATC	284	0.0846498	ATACTT	25	0.0266525	GAGAGC	1	0.00537634	GGTTTG	4	0.000465062		CTAGTC	1	0.000194553	TCACTT	1	0.000152462	GCGCGT	0	0	GCTTCT	0	0		GTACCG	19	0.0538244	ATTCGG	3	0.00728155	CGCCCG	1	0.00222222	GTTTCA	1	0.000376081		TGTTGC	4	0.000913868	ATCGCT	3	0.000824402	GGGTGT	0	0	GCCTAT	0
ATGGTC	283	0.0843517	TTCTGT	25	0.0266525	TCTGTG	1	0.00537634	TTCTTC	4	0.000465062		CGTGGC	1	0.000194553	TCAGGG	1	0.000152462	GCGCGG	0	0	GCTTCG	0	0		AGCTAT	19	0.0538244	GGGACC	3	0.00728155	GCAACC	1	0.00222222	GTTTAA	1	0.000376081		TTACCC	4	0.000913868	AGTATC	3	0.000824402	GCAGCC	0	0	GTTCAC	0
CTGCCG	283	0.0843517	CTTTTG	25	0.0266525	TCTGTT	1	0.00537634	TTCTCC	4	0.000465062		TCTCCA	1	0.000194553	TCAGGT	1	0.000152462	CGTATC	0	0	GCTTTC	0	0		AGGACT	19	0.0538244	TGCGCG	3	0.00728155	GAGAGG	1	0.00222222	TAACAT	1	0.000376081		AATTCA	4	0.000913868	ATTACG	3	0.000824402	TCCGTG	0	0	ACGCGG	0
GGTGTC	283	0.0843517	TCGTAG	25	0.0266525	CATTTC	1	0.00537634	CTGTAT	4	0.000465062		TAATTA	1	0.000194553	TCAGTC	1	0.000152462	GCTGTT	0	0	TTGGGG	0	0		CCCACA	19	0.0538244	TCGTAC	3	0.00728155	GCGCCA	1	0.00222222	ATCCCG	1	0.000376081		CTTAGC	4	0.000913868	GCGTTG	3	0.000824402	GTACTG	0	0	GTTGGG	0
GTTATA	283	0.0843517	CTACTT	25	0.0266525	GAGCAC	1	0.00537634	TAAGTG	4	0.000465062		CTATGG	1	0.000194553	AGCCAC	1	0.000152462	GCGCAA	0	0	GCTTGT	0	0		GCGCGG	19	0.0538244	TTAGAC	3	0.00728155	CTCGAG	1	0.00222222	TATTAA	1	0.000376081		CTTACC	4	0.000913868	TGCGCG	3	0.000824402	CGCCTT	0	0	GAAGGT	0
CTCCCG	283	0.0843517	TAGGTA	24	0.0255864	TCTCTT	1	0.00537634	AATACC	4	0.000465062		CTATTT	1	0.000194553	TCAGAG	1	0.000152462	GCTTCC	0	0	GCTTGG	0	0		GGACGA	19	0.0538244	GGGCAT	3	0.00728155	GGTTTG	1	0.00222222	GTTTTC	1	0.000376081		GGGTCG	4	0.000913868	CTGGGC	3	0.000824402	GGTGTA	0	0	GCCACC	0
TAACCA	283	0.0843517	AGACTC	24	0.0255864	GAGCCC	1	0.00537634	TGCATC	4	0.000465062		CTCAAC	1	0.000194553	CGTCAG	1	0.000152462	ATTTAT	0	0	GCTTAC	0	0		CTCGAA	19	0.0538244	GTAATG	3	0.00728155	ATGTAT	1	0.00222222	GGGTGC	1	0.000376081		TTCGAA	4	0.000913868	GCGTGC	3	0.000824402	GCACCT	0	0	GTGTCC	0
TCACCT	282	0.0840537	TTCTGC	24	0.0255864	GATTCC	1	0.00537634	ATCAGT	4	0.000465062		CATGTA	1	0.000194553	TTCAGC	1	0.000152462	GCTTAT	0	0	GAACCG	0	0		GGTGCG	18	0.0509915	TGATCT	3	0.00728155	GAGCGT	1	0.00222222	GGGTAT	1	0.000376081		GTGTTA	4	0.000913868	GGCGGT	3	0.000824402	CAGCCT	0	0	GAGGCG	0
GTTTTG	282	0.0840537	GGGCGG	24	0.0255864	CATTTT	1	0.00537634	TGAGAG	4	0.000465062		GTCGTA	1	0.000194553	ACTTGA	1	0.000152462	GCTTAG	0	0	GCTGTT	0	0		GGACGT	18	0.0509915	GGGCGA	3	0.00728155	GCTCAT	1	0.00222222	GGGCCA	1	0.000376081		TAAACT	4	0.000913868	GATCCT	3	0.000824402	GCATAG	0	0	ACCCCA	0
TGTAGG	282	0.0840537	TTGCGC	24	0.0255864	TCTGAT	1	0.00537634	TGGAGG	4	0.000465062		CTATCC	1	0.000194553	TTCCTT	1	0.000152462	GCTGGC	0	0	GCTGTG	0	0		GTGAGA	18	0.0509915	TGCCTT	3	0.00728155	GAGCAG	1	0.00222222	GTACCC	1	0.000376081		GCATGA	4	0.000913868	GGTGTC	3	0.000824402	GGTAGC	0	0	GTGGTA	0
CTAGGA	282	0.0840537	TGCCCT	24	0.0255864	CAGGGC	1	0.00537634	TGGAAC	4	0.000465062		CGTGTG	1	0.000194553	ATCGTG	1	0.000152462	ATTGCC	0	0	GCTTCC	0	0		GTAGAG	18	0.0509915	CAGTCC	3	0.00728155	GCTCAG	1	0.00222222	GGTATT	1	0.000376081		TGGGGT	4	0.000913868	CAGTAG	3	0.000824402	GCACGT	0	0	ACCCCC	0
TGGCCC	282	0.0840537	CTTCGC	24	0.0255864	TCTTCG	1	0.00537634	CGGGTA	4	0.000465062		TACTCA	1	0.000194553	TTCAGG	1	0.000152462	GTCAAA	0	0	GTAGAC	0	0		GTACGC	18	0.0509915	TTAGCT	3	0.00728155	CGAACA	1	0.00222222	AGAGCG	1	0.000376081		GCTGTT	4	0.000913868	CTCTAA	3	0.000824402	GGTCGC	0	0	ATAATG	0
CCACGC	281	0.0837556	CTGCCT	24	0.0255864	GAGAAC	1	0.00537634	TGAATC	4	0.000465062		GCTCGA	1	0.000194553	TTCCAG	1	0.000152462	GCTGCG	0	0	GCTTAT	0	0		GTAGTA	18	0.0509915	GGACGC	3	0.00728155	GGTACG	1	0.00222222	GGTACA	1	0.000376081		CGCTAG	4	0.000913868	GGGGCC	3	0.000824402	GGCGCA	0	0	ACCCAT	0
TACCTG	281	0.0837556	TTGCTG	24	0.0255864	GCACTT	1	0.00537634	TCTTCG	4	0.000465062		CGTGCT	1	0.000194553	TTCCGC	1	0.000152462	GCTGTC	0	0	GCTTAG	0	0		CTCACA	18	0.0509915	ATTTAT	3	0.00728155	AGGACC	1	0.00222222	GGGATT	1	0.000376081		ATAGCG	4	0.000913868	GTCGGT	3	0.000824402	GGTATA	0	0	CTAATC	0
TACTAC	281	0.0837556	CTTTGT	24	0.0255864	GCCCTC	1	0.00537634	TCTGCT	4	0.000465062		GACGTT	1	0.000194553	ATCCCA	1	0.000152462	CAATAC	0	0	GGAAGC	0	0		GCGCCA	18	0.0509915	CGACGT	3	0.00728155	ACCGCG	1	0.00222222	GGGATC	1	0.000376081		CTACCT	4	0.000913868	GGGAGT	3	0.000824402	GCACTA	0	0	CTATTG	0
CTCCCT	281	0.0837556	CTCGCT	24	0.0255864	AGGTTA	1	0.00537634	CTATCC	4	0.000465062		CTAAAC	1	0.000194553	TTCTAG	1	0.000152462	GCTGGT	0	0	CCCGCC	0	0		CTTCGC	18	0.0509915	CGGTCG	3	0.00728155	TATCGG	1	0.00222222	GGGAGA	1	0.000376081		ATGGAA	4	0.000913868	ATCTAT	3	0.000824402	CCCCTG	0	0	GTGTTA	0
CTGTTA	281	0.0837556	CATGCA	24	0.0255864	TCGGCG	1	0.00537634	TGACGC	4	0.000465062		CTAAGC	1	0.000194553	ACACCC	1	0.000152462	GCTGGG	0	0	GGAACT	0	0		CTTTGT	18	0.0509915	TTTTGA	3	0.00728155	TTCAGT	1	0.00222222	AAGCAT	1	0.000376081		AGTCTT	4	0.000913868	GGTCGA	3	0.000824402	GGTATC	0	0	GCACTT	0
CATACA	281	0.0837556	AAGCGC	24	0.0255864	CAGTAT	1	0.00537634	CACAGC	4	0.000465062		CTAAGG	1	0.000194553	TTCTTG	1	0.000152462	ATAACA	0	0	GGAACG	0	0		GTAGGC	18	0.0509915	GTACCT	3	0.00728155	CCCTGG	1	0.00222222	GGGGTC	1	0.000376081		TACGCG	4	0.000913868	CTGGTT	3	0.000824402	CACAAT	0	0	ACCATA	0
CACACA	281	0.0837556	CTACGC	24	0.0255864	ACGCAG	1	0.00537634	GTCCCG	4	0.000465062		GCCACC	1	0.000194553	TTCGGG	1	0.000152462	GTGCCC	0	0	GGAATC	0	0		TTCATG	18	0.0509915	ACCACG	3	0.00728155	GGGGAG	1	0.00222222	TCGTTA	1	0.000376081		TCCCAG	4	0.000913868	GTCTTC	3	0.000824402	GGTCTA	0	0	ACCATC	0
CTCGAG	280	0.0834575	CACATG	24	0.0255864	AGGTCC	1	0.00537634	CTTATA	4	0.000465062		CGTTGG	1	0.000194553	GCCTCT	1	0.000152462	TTCCTA	0	0	AGATCG	0	0		TGCACT	18	0.0509915	GGACGG	3	0.00728155	TCTACG	1	0.00222222	TGATAG	1	0.000376081		ACCACA	4	0.000913868	TTCGTT	3	0.000824402	CGGGAC	0	0	GTGTGA	0
CTATTC	280	0.0834575	TCGAAG	23	0.0245203	GTCCCT	1	0.00537634	TCGGCG	4	0.000465062		CGTTTT	1	0.000194553	TTCGTT	1	0.000152462	AGAAGA	0	0	GGAAGT	0	0		TAACAC	18	0.0509915	AGGACT	3	0.00728155	GATGTC	1	0.00222222	GTACCA	1	0.000376081		CTTAAG	4	0.000913868	TGCAGT	3	0.000824402	GGTCGT	0	0	ACCCAA	0
ATACCG	279	0.0831595	GTCCCT	23	0.0245203	TGCTCA	1	0.00537634	TGTGAT	4	0.000465062		TCATTG	1	0.000194553	TACCCA	1	0.000152462	GGAACC	0	0	GGAAGG	0	0		TTCGCT	18	0.0509915	GGATCC	3	0.00728155	AGTACC	1	0.00222222	GTACAA	1	0.000376081		CTTAAT	4	0.000913868	GGTCAC	3	0.000824402	TGTGAG	0	0	TGGGTA	0
GTGATA	279	0.0831595	GTCTAC	23	0.0245203	GAGGGG	1	0.00537634	TGTGAG	4	0.000465062		TCCACC	1	0.000194553	TAAAAA	1	0.000152462	ACAACG	0	0	GGAAAC	0	0		ATAGAT	18	0.0509915	GTTTCT	3	0.00728155	CCTCAA	1	0.00222222	GGTGAA	1	0.000376081		ACATTT	4	0.000913868	GCGTCC	3	0.000824402	GAAGTG	0	0	AGCATT	0
ATTACA	279	0.0831595	ATCGAC	23	0.0245203	ACAATA	1	0.00537634	GGGTCA	4	0.000465062		GGTGTA	1	0.000194553	ACGTCA	1	0.000152462	GGAAAT	0	0	CCGTAT	0	0		TGTAAG	18	0.0509915	TCGTGT	3	0.00728155	AGTCGT	1	0.00222222	CGAGGC	1	0.000376081		GTCGAG	4	0.000913868	GGCTCA	3	0.000824402	GGTCCC	0	0	TTTCTG	0
TTAATC	279	0.0831595	GGGCGT	23	0.0245203	AAGTAT	1	0.00537634	TGGGCG	4	0.000465062		TCAGAT	1	0.000194553	GAAAGG	1	0.000152462	GGAAAG	0	0	GCTTTT	0	0		GTTTGT	18	0.0509915	TAACAA	3	0.00728155	AGCTGA	1	0.00222222	GTACTA	1	0.000376081		GTAGCA	4	0.000913868	GCTATA	3	0.000824402	GGTAGA	0	0	ACCATT	0
CTCCTG	279	0.0831595	ATGAGA	23	0.0245203	CAACTT	1	0.00537634	ATGCTC	4	0.000465062		TCAGCG	1	0.000194553	TTACCG	1	0.000152462	GCTTGC	0	0	GCTTTG	0	0		ATGTCT	18	0.0509915	AGGCAC	3	0.00728155	GTGATG	1	0.00222222	GTACGC	1	0.000376081		TTGGGC	4	0.000913868	TTTAGC	3	0.000824402	GCACCA	0	0	ACCTGC	0
CTCAAC	279	0.0831595	GGACGG	23	0.0245203	CACGCA	1	0.00537634	AAATGT	4	0.000465062		TCAGCT	1	0.000194553	CTTGAC	1	0.000152462	CGAAGC	0	0	GGAACC	0	0		TACTCT	18	0.0509915	TGCCAA	3	0.00728155	TAGGAT	1	0.00222222	GTACCT	1	0.000376081		GACTCG	4	0.000913868	GCGCAA	3	0.000824402	GCACCC	0	0	GTCACC	0
CGCGCG	279	0.0831595	AGGCAT	23	0.0245203	TACCAA	1	0.00537634	AATCAT	4	0.000465062		GACCCG	1	0.000194553	TTACGC	1	0.000152462	ATAGAA	0	0	AGGACT	0	0		TATTGC	17	0.0481586	TACGCA	3	0.00728155	TAATCG	1	0.00222222	TTCAGT	1	0.000376081		CCTCGT	4	0.000913868	GTTCTT	3	0.000824402	GGTCAT	0	0	GTCACA	0
TGCATA	279	0.0831595	TTGTCA	23	0.0245203	ACTTTG	1	0.00537634	TGGGGT	4	0.000465062		AGGCGT	1	0.000194553	TTAGCG	1	0.000152462	TGTTAA	0	0	GGAAAT	0	0		GATGAA	17	0.0481586	AGTGAC	3	0.00728155	TGCACG	1	0.00222222	TTATAT	1	0.000376081		CAGGCG	3	0.000685401	ATGGCA	3	0.000824402	GTACGC	0	0	GTCAAT	0
TAGCTC	279	0.0831595	TTTAGG	23	0.0245203	GTACAT	1	0.00537634	GTGGTT	4	0.000465062		TCCGCT	1	0.000194553	TTAGAG	1	0.000152462	GCTTTC	0	0	GGAAAG	0	0		TGTTTC	17	0.0481586	CGTTTG	3	0.00728155	GATTGT	1	0.00222222	GGTCAC	1	0.000376081		TATCTG	3	0.000685401	GCGAGC	3	0.000824402	GCACAT	0	0	GTCAGA	0
GGACTT	279	0.0831595	TTATGC	23	0.0245203	CCCCGT	1	0.00537634	GCCCTG	4	0.000465062		TCCGGC	1	0.000194553	TTATTT	1	0.000152462	TATGAA	0	0	GCTCGC	0	0		TGTGCC	17	0.0481586	ATACGT	3	0.00728155	CGGCAA	1	0.00222222	GTGGTT	1	0.000376081		CACTTG	3	0.000685401	ATGCTC	3	0.000824402	GGTCCT	0	0	GTCACT	0
TTCGCT	278	0.0828614	TTCTAG	23	0.0245203	GTCTTA	1	0.00537634	TCAAAT	4	0.000465062		TCCATG	1	0.000194553	CTTTTG	1	0.000152462	CATCCA	0	0	CCTTGT	0	0		CTTTAG	17	0.0481586	TCCCGC	3	0.00728155	GCAACA	1	0.00222222	GGTTAC	1	0.000376081		CAATTT	3	0.000685401	CTCGGT	3	0.000824402	GGTACT	0	0	TATAGG	0
CTCGTG	278	0.0828614	TCGACA	23	0.0245203	CGCATG	1	0.00537634	GCATTT	4	0.000465062		TCCCAT	1	0.000194553	TTAGGG	1	0.000152462	GCTTGG	0	0	GCTCCT	0	0		GAGCAA	17	0.0481586	TACATG	3	0.00728155	CATGTG	1	0.00222222	GGTGGC	1	0.000376081		TCGGAT	3	0.000685401	GGCTAG	3	0.000824402	GGTAGT	0	0	GTATTT	0
CTCTCA	278	0.0828614	AGTGCG	23	0.0245203	ATCTCA	1	0.00537634	GCCTGC	4	0.000465062		CTCGTA	1	0.000194553	TTAGTC	1	0.000152462	GAACCG	0	0	GCTCCG	0	0		TATAAC	17	0.0481586	CGATAT	3	0.00728155	GTTTGT	1	0.00222222	GGTGCA	1	0.000376081		TCAACG	3	0.000685401	ACCACG	3	0.000824402	TCCAGC	0	0	CGTTCT	0
GTATCT	278	0.0828614	GTACTT	23	0.0245203	CTGTAT	1	0.00537634	GCCGCC	4	0.000465062		CAAGCG	1	0.000194553	TTAGTT	1	0.000152462	GCTATT	0	0	GCTCTC	0	0		TATTTT	17	0.0481586	TGTTTA	3	0.00728155	TTCGTA	1	0.00222222	CTGCAG	1	0.000376081		TATTTC	3	0.000685401	AGACCT	3	0.000824402	GCACTC	0	0	GTATTC	0
TAGAGG	277	0.0825633	ACGACT	22	0.0234542	AAGTAG	1	0.00537634	GCCGAC	4	0.000465062		TCAACG	1	0.000194553	TTTATT	1	0.000152462	GCTATG	0	0	TACCAA	0	0		TGCGCA	17	0.0481586	TGCACT	3	0.00728155	TTCGGT	1	0.00222222	CGTCTG	1	0.000376081		CAATCT	3	0.000685401	GGGCGA	3	0.000824402	ATACGT	0	0	AAGTTG	0
CACACG	277	0.0825633	TGGACG	22	0.0234542	CCTCGC	1	0.00537634	CCGGCA	4	0.000465062		AGTGGG	1	0.000194553	TTAGCA	1	0.000152462	GCTATC	0	0	GCTCGT	0	0		GTGAGC	17	0.0481586	GTAGTC	3	0.00728155	GAGCGG	1	0.00222222	AAGACG	1	0.000376081		AAGGTT	3	0.000685401	GGGCCA	3	0.000824402	GGTAAT	0	0	GTCAAC	0
CTACCT	277	0.0825633	TAGACT	22	0.0234542	ACCAAG	1	0.00537634	GATTCG	4	0.000465062		TCAAGG	1	0.000194553	TTTGGC	1	0.000152462	GCTCCC	0	0	GCTCGG	0	0		GAGCCA	17	0.0481586	TAACAT	3	0.00728155	GTTTCC	1	0.00222222	ACAGGC	1	0.000376081		CATGCG	3	0.000685401	GATTAT	3	0.000824402	GCAATA	0	0	TTTAGG	0
TGGGAG	277	0.0825633	TCACAC	22	0.0234542	GTACCT	1	0.00537634	GATGTG	4	0.000465062		CTGCGA	1	0.000194553	TTTGTT	1	0.000152462	GGCAGG	0	0	GCTCAC	0	0		TACAAG	17	0.0481586	CCTTCC	3	0.00728155	TTAGCG	1	0.00222222	AGGCGT	1	0.000376081		TGCATG	3	0.000685401	TGAGCC	3	0.000824402	GCAAGT	0	0	GCAGTT	0
TGCTAC	276	0.0822653	CTAACA	22	0.0234542	GAGCTG	1	0.00537634	GCCAGC	4	0.000465062		TATTTG	1	0.000194553	GCTCGC	1	0.000152462	GCTCAG	0	0	GTAAGC	0	0		TCGTAC	17	0.0481586	GTTTCC	3	0.00728155	GATTGA	1	0.00222222	TCGTAG	1	0.000376081		GAGGCA	3	0.000685401	TTCTTA	3	0.000824402	GGTGAT	0	0	AAGTGG	0
TAGTCA	276	0.0822653	TTAGCT	22	0.0234542	CACAGA	1	0.00537634	GCAGGC	4	0.000465062		GATTTG	1	0.000194553	TTTCGT	1	0.000152462	GCTCAC	0	0	GTCCCA	0	0		ATGGTG	17	0.0481586	GTTTGA	3	0.00728155	TTCGCA	1	0.00222222	GCGCAG	1	0.000376081		GCATGT	3	0.000685401	ATTTTT	3	0.000824402	GCAGAA	0	0	ACTGGG	0
GCACGG	276	0.0822653	CACCAG	22	0.0234542	CATATC	1	0.00537634	CTAGGA	4	0.000465062		CAGGTC	1	0.000194553	TTTCTT	1	0.000152462	AGGGTC	0	0	GCTATG	0	0		TAACAT	17	0.0481586	AGGCAA	3	0.00728155	CCGCTA	1	0.00222222	AAAGTT	1	0.000376081		ATTAAA	3	0.000685401	GCGTAC	3	0.000824402	GCAGAC	0	0	ACCTGA	0
CTAACG	276	0.0822653	TTGCTC	22	0.0234542	GTCACT	1	0.00537634	GGAACC	4	0.000465062		TCACGG	1	0.000194553	TTTTCG	1	0.000152462	GCTACT	0	0	GCTCCC	0	0		TACATT	17	0.0481586	ACACGC	3	0.00728155	AGGTGA	1	0.00222222	TATAGG	1	0.000376081		CAGCTT	3	0.000685401	ACGTCT	3	0.000824402	GGTGCA	0	0	GTCCCC	0
GCCCAC	276	0.0822653	TGCGTG	22	0.0234542	CATACG	1	0.00537634	GCTTTG	4	0.000465062		TCACGT	1	0.000194553	TTTTTC	1	0.000152462	GCTACG	0	0	AGCGAT	0	0		AAGACC	17	0.0481586	GTTCTC	3	0.00728155	AGAGTA	1	0.00222222	ACTGAG	1	0.000376081		AGGCAA	3	0.000685401	TAACTT	3	0.000824402	GGTAAC	0	0	GTCCCA	0
TAGGCA	276	0.0822653	CACCAC	22	0.0234542	GACGGT	1	0.00537634	GCTTCG	4	0.000465062		TCACTG	1	0.000194553	GATTTA	1	0.000152462	GGTTCA	0	0	GCTCAT	0	0		CTACAG	17	0.0481586	ATATCC	3	0.00728155	CTGCTT	1	0.00222222	ATACAA	1	0.000376081		TCCCTT	3	0.000685401	CTCAAC	3	0.000824402	CGCATA	0	0	TGCGGG	0
AGCACA	275	0.0819672	TTCGCC	21	0.0223881	TCTAGC	1	0.00537634	GGACGT	4	0.000465062		GCGGCA	1	0.000194553	TTTTTT	1	0.000152462	GCAGTG	0	0	GCTCAG	0	0		AGACCT	17	0.0481586	CGACAT	3	0.00728155	ATGAAA	1	0.00222222	CGCGCC	1	0.000376081		GCTAGG	3	0.000685401	GGGCAG	3	0.000824402	GCACGA	0	0	GTCATA	0
ATACTT	274	0.0816692	CCCACG	21	0.0223881	TCAGGG	1	0.00537634	CCTGGG	4	0.000465062		GCCCCA	1	0.000194553	TTCCGA	1	0.000152462	GCTAGT	0	0	GCTGGC	0	0		CTGAAG	17	0.0481586	TTTGGA	3	0.00728155	GCGAAA	1	0.00222222	AGCGGT	1	0.000376081		TCGCCC	3	0.000685401	CTGTTT	3	0.000824402	GAATAC	0	0	GTCAGT	0
GTATGC	274	0.0816692	GCTGCG	21	0.0223881	ACTTGT	1	0.00537634	GGAAGC	4	0.000465062		TCACGC	1	0.000194553	CCTTCA	1	0.000152462	GCTAGG	0	0	GGGGAA	0	0		TGCTAA	17	0.0481586	AGTTGC	3	0.00728155	TACAGA	1	0.00222222	AGCTAT	1	0.000376081		GAACTC	3	0.000685401	CGCGGC	3	0.000824402	TAGAGA	0	0	CCCTGA	0
ATTCCG	274	0.0816692	TTGCGG	21	0.0223881	GTCAAT	1	0.00537634	GCGAGT	4	0.000465062		TAAATA	1	0.000194553	TTTTTA	1	0.000152462	GCTAGC	0	0	GCTGCT	0	0		TCCACG	17	0.0481586	GTTCCC	3	0.00728155	AGAGGC	1	0.00222222	AAGCCA	1	0.000376081		TCCGAC	3	0.000685401	TCTACC	3	0.000824402	TAATAG	0	0	GTCATT	0
CGCACA	274	0.0816692	CTCGAT	21	0.0223881	TCTACG	1	0.00537634	GCGAAG	4	0.000465062		CTACAC	1	0.000194553	GGAATT	1	0.000152462	GCTGAC	0	0	GCTGCG	0	0		TTACTG	17	0.0481586	CTACAG	3	0.00728155	GCGCAT	1	0.00222222	ACCCAC	1	0.000376081		TCGATT	3	0.000685401	GTGGGC	3	0.000824402	GCACAA	0	0	AAAACA	0
AGCGTC	274	0.0816692	GTATCA	21	0.0223881	CATATT	1	0.00537634	GCCTGG	4	0.000465062		TCTCCC	1	0.000194553	CTCTCA	1	0.000152462	CCTCCG	0	0	GCTGTC	0	0		AACACA	17	0.0481586	AAGAGC	3	0.00728155	CGATAC	1	0.00222222	GATCCT	1	0.000376081		TCCACC	3	0.000685401	AATTGT	3	0.000824402	GCAATT	0	0	GTCATC	0
CTTTCC	274	0.0816692	ACTAGC	21	0.0223881	CGCCCA	1	0.00537634	GCTGAT	4	0.000465062		TCTCGG	1	0.000194553	GTCGCG	1	0.000152462	GTGGCA	0	0	AGAAGT	0	0		ATGGAA	17	0.0481586	CTGATC	3	0.00728155	ACGCGG	1	0.00222222	ACAGGG	1	0.000376081		GAACAT	3	0.000685401	TCAATT	3	0.000824402	GGTCTT	0	0	GTAGTT	0
TAACGT	274	0.0816692	CTATGT	21	0.0223881	TGACCC	1	0.00537634	GCTCAC	4	0.000465062		GCTAGG	1	0.000194553	GTGGCA	1	0.000152462	GCTCTG	0	0	GCTGGT	0	0		TTACGA	17	0.0481586	TATTAT	3	0.00728155	GCGGAA	1	0.00222222	GACGTT	1	0.000376081		CACGAT	3	0.000685401	TTATCG	3	0.000824402	GGTCTC	0	0	GTAGGT	0
GCGCGT	273	0.0813711	AATGCG	21	0.0223881	GACGCC	1	0.00537634	GCGCGT	4	0.000465062		GCAGTA	1	0.000194553	TTGAAC	1	0.000152462	GCTGCC	0	0	GCTGGG	0	0		GTCGCA	17	0.0481586	GGGCCG	3	0.00728155	GGTAGG	1	0.00222222	ATAGCG	1	0.000376081		TAGTGA	3	0.000685401	TTATGG	3	0.000824402	TTAGTG	0	0	GAGTGA	0
TACGTA	273	0.0813711	CTCGTA	21	0.0223881	CAGTGC	1	0.00537634	GAACTG	4	0.000465062		TCTAGT	1	0.000194553	AACTGA	1	0.000152462	TGTTTA	0	0	GCTGAC	0	0		TTTAGA	16	0.0453258	CTATGA	3	0.00728155	CGATCA	1	0.00222222	ACTACA	1	0.000376081		CATCAT	3	0.000685401	TCGGTG	3	0.000824402	CGCAAA	0	0	GTAGGC	0
GAGCGT	272	0.081073	CTCCCT	21	0.0223881	CCACGT	1	0.00537634	GAGACT	4	0.000465062		TCTCGT	1	0.000194553	TTGAGG	1	0.000152462	GCTGAT	0	0	AGCCAC	0	0		ATGTGC	16	0.0453258	CTCACA	3	0.00728155	GCGCGT	1	0.00222222	TTACAG	1	0.000376081		CACAGG	3	0.000685401	ACTTGT	3	0.000824402	GCACTT	0	0	TGTGCC	0
ATCCCG	272	0.081073	ATCACA	20	0.021322	CCATAT	1	0.00537634	GAAATC	4	0.000465062		TCTGGG	1	0.000194553	TTGGAG	1	0.000152462	GCTGAG	0	0	GCTCTT	0	0		TGTGTT	16	0.0453258	CTGAAA	3	0.00728155	TACATT	1	0.00222222	CTGTGG	1	0.000376081		TAAGGC	3	0.000685401	TCCCGT	3	0.000824402	GGTACC	0	0	ACCTTC	0
CTGCCT	272	0.081073	ATAGAT	20	0.021322	TCACTG	1	0.00537634	GACATC	4	0.000465062		TTTGTC	1	0.000194553	TTGTGT	1	0.000152462	GCTCGC	0	0	GCTCTG	0	0		ATGATA	16	0.0453258	CGCACG	3	0.00728155	GGTCTT	1	0.00222222	TTTTCG	1	0.000376081		TCAAAC	3	0.000685401	GACAGG	3	0.000824402	CAAACG	0	0	GTAGTA	0
AAGACG	272	0.081073	TTGCGA	20	0.021322	GTAGAG	1	0.00537634	GAATCT	4	0.000465062		TCTGTC	1	0.000194553	TTGTTC	1	0.000152462	GCGATA	0	0	GCTGCC	0	0		GCGCAC	16	0.0453258	CGCCAG	3	0.00728155	GTAGTG	1	0.00222222	GATCTG	1	0.000376081		TCCCGC	3	0.000685401	TCTGTG	3	0.000824402	CTACCC	0	0	GTAGCC	0
AGGCGT	272	0.081073	AGTACA	20	0.021322	TCGTTC	1	0.00537634	GAAGGG	4	0.000465062		TCTCTT	1	0.000194553	TTTAAG	1	0.000152462	GCTCCT	0	0	ACACCT	0	0		TTCTGG	16	0.0453258	CGCCTC	3	0.00728155	TTTGGC	1	0.00222222	AGACGG	1	0.000376081		GCGGCC	3	0.000685401	GATACA	3	0.000824402	GGTGAA	0	0	ACGAAA	0
TTATGA	272	0.081073	CAGCCA	20	0.021322	TCGTGC	1	0.00537634	CTTTAG	4	0.000465062		TCTGAT	1	0.000194553	AATGTT	1	0.000152462	AACATA	0	0	GCTGAT	0	0		CTAGGA	16	0.0453258	TGATAA	3	0.00728155	AGGCGG	1	0.00222222	AGGATT	1	0.000376081		CTTGGA	3	0.000685401	TCTTCA	3	0.000824402	CGCGTC	0	0	ACACCG	0
TACCGC	272	0.081073	CTGCTC	20	0.021322	TCGTGT	1	0.00537634	AACTTT	4	0.000465062		TCTGCG	1	0.000194553	TTGGGG	1	0.000152462	GCTCTC	0	0	GCTGAG	0	0		CTGATC	16	0.0453258	CGAGTG	3	0.00728155	CAGATC	1	0.00222222	CGTCAG	1	0.000376081		CTCTCT	3	0.000685401	AGGCGC	3	0.000824402	GCAATC	0	0	GTAGGA	0
TAACGA	271	0.080775	TGCATA	20	0.021322	CATCGC	1	0.00537634	CCCCCG	4	0.000465062		CGGGTT	1	0.000194553	TTGTGG	1	0.000152462	GCGGTC	0	0	GCATCG	0	0		ACCATT	16	0.0453258	GACCTG	3	0.00728155	CGCCAG	1	0.00222222	AGTGTT	1	0.000376081		TCGGCA	3	0.000685401	CGCGAC	3	0.000824402	GTATAC	0	0	ACCTTT	0
CAGTTT	271	0.080775	CACACT	20	0.021322	ACAAGT	1	0.00537634	CTTTGG	4	0.000465062		TCGAGG	1	0.000194553	TGGCGT	1	0.000152462	ATAGGA	0	0	GCATCC	0	0		AAGCGC	16	0.0453258	CTCCAT	3	0.00728155	TTTTGA	1	0.00222222	AGGCAC	1	0.000376081		CGGCGC	3	0.000685401	CGCCGC	3	0.000824402	TCGCGG	0	0	AGGATT	0
TGGGCC	271	0.080775	ATAGCC	20	0.021322	AAAGGA	1	0.00537634	CCAGCA	4	0.000465062		ATTTCT	1	0.000194553	TGGCTG	1	0.000152462	GCTCGG	0	0	CCAGTT	0	0		GGGCAT	16	0.0453258	CGGTTA	3	0.00728155	TTTTAG	1	0.00222222	AGACTA	1	0.000376081		CGGCCG	3	0.000685401	TCTGCG	3	0.000824402	GTATAA	0	0	GTATTA	0
TGCAAT	270	0.0804769	TACTTT	20	0.021322	CGGTTC	1	0.00537634	TTCTGG	4	0.000465062		TCGGTC	1	0.000194553	GCAGGG	1	0.000152462	TGGGGG	0	0	GCATAT	0	0		ATACAG	16	0.0453258	CGTAAA	3	0.00728155	AATTTT	1	0.00222222	ATCACT	1	0.000376081		TACTCT	3	0.000685401	CCTCTA	3	0.000824402	GATAAC	0	0	GTATGA	0
GGCCCA	270	0.0804769	CAGCGA	20	0.021322	ATAATA	1	0.00537634	CGGTGA	4	0.000465062		GGAAGG	1	0.000194553	ATGGCA	1	0.000152462	GCAGTT	0	0	GCATGG	0	0		GTGAGG	16	0.0453258	CAGTGC	3	0.00728155	TCTAGT	1	0.00222222	AGACTC	1	0.000376081		CGCTTG	3	0.000685401	GCGAGT	3	0.000824402	TGTTTC	0	0	ACCTGT	0
GGGCAT	270	0.0804769	CATGAC	20	0.021322	GTTTAT	1	0.00537634	ACAATT	4	0.000465062		GTATGA	1	0.000194553	TGGCCT	1	0.000152462	TCCCTA	0	0	GCATGC	0	0		ATCGAC	16	0.0453258	CGACCA	3	0.00728155	ACCCGC	1	0.00222222	GGCGGC	1	0.000376081		CTCTTT	3	0.000685401	TGATCT	3	0.000824402	GATACA	0	0	ACCTTA	0
GCGCCA	270	0.0804769	CGGCGG	20	0.021322	TGTTTA	1	0.00537634	CAAGGC	4	0.000465062		TCGAGC	1	0.000194553	TGGCGG	1	0.000152462	CCAGGA	0	0	TAACGG	0	0		CTTACC	16	0.0453258	CGGGCC	3	0.00728155	GCGCGG	1	0.00222222	ATTTAT	1	0.000376081		CGGACT	3	0.000685401	TCATTC	3	0.000824402	TGCAGG	0	0	GTATGT	0
CGCCAC	270	0.0804769	TTCAGT	20	0.021322	CTGACC	1	0.00537634	GGCCCA	4	0.000465062		TCGGTG	1	0.000194553	TGGGCG	1	0.000152462	GGTCCA	0	0	GCATCT	0	0		CTCGCT	16	0.0453258	GCACGC	3	0.00728155	TACAAC	1	0.00222222	CCACGG	1	0.000376081		CGGTGT	3	0.000685401	AGTTAT	3	0.000824402	ATATCG	0	0	CCATAG	0
TAACCT	270	0.0804769	GGACTT	20	0.021322	GACCTC	1	0.00537634	GATCGC	4	0.000465062		TCGTCC	1	0.000194553	TGGGTC	1	0.000152462	GGGATA	0	0	GCAGTC	0	0		TAGGTA	16	0.0453258	ATATTC	3	0.00728155	AGACTT	1	0.00222222	ACTGCA	1	0.000376081		CGGTGC	3	0.000685401	CACCGG	3	0.000824402	GATACC	0	0	GTATGC	0
ATACGT	270	0.0804769	GAGTAT	20	0.021322	AACGTC	1	0.00537634	CTGTCG	4	0.000465062		TGCCTG	1	0.000194553	TGGTAT	1	0.000152462	GCATAG	0	0	ACCGCT	0	0		AACCCG	16	0.0453258	GCCCGC	3	0.00728155	CGACAT	1	0.00222222	ATGCTG	1	0.000376081		GGCACG	3	0.000685401	CCAAGC	3	0.000824402	AAGTTG	0	0	ATCCTA	0
CGCATT	269	0.0801788	TATAGG	20	0.021322	GCATGG	1	0.00537634	ATTATT	4	0.000465062		TCTAAC	1	0.000194553	TGGTCT	1	0.000152462	GCATAC	0	0	GCAGGT	0	0		GGCGCA	16	0.0453258	TGTTTG	3	0.00728155	AGCGCA	1	0.00222222	CTCACG	1	0.000376081		CTAAAA	3	0.000685401	TCACGC	3	0.000824402	AGAGAG	0	0	CATGGG	0
TTCTGA	269	0.0801788	GTGACA	19	0.0202559	TAGGTC	1	0.00537634	ATATTC	4	0.000465062		TGACTT	1	0.000194553	AAGGGC	1	0.000152462	GACATT	0	0	AACTGA	0	0		TGCCCT	16	0.0453258	GATCAC	3	0.00728155	TTGGGT	1	0.00222222	ATCCCA	1	0.000376081		CGGGCT	3	0.000685401	TCACAG	3	0.000824402	GAGTTA	0	0	GTATAA	0
AGACTA	269	0.0801788	ACACAG	19	0.0202559	GTCCCA	1	0.00537634	GACGAC	4	0.000465062		TCGTAG	1	0.000194553	TGGGGC	1	0.000152462	GCAGCT	0	0	AAGGCA	0	0		TTATGC	16	0.0453258	TTTGGT	3	0.00728155	CTGGTC	1	0.00222222	CCGCAG	1	0.000376081		CGGGCG	3	0.000685401	AGCATG	3	0.000824402	GAGTTC	0	0	GTATCC	0
GTCCGT	269	0.0801788	TACTGG	19	0.0202559	ACAAGC	1	0.00537634	GTTCTA	4	0.000465062		CCACCC	1	0.000194553	TGGGGG	1	0.000152462	GCAGCG	0	0	GCATAC	0	0		GTTTCG	16	0.0453258	ACTACA	3	0.00728155	GCGGGA	1	0.00222222	AAATCA	1	0.000376081		GGTTCG	3	0.000685401	CTCGCT	3	0.000824402	GTATCA	0	0	GTATCA	0
GGGCCA	269	0.0801788	AATGTC	19	0.0202559	GATGCC	1	0.00537634	GAGCCT	4	0.000465062		TACGGC	1	0.000194553	TGCAGT	1	0.000152462	TTTGAA	0	0	TTCTCA	0	0		CTTTTG	16	0.0453258	GCGCGG	3	0.00728155	GCATCA	1	0.00222222	CTCGTA	1	0.000376081		CGGGTG	3	0.000685401	TTCATA	3	0.000824402	TGTCAG	0	0	GCGTCG	0
CTACCG	269	0.0801788	CGTACA	19	0.0202559	ACAACG	1	0.00537634	GAGATC	4	0.000465062		TACTCC	1	0.000194553	TGCTAC	1	0.000152462	GGCAAA	0	0	TCTAGA	0	0		ATGAAG	16	0.0453258	CTGCCG	3	0.00728155	AGGCAT	1	0.00222222	TCGTCT	1	0.000376081		GTATAG	3	0.000685401	ATGGAT	3	0.000824402	GTATAT	0	0	CATGTT	0
TTAACG	268	0.0798808	GCGTCA	19	0.0202559	GTTTTT	1	0.00537634	GAGCTT	4	0.000465062		CCCTTG	1	0.000194553	TGCTCC	1	0.000152462	ATGTCA	0	0	GCCACG	0	0		TCCCCA	15	0.0424929	CCCGGT	3	0.00728155	TTAAAA	1	0.00222222	CTACGG	1	0.000376081		GTCCCG	3	0.000685401	CACGCA	3	0.000824402	TATTTG	0	0	ACCGTA	0
GTACGT	268	0.0798808	AAGCAG	19	0.0202559	CTCTCT	1	0.00537634	GTAGGT	4	0.000465062		TACTGG	1	0.000194553	TGCTCT	1	0.000152462	GCAGGG	0	0	GCCACC	0	0		CGGCGG	15	0.0424929	TCTACA	3	0.00728155	CCCCAG	1	0.00222222	AGACAG	1	0.000376081		GGAGGC	3	0.000685401	TCCAGG	3	0.000824402	GATAAA	0	0	GTCTGC	0
TCTCGC	268	0.0798808	CTCGAG	19	0.0202559	TACTAC	1	0.00537634	GTAGCG	4	0.000465062		TACGGT	1	0.000194553	TGCCGC	1	0.000152462	GCAGGC	0	0	TTCCCG	0	0		GAGCAT	15	0.0424929	TGATAT	3	0.00728155	TAAATT	1	0.00222222	ACTTAT	1	0.000376081		GGAGGT	3	0.000685401	TTTTGT	3	0.000824402	CTAGCT	0	0	TCCGCG	0
TACCAC	268	0.0798808	GGGATA	19	0.0202559	ATTCAT	1	0.00537634	ATTTGG	4	0.000465062		TACGTG	1	0.000194553	TGCCTT	1	0.000152462	GTCGGT	0	0	GCCAAT	0	0		CCGACA	15	0.0424929	TTCTGT	3	0.00728155	TATAAT	1	0.00222222	AAGTCA	1	0.000376081		CGCCGG	3	0.000685401	ATTTAT	3	0.000824402	TTATCA	0	0	GTCTTC	0
TTGTTC	268	0.0798808	CTTCTT	19	0.0202559	GCCGAG	1	0.00537634	GTATTC	4	0.000465062		TACTAT	1	0.000194553	TGCGGT	1	0.000152462	GCATTT	0	0	GCCAGG	0	0		TCGGCA	15	0.0424929	CTTTTG	3	0.00728155	CTCCAG	1	0.00222222	ACAAAA	1	0.000376081		ACCAGG	3	0.000685401	TACTAG	3	0.000824402	GTAGGA	0	0	GTCTTA	0
CCCACC	268	0.0798808	TGGGTA	19	0.0202559	GGAAGA	1	0.00537634	GTATGT	4	0.000465062		TACTGT	1	0.000194553	TGCTGG	1	0.000152462	GCATTG	0	0	CACCAA	0	0		GTAGTG	15	0.0424929	TGCATT	3	0.00728155	GCAGTC	1	0.00222222	AGGGAT	1	0.000376081		CTGCGG	3	0.000685401	TGTAGC	3	0.000824402	ATCGTC	0	0	GTCTGT	0
CACCGG	267	0.0795827	TTGATA	18	0.0191898	TACGGG	1	0.00537634	GTAGTC	4	0.000465062		TAGCCC	1	0.000194553	TCAGTA	1	0.000152462	CCGCGA	0	0	ACCGGC	0	0		GGAGCG	15	0.0424929	CTGCCA	3	0.00728155	GCAGTA	1	0.00222222	TATTAT	1	0.000376081		GTCCGC	3	0.000685401	ATGTAA	3	0.000824402	GTAGGC	0	0	CGGAGG	0
GCCCGG	267	0.0795827	CTGGGG	18	0.0191898	AGCCAG	1	0.00537634	GTAACG	4	0.000465062		TAGCTC	1	0.000194553	TTGGTA	1	0.000152462	GCCGTA	0	0	GCCACT	0	0		GGGCGA	15	0.0424929	CTGTTG	3	0.00728155	GCAGGT	1	0.00222222	AGAATA	1	0.000376081		CGATTC	3	0.000685401	AACGCA	3	0.000824402	GATCAA	0	0	GTCTAT	0
TGACTA	267	0.0795827	GATCCG	18	0.0191898	CTCTTT	1	0.00537634	GTAAAC	4	0.000465062		TAGCTT	1	0.000194553	TGGCAC	1	0.000152462	GCCAAT	0	0	GCATTG	0	0		GAGCAG	15	0.0424929	AAATTT	3	0.00728155	TACCGT	1	0.00222222	CATAGG	1	0.000376081		CGTCGC	3	0.000685401	TGTAAC	3	0.000824402	GATCAT	0	0	ACCGTC	0
TACCGA	267	0.0795827	GCACCG	18	0.0191898	TACTGT	1	0.00537634	GTAGAT	4	0.000465062		TACTTC	1	0.000194553	TGCTGT	1	0.000152462	GCCAAG	0	0	GCATTC	0	0		ACGCAT	15	0.0424929	GAGCAA	3	0.00728155	AGCATC	1	0.00222222	GAGCGT	1	0.000376081		CGCGTG	3	0.000685401	TTAAGC	3	0.000824402	ATCGCG	0	0	GTCTCT	0
GTCTAC	267	0.0795827	ATTACT	18	0.0191898	GTTTCC	1	0.00537634	TTTCGA	4	0.000465062		TAGAGT	1	0.000194553	TGGAAC	1	0.000152462	GCCAAC	0	0	CGAGCC	0	0		ATCGCA	15	0.0424929	GAGCCA	3	0.00728155	ATACAC	1	0.00222222	AATTGT	1	0.000376081		CGCTGG	3	0.000685401	TGGGCG	3	0.000824402	GATCCT	0	0	CGAGGA	0
GTCGAT	267	0.0795827	GTTCTG	18	0.0191898	ACGTTT	1	0.00537634	GTACCT	4	0.000465062		AGCTAC	1	0.000194553	TGGAAT	1	0.000152462	GGCAAC	0	0	ATCGTA	0	0		TGCCAG	15	0.0424929	TTCTTC	3	0.00728155	GGCGCG	1	0.00222222	CTTCGT	1	0.000376081		AGAATC	3	0.000685401	CGAGAA	3	0.000824402	GATCCA	0	0	GTCTCC	0
GTCGCG	266	0.0792846	CAACAT	18	0.0191898	TAGCAA	1	0.00537634	GTAACT	4	0.000465062		GCTGGG	1	0.000194553	TGTCGT	1	0.000152462	GCATCT	0	0	GCCAAG	0	0		TGTATA	15	0.0424929	GTTCAT	3	0.00728155	CGCGAC	1	0.00222222	AGGGCA	1	0.000376081		CGCCGA	3	0.000685401	AGCCAA	3	0.000824402	GTACGT	0	0	GTGAGT	0
TATAGT	266	0.0792846	GTTTTT	18	0.0191898	ACTCCG	1	0.00537634	AGGACG	4	0.000465062		TACATT	1	0.000194553	TGTGGC	1	0.000152462	GCATCG	0	0	GCCAAC	0	0		TTCTTC	15	0.0424929	GACACA	3	0.00728155	TTACCA	1	0.00222222	ACAAAC	1	0.000376081		TCTGCA	3	0.000685401	AACGGA	3	0.000824402	GATACT	0	0	ACCGGA	0
ATGCCG	266	0.0792846	CCGACA	18	0.0191898	CGTATG	1	0.00537634	GTGTCT	4	0.000465062		TGATGC	1	0.000194553	TGTGGT	1	0.000152462	ATCGCA	0	0	CTTACA	0	0		TGCGCT	15	0.0424929	TTCTAG	3	0.00728155	TGCAAG	1	0.00222222	TGGGCG	1	0.000376081		AATTAC	3	0.000685401	AATATT	3	0.000824402	GAACAG	0	0	ACCGGC	0
CTAGGT	266	0.0792846	TGCACC	18	0.0191898	TAGGTT	1	0.00537634	GAATTG	4	0.000465062		CGGGTA	1	0.000194553	TGTTAC	1	0.000152462	CGGCTC	0	0	GCATTT	0	0		GTAGTC	15	0.0424929	ATGATA	3	0.00728155	CGACGA	1	0.00222222	ATATCA	1	0.000376081		CGCGGC	3	0.000685401	GAGCAA	3	0.000824402	GGGTTC	0	0	TGGGGG	0
TTAGCA	266	0.0792846	GTATGA	18	0.0191898	ACATGA	1	0.00537634	GTTAGG	4	0.000465062		TACAGG	1	0.000194553	TGTCTT	1	0.000152462	GCATGT	0	0	GCACCC	0	0		CTGGGC	15	0.0424929	ATGCCT	3	0.00728155	ATGTGG	1	0.00222222	CTAAAG	1	0.000376081		CTACTT	3	0.000685401	CGGGGT	3	0.000824402	GATAGA	0	0	CCAGAA	0
GGGCCG	266	0.0792846	TCCCGC	18	0.0191898	CACGCC	1	0.00537634	AATTGG	4	0.000465062		CTAATA	1	0.000194553	TGTGCC	1	0.000152462	GCATGG	0	0	CTGTGA	0	0		CGTAGC	15	0.0424929	TGTCGA	3	0.00728155	AGCCTA	1	0.00222222	CTATCC	1	0.000376081		GGGCAG	3	0.000685401	ACGTCA	3	0.000824402	CTGAAG	0	0	ACCGCT	0
TGGAGA	265	0.0789866	TTATGT	18	0.0191898	CTGCCT	1	0.00537634	GTTAAG	4	0.000465062		TACATG	1	0.000194553	GACCCA	1	0.000152462	GCATGC	0	0	GCACAT	0	0		CTCGCC	15	0.0424929	CCAGGG	3	0.00728155	GCCAAC	1	0.00222222	CCACAG	1	0.000376081		CCCGCA	3	0.000685401	AAATCT	3	0.000824402	GTAGTA	0	0	GTGAGA	0
CGACTT	265	0.0789866	GCCCAC	18	0.0191898	AATATA	1	0.00537634	GTGATG	4	0.000465062		GGTAGA	1	0.000194553	TGTTAG	1	0.000152462	GGTCAC	0	0	GCACAG	0	0		GAGATT	15	0.0424929	GTGTTG	3	0.00728155	GCGTCA	1	0.00222222	CTACTG	1	0.000376081		GGGCAC	3	0.000685401	CGATGT	3	0.000824402	GATATC	0	0	CCCCTG	0
ATACCA	265	0.0789866	AGGCAG	17	0.0181237	CGGATC	1	0.00537634	GTCCTT	4	0.000465062		GATACA	1	0.000194553	TAAGCT	1	0.000152462	GCAATT	0	0	GCACGC	0	0		GTACTT	15	0.0424929	TGGGAT	3	0.00728155	CGACGT	1	0.00222222	GTGGAG	1	0.000376081		AGCTTA	3	0.000685401	TAAAGG	3	0.000824402	CGACTG	0	0	CAAAGG	0
TGGCGT	265	0.0789866	TGCTCG	17	0.0181237	GTTCTC	1	0.00537634	GTCCGG	4	0.000465062		TATCTC	1	0.000194553	TTAAAG	1	0.000152462	GCAATG	0	0	TGCAGT	0	0		ATACCA	15	0.0424929	TCACGC	3	0.00728155	GCTCCA	1	0.00222222	ACACCA	1	0.000376081		GGGCGT	3	0.000685401	CCCACG	3	0.000824402	ACACAG	0	0	TTCGAG	0
GTATTC	264	0.0786885	TAGACG	17	0.0181237	ACGTCC	1	0.00537634	GTGGAG	4	0.000465062		TCGGGA	1	0.000194553	CATGTT	1	0.000152462	GTCAGA	0	0	GCACCT	0	0		GGTACA	15	0.0424929	CCAGTT	3	0.00728155	TTACTC	1	0.00222222	ACGGAC	0	0		CTACTC	3	0.000685401	TACATT	3	0.000824402	GATATA	0	0	TGCGAG	0
CTCCTT	264	0.0786885	AACCAC	17	0.0181237	TTAGCG	1	0.00537634	AACGGC	4	0.000465062		CATAGA	1	0.000194553	TGTTGG	1	0.000152462	CCCGAA	0	0	GCACCG	0	0		GTTTGA	15	0.0424929	AGCTAT	3	0.00728155	TTACGC	1	0.00222222	GTTTGG	0	0		AATTTT	3	0.000685401	CGAGCA	3	0.000824402	GTCAGA	0	0	GTGAAT	0
ATGATA	264	0.0786885	GTCCCC	17	0.0181237	GGGTGA	1	0.00537634	GTGATT	4	0.000465062		ATCACG	1	0.000194553	TGTTGT	1	0.000152462	GAAGAA	0	0	GCAATC	0	0		CGGACG	15	0.0424929	TCACAA	3	0.00728155	GGACTT	1	0.00222222	TCTAGG	0	0		CTCCCC	3	0.000685401	TTACTG	3	0.000824402	GTCACT	0	0	TCAAAG	0
TCCAAT	264	0.0786885	TAGGTG	17	0.0181237	TGCATG	1	0.00537634	GGCTTG	4	0.000465062		TACGAC	1	0.000194553	AGTATC	1	0.000152462	GCACAG	0	0	GTTTTC	0	0		TGTCTA	15	0.0424929	TATTGC	3	0.00728155	ATAATC	1	0.00222222	ACTTTC	0	0		GGCTGT	3	0.000685401	GAGGGC	3	0.000824402	AAAGAG	0	0	GTCGAT	0
TACTTG	264	0.0786885	TAAGAG	17	0.0181237	TCCTGA	1	0.00537634	GGCTAT	4	0.000465062		TATAAG	1	0.000194553	CTAAGT	1	0.000152462	GCACAC	0	0	GCAAGT	0	0		TGTCTC	14	0.0396601	TGCACC	3	0.00728155	TTACTA	1	0.00222222	AGCCTA	0	0		GGCTAG	3	0.000685401	CCGAAC	3	0.000824402	GGACTG	0	0	GTCCTT	0
TATTGA	264	0.0786885	CTATCT	17	0.0181237	CGGGTG	1	0.00537634	GGCGAC	4	0.000465062		TATAGG	1	0.000194553	AATCGC	1	0.000152462	GACCGA	0	0	GAGTCA	0	0		TTTGGT	14	0.0396601	TGCCAT	3	0.00728155	AATACT	1	0.00222222	GCAAAC	0	0		CTCACC	3	0.000685401	CGAGGG	3	0.000824402	AGGCGT	0	0	GACGCC	0
AGACGT	264	0.0786885	AGACTG	17	0.0181237	CGGAAC	1	0.00537634	GGGCAC	4	0.000465062		TTATGA	1	0.000194553	TGTAAT	1	0.000152462	CCAGTA	0	0	GCACAC	0	0		TTCGCC	14	0.0396601	TATGAC	3	0.00728155	ATAAGA	1	0.00222222	ACGAGT	0	0		ACGGTA	3	0.000685401	TCCTTT	3	0.000824402	GTCAAT	0	0	GTCCTC	0
GGTACA	264	0.0786885	CCCCAT	17	0.0181237	CGGGCC	1	0.00537634	TCTCGC	4	0.000465062		TATCAT	1	0.000194553	TGTAGG	1	0.000152462	GCAACG	0	0	CCTATC	0	0		TTCGAC	14	0.0396601	TAGTTG	2	0.00485437	TACTCA	1	0.00222222	TCCAGT	0	0		CTAGCT	3	0.000685401	CTACTG	3	0.000824402	CCACGC	0	0	ACCTAC	0
CGACGC	263	0.0783905	TACGCT	17	0.0181237	AATTGT	1	0.00537634	GGGAGG	4	0.000465062		TATACC	1	0.000194553	TGGTGT	1	0.000152462	GCAACC	0	0	GCAATT	0	0		GTCGCG	14	0.0396601	TCGGCA	2	0.00485437	GAGTCA	1	0.00222222	GAGATC	0	0		TTAGAC	3	0.000685401	TGAGTC	3	0.000824402	GCTATG	0	0	ACCTAT	0
TAGTGA	263	0.0783905	GTCCGC	17	0.0181237	CGGGAG	1	0.00537634	AGTCGG	4	0.000465062		TATACG	1	0.000194553	TGGTTG	1	0.000152462	CATAAA	0	0	GCAATG	0	0		AGTACA	14	0.0396601	GCCCAA	2	0.00485437	TTTCGA	1	0.00222222	GTTATA	0	0		AAGCCT	3	0.000685401	GTATTT	3	0.000824402	GAGGTT	0	0	GTCGAA	0
ACACGT	263	0.0783905	GAGATC	17	0.0181237	CTGCGG	1	0.00537634	GCGCGG	4	0.000465062		TATACT	1	0.000194553	TGGTTT	1	0.000152462	GCAAGT	0	0	GCAGCC	0	0		ATGTTT	14	0.0396601	CGCCGC	2	0.00485437	CCGGGG	1	0.00222222	TAAATG	0	0		CTAAAG	3	0.000685401	CGTAAT	3	0.000824402	CCTATG	0	0	GTCCGC	0
TAAACA	263	0.0783905	TTATAT	17	0.0181237	CGGGGT	1	0.00537634	TCACCT	4	0.000465062		TATCCC	1	0.000194553	TGTAGT	1	0.000152462	GCAAGG	0	0	CGAATG	0	0		TTCTTG	14	0.0396601	TATAAC	2	0.00485437	GAGTCT	1	0.00222222	GTTTGT	0	0		CTCGAT	3	0.000685401	AGAGTC	3	0.000824402	GTCCAC	0	0	GTCCGA	0
TGATGT	263	0.0783905	TGCATC	17	0.0181237	GCCTGG	1	0.00537634	GGCCTC	4	0.000465062		TATTAC	1	0.000194553	TGTCCC	1	0.000152462	GAACAA	0	0	GCAGAT	0	0		AGGAGG	14	0.0396601	TGTAGC	2	0.00485437	GGCTCG	1	0.00222222	GTTAGT	0	0		GGTCGC	3	0.000685401	GGCCAT	3	0.000824402	GTCCAA	0	0	GTCCCT	0
CGTCAG	263	0.0783905	TGCCCG	17	0.0181237	AATTTG	1	0.00537634	GGCCGG	4	0.000465062		TATTAG	1	0.000194553	TGTCCG	1	0.000152462	TAAGCA	0	0	GCAGAG	0	0		TACTCC	14	0.0396601	TGTATA	2	0.00485437	TAGGTT	1	0.00222222	GTTATT	0	0		GGTATC	3	0.000685401	GATGAG	3	0.000824402	GAGGGC	0	0	ACCTCA	0
GTGGAT	263	0.0783905	TATAAG	16	0.0170576	AGAAGA	1	0.00537634	GGCATG	4	0.000465062		TATTAT	1	0.000194553	TGTCGC	1	0.000152462	TCATGA	0	0	GCAGGC	0	0		TGCATC	14	0.0396601	ATGGAA	2	0.00485437	GGACGA	1	0.00222222	GGGTGG	0	0		GGTATT	3	0.000685401	CCTTCA	3	0.000824402	TCCTCG	0	0	GTCCGT	0
ATGTTG	263	0.0783905	GTGAGT	16	0.0170576	CTGCGT	1	0.00537634	GGTATG	4	0.000465062		TATCCG	1	0.000194553	TGTATC	1	0.000152462	GCACTG	0	0	CGGGTC	0	0		GTCCAA	14	0.0396601	TCGTCC	2	0.00485437	TCCACA	1	0.00222222	TAAAAT	0	0		GGTGAG	3	0.000685401	CGTGCT	3	0.000824402	GAGGTA	0	0	CCAAGC	0
TCCGCA	262	0.0780924	GTATCC	16	0.0170576	TAGGCC	1	0.00537634	GGTAGT	4	0.000465062		TATCCT	1	0.000194553	TAGAAC	1	0.000152462	GCACTC	0	0	GCAGCT	0	0		GTATCC	14	0.0396601	GCAGTT	2	0.00485437	AGTTGT	1	0.00222222	AGTCTG	0	0		GTTGGA	3	0.000685401	AGTAGT	3	0.000824402	GTCATA	0	0	TTAGTG	0
TACTCC	262	0.0780924	CATGGC	16	0.0170576	TTAAGA	1	0.00537634	TAGGGA	4	0.000465062		TATCGT	1	0.000194553	TGTCAG	1	0.000152462	CAACTC	0	0	CTCTCA	0	0		TAGGAT	14	0.0396601	GCTTCA	2	0.00485437	GATACT	1	0.00222222	TTAGAA	0	0		GGTGAC	3	0.000685401	CGGATA	3	0.000824402	ATACCG	0	0	GTCGTA	0
TAGAAC	262	0.0780924	TTGAAC	16	0.0170576	CGGCTT	1	0.00537634	GGTTAT	4	0.000465062		TAGGAG	1	0.000194553	CACTTA	1	0.000152462	GCAGAT	0	0	GCACTC	0	0		ATGAAC	14	0.0396601	TGTAGA	2	0.00485437	GGTGTG	1	0.00222222	GTTAAT	0	0		ACCCGG	3	0.000685401	TGCGCC	3	0.000824402	TTACGG	0	0	GTCGGT	0
TGCCTC	262	0.0780924	CGGCAC	16	0.0170576	ACAGCC	1	0.00537634	CAGGCA	4	0.000465062		TAGGGG	1	0.000194553	GGCGTC	1	0.000152462	GCAGAG	0	0	GATACG	0	0		AGGGCT	14	0.0396601	TTCGTA	2	0.00485437	GATACA	1	0.00222222	GTTAAA	0	0		ACCCGC	3	0.000685401	TACAAC	3	0.000824402	TATAGG	0	0	ACCTAA	0
GCGACA	262	0.0780924	GTCCCA	16	0.0170576	CGGCGG	1	0.00537634	TTCTGA	4	0.000465062		TAGGGT	1	0.000194553	CCGACA	1	0.000152462	GCAGAC	0	0	GCACGT	0	0		TAGGTG	14	0.0396601	CCAAGA	2	0.00485437	GGACGT	1	0.00222222	CTTGGG	0	0		TTCTTA	3	0.000685401	TAAGTT	3	0.000824402	GTATGA	0	0	GTCGTT	0
ATACTA	262	0.0780924	ATGTTT	16	0.0170576	CGGCGC	1	0.00537634	ATGGTA	4	0.000465062		TAGGTG	1	0.000194553	GGCTAT	1	0.000152462	CTCCTC	0	0	GCACGG	0	0		GATCTA	14	0.0396601	CTGTAT	2	0.00485437	TTATGG	1	0.00222222	CGTCCG	0	0		GGGGCC	3	0.000685401	TAACTA	3	0.000824402	GTATCT	0	0	GATCTT	0
ATGAAT	262	0.0780924	TAACTA	16	0.0170576	TAACGT	1	0.00537634	GGGCCG	4	0.000465062		ATTTCG	1	0.000194553	GGCGCG	1	0.000152462	CTTAGA	0	0	GCAGAC	0	0		CTACTC	14	0.0396601	TCTAGG	2	0.00485437	GTTCGT	1	0.00222222	CCAGTG	0	0		GGCCTC	3	0.000685401	TTCTTG	3	0.000824402	GAGTCA	0	0	GTCGTC	0
AGCACG	261	0.0777943	CTATAT	16	0.0170576	AATACA	1	0.00537634	GGGCCC	4	0.000465062		TAGGCC	1	0.000194553	GGCGCT	1	0.000152462	GCACCG	0	0	GATGTT	0	0		GGCGTT	14	0.0396601	GATGCC	2	0.00485437	CCTCCG	1	0.00222222	GCCGTT	0	0		CGTGAC	3	0.000685401	CTTTCG	3	0.000824402	GAGTCC	0	0	TTAGCA	0
GAGATT	261	0.0777943	GAGCCA	16	0.0170576	TACAAG	1	0.00537634	GTGTGA	4	0.000465062		TAGGCT	1	0.000194553	GGCGGT	1	0.000152462	TCCGGA	0	0	GCACTT	0	0		GCGCAG	13	0.0368272	ATCAGT	2	0.00485437	GTTCTA	1	0.00222222	ACGGCA	0	0		CGTCGT	3	0.000685401	TAAAAA	3	0.000824402	AGATGG	0	0	GTCGCC	0
CCCCTT	260	0.0774963	TTCTTC	16	0.0170576	ACACGC	1	0.00537634	GGGGGC	4	0.000465062		TAGGTT	1	0.000194553	GCTCAT	1	0.000152462	TGAATA	0	0	AGGGCA	0	0		GTAACA	13	0.0368272	GATTCC	2	0.00485437	GCGGAT	1	0.00222222	GGAAGC	0	0		CGTGCT	3	0.000685401	ATCGCG	3	0.000824402	AATGCG	0	0	GTCGCA	0
GAGCTT	260	0.0774963	GCGCCA	16	0.0170576	CTCAGG	1	0.00537634	GGGGCT	4	0.000465062		TAGTTT	1	0.000194553	GGGAAT	1	0.000152462	GCACGT	0	0	GCCTCG	0	0		TGCCTT	13	0.0368272	GATGCG	2	0.00485437	CGGGCG	1	0.00222222	GGCGCG	0	0		CGTGCG	3	0.000685401	CGACGA	3	0.000824402	GAGTGC	0	0	GTCGGC	0
TTATAG	260	0.0774963	CGCGGA	16	0.0170576	CTAGGC	1	0.00537634	ATATCG	4	0.000465062		ACCTTT	1	0.000194553	GGGACT	1	0.000152462	GCACGG	0	0	CGGCAA	0	0		TCTACA	13	0.0368272	GCGGCC	2	0.00485437	GCCACG	1	0.00222222	GTTAGA	0	0		CTGCGT	3	0.000685401	TAAACG	3	0.000824402	CAGAGG	0	0	GCTGTG	0
CTGGGA	260	0.0774963	GAGCGA	16	0.0170576	TAACTT	1	0.00537634	AGGGGT	4	0.000465062		TATAAC	1	0.000194553	GGGAGG	1	0.000152462	GCACGC	0	0	CGTTTG	0	0		TGCAAG	13	0.0368272	GCGCAC	2	0.00485437	GAGCGC	1	0.00222222	TAAAAA	0	0		TACGTC	3	0.000685401	AGCAAT	3	0.000824402	GTATCC	0	0	GTCGCT	0
ATGATC	260	0.0774963	TATGCG	16	0.0170576	GGCACA	1	0.00537634	ACTTTT	4	0.000465062		CATTGA	1	0.000194553	CGGGGA	1	0.000152462	GCCGTT	0	0	GCCTAT	0	0		GTTCAG	13	0.0368272	GACCCT	2	0.00485437	TATATA	1	0.00222222	TAAAAC	0	0		CGCGGG	3	0.000685401	GTGTTT	3	0.000824402	TAAAAA	0	0	TACGCT	0
TGAAAC	260	0.0774963	TCCCAG	16	0.0170576	CTACAT	1	0.00537634	ATACGT	4	0.000465062		TAGTGT	1	0.000194553	GGCTGG	1	0.000152462	GCCGTG	0	0	AGCAAA	0	0		ACCCAC	13	0.0368272	GCGCTG	2	0.00485437	TGTTCT	1	0.00222222	GTTTTT	0	0		CCCCAT	3	0.000685401	CGGCTG	3	0.000824402	CAGCCG	0	0	AATCAT	0
CTCGTA	259	0.0771982	CACCCA	16	0.0170576	CTACAG	1	0.00537634	AGCAAC	4	0.000465062		TAGTTC	1	0.000194553	GGCTTG	1	0.000152462	GCCGTC	0	0	GCCTGC	0	0		AGCACA	13	0.0368272	ACTCCA	2	0.00485437	CCGGAT	1	0.00222222	ACGGCC	0	0		CTTCCA	3	0.000685401	TACTAA	3	0.000824402	GCCGCT	0	0	CAGTCG	0
TACTTC	259	0.0771982	CTTGGG	16	0.0170576	CGTTAG	1	0.00537634	CGCGGA	4	0.000465062		AGTTTT	1	0.000194553	GCCTGG	1	0.000152462	CTGGTG	0	0	AAGAAC	0	0		ATGGCT	13	0.0368272	CATTAC	2	0.00485437	ATCGCG	1	0.00222222	ACGCAC	0	0		AGTATC	3	0.000685401	TACGCG	3	0.000824402	GAGTAA	0	0	GGTACT	0
TGCGCT	259	0.0771982	TATTGT	15	0.0159915	CTCCCG	1	0.00537634	ATTACC	4	0.000465062		TTCCCC	1	0.000194553	TCGCGC	1	0.000152462	GCCTAT	0	0	GGTACA	0	0		CTATTT	13	0.0368272	GCCGAG	2	0.00485437	AATTCG	1	0.00222222	ACGCGT	0	0		TACTAT	3	0.000685401	TATATA	3	0.000824402	CTGGGG	0	0	TACGGC	0
CGGACA	259	0.0771982	CTATGA	15	0.0159915	CTACCT	1	0.00537634	ATACAT	4	0.000465062		GGGCTA	1	0.000194553	GGAGCC	1	0.000152462	GCCTAG	0	0	GCCGTG	0	0		CTGTAG	13	0.0368272	GCGACC	2	0.00485437	GTTTTA	1	0.00222222	CCGCTA	0	0		TACGTG	3	0.000685401	CGTCTC	3	0.000824402	GTATTC	0	0	AGGCGG	0
GTCGTA	259	0.0771982	GTAGTG	15	0.0159915	CTCCCT	1	0.00537634	ATGGCT	4	0.000465062		TGGAGA	1	0.000194553	TAGTTA	1	0.000152462	GCCTAC	0	0	GCCGTC	0	0		GCACAA	13	0.0368272	TATAGA	2	0.00485437	GTCCAA	1	0.00222222	ATTTTC	0	0		CCATGC	3	0.000685401	GGGATT	3	0.000824402	GTATTA	0	0	ATAGCG	0
GCCACG	259	0.0771982	TTGCCC	15	0.0159915	AACATA	1	0.00537634	ATGCTT	4	0.000465062		TTTTGA	1	0.000194553	GGACCG	1	0.000152462	GACAAA	0	0	TGCATT	0	0		TACTAC	13	0.0368272	AATGCA	2	0.00485437	TATATC	1	0.00222222	AGCGTG	0	0		CCCTAG	3	0.000685401	TTCATC	3	0.000824402	ATTATG	0	0	TACGAA	0
CTCCGC	259	0.0771982	TAAACA	15	0.0159915	TAAGGG	1	0.00537634	ACTAGC	4	0.000465062		TTCATG	1	0.000194553	GGACTT	1	0.000152462	GCCGCG	0	0	GCCGGT	0	0		GCCCAC	13	0.0368272	CTTACT	2	0.00485437	TGTTAC	1	0.00222222	ACGCAA	0	0		CCCGTT	3	0.000685401	TAGTTC	3	0.000824402	GAGTAC	0	0	ACAGCT	0
GTACAC	259	0.0771982	GTCCAC	15	0.0159915	TAAGAG	1	0.00537634	ATTATC	4	0.000465062		GGCCGA	1	0.000194553	CACGCA	1	0.000152462	TAGTCA	0	0	TACATA	0	0		CTGTGA	13	0.0368272	GGTCGG	2	0.00485437	AGGACG	1	0.00222222	ACGCTT	0	0		CCCTGC	3	0.000685401	TGTCTA	3	0.000824402	GGGACT	0	0	ACAGGA	0
TTGAGG	259	0.0771982	GTATGC	15	0.0159915	TAAGTC	1	0.00537634	ATGGGT	4	0.000465062		TCAACC	1	0.000194553	CCTCCA	1	0.000152462	TAAAGT	0	0	GCCTAC	0	0		GCGCTT	13	0.0368272	TTATAG	2	0.00485437	TTAATC	1	0.00222222	ACGCTC	0	0		GATTCC	3	0.000685401	GTGGGG	3	0.000824402	TCCCTG	0	0	TACGAT	0
TGCTCG	258	0.0769001	CTACTG	15	0.0159915	CTAGTG	1	0.00537634	TCTCCA	4	0.000465062		ATCACA	1	0.000194553	CCTCGA	1	0.000152462	GCTGCA	0	0	TTGTGC	0	0		CTGAAT	13	0.0368272	TTATCG	2	0.00485437	ATAGAA	1	0.00222222	GCTAGC	0	0		CTTCCT	3	0.000685401	ACGCTT	3	0.000824402	CTCGCG	0	0	GGATGT	0
CTCGAT	258	0.0769001	GTTCTA	15	0.0159915	TAAGCG	1	0.00537634	ACGTCG	4	0.000465062		TCTGCT	1	0.000194553	GGCCGC	1	0.000152462	GCCGGG	0	0	GCCGTT	0	0		GAGCGA	13	0.0368272	GGTCCA	2	0.00485437	CCGTCA	1	0.00222222	GTTGGA	0	0		TACCCG	3	0.000685401	TCACAT	3	0.000824402	GATTCA	0	0	TACGAC	0
GCGCGC	258	0.0769001	AAGACC	15	0.0159915	CTATTC	1	0.00537634	TCTCGT	4	0.000465062		TACCGA	1	0.000194553	GGCCTC	1	0.000152462	GCCGGC	0	0	GCGACT	0	0		GCGCCT	13	0.0368272	AACACT	2	0.00485437	AGTGCG	1	0.00222222	AGCTCC	0	0		GGTTCC	3	0.000685401	ATGTCT	3	0.000824402	GATTAC	0	0	ACGGAC	0
TATAGG	258	0.0769001	TAACAG	15	0.0159915	CTCAAC	1	0.00537634	AGGTGG	4	0.000465062		AATACA	1	0.000194553	GGCACG	1	0.000152462	GGTAGA	0	0	GCGACG	0	0		GCCTGC	13	0.0368272	CACTAA	2	0.00485437	TAGTGG	1	0.00222222	ACGCCT	0	0		CGGCCA	3	0.000685401	CTAACC	3	0.000824402	GTAAAT	0	0	ACACGG	0
GTCGTT	258	0.0769001	TTTGAC	15	0.0159915	CTATGG	1	0.00537634	GCCAGG	4	0.000465062		TTCGTC	1	0.000194553	GGCATG	1	0.000152462	AGATGG	0	0	GCGACC	0	0		TTAGCT	13	0.0368272	TTATGC	2	0.00485437	CGGTGT	1	0.00222222	ACGCCC	0	0		TACTCC	3	0.000685401	GCTGCT	3	0.000824402	GTAAAC	0	0	ACAGAT	0
TCACTA	258	0.0769001	GAGGCG	15	0.0159915	ACTACC	1	0.00537634	AGTCCT	4	0.000465062		TTCGTG	1	0.000194553	TACGTC	1	0.000152462	GCCTTT	0	0	GTACAA	0	0		CAGCAC	13	0.0368272	ACTTTT	2	0.00485437	TAGTTT	1	0.00222222	AGTAGG	0	0		TAGGAC	3	0.000685401	TGTTTC	3	0.000824402	GATTCC	0	0	TACTCT	0
CTCGTT	258	0.0769001	TTATTT	15	0.0159915	CTCAGC	1	0.00537634	ATAGCG	4	0.000465062		TGTTTT	1	0.000194553	GGTAGG	1	0.000152462	GCCTTG	0	0	GCGAGT	0	0		GGACTT	13	0.0368272	GTACTT	2	0.00485437	TGTTTA	1	0.00222222	TGCTCG	0	0		CTTTCG	3	0.000685401	CCCTTG	3	0.000824402	TTCTCG	0	0	ACAGAC	0
TAGCAC	258	0.0769001	GAACAT	15	0.0159915	TAATCC	1	0.00537634	ATCGCT	4	0.000465062		AACATA	1	0.000194553	CTCCAT	1	0.000152462	GCCTTC	0	0	GCGAGG	0	0		TAGGAG	13	0.0368272	TTAGTG	2	0.00485437	TTCTAG	1	0.00222222	ATTTCG	0	0		CCAATG	3	0.000685401	CCGTGC	3	0.000824402	GTAAAA	0	0	TACTCC	0
GTACTA	258	0.0769001	AAGCAT	15	0.0159915	CTATCC	1	0.00537634	CACCCT	4	0.000465062		TTACCG	1	0.000194553	GGTCTC	1	0.000152462	GGTCAA	0	0	TCAGTA	0	0		GATCAC	13	0.0368272	CACATA	2	0.00485437	CCGGTC	1	0.00222222	GATAAG	0	0		CCCATC	3	0.000685401	TCACCG	3	0.000824402	GGTTTT	0	0	AGGCCG	0
GTCATT	258	0.0769001	TGCTTA	15	0.0159915	TAAGTG	1	0.00537634	ATCACG	4	0.000465062		TTACGG	1	0.000194553	TGTGAC	1	0.000152462	GCGAAT	0	0	TGATTA	0	0		TCCTCA	13	0.0368272	GTACTC	2	0.00485437	CGGCGG	1	0.00222222	TGCATA	0	0		TACGTA	3	0.000685401	GGCGCT	3	0.000824402	GATTCG	0	0	TACGTC	0
GGACAG	258	0.0769001	TTGATG	14	0.0149254	CTATAT	1	0.00537634	AGCTCT	4	0.000465062		TTAAAG	1	0.000194553	AACTCC	1	0.000152462	GCGAAG	0	0	GCTCTA	0	0		GTCCAT	12	0.0339943	TAGGAG	2	0.00485437	TGTTTT	1	0.00222222	CTAGTG	0	0		TCATAA	3	0.000685401	GTTCCA	3	0.000824402	AATAAG	0	0	TACGTA	0
CTACGC	258	0.0769001	CACCGG	14	0.0149254	TAATAC	1	0.00537634	TACTTG	4	0.000465062		TTAACC	1	0.000194553	GGTCGC	1	0.000152462	GCGAAC	0	0	GCCTTC	0	0		CTATCT	12	0.0339943	GGGTCT	2	0.00485437	CGGCAG	1	0.00222222	CCGGAG	0	0		CATTAG	3	0.000685401	GGTGTT	3	0.000824402	GTAACT	0	0	TACGGT	0
AGCAAT	258	0.0769001	TAAGCA	14	0.0149254	CGTTAC	1	0.00537634	ACGTTC	4	0.000465062		TTAAGG	1	0.000194553	GGTCGT	1	0.000152462	GCCCTT	0	0	AGGTTT	0	0		TCGAAG	12	0.0339943	GGTTAC	2	0.00485437	ACCGAT	1	0.00222222	TTACCA	0	0		CTTTCT	3	0.000685401	GGCTTG	3	0.000824402	GCGAAG	0	0	AGCACG	0
TGCGCA	257	0.0766021	AGGCGT	14	0.0149254	AGTGTG	1	0.00537634	ATGCGC	4	0.000465062		CGTTCC	1	0.000194553	CAAGGA	1	0.000152462	GCCTCT	0	0	GCCTGT	0	0		CGCCCA	12	0.0339943	CACCGG	2	0.00485437	CCACGT	1	0.00222222	GTTCGA	0	0		TACTGT	3	0.000685401	GTTCTC	3	0.000824402	TCCACG	0	0	ACAGCC	0
CTGGGG	257	0.0766021	CTTCTG	14	0.0149254	ACTCAT	1	0.00537634	AGTGGT	4	0.000465062		TTATAG	1	0.000194553	GGTTCG	1	0.000152462	GCCTCG	0	0	GGGCCA	0	0		CTCTCT	12	0.0339943	TTTAGT	2	0.00485437	GATCAT	1	0.00222222	ACGATC	0	0		CCAGAT	3	0.000685401	CCCCGC	3	0.000824402	GATGTA	0	0	CAGGGG	0
GTGTGA	257	0.0766021	CCCCTG	14	0.0149254	ACACAG	1	0.00537634	ATATGC	4	0.000465062		TTATCG	1	0.000194553	GGTTGC	1	0.000152462	GCCTCC	0	0	CCTTGA	0	0		TGTTTG	12	0.0339943	TCAATT	2	0.00485437	TTATCC	1	0.00222222	ACGGAA	0	0		AACGTA	3	0.000685401	ATCTTG	3	0.000824402	GATGTT	0	0	TACATC	0
CAGATT	257	0.0766021	GTACGG	14	0.0149254	CGTTCG	1	0.00537634	CACCCA	4	0.000465062		TTATTT	1	0.000194553	GATTGA	1	0.000152462	TTTATA	0	0	GGGAGC	0	0		CATGCA	12	0.0339943	CAGCGC	2	0.00485437	GATAGT	1	0.00222222	ACCAAG	0	0		TGATTA	3	0.000685401	GTGAAG	3	0.000824402	GATTAA	0	0	CCTATG	0
TGGGCT	257	0.0766021	TTATAC	14	0.0149254	TCGCAA	1	0.00537634	ATGCGA	4	0.000465062		GTTTCA	1	0.000194553	GGTGGC	1	0.000152462	GCCTGT	0	0	GCCTTT	0	0		TATTGT	12	0.0339943	GGCGCG	2	0.00485437	TAGGGT	1	0.00222222	GTTCAT	0	0		CCACAT	3	0.000685401	ATTTTG	3	0.000824402	TCGCCG	0	0	TACAGT	0
GTTCCC	257	0.0766021	CTCACG	14	0.0149254	TACCTC	1	0.00537634	ACCTCT	4	0.000465062		CACAAT	1	0.000194553	GGTTAG	1	0.000152462	GCCTGG	0	0	GCCCCG	0	0		CTGAAA	12	0.0339943	GGCTGA	2	0.00485437	CTCCCA	1	0.00222222	GTTTGA	0	0		TATTGT	3	0.000685401	GTCCTC	3	0.000824402	GTTTCG	0	0	TACCAA	0
CAGTGT	257	0.0766021	ATGGTG	14	0.0149254	CGTGCC	1	0.00537634	ACTTCC	4	0.000465062		TTAGGT	1	0.000194553	TATCTT	1	0.000152462	GCCTGC	0	0	GCCCCC	0	0		TCGTTA	12	0.0339943	AAGTTT	2	0.00485437	GATCCA	1	0.00222222	GTTCCA	0	0		TATCGA	3	0.000685401	GTGAGC	3	0.000824402	ACCGTG	0	0	GCTTTG	0
CAGCCG	256	0.076304	ATGGCT	14	0.0149254	TACGCT	1	0.00537634	ACGTCC	4	0.000465062		AACCTT	1	0.000194553	AATCCG	1	0.000152462	GCCATT	0	0	ATTAGC	0	0		CTCGTA	12	0.0339943	TGCGTA	2	0.00485437	TTATAT	1	0.00222222	CCCCAG	0	0		CCACGG	3	0.000685401	TAATTT	3	0.000824402	GTGAAG	0	0	AGTATC	0
TGTGAG	256	0.076304	ATGTCC	14	0.0149254	CGTGAT	1	0.00537634	ATAACC	4	0.000465062		TGAGCA	1	0.000194553	CACTGA	1	0.000152462	GCCATG	0	0	ACGTGA	0	0		TCCCGC	12	0.0339943	CTAACC	2	0.00485437	CCGGCG	1	0.00222222	GTTTAT	0	0		CCTGTG	3	0.000685401	AGTTGG	3	0.000824402	TACGGG	0	0	GCCTTC	0
TCCCGT	256	0.076304	TTGCGT	14	0.0149254	GATTCA	1	0.00537634	ATAGAT	4	0.000465062		AAGAGA	1	0.000194553	GGGCTG	1	0.000152462	GGAGGA	0	0	GCCCGG	0	0		ATGTTA	12	0.0339943	TCGTAG	2	0.00485437	TTATGC	1	0.00222222	AGGCAG	0	0		TGTTTG	3	0.000685401	TATCTC	3	0.000824402	GATTTC	0	0	CTGTTA	0
GTGAAT	256	0.076304	TACTGC	14	0.0149254	TAAACG	1	0.00537634	AGGCTG	4	0.000465062		TCTGTA	1	0.000194553	GGGGGG	1	0.000152462	CAAGAC	0	0	GCCCGC	0	0		CTCAAA	12	0.0339943	CGTTAC	2	0.00485437	TAAGCA	0	0	ACGATT	0	0		GGACGC	3	0.000685401	TATGAC	3	0.000824402	GATTTT	0	0	ACAGTC	0
TGCCCA	256	0.076304	GTTATA	14	0.0149254	TACGAT	1	0.00537634	GACTGA	4	0.000465062		TTTCGC	1	0.000194553	GGGATG	1	0.000152462	GCCCAT	0	0	TTACTG	0	0		TGTGTA	12	0.0339943	CCCCGT	2	0.00485437	CGGTAG	0	0	AGCCTG	0	0		CCTTCT	3	0.000685401	ACCTTG	3	0.000824402	GGTTCA	0	0	TACACA	0
CACTAT	256	0.076304	TCCCCC	13	0.0138593	CGCACA	1	0.00537634	AGGACC	4	0.000465062		TTTCTG	1	0.000194553	GGGCCG	1	0.000152462	GCCCAG	0	0	GCCCCT	0	0		CTCGTC	12	0.0339943	CTCATT	2	0.00485437	GTCCAT	0	0	CATAAC	0	0		GTGTTC	3	0.000685401	TATTAA	3	0.000824402	GGTTAT	0	0	TACAGC	0
GAGACC	255	0.076006	CTCCTC	13	0.0138593	CTCCTG	1	0.00537634	AGGGGC	4	0.000465062		GTTATA	1	0.000194553	GGGCCT	1	0.000152462	GCCCAC	0	0	GCCATG	0	0		GGGCCA	12	0.0339943	GGGGCG	2	0.00485437	ACACCT	0	0	GCTATA	0	0		CGTACT	3	0.000685401	TTCGAA	3	0.000824402	ACTAGG	0	0	CACGGG	0
TCCATA	254	0.0757079	AAGCAC	13	0.0138593	CTAACT	1	0.00537634	TAGAGA	4	0.000465062		TTTGTG	1	0.000194553	GGGGTC	1	0.000152462	AGCGAA	0	0	GCCATC	0	0		CTGCTG	12	0.0339943	GAGCGT	2	0.00485437	TAAGAT	0	0	CAGATA	0	0		CCTGGG	3	0.000685401	CACACC	3	0.000824402	GCTACG	0	0	TACACT	0
ACCCGC	254	0.0757079	TGTGTA	13	0.0138593	CTAACG	1	0.00537634	ACGTCT	4	0.000465062		TTTTGG	1	0.000194553	GGGTCG	1	0.000152462	GCCACT	0	0	TGCCAA	0	0		GTCCCT	12	0.0339943	ACTATC	2	0.00485437	CGTCCT	0	0	GTTTCC	0	0		AGAACA	3	0.000685401	GCCTTG	3	0.000824402	GATTCT	0	0	CCGGAA	0
CATGCG	254	0.0757079	TTCGTA	13	0.0138593	CGTTGT	1	0.00537634	GTAGTA	4	0.000465062		TTTTGT	1	0.000194553	GGGTTT	1	0.000152462	GCCACG	0	0	GCCAGT	0	0		GTACGT	12	0.0339943	GTGAGT	2	0.00485437	ACACAG	0	0	GTTCGT	0	0		CGAGTC	3	0.000685401	GCAATG	3	0.000824402	GGTTTA	0	0	CAACTG	0
GCCCTT	254	0.0757079	GTTGCA	13	0.0138593	CTGTTA	1	0.00537634	GGGGGA	4	0.000465062		TTTTTT	1	0.000194553	TGACGA	1	0.000152462	GCCACC	0	0	TCGCCA	0	0		ATAGCA	12	0.0339943	GGGCCA	2	0.00485437	GTCCCA	0	0	GCCTGG	0	0		ACCGCG	3	0.000685401	GTGATG	3	0.000824402	GATTGA	0	0	TACCGA	0
CTACGA	254	0.0757079	GTATGT	13	0.0138593	GCCGGG	1	0.00537634	CCTGTA	4	0.000465062		TCAAAT	1	0.000194553	GGGGTG	1	0.000152462	GTCCCT	0	0	GCCCAC	0	0		GTCGCT	12	0.0339943	CAGTGT	2	0.00485437	ACAGAA	0	0	GTCTTA	0	0		GTCTCT	3	0.000685401	ACCGGA	3	0.000824402	TCCTGG	0	0	TACCTC	0
GTCCAT	254	0.0757079	TTGCCG	13	0.0138593	CTAATC	1	0.00537634	TCGAGA	4	0.000465062		TTTTAC	1	0.000194553	GGGTAG	1	0.000152462	GCCAGT	0	0	AGCTAT	0	0		TCACAT	12	0.0339943	GGGCGG	2	0.00485437	TCAGGG	0	0	GTCTGT	0	0		CTGCTC	3	0.000685401	CACAAC	3	0.000824402	GGTTTC	0	0	ACCCCG	0
TGCCTA	254	0.0757079	CGACGC	13	0.0138593	TACAGT	1	0.00537634	TGTATA	4	0.000465062		TTTTAT	1	0.000194553	ACTCAC	1	0.000152462	GCCAGG	0	0	GCCATT	0	0		CTCGAT	12	0.0339943	TCCAAG	2	0.00485437	CAGTTA	0	0	ACTCAC	0	0		CCCCGT	3	0.000685401	CCCGAG	3	0.000824402	GGTTGT	0	0	TACCGT	0
ATCACC	254	0.0757079	CACCTC	13	0.0138593	CGTTGG	1	0.00537634	TATTTG	3	0.000348797		CAATCC	1	0.000194553	GCGCAG	1	0.000152462	GTTGCA	0	0	AGCATA	0	0		ATACTT	12	0.0339943	CCACGG	2	0.00485437	TTAGGT	0	0	GTCTTT	0	0		CGAAGC	3	0.000685401	TAGAGC	3	0.000824402	AGAAAG	0	0	ACAGGC	0
CCGCGC	254	0.0757079	TTAATA	13	0.0138593	GTGTGT	1	0.00537634	CCTCTC	3	0.000348797		TTGGGC	1	0.000194553	GCGCAT	1	0.000152462	GATGCT	0	0	GCCGCC	0	0		TGGGCC	12	0.0339943	TCACAC	2	0.00485437	GTCATG	0	0	TCGATG	0	0		GGACTG	3	0.000685401	CCAAGT	3	0.000824402	GGTTGA	0	0	ACAGGT	0
TGCATG	254	0.0757079	ATTGGC	13	0.0138593	TACCGG	1	0.00537634	TCACGC	3	0.000348797		TTGGTG	1	0.000194553	GCGCCG	1	0.000152462	GCCTGA	0	0	AACGTG	0	0		GTACCC	12	0.0339943	TTTGGG	2	0.00485437	TAAGGA	0	0	GTCTCT	0	0		CGACGG	3	0.000685401	ATCTAA	3	0.000824402	GATTGC	0	0	CCTACA	0
TTAAAG	254	0.0757079	TCCAGG	13	0.0138593	CGGCCC	1	0.00537634	ATAGCC	3	0.000348797		CACGTG	1	0.000194553	GCCTTC	1	0.000152462	GCCCTG	0	0	GCCGAT	0	0		GTCGTA	12	0.0339943	CTACGC	2	0.00485437	GTCATA	0	0	CGCGAT	0	0		GTTAAT	3	0.000685401	ATACCC	3	0.000824402	TCTCAC	0	0	CTGATG	0
TGCTGC	253	0.0754098	TGTTGG	13	0.0138593	ACGCGA	1	0.00537634	TGTCAG	3	0.000348797		AGCGGG	1	0.000194553	ACGCCA	1	0.000152462	GCCCTC	0	0	GCCGGG	0	0		TGTTGG	12	0.0339943	TGCCTC	2	0.00485437	TAAGGC	0	0	GTCTCC	0	0		ATCACA	3	0.000685401	TTCTAC	3	0.000824402	CAGTTG	0	0	GGTCAT	0
AGGAAT	253	0.0754098	GGCCCT	13	0.0138593	AAATTA	1	0.00537634	GTAACC	3	0.000348797		GCGGCG	1	0.000194553	GCGAGC	1	0.000152462	TAAACA	0	0	GCCGGC	0	0		TCGTGG	12	0.0339943	AGTACA	2	0.00485437	ACAGAC	0	0	CGATTT	0	0		CCGCTT	3	0.000685401	TACTCT	3	0.000824402	GATGAA	0	0	TACCCC	0
GTACGA	253	0.0754098	AGCCGC	13	0.0138593	CTCGCT	1	0.00537634	CTTAGA	3	0.000348797		GGCGCG	1	0.000194553	GCGGAT	1	0.000152462	GCCGAT	0	0	GTACGT	0	0		ATGTTC	12	0.0339943	CGTGCG	2	0.00485437	TGTAGG	0	0	AGACTG	0	0		GTTTCG	3	0.000685401	AAGTGG	3	0.000824402	GTACTA	0	0	GCCGAA	0
TTTGGA	253	0.0754098	GGCACA	13	0.0138593	CCTTGG	1	0.00537634	ATATTA	3	0.000348797		ATGCCT	1	0.000194553	GCGGTG	1	0.000152462	ACCGTA	0	0	GCCGCT	0	0		GCGCGT	12	0.0339943	CCTTAC	2	0.00485437	TAAGCC	0	0	ACCGTG	0	0		CCGGGG	3	0.000685401	TTGGGC	3	0.000824402	GATCTT	0	0	GATGTG	0
ATGATT	253	0.0754098	GTACGT	13	0.0138593	CCTTGC	1	0.00537634	AATCCC	3	0.000348797		TTTAAT	1	0.000194553	CGGCCA	1	0.000152462	GCCGAC	0	0	GCCCTG	0	0		TGATTT	11	0.0311615	CTAACA	2	0.00485437	ACCTAG	0	0	ATTTCC	0	0		CCCTTG	3	0.000685401	AATATC	3	0.000824402	AGCACG	0	0	ACACAA	0
TCCCTA	253	0.0754098	GTTTGA	13	0.0138593	TCCGCA	1	0.00537634	CTTTGA	3	0.000348797		ATAGGA	1	0.000194553	GCGTAG	1	0.000152462	AGACCG	0	0	GCCCTC	0	0		TTAAAT	11	0.0311615	CCTGGA	2	0.00485437	AGCCCG	0	0	ACTAGT	0	0		ATCCCA	3	0.000685401	CCGTCC	3	0.000824402	TCTACG	0	0	CTGTAG	0
TCTGCA	253	0.0754098	GCGCGG	13	0.0138593	TCACCG	1	0.00537634	CCTCGA	3	0.000348797		TTTCCC	1	0.000194553	TAACTC	1	0.000152462	GCCCCT	0	0	ATGTTA	0	0		GTGGGC	11	0.0311615	ACGCGG	2	0.00485437	GAACAG	0	0	ACTATA	0	0		CCGCCG	3	0.000685401	GCGCAT	3	0.000824402	GTAATT	0	0	GTCAGC	0
GCCCCG	253	0.0754098	CGCCCG	13	0.0138593	CTTGAC	1	0.00537634	CTCGTC	3	0.000348797		ATTCTT	1	0.000194553	GCGGGC	1	0.000152462	GCCCCG	0	0	GCCCGT	0	0		CTTGAA	11	0.0311615	AGACTG	2	0.00485437	TAAGCT	0	0	ACTAGA	0	0		CCGAGG	3	0.000685401	TACTCC	3	0.000824402	GATGAC	0	0	ACAATC	0
TACGTT	252	0.0751118	CGGCAG	13	0.0138593	CCTTTT	1	0.00537634	AGTGGC	3	0.000348797		TTGTTC	1	0.000194553	GCGGGT	1	0.000152462	GCCCCC	0	0	CGACAA	0	0		CACACT	11	0.0311615	TATTTT	2	0.00485437	ACATCA	0	0	ATAGTG	0	0		GTCTCC	3	0.000685401	CCCTTA	2	0.000549602	TGAGAG	0	0	CTCGGT	0
CTCTAT	252	0.0751118	TGATCT	13	0.0138593	GTAATG	1	0.00537634	CTGTGG	3	0.000348797		TTTAAC	1	0.000194553	GACGCC	1	0.000152462	CATTTA	0	0	GCCGAC	0	0		TGGGAG	11	0.0311615	CTCATC	2	0.00485437	TCTCCG	0	0	GTAGGA	0	0		CTGTCG	3	0.000685401	CTTGGA	2	0.000549602	GTAGCA	0	0	ACAATT	0
TAGATA	252	0.0751118	CCTTAT	13	0.0138593	TCAATC	1	0.00537634	CTATTA	3	0.000348797		TGATGG	1	0.000194553	GCCCAG	1	0.000152462	CTCGTA	0	0	ACTACT	0	0		CTGCGA	11	0.0311615	AAGATC	2	0.00485437	GTTATA	0	0	ACTATT	0	0		GTTTCA	3	0.000685401	CTACGG	2	0.000549602	GCATTG	0	0	ACACAC	0
ACCACG	252	0.0751118	GTATTC	13	0.0138593	CCTGTT	1	0.00537634	AATCTT	3	0.000348797		CGTCCT	1	0.000194553	GCCCCC	1	0.000152462	GCCCGG	0	0	GCCCTT	0	0		ATGATG	11	0.0311615	CTACTG	2	0.00485437	GTGTCT	0	0	CAACTG	0	0		CCTATT	3	0.000685401	CGGGTT	2	0.000549602	GATCGT	0	0	ACACAT	0
TACCCC	252	0.0751118	CGCACG	13	0.0138593	GGTCGT	1	0.00537634	CTGGGT	3	0.000348797		TGCCGT	1	0.000194553	GCCCCT	1	0.000152462	GCCCGC	0	0	TGGGCC	0	0		CTGCTT	11	0.0311615	ACTCCT	2	0.00485437	TGCTAA	0	0	ACTCAA	0	0		CCGTAT	3	0.000685401	GCGATT	2	0.000549602	GATCGA	0	0	ACACCA	0
TGATCT	252	0.0751118	TTTACA	13	0.0138593	CCTAAC	1	0.00537634	GAAAGG	3	0.000348797		CACCGA	1	0.000194553	GCATCG	1	0.000152462	GAAACC	0	0	GATTAC	0	0		GTTCTC	11	0.0311615	CTATAG	2	0.00485437	GTTATT	0	0	GATGAC	0	0		GTTTAT	3	0.000685401	GAACTC	2	0.000549602	ACAGTG	0	0	ACACCC	0
GGGCCT	252	0.0751118	CAGATA	12	0.0127932	TCACAG	1	0.00537634	CGCCGA	3	0.000348797		GCTACC	1	0.000194553	GCATTT	1	0.000152462	TGGCTT	0	0	TGGGAT	0	0		CGACGG	11	0.0311615	GGCCCT	2	0.00485437	ACACTT	0	0	GTTAAG	0	0		AATCGT	3	0.000685401	GTTTGC	2	0.000549602	GATCTA	0	0	GGGCCT	0
GGGTAT	252	0.0751118	CAGCCC	12	0.0127932	TCACAT	1	0.00537634	AGCTAC	3	0.000348797		CTGGTA	1	0.000194553	GCCATT	1	0.000152462	TGGCTG	0	0	TTTCGA	0	0		CGACGC	11	0.0311615	TGAGCG	2	0.00485437	TAACGT	0	0	CAATTG	0	0		TTTTTC	3	0.000685401	GTACAT	2	0.000549602	CGTTAG	0	0	TAGCCT	0
TCGTGA	252	0.0751118	TGCCGG	12	0.0127932	CCTTAG	1	0.00537634	TGGGTT	3	0.000348797		AGCATA	1	0.000194553	GATACA	1	0.000152462	TGGCTC	0	0	GGTGAA	0	0		GTCCAC	11	0.0311615	CCACAG	2	0.00485437	GAATTT	0	0	GTCGCC	0	0		GACGCG	3	0.000685401	CCCTTC	2	0.000549602	GTACTC	0	0	TCACTC	0
CAGGCA	251	0.0748137	TTAACC	12	0.0127932	GCGGGA	1	0.00537634	ACTTGG	3	0.000348797		GCTACA	1	0.000194553	GGTTTT	1	0.000152462	AACGAA	0	0	TCAGTT	0	0		TGGGAC	11	0.0311615	AGAATA	2	0.00485437	TTATAG	0	0	GTCGCA	0	0		AATGGA	3	0.000685401	CCCCCT	2	0.000549602	GATCTC	0	0	TAGGGC	0
GTACTG	251	0.0748137	TAAGTG	12	0.0127932	CGACAT	1	0.00537634	CCAACA	3	0.000348797		GTATTA	1	0.000194553	GCCGTC	1	0.000152462	TGGGAT	0	0	ACGGTA	0	0		ATTGAC	11	0.0311615	CGGACG	2	0.00485437	ACTATC	0	0	GTCGAT	0	0		GCCCCC	3	0.000685401	CATACA	2	0.000549602	GTAGAA	0	0	TAGGGA	0
GCCCTA	251	0.0748137	CTGATA	12	0.0127932	CGACAC	1	0.00537634	GAAAGC	3	0.000348797		TGCTTT	1	0.000194553	GCTTAC	1	0.000152462	GCGTTA	0	0	TGGCTG	0	0		GGGCGT	11	0.0311615	CGACTC	2	0.00485437	ATCTCG	0	0	GGGGAG	0	0		ATAGGG	3	0.000685401	GAACAC	2	0.000549602	GTAATA	0	0	TAGGCT	0
TAGGTC	251	0.0748137	TCTCAG	12	0.0127932	ACTCTA	1	0.00537634	TACTGT	3	0.000348797		GTAACG	1	0.000194553	GCCCTG	1	0.000152462	TGGGAC	0	0	TGGCTC	0	0		AATACA	11	0.0311615	CGCACA	2	0.00485437	ACAACT	0	0	GTCGCT	0	0		GCCAGC	3	0.000685401	CCGAAG	2	0.000549602	GATGCT	0	0	TAGGTA	0
TACATG	251	0.0748137	TTTTTG	12	0.0127932	TGCGCA	1	0.00537634	CTCGGC	3	0.000348797		GCCTAG	1	0.000194553	CGACTG	1	0.000152462	TTCCGA	0	0	CTCGTT	0	0		TACTAG	11	0.0311615	CCGGAT	2	0.00485437	TAACGC	0	0	CTAACT	0	0		TAAGGA	3	0.000685401	GCTGCA	2	0.000549602	GAACTT	0	0	TAGGGT	0
CTACGT	250	0.0745156	CGCCAC	12	0.0127932	CTTCAT	1	0.00537634	GGCTCG	3	0.000348797		TGCTCC	1	0.000194553	AGTGGA	1	0.000152462	TGGCCT	0	0	TGGCGT	0	0		CTATAA	11	0.0311615	CGCGAG	2	0.00485437	AGACTG	0	0	GTCCTT	0	0		CCGCGA	3	0.000685401	CTTAGC	2	0.000549602	GTAATC	0	0	CCAGAG	0
CACCCA	250	0.0745156	TGTTTG	12	0.0127932	TATTGC	1	0.00537634	CCTACA	3	0.000348797		TGCTCG	1	0.000194553	GCTCTG	1	0.000152462	TGGCCG	0	0	TGGGAG	0	0		TATTTA	11	0.0311615	AAAAAA	2	0.00485437	TAACGA	0	0	ACTCCA	0	0		CTGTTC	3	0.000685401	ACCACA	2	0.000549602	GTAAGT	0	0	CAGCGC	0
CACCCG	250	0.0745156	ATTCCA	12	0.0127932	GGTCTA	1	0.00537634	AAATCC	3	0.000348797		TCTTAC	1	0.000194553	GCTGTG	1	0.000152462	TGGCCC	0	0	ATTTTA	0	0		GGGCAA	11	0.0311615	TTCAGT	2	0.00485437	ACAGCT	0	0	AGGCTG	0	0		ATCAGT	3	0.000685401	CAGCTG	2	0.000549602	GATGGC	0	0	CATGCC	0
GTCTCT	249	0.0742176	TGGGAG	12	0.0127932	GTTGGA	1	0.00537634	TGGCTA	3	0.000348797		TCTTGG	1	0.000194553	AAAAGG	1	0.000152462	CATCAC	0	0	GTGTTG	0	0		CTTCTT	11	0.0311615	CGTAAC	2	0.00485437	GTCCGC	0	0	ACTCAT	0	0		TGCTCC	3	0.000685401	GAATTG	2	0.000549602	TGCTTG	0	0	TAGGAC	0
CATGCA	249	0.0742176	TAACGC	12	0.0127932	CGAACC	1	0.00537634	CCGGGA	3	0.000348797		TCTTTC	1	0.000194553	ACTATA	1	0.000152462	TGGCGT	0	0	TGGCTT	0	0		CGCGAG	11	0.0311615	CGTGAG	2	0.00485437	ACACGA	0	0	GAGGAG	0	0		GCCGCC	3	0.000685401	GAATTA	2	0.000549602	CCGTCG	0	0	ACCGGG	0
AACCAC	249	0.0742176	ATTCAG	12	0.0127932	CTTCTG	1	0.00537634	CCCTGC	3	0.000348797		TCTTTT	1	0.000194553	GCTCTT	1	0.000152462	TGGCGG	0	0	AAAGGA	0	0		TCCCTC	11	0.0311615	CGTGAA	2	0.00485437	GTTATC	0	0	GTCGAA	0	0		TGCTTC	3	0.000685401	GACACA	2	0.000549602	GATGGA	0	0	TAGGCC	0
GTCTAT	249	0.0742176	CTGAAT	12	0.0127932	TCAACT	1	0.00537634	ACGGTC	3	0.000348797		TCTTAG	1	0.000194553	TCCTGC	1	0.000152462	TTAGAA	0	0	TGGTCC	0	0		GCGCGA	11	0.0311615	TCACTC	2	0.00485437	TAAGAC	0	0	GTCTAC	0	0		TATATG	3	0.000685401	CGCTAT	2	0.000549602	TATTAG	0	0	ACAATA	0
AGACGA	249	0.0742176	TGTTGA	12	0.0127932	CTTCGC	1	0.00537634	ACGGGG	3	0.000348797		TCTTCT	1	0.000194553	AGTCTT	1	0.000152462	TATACC	0	0	AGGGAA	0	0		GCACAG	11	0.0311615	GGCCCA	2	0.00485437	CAGGAG	0	0	GTCTAA	0	0		AGTTCT	3	0.000685401	CGGGAG	2	0.000549602	GATGAT	0	0	TAGGAT	0
CGCCAG	249	0.0742176	ATACTG	12	0.0127932	GCCCCA	1	0.00537634	ACGGGT	3	0.000348797		TTAGTG	1	0.000194553	GCTTTT	1	0.000152462	TGGGTT	0	0	TGGTAT	0	0		CGGCAC	10	0.0283286	CGGCAC	2	0.00485437	GTCCGA	0	0	GATGTG	0	0		ACGGTC	3	0.000685401	CGGCTA	2	0.000549602	GTCCGG	0	0	CCGATC	0
CTTGTC	249	0.0742176	ACACAT	12	0.0127932	CATATA	1	0.00537634	TCTCAT	3	0.000348797		TGACAC	1	0.000194553	GGAAGG	1	0.000152462	TGGGTG	0	0	TGGTGG	0	0		CACCAG	10	0.0283286	CGTAAT	2	0.00485437	TAACTT	0	0	GCACTG	0	0		AGGGGA	3	0.000685401	CGGCGG	2	0.000549602	ACGATC	0	0	ACTTCG	0
GTATCA	249	0.0742176	CCCTCA	12	0.0127932	TCAAAT	1	0.00537634	ACCCAG	3	0.000348797		TGAGCT	1	0.000194553	TTGTCT	1	0.000152462	TGGGTC	0	0	TGGTGC	0	0		CTCCAC	10	0.0283286	GGCACT	2	0.00485437	GTCCTA	0	0	GTCTAT	0	0		TGTGGG	3	0.000685401	CGTATC	2	0.000549602	GTACCC	0	0	GGTTCG	0
TTCGTC	249	0.0742176	GCTTCA	12	0.0127932	GCAAGC	1	0.00537634	GTGGGT	3	0.000348797		TGAGTG	1	0.000194553	CCGCCG	1	0.000152462	TAAATG	0	0	TTGATG	0	0		TCGTTT	10	0.0283286	CACCGT	2	0.00485437	TAACTC	0	0	GAGCAG	0	0		TGTCGT	3	0.000685401	CTTCTT	2	0.000549602	GTACCA	0	0	ACACTC	0
TGATAT	248	0.0739195	TGCATG	11	0.0117271	GAAACC	1	0.00537634	AGTGTC	3	0.000348797		TGAGTT	1	0.000194553	CCAAGA	1	0.000152462	TGTCTG	0	0	TGGTCT	0	0		CGAGTG	10	0.0283286	ACTGTT	2	0.00485437	TAACTA	0	0	GTCGGT	0	0		AGCCTT	3	0.000685401	GGACTA	2	0.000549602	GATGCC	0	0	TTCCTG	0
CATGGC	248	0.0739195	TTCAGC	11	0.0117271	TACTCG	1	0.00537634	GCTGGT	3	0.000348797		TGACAT	1	0.000194553	GGAAAT	1	0.000152462	TGGTAG	0	0	TGGGTG	0	0		TCACAC	10	0.0283286	TCATGG	2	0.00485437	GTCCGT	0	0	GCAGGA	0	0		ATAAAT	3	0.000685401	CCTGGC	2	0.000549602	GTACAA	0	0	AATGTG	0
CAGTCA	248	0.0739195	GAGATT	11	0.0117271	TCATCC	1	0.00537634	ACGGTT	3	0.000348797		GGGTGA	1	0.000194553	GGAACC	1	0.000152462	ACTCGA	0	0	CCGAGA	0	0		CTCACG	10	0.0283286	TGATCA	2	0.00485437	TTAAGT	0	0	GTCGGC	0	0		GAGGAA	3	0.000685401	CCCCGT	2	0.000549602	GTACAT	0	0	TACTTT	0
TAACAC	248	0.0739195	CAGTAC	11	0.0117271	CCTACT	1	0.00537634	TGATCG	3	0.000348797		TGAGAG	1	0.000194553	AGTAGG	1	0.000152462	TATAGT	0	0	CCCCGC	0	0		TCGTCC	10	0.0283286	GACACG	2	0.00485437	CCTGCG	0	0	GCAGAA	0	0		TGGGTC	3	0.000685401	GTATTC	2	0.000549602	GCGTTC	0	0	TTTGTG	0
ATAACA	247	0.0736215	CAGATC	11	0.0117271	TCATCG	1	0.00537634	CGTATA	3	0.000348797		TGTAAT	1	0.000194553	AAAGGA	1	0.000152462	TGGGCT	0	0	TGGGGT	0	0		GTAGTT	10	0.0283286	TATTAG	2	0.00485437	TAATCA	0	0	GTCGTC	0	0		TGGGAC	3	0.000685401	CGGCCC	2	0.000549602	GGACCA	0	0	CCTTTA	0
GTCCCC	247	0.0736215	GCTGAC	11	0.0117271	GAGCTT	1	0.00537634	CTGGTT	3	0.000348797		TGTCGG	1	0.000194553	GACTGG	1	0.000152462	TGGGCG	0	0	TGGTAG	0	0		TACATG	10	0.0283286	CATGTT	2	0.00485437	GTATTC	0	0	GTCGTA	0	0		GGGTCA	3	0.000685401	CGGCCA	2	0.000549602	GGACAT	0	0	TACTGC	0
GGTGTA	247	0.0736215	ATGTGT	11	0.0117271	GTGAGC	1	0.00537634	GGCTGT	3	0.000348797		TGTCGT	1	0.000194553	CGGTTA	1	0.000152462	TGGGCC	0	0	TGGTAC	0	0		CACCCG	10	0.0283286	CAGCCG	2	0.00485437	AACCAC	0	0	CCATAG	0	0		TGTTTT	3	0.000685401	CGGATC	2	0.000549602	GGAATT	0	0	ACAGAA	0
ATTGGA	246	0.0733234	GTTAAT	11	0.0117271	TCCAGC	1	0.00537634	TATCTT	3	0.000348797		TGTCTC	1	0.000194553	TTCATA	1	0.000152462	AACAGG	0	0	GACTTG	0	0		GAGATC	10	0.0283286	TATTAC	2	0.00485437	CGCACA	0	0	ACGTAC	0	0		CTGTCA	3	0.000685401	CCTAAC	2	0.000549602	GCGATT	0	0	TACTTC	0
ACACGC	246	0.0733234	TATGTA	11	0.0117271	TCCATC	1	0.00537634	CGGGTC	3	0.000348797		TGTACT	1	0.000194553	GCGTCT	1	0.000152462	CTAAGA	0	0	TGGGTT	0	0		CTCCAG	10	0.0283286	TTCTGC	2	0.00485437	GTATTA	0	0	AGCGGC	0	0		CTGTGT	3	0.000685401	CCTACA	2	0.000549602	CGGACA	0	0	TACTTA	0
GCGAAC	246	0.0733234	CATCAT	11	0.0117271	AAGTCA	1	0.00537634	TCTAGC	3	0.000348797		TGTCAT	1	0.000194553	GCGTGG	1	0.000152462	GCATAA	0	0	TGGACG	0	0		ATTCAC	10	0.0283286	CTAGTT	2	0.00485437	TAATAT	0	0	ACGGTT	0	0		GTTCAA	3	0.000685401	CTCTCG	2	0.000549602	TTAGCG	0	0	CCATTG	0
TACCTC	246	0.0733234	CTGTGG	11	0.0117271	TCTGCA	1	0.00537634	GAGCGC	3	0.000348797		TGTCCT	1	0.000194553	TGCTTT	1	0.000152462	TGGGGC	0	0	TGGACC	0	0		GCAGCT	10	0.0283286	TGTGTT	2	0.00485437	CCTACG	0	0	GCAACG	0	0		ATGTCG	3	0.000685401	CGTCAG	2	0.000549602	GCGCGA	0	0	GAGACT	0
CCCCTG	246	0.0733234	TTGCAG	11	0.0117271	CCGTCT	1	0.00537634	CGCTCG	3	0.000348797		TGTGCC	1	0.000194553	GGGAGA	1	0.000152462	TAAGTA	0	0	ACGTAG	0	0		CTCCAT	10	0.0283286	TATCTG	2	0.00485437	GGTTTC	0	0	ACGTAA	0	0		CTGTGC	3	0.000685401	CGTATG	2	0.000549602	GGAACC	0	0	ACACGC	0
CTATCT	246	0.0733234	ATGGTC	11	0.0117271	GACCGT	1	0.00537634	ACGTCA	3	0.000348797		TGTTCG	1	0.000194553	GCTCCC	1	0.000152462	CTATCA	0	0	TGGAAT	0	0		CAGCGC	10	0.0283286	TATGCT	2	0.00485437	ACAGAT	0	0	GCTTAG	0	0		TGATCT	3	0.000685401	ACCGAC	2	0.000549602	TAAGAA	0	0	AGACGA	0
CATACT	245	0.0730253	TCCCTA	11	0.0117271	CCTCTG	1	0.00537634	CCAGAC	3	0.000348797		TATCTT	1	0.000194553	GCTCGT	1	0.000152462	ACTTGA	0	0	GACTCA	0	0		CTATGA	10	0.0283286	AATTCT	2	0.00485437	GTCAAA	0	0	CAGAAG	0	0		GGCATA	3	0.000685401	AACGTT	2	0.000549602	GGACAC	0	0	ACACCT	0
TACGCC	245	0.0730253	ACCTCC	11	0.0117271	ATCAGT	1	0.00537634	TACACT	3	0.000348797		TGTTGG	1	0.000194553	GCTACC	1	0.000152462	TGCTTC	0	0	TGGAGC	0	0		TGCGGA	10	0.0283286	TATGCC	2	0.00485437	GTCAGC	0	0	ACGTCC	0	0		ATGGTT	3	0.000685401	CCTCCG	2	0.000549602	GCGCCT	0	0	ACACGA	0
CTCTAG	245	0.0730253	GACCAG	11	0.0117271	TCAGCT	1	0.00537634	AGAGCG	3	0.000348797		TGTGGC	1	0.000194553	GCTACT	1	0.000152462	CCATTC	0	0	GACTAA	0	0		CGACGA	10	0.0283286	TCTCCG	2	0.00485437	GTATTT	0	0	ACGTAT	0	0		TCTTTG	3	0.000685401	CGTACA	2	0.000549602	GGGAAT	0	0	TACTAT	0
TCCCTG	245	0.0730253	TCCATT	11	0.0117271	TCATAG	1	0.00537634	ACGGGA	3	0.000348797		TGTGGT	1	0.000194553	CGCGGG	1	0.000152462	TGGAAT	0	0	TGGACT	0	0		TGTTGA	10	0.0283286	GAGCGG	2	0.00485437	TAATGG	0	0	GTGGGT	0	0		ATTAGC	3	0.000685401	CGGTTG	2	0.000549602	GCGCAT	0	0	TAGAGA	0
CCCCGG	245	0.0730253	GACCTC	11	0.0117271	GCGCAT	1	0.00537634	CGTGAT	3	0.000348797		AGATTA	1	0.000194553	GATTGC	1	0.000152462	CACCTA	0	0	TGCTTG	0	0		TCCAAA	10	0.0283286	TGTGAT	2	0.00485437	GTTAAT	0	0	ACGTCA	0	0		ATTAGG	3	0.000685401	CCTATC	2	0.000549602	CCGGTG	0	0	ACACTA	0
TTAGAC	245	0.0730253	TTGAAT	11	0.0117271	AGTGTA	1	0.00537634	CGTCTT	3	0.000348797		TGGATG	1	0.000194553	ATGAAC	1	0.000152462	TGGAAC	0	0	AACCGA	0	0		TCCCCG	10	0.0283286	ACGACT	2	0.00485437	TAATGA	0	0	GTGTTA	0	0		ATTAGT	3	0.000685401	CCTTAG	2	0.000549602	GAGAGG	0	0	TGAGAC	0
CTGTAT	244	0.0727273	CGCGAG	11	0.0117271	ACATCG	1	0.00537634	ATCCAC	3	0.000348797		TGGCTC	1	0.000194553	GTTTAT	1	0.000152462	TTCTCC	0	0	TGAGTG	0	0		CAGTCA	10	0.0283286	TTCATC	2	0.00485437	ACAATC	0	0	ACGGGC	0	0		CCTCCA	3	0.000685401	CCTTTT	2	0.000549602	GGACGT	0	0	TAGAGT	0
TGCAAC	244	0.0727273	ACGCAC	11	0.0117271	AGTAAG	1	0.00537634	AACATT	3	0.000348797		TGGCTT	1	0.000194553	TCACGA	1	0.000152462	TGCTCT	0	0	TGAGCG	0	0		CTGATA	10	0.0283286	TCAACC	2	0.00485437	ACCATG	0	0	TGTCCA	0	0		TCTTCT	3	0.000685401	CGGAAA	2	0.000549602	GCGCCA	0	0	ACACGT	0
ACGCCA	243	0.0724292	TTATCG	11	0.0117271	CATGGC	1	0.00537634	CCACGT	3	0.000348797		TGGGCC	1	0.000194553	GTTGAT	1	0.000152462	CGGGGA	0	0	TGGAAG	0	0		TCCCCT	10	0.0283286	TGCAGG	2	0.00485437	GAGATG	0	0	ACGGCT	0	0		ATTACT	3	0.000685401	TCAGCT	2	0.000549602	GCGCCC	0	0	CGAAAG	0
AGACAT	243	0.0724292	TTATCT	11	0.0117271	GAGCGA	1	0.00537634	GTGAAT	3	0.000348797		TGGCGG	1	0.000194553	GTTGGT	1	0.000152462	TGCTCC	0	0	TGGAAC	0	0		ATGTGT	10	0.0283286	GAGTTC	2	0.00485437	GTATCT	0	0	AGTAGC	0	0		TGCGAG	3	0.000685401	CGAGCG	2	0.000549602	GCGCAC	0	0	AGCAGC	0
GGACTC	243	0.0724292	ATGTGA	11	0.0117271	TATCGA	1	0.00537634	CCAGGC	3	0.000348797		TGGCGT	1	0.000194553	CACCGA	1	0.000152462	CTAGGC	0	0	AGCTAA	0	0		TGCACC	10	0.0283286	TTTAGC	2	0.00485437	CGCGGG	0	0	ACGGGA	0	0		GCCCTG	3	0.000685401	CCTTTG	2	0.000549602	AAGAAC	0	0	GTTTTA	0
TGATGC	242	0.0721311	GTTAAC	10	0.010661	CCTCCT	1	0.00537634	TAGATA	3	0.000348797		TCAAGT	1	0.000194553	CAATAG	1	0.000152462	TGCTGT	0	0	CGGCCA	0	0		AGTGAC	10	0.0283286	AAGCCA	2	0.00485437	GTATGA	0	0	GTATTA	0	0		GCCGAC	3	0.000685401	CTTTGC	2	0.000549602	CGCTTG	0	0	GTTTGT	0
GCTCCG	242	0.0721311	TGTGGC	10	0.010661	TCAGGT	1	0.00537634	TCGTGT	3	0.000348797		TGGGTC	1	0.000194553	TCACTA	1	0.000152462	TGCTGG	0	0	CGACCA	0	0		AAGCGG	10	0.0283286	GCTGCA	2	0.00485437	CTCCCG	0	0	ACGGTC	0	0		ATCCCT	3	0.000685401	GGCGAT	2	0.000549602	AATACG	0	0	TCCACC	0
TCCCGG	242	0.0721311	CGGCGT	10	0.010661	ATACCA	1	0.00537634	GATACC	3	0.000348797		CGGCTA	1	0.000194553	GATGGA	1	0.000152462	TGCTGC	0	0	TGGCCC	0	0		CATGAC	10	0.0283286	CTTCGA	2	0.00485437	GTATGT	0	0	CAAAAC	0	0		AGTCAT	3	0.000685401	CGCCCT	2	0.000549602	GGAAAC	0	0	GTTTTT	0
GGGCTT	242	0.0721311	TCGTGG	10	0.010661	ATAGTA	1	0.00537634	TCAGGC	3	0.000348797		GTCGCA	1	0.000194553	TAAAAT	1	0.000152462	GGCAAT	0	0	CCAATT	0	0		ATTACG	10	0.0283286	CTGTGA	2	0.00485437	CTACAG	0	0	GAATCG	0	0		TGCGCC	3	0.000685401	CGTGCG	2	0.000549602	AATCAG	0	0	CACGAA	0
TATAGC	242	0.0721311	CTCCTT	10	0.010661	CGTCAC	1	0.00537634	CGTGAG	3	0.000348797		TGGTTT	1	0.000194553	GGTCCA	1	0.000152462	AGATGA	0	0	TGGCAT	0	0		CTACGG	10	0.0283286	CAAGGT	2	0.00485437	TAATCC	0	0	GTATAG	0	0		TGCATC	3	0.000685401	ACCGTG	2	0.000549602	ATGCTA	0	0	GTTTTC	0
CTGAAG	242	0.0721311	GCGCGT	10	0.010661	GTTCCC	1	0.00537634	GGATAC	3	0.000348797		CGGTCA	1	0.000194553	GTTTGT	1	0.000152462	TGGATG	0	0	TGGCGG	0	0		CAGCAG	10	0.0283286	CTTGGG	2	0.00485437	ACAATA	0	0	ACGGTA	0	0		ATGAGG	3	0.000685401	CAACCT	2	0.000549602	GCGCTC	0	0	GTTTGC	0
GGTGCC	242	0.0721311	GCCGGC	10	0.010661	GTTCTA	1	0.00537634	TCTTTG	3	0.000348797		TGGTAG	1	0.000194553	GTTTTC	1	0.000152462	TGGATC	0	0	GCATAA	0	0		AGGCAT	10	0.0283286	AGGAGT	2	0.00485437	TCGTTT	0	0	ACGTTT	0	0		TGATTT	3	0.000685401	CGCGTC	2	0.000549602	GGAAAA	0	0	GTTTCC	0
GGGTCA	241	0.0718331	CCGCAC	10	0.010661	ACAGGC	1	0.00537634	GCGTGT	3	0.000348797		TGGTCC	1	0.000194553	GTAGTC	1	0.000152462	AGAGAT	0	0	ATCACT	0	0		ATTCCC	10	0.0283286	TGGGGC	2	0.00485437	ACACAT	0	0	CTCCAT	0	0		ATGATG	3	0.000685401	CCTGGG	2	0.000549602	GCTTTT	0	0	CACAAT	0
AGCCAT	241	0.0718331	ATACGT	10	0.010661	GTTCCG	1	0.00537634	GTTAGA	3	0.000348797		TGCCTA	1	0.000194553	CCGTGA	1	0.000152462	TGGCAT	0	0	TGGCCT	0	0		TGCAAC	10	0.0283286	CTGCCC	2	0.00485437	AACCAA	0	0	ACTAAA	0	0		ATCTTT	3	0.000685401	CGGACA	2	0.000549602	GGAAAT	0	0	CCGGGG	0
ATGAAC	241	0.0718331	CACCTG	10	0.010661	GAGGCG	1	0.00537634	TTAAGT	3	0.000348797		TGGGTA	1	0.000194553	GTTACT	1	0.000152462	TGGCAG	0	0	TGGATG	0	0		AGACTG	10	0.0283286	ACGCAC	2	0.00485437	GTCAGT	0	0	ACGTTA	0	0		ATGAAT	3	0.000685401	CGGAAC	2	0.000549602	CCGAGA	0	0	GTTTGA	0
CACACT	240	0.071535	CTTATT	10	0.010661	ACTCTT	1	0.00537634	AGCACC	3	0.000348797		GGAATG	1	0.000194553	CAACCT	1	0.000152462	TGGCAC	0	0	TGGATC	0	0		TGTAGA	10	0.0283286	CTCGAT	2	0.00485437	TAAGTC	0	0	GTCCTG	0	0		TGCAAG	3	0.000685401	CGCATA	2	0.000549602	ATCTCA	0	0	AGTATG	0
ATGAGT	240	0.071535	GGGCTA	10	0.010661	CGCGAC	1	0.00537634	CGTGCT	3	0.000348797		GCTTAC	1	0.000194553	GTGTGC	1	0.000152462	CTCAGG	0	0	ACGGCA	0	0		CCCAAA	10	0.0283286	ATTTCG	2	0.00485437	GTTAGA	0	0	ATCGCG	0	0		GAGGGG	3	0.000685401	CGCACG	2	0.000549602	TAACGA	0	0	GGTGTG	0
GGTCAT	240	0.071535	GCTACA	10	0.010661	ATCACA	1	0.00537634	AGCTGG	3	0.000348797		GCTTCC	1	0.000194553	GTGTGT	1	0.000152462	AACTGA	0	0	TGGAGT	0	0		CACATA	10	0.0283286	TGCATA	2	0.00485437	ACATCC	0	0	ACTAAT	0	0		CTGTTA	3	0.000685401	CGGCAT	2	0.000549602	GGAAGA	0	0	GAAGAT	0
TGACGA	240	0.071535	ATGGAG	10	0.010661	GTTATT	1	0.00537634	TTAATG	3	0.000348797		GCTTCT	1	0.000194553	GTTAAG	1	0.000152462	TGGACG	0	0	TGGCAG	0	0		GTTCGC	10	0.0283286	TGTAAG	2	0.00485437	GTTAGC	0	0	ACTACC	0	0		AAATTT	3	0.000685401	GTCGCG	2	0.000549602	GGAATC	0	0	TAAAGC	0
CTACAG	240	0.071535	GTAACA	10	0.010661	CGGTGA	1	0.00537634	CCAAGG	3	0.000348797		GGAATT	1	0.000194553	GTTAGG	1	0.000152462	TGGACC	0	0	TGGCAC	0	0		CGTACA	10	0.0283286	TGTTTC	2	0.00485437	ACACCA	0	0	ACTACT	0	0		TCCACG	3	0.000685401	AGATGC	2	0.000549602	GCGCGC	0	0	TAAAGA	0
TGGAAG	240	0.071535	TCGTTA	10	0.010661	CGCCGG	1	0.00537634	CCACGC	3	0.000348797		GGAGCG	1	0.000194553	GTTCGG	1	0.000152462	AGAGCA	0	0	CGGTCG	0	0		GGGAAA	10	0.0283286	CTCAAT	2	0.00485437	GTTAGT	0	0	ACTAAC	0	0		GTGATT	3	0.000685401	CCTTCG	2	0.000549602	AGTTAG	0	0	TAAATC	0
TCGTAC	240	0.071535	TCCCGT	10	0.010661	AATGCC	1	0.00537634	TTAACT	3	0.000348797		TTCACA	1	0.000194553	GTTCGT	1	0.000152462	TGGAGT	0	0	TGGATT	0	0		TCACAA	10	0.0283286	TCCTCA	2	0.00485437	CATTAC	0	0	CGAAGG	0	0		AATACA	3	0.000685401	CTCGTG	2	0.000549602	GGAACT	0	0	TAAATA	0
CTTAAG	240	0.071535	CGACCG	10	0.010661	CGCCCC	1	0.00537634	CGCACG	3	0.000348797		TGAATA	1	0.000194553	GTTCTG	1	0.000152462	TGGAGG	0	0	TGTGCG	0	0		ATGGTC	10	0.0283286	TGTCCG	2	0.00485437	CTAGGG	0	0	AATCGA	0	0		GTCCCA	3	0.000685401	CTCGGC	2	0.000549602	GCGCTA	0	0	TAAAGT	0
ATGTAG	240	0.071535	CTCCGT	10	0.010661	TATATG	1	0.00537634	GATTCT	3	0.000348797		ACTACC	1	0.000194553	GTTATG	1	0.000152462	TGGAGC	0	0	GCCCTA	0	0		TAACGT	10	0.0283286	TACTAA	2	0.00485437	TAAGGT	0	0	ACGTCT	0	0		GTATAA	3	0.000685401	TTAGCA	2	0.000549602	GCGCGT	0	0	TAAACT	0
TAGCGG	239	0.071237	CAACGT	10	0.010661	GTACGT	1	0.00537634	TCGTCT	3	0.000348797		GGAGAG	1	0.000194553	AACTTA	1	0.000152462	ATTCGC	0	0	AGGCAT	0	0		TACGCT	10	0.0283286	GTCGTC	2	0.00485437	CATTGG	0	0	ACATGT	0	0		ACCTTA	3	0.000685401	CGCGTT	2	0.000549602	CCTTTG	0	0	CCCTGC	0
TCTACG	239	0.071237	TTCTTA	10	0.010661	CAGCAG	1	0.00537634	ACGCCC	3	0.000348797		GGAGCC	1	0.000194553	GTTCCC	1	0.000152462	TGTCTC	0	0	TGTGAT	0	0		ATGTCC	10	0.0283286	GTTCCG	2	0.00485437	TATTAG	0	0	ACGTGA	0	0		CTACAT	3	0.000685401	CTCTTC	2	0.000549602	GGAAGC	0	0	TAAAAC	0
AGACAG	239	0.071237	GCAGCA	10	0.010661	CGCTAC	1	0.00537634	AATTTC	3	0.000348797		GACACA	1	0.000194553	CGACGG	1	0.000152462	AAGGAC	0	0	TGTGGG	0	0		GTACCT	10	0.0283286	TTAGGT	2	0.00485437	CAGTTG	0	0	GGGGGT	0	0		AGCCAG	3	0.000685401	CCGCTC	2	0.000549602	GGTAAG	0	0	TAAAAA	0
CTCCGG	239	0.071237	TGCCCC	10	0.010661	CGCGGG	1	0.00537634	ATGGAG	3	0.000348797		GTTTGA	1	0.000194553	TACGAG	1	0.000152462	TGTCGT	0	0	TGTGGC	0	0		AGGACC	10	0.0283286	TCCTCC	2	0.00485437	GTCAAT	0	0	GTGGCC	0	0		TTCGCG	3	0.000685401	CTATGC	2	0.000549602	GCGACT	0	0	GCGTGC	0
ATACAC	238	0.0709389	CCACAC	10	0.010661	CGCTGG	1	0.00537634	CCACAT	3	0.000348797		GCTCAC	1	0.000194553	TACGAT	1	0.000152462	TGTGAG	0	0	TTTGGA	0	0		CAGCAA	10	0.0283286	TGTCGG	2	0.00485437	TAATAA	0	0	GAAGAG	0	0		GGTACA	3	0.000685401	CTAAAC	2	0.000549602	GCGAGA	0	0	ACATCA	0
CGCTCA	238	0.0709389	GTCGCC	10	0.010661	ACTCTC	1	0.00537634	AAGGCC	3	0.000348797		GCTCAT	1	0.000194553	AGGTAT	1	0.000152462	TGTGAC	0	0	TGTGCT	0	0		TACGCC	10	0.0283286	TCCCAG	2	0.00485437	ACATCT	0	0	AGGTAG	0	0		ACTCGC	3	0.000685401	GAGCGT	2	0.000549602	GGATTA	0	0	TAAACA	0
CTTACA	238	0.0709389	TCCCTG	10	0.010661	ACGTAT	1	0.00537634	AGTACA	3	0.000348797		TGCACA	1	0.000194553	TACCGG	1	0.000152462	CTCCCT	0	0	CTCAAA	0	0		TGCTTT	9	0.0254958	GGCCGC	2	0.00485437	ATCATG	0	0	AGAGTG	0	0		CCGCGT	3	0.000685401	CTCCGG	2	0.000549602	GGATCA	0	0	GCACTG	0
GTTGCT	238	0.0709389	TACATG	10	0.010661	CACTGA	1	0.00537634	TGTGTC	3	0.000348797		AAGGCA	1	0.000194553	TACCTC	1	0.000152462	AATCCA	0	0	AAAGTA	0	0		GTACGG	9	0.0254958	TAACGC	2	0.00485437	CCAGCC	0	0	CATTCG	0	0		ACTCTT	3	0.000685401	CTCCAA	2	0.000549602	GACAAG	0	0	CGGCGG	0
GACAAT	238	0.0709389	ATGGCC	10	0.010661	CGCGGC	1	0.00537634	TGCGCG	3	0.000348797		GCTTTA	1	0.000194553	CTTGGA	1	0.000152462	TGTCCG	0	0	GCATGA	0	0		TTCAGG	9	0.0254958	GCTCAT	2	0.00485437	GTTAAA	0	0	TCTGAG	0	0		ACTATC	3	0.000685401	GCATTA	2	0.000549602	CAAGAA	0	0	GGAAGG	0
AGGTGC	238	0.0709389	GTCATT	10	0.010661	ACGTAG	1	0.00537634	TCAATG	3	0.000348797		GCTCCT	1	0.000194553	TACGCC	1	0.000152462	TGTCCC	0	0	TGTCGT	0	0		ATAGCC	9	0.0254958	TGTGTC	2	0.00485437	GTCACC	0	0	GACGGG	0	0		TTTTTA	3	0.000685401	ATTTCC	2	0.000549602	GCGATA	0	0	ACCAAA	0
GGCACA	237	0.0706408	CAGTCA	10	0.010661	TATAAT	1	0.00537634	GCTCCT	3	0.000348797		TTGGGA	1	0.000194553	TACTTT	1	0.000152462	GTTCTT	0	0	TGTGAG	0	0		CTCCGC	9	0.0254958	CCCACT	2	0.00485437	TAAATG	0	0	CGGAAT	0	0		ATAATA	3	0.000685401	CTGTGC	2	0.000549602	GGATAC	0	0	ACCAAC	0
CACCTA	237	0.0706408	TCTACT	10	0.010661	CCGCGA	1	0.00537634	CCAAGA	3	0.000348797		GGTACC	1	0.000194553	ATCTGG	1	0.000152462	TGTCAT	0	0	TGTGAC	0	0		GCTGAC	9	0.0254958	TACATC	2	0.00485437	GTCAGA	0	0	ACTGGT	0	0		AAAAGT	3	0.000685401	CTGTGA	2	0.000549602	GGATAA	0	0	GTGTTC	0
GTGGTA	237	0.0706408	AACTTT	10	0.010661	AATGGG	1	0.00537634	GCGCAG	3	0.000348797		TAGATT	1	0.000194553	TAGATC	1	0.000152462	TGTCGG	0	0	TTTACA	0	0		ATACCC	9	0.0254958	AGCCTT	2	0.00485437	GTTACT	0	0	ACCGAT	0	0		GTGAGT	3	0.000685401	CCGAGG	2	0.000549602	GGAGTT	0	0	ACCAAT	0
ATTACG	237	0.0706408	TATTTA	10	0.010661	CAGCTT	1	0.00537634	TCACGT	3	0.000348797		GCTCGG	1	0.000194553	TACTAT	1	0.000152462	TGTCGC	0	0	TGTCTT	0	0		CGCCCG	9	0.0254958	CCGAGT	2	0.00485437	GCTGTA	0	0	TTCGTG	0	0		CTAACG	3	0.000685401	CTGCGG	2	0.000549602	GGATGT	0	0	CTCACG	0
CAACAT	236	0.0703428	GTACGA	10	0.010661	CTTATC	1	0.00537634	GAGGGT	3	0.000348797		TATCGA	1	0.000194553	TACTCC	1	0.000152462	TCAATT	0	0	TGTTCG	0	0		ATGGCC	9	0.0254958	GTGAGC	2	0.00485437	CCATCG	0	0	CTTAAG	0	0		AGACTG	3	0.000685401	CTGCCC	2	0.000549602	GGATCT	0	0	ACCACA	0
CCCTCG	236	0.0703428	GCTTGT	10	0.010661	CGAGCC	1	0.00537634	ATTCTC	3	0.000348797		GCTGAC	1	0.000194553	TACTGT	1	0.000152462	TGTCCT	0	0	ATCTGA	0	0		CATGGC	9	0.0254958	AGGACC	2	0.00485437	TAAGTT	0	0	ACCGAC	0	0		CGCTCC	3	0.000685401	TCTAAT	2	0.000549602	GGGATT	0	0	GTTCGC	0
CGACAC	236	0.0703428	GAGCCG	10	0.010661	GTGTTG	1	0.00537634	GCTACA	3	0.000348797		CCGTCA	1	0.000194553	TAAACC	1	0.000152462	TGTGTG	0	0	CTAGGT	0	0		CAGATC	9	0.0254958	AGACCA	2	0.00485437	ACACTC	0	0	CGAGCG	0	0		ACTTGT	3	0.000685401	CTGCTT	2	0.000549602	TTCAAG	0	0	AGTCAC	0
GCGGCG	236	0.0703428	GGGGCA	9	0.00959488	CGACTC	1	0.00537634	GAGGGG	3	0.000348797		GACTCA	1	0.000194553	TATTTC	1	0.000152462	TGTGTC	0	0	TGTTAT	0	0		ATTGGC	9	0.0254958	TGTCTG	2	0.00485437	TAAAAC	0	0	TATCAG	0	0		GAGTGG	3	0.000685401	CTGCTG	2	0.000549602	GGATTC	0	0	GTTCTC	0
TGCGGC	236	0.0703428	TGCCGC	9	0.00959488	ACGGGC	1	0.00537634	GCTGTC	3	0.000348797		TCTCGC	1	0.000194553	TAACTG	1	0.000152462	CTTCAT	0	0	AAGCCA	0	0		TATGCG	9	0.0254958	TGTGAA	2	0.00485437	CTCAGT	0	0	ACCGGA	0	0		GCATTT	3	0.000685401	AGGCCT	2	0.000549602	TCCCGC	0	0	GTTCTA	0
TAACTA	235	0.0700447	AAAGCG	9	0.00959488	CGAGGC	1	0.00537634	TCTAAT	3	0.000348797		GGGAAC	1	0.000194553	GTCCCT	1	0.000152462	TGTGGT	0	0	TGTTGC	0	0		TATGCC	9	0.0254958	TACCGG	2	0.00485437	TAAAAT	0	0	TACTCC	0	0		TTACCT	3	0.000685401	CGTTTC	2	0.000549602	GGATCC	0	0	ACATGA	0
TTGTGA	235	0.0700447	ATTACG	9	0.00959488	CAGGTA	1	0.00537634	ATAATT	3	0.000348797		GGCTCT	1	0.000194553	TAAAGG	1	0.000152462	TGTTAG	0	0	TAAGGA	0	0		TACTTC	9	0.0254958	TGCAAT	2	0.00485437	GTCTGT	0	0	ACCGCC	0	0		AGGGTG	3	0.000685401	CGTTTA	2	0.000549602	GAACGT	0	0	CCTCTG	0
CATCAT	235	0.0700447	CGACTT	9	0.00959488	CGAGCT	1	0.00537634	CCCAGA	3	0.000348797		TAAAAC	1	0.000194553	ATAGGA	1	0.000152462	TGTTAC	0	0	TGTTCT	0	0		TATGCT	9	0.0254958	TCGAGG	2	0.00485437	GCTGGG	0	0	CCTAAT	0	0		GAGCTT	3	0.000685401	TCGGGT	2	0.000549602	GGATGC	0	0	ATGATG	0
GGCCAT	235	0.0700447	TACTAG	9	0.00959488	CGATTC	1	0.00537634	ACCATT	3	0.000348797		GGCTTC	1	0.000194553	TGTAGA	1	0.000152462	GCTTCG	0	0	ATTTAA	0	0		AAGCAC	9	0.0254958	AGCTTC	2	0.00485437	GGACAG	0	0	CACCGG	0	0		AGGCGC	3	0.000685401	CAGCGC	2	0.000549602	ATCCAG	0	0	CTTCTC	0
CTATAT	235	0.0700447	TCTGAT	9	0.00959488	AGGGCA	1	0.00537634	ACGCCT	3	0.000348797		ACTTGC	1	0.000194553	TAATGG	1	0.000152462	TGTGTT	0	0	TGTGTC	0	0		ACTACA	9	0.0254958	ATGGTG	2	0.00485437	GTTTTT	0	0	GTTTTA	0	0		TTACTT	3	0.000685401	CTAAAG	2	0.000549602	GGAGAT	0	0	TCGTGG	0
TCACGG	235	0.0700447	TACGTG	9	0.00959488	AATCGG	1	0.00537634	TGTTGG	3	0.000348797		GGGCAC	1	0.000194553	TACCAG	1	0.000152462	TGTGCG	0	0	ATAGTC	0	0		ATTACT	9	0.0254958	TACGCG	2	0.00485437	GGTACA	0	0	AGCTGG	0	0		TTTGGC	3	0.000685401	CGTGCA	2	0.000549602	GGACTT	0	0	GTTTAA	0
TCCCAC	235	0.0700447	GCACAC	9	0.00959488	CGAGAT	1	0.00537634	ACATAC	3	0.000348797		AAACCA	1	0.000194553	TACCCC	1	0.000152462	TGTGCC	0	0	TGTGGT	0	0		GGCGCG	9	0.0254958	TACTTG	2	0.00485437	TGAGAT	0	0	CAGGTT	0	0		GAGACC	3	0.000685401	ACTGCT	2	0.000549602	GGAGGT	0	0	ACATGT	0
CAACGT	235	0.0700447	AGTACC	9	0.00959488	GTGTTC	1	0.00537634	CATCGG	3	0.000348797		AAAGTC	1	0.000194553	TACCCT	1	0.000152462	ATCCCC	0	0	TGTTAG	0	0		CCCCAT	9	0.0254958	GTGAGG	2	0.00485437	ATTCTG	0	0	ACCCGT	0	0		CAAAGC	3	0.000685401	CGTCTG	2	0.000549602	GCGAGT	0	0	TTCTTG	0
TTTACT	235	0.0700447	CTCTCA	9	0.00959488	TATTAG	1	0.00537634	ATCCAT	3	0.000348797		GGGACC	1	0.000194553	AGAGGA	1	0.000152462	TGTGAT	0	0	TGTTAC	0	0		CTGAAC	9	0.0254958	CCCATT	2	0.00485437	GTCTTC	0	0	AATGAG	0	0		TCCGCC	3	0.000685401	ACTCAT	2	0.000549602	CGGGAG	0	0	ACATTT	0
TGAATT	235	0.0700447	TATGCC	9	0.00959488	CCCGTT	1	0.00537634	TGTTTC	3	0.000348797		GGGACG	1	0.000194553	AGGTGA	1	0.000152462	TTCTAA	0	0	CCATTA	0	0		ATGTCG	9	0.0254958	GTTCAA	2	0.00485437	GTTTAA	0	0	GGGGGA	0	0		ATAGCA	3	0.000685401	CGTTCC	2	0.000549602	GTCAGC	0	0	ACGTAT	0
GTCCTG	234	0.0697466	TGCGCG	9	0.00959488	TACCTA	1	0.00537634	CACTTA	3	0.000348797		GGGATG	1	0.000194553	CTATGT	1	0.000152462	TGTGGC	0	0	TGTGTT	0	0		GTCGCC	9	0.0254958	TGCAGC	2	0.00485437	GGTTGG	0	0	GACTGG	0	0		CAGTCG	3	0.000685401	CTGCTC	2	0.000549602	GCGATC	0	0	GCTTAG	0
GCGCTC	234	0.0697466	TACAGT	9	0.00959488	AATCTT	1	0.00537634	CCATTC	3	0.000348797		AGGTGA	1	0.000194553	TGTCGA	1	0.000152462	TAAGGA	0	0	TGTACG	0	0		AGGCGT	9	0.0254958	GCCCCA	2	0.00485437	TAAACT	0	0	TAAGAG	0	0		GGCGCG	3	0.000685401	GTTGGT	2	0.000549602	GTTACG	0	0	ACATTA	0
TTCGTG	234	0.0697466	ATCACC	9	0.00959488	CGCACG	1	0.00537634	AGAGTT	3	0.000348797		CAACCC	1	0.000194553	GTCAAG	1	0.000152462	TGTGCT	0	0	AAAAAA	0	0		TCTATT	9	0.0254958	GTTTCG	2	0.00485437	CCCTCG	0	0	ACCCTT	0	0		ATAGAT	3	0.000685401	AAAATT	2	0.000549602	GGAGAC	0	0	TTAACG	0
CTGAAC	234	0.0697466	GTGAGG	9	0.00959488	CGCACC	1	0.00537634	ATGCGT	3	0.000348797		GGCACG	1	0.000194553	GTCAAT	1	0.000152462	TGGTTG	0	0	TCCGGA	0	0		TTCGTT	9	0.0254958	ACTCGG	2	0.00485437	AATAGG	0	0	ACCGAA	0	0		GATGTA	3	0.000685401	CTATCC	2	0.000549602	GGAGAA	0	0	TACAAT	0
AGACCG	234	0.0697466	TCCACT	9	0.00959488	CGATTA	1	0.00537634	TACCCT	3	0.000348797		GGCAGT	1	0.000194553	GCATTG	1	0.000152462	TTTCGA	0	0	AAGTGA	0	0		TAAACA	9	0.0254958	TAAGCA	2	0.00485437	AGGATG	0	0	ACCCTA	0	0		AGCTCT	3	0.000685401	TTCTTT	2	0.000549602	TCATTA	0	0	CATCAT	0
GCCCGT	234	0.0697466	TAACGG	9	0.00959488	CTGTGC	1	0.00537634	CTGAGA	3	0.000348797		GGAGTG	1	0.000194553	AAGGCT	1	0.000152462	CGTCCC	0	0	TGTAGG	0	0		CGGCGA	9	0.0254958	ATGTCG	2	0.00485437	TAAAGA	0	0	TGGGTG	0	0		TTCAAT	3	0.000685401	AAGCAT	2	0.000549602	GGAGCT	0	0	TAATAC	0
TCACGA	233	0.0694486	AGCGTC	9	0.00959488	CGGATT	1	0.00537634	CCATCG	3	0.000348797		GGAGTT	1	0.000194553	GTATGT	1	0.000152462	ATTCTA	0	0	TGTAGC	0	0		GCTGTA	9	0.0254958	ATGTCC	2	0.00485437	CTCTTG	0	0	CTGGGC	0	0		GCAGCA	3	0.000685401	CTAATC	2	0.000549602	GGAGTC	0	0	TAATAA	0
TGGATT	233	0.0694486	TGATGA	9	0.00959488	CGATCT	1	0.00537634	GAGTTT	3	0.000348797		ATCTGG	1	0.000194553	TGGAAA	1	0.000152462	GATGTA	0	0	ACGTGT	0	0		TTCTTA	9	0.0254958	AGGATC	2	0.00485437	TCGAGG	0	0	TACTAC	0	0		AGCGTT	3	0.000685401	CTAAGG	2	0.000549602	GGAGTA	0	0	TAGGGG	0
GTCGTC	233	0.0694486	CGGATG	9	0.00959488	GGCCCA	1	0.00537634	GAGTTC	3	0.000348797		CCGTTA	1	0.000194553	GACAGA	1	0.000152462	TGTAAC	0	0	TGTACT	0	0		TCGTGA	9	0.0254958	GGTACT	2	0.00485437	CACCCC	0	0	TACTAA	0	0		AGCTAT	3	0.000685401	CTAAGA	2	0.000549602	GTTTGG	0	0	TAATCA	0
CAGATA	233	0.0694486	TTGCAT	9	0.00959488	TATGCT	1	0.00537634	ACAGTA	3	0.000348797		GGCGAT	1	0.000194553	TAGGTA	1	0.000152462	AAGCGT	0	0	TGGTTG	0	0		GCGCAA	9	0.0254958	ACGTAA	2	0.00485437	AGGGGG	0	0	TACGTT	0	0		GATTGA	3	0.000685401	CCGGCG	2	0.000549602	ACGCTT	0	0	TAATAT	0
CACCGC	233	0.0694486	GCAACC	9	0.00959488	CGAGTG	1	0.00537634	TAGTTC	3	0.000348797		AAATCC	1	0.000194553	GTCCAT	1	0.000152462	GAGAAA	0	0	TGGTTC	0	0		GTATGA	9	0.0254958	TTACGA	2	0.00485437	TAAACA	0	0	AGGTCG	0	0		GCACCT	3	0.000685401	CCGGGC	2	0.000549602	GGAGCC	0	0	TAAGTT	0
GGTGCT	232	0.0691505	CCCCCC	9	0.00959488	GTTATG	1	0.00537634	TGTGGA	3	0.000348797		GGCTAG	1	0.000194553	GTCACG	1	0.000152462	TGGTCG	0	0	TACCTT	0	0		CTTCTG	9	0.0254958	TAACTG	2	0.00485437	AGAGAA	0	0	TACTAT	0	0		ATGACC	3	0.000685401	CAGCTT	2	0.000549602	AACTTC	0	0	ATGTCG	0
CAGTCG	232	0.0691505	TTGCAC	9	0.00959488	CGCAAC	1	0.00537634	TAGTTG	3	0.000348797		CAAAGG	1	0.000194553	GTCACT	1	0.000152462	TGGTCC	0	0	TGGTGT	0	0		ACACAT	9	0.0254958	TCCCCT	2	0.00485437	GTCTGA	0	0	TGGGAG	0	0		TTAGCT	3	0.000685401	AAGGCA	2	0.000549602	ATGAAG	0	0	GCTATT	0
TCACCG	232	0.0691505	GTGGGC	9	0.00959488	CGATGC	1	0.00537634	GCTTTA	3	0.000348797		GCGTTA	1	0.000194553	GTCATC	1	0.000152462	TAGAGA	0	0	TGTAAG	0	0		GTATCA	9	0.0254958	TATGAA	2	0.00485437	GTCTGC	0	0	TACGGT	0	0		AGCTTT	3	0.000685401	TCGAAG	2	0.000549602	AGTAAG	0	0	TAAGGC	0
TACCGT	232	0.0691505	ACCACG	9	0.00959488	CGATTG	1	0.00537634	AAATGA	3	0.000348797		GGCGAC	1	0.000194553	GTAAGG	1	0.000152462	TGGTAT	0	0	TGTAAC	0	0		CTTGGG	9	0.0254958	GTAGTG	2	0.00485437	GGAGAA	0	0	CGGAGT	0	0		GTGCCG	3	0.000685401	TAAGCT	2	0.000549602	CAAATG	0	0	CCCACT	0
GAGTAT	232	0.0691505	AGGCGA	9	0.00959488	TGTGCG	1	0.00537634	TCTTGA	3	0.000348797		GCGATA	1	0.000194553	ACGGTA	1	0.000152462	TGGTGG	0	0	CCGAAG	0	0		CGGAAA	9	0.0254958	TGCCCC	2	0.00485437	AACGCT	0	0	CGATAT	0	0		TTATCG	3	0.000685401	TCCTTC	2	0.000549602	GCGTTT	0	0	ACCGCG	0
CTATGT	232	0.0691505	TTGATC	9	0.00959488	CGGGTA	1	0.00537634	CCTGCT	3	0.000348797		GTCCCC	1	0.000194553	GTACCG	1	0.000152462	TGGTGC	0	0	TGGTTT	0	0		TGAAAA	9	0.0254958	CCGATT	2	0.00485437	CACTGA	0	0	CTCAAA	0	0		GTGATA	3	0.000685401	TCTTCC	2	0.000549602	GCTCGA	0	0	TAAGTA	0
CTGGTA	232	0.0691505	TGCCTT	9	0.00959488	GGATGG	1	0.00537634	TGCAAC	3	0.000348797		GCCATG	1	0.000194553	GTACCT	1	0.000152462	CTACAT	0	0	TGTCCG	0	0		CACTAC	9	0.0254958	ATGTAA	2	0.00485437	AAAGAA	0	0	TACGTC	0	0		AAGACG	3	0.000685401	AGCCGT	2	0.000549602	GCTTGA	0	0	TAATTT	0
GCCCCC	231	0.0688525	CCACAT	9	0.00959488	GCATAG	1	0.00537634	GGACCA	3	0.000348797		GCCATT	1	0.000194553	ACTCAA	1	0.000152462	TGGTCT	0	0	ACTATA	0	0		TTCAGA	9	0.0254958	CTGCTG	2	0.00485437	ACAACA	0	0	TACGTA	0	0		TCGGGG	3	0.000685401	GCCCAT	2	0.000549602	GCTCTA	0	0	GGTCCC	0
TGCGTA	231	0.0688525	TTGCTA	9	0.00959488	GGAATT	1	0.00537634	TCCTCT	3	0.000348797		AGGTCA	1	0.000194553	GTAATT	1	0.000152462	TGTATG	0	0	AACCTT	0	0		CGGCGC	9	0.0254958	GTCACC	2	0.00485437	GTTCTT	0	0	ATTCAA	0	0		TCTGGG	3	0.000685401	AGTTTT	2	0.000549602	GTACAG	0	0	TAATTC	0
TAAGCA	231	0.0688525	TCACAT	9	0.00959488	GCATGC	1	0.00537634	AGGCGC	3	0.000348797		GCATGG	1	0.000194553	TACTGG	1	0.000152462	TGTATC	0	0	AGCCTA	0	0		CCACGG	9	0.0254958	TTACTG	2	0.00485437	GCTACG	0	0	CTATGG	0	0		ATGGCA	3	0.000685401	ATCTCT	2	0.000549602	GCTCCT	0	0	CAGTGG	0
ATTCAG	231	0.0688525	CTTGCA	9	0.00959488	GGGGCT	1	0.00537634	TGCAAG	3	0.000348797		TAACTA	1	0.000194553	ACGCCC	1	0.000152462	AGGGAA	0	0	TGTCGG	0	0		TTCTAG	9	0.0254958	TCCCTC	2	0.00485437	GTTTGC	0	0	TACTTC	0	0		TCTTAG	3	0.000685401	TCCGCC	2	0.000549602	GCTACT	0	0	TACAAC	0
ATAGTC	231	0.0688525	CCACAG	9	0.00959488	ATGGCT	1	0.00537634	CGCTTG	3	0.000348797		CGGCTG	1	0.000194553	GTAGAT	1	0.000152462	AAGTTA	0	0	TGTCGC	0	0		TAACAG	9	0.0254958	TTACGG	2	0.00485437	AAAGTT	0	0	CATCCG	0	0		TCTTAC	3	0.000685401	TCCCGG	2	0.000549602	GCTCGT	0	0	CTTCGG	0
CGCATG	231	0.0688525	ATGTAG	9	0.00959488	AGTTGT	1	0.00537634	CAATCT	3	0.000348797		GCCGCT	1	0.000194553	GTAGCG	1	0.000152462	TGTCAG	0	0	GGATCT	0	0		ACGCGC	9	0.0254958	CTCTCC	1	0.00242718	GTTTGA	0	0	AAACTG	0	0		CCTTTT	3	0.000685401	TCCCCG	2	0.000549602	GCTAAA	0	0	TAATTA	0
ATAGCA	231	0.0688525	TCGGCG	9	0.00959488	CGTGGA	1	0.00537634	TATCTA	3	0.000348797		GCCGGG	1	0.000194553	GTAGGG	1	0.000152462	CAGGAA	0	0	TGTCCT	0	0		TCACGT	9	0.0254958	TTAGAT	1	0.00242718	GTGAGT	0	0	CTCCTG	0	0		CAAAGG	3	0.000685401	TATTGG	2	0.000549602	GCTCGC	0	0	TAATGA	0
CTTATG	231	0.0688525	GTATTT	9	0.00959488	ATGGGG	1	0.00537634	AGTTTC	3	0.000348797		GCCGGT	1	0.000194553	TGAAGA	1	0.000152462	CAACTT	0	0	TGTATG	0	0		TGCCCC	9	0.0254958	ATCCCC	1	0.00242718	CTAGGC	0	0	ACCGGC	0	0		ATTTCT	3	0.000685401	TCCTAG	2	0.000549602	GCTGAC	0	0	TAATCT	0
CAGATC	230	0.0685544	GTCACT	9	0.00959488	GCATAC	1	0.00537634	GGCACA	3	0.000348797		GCCCAG	1	0.000194553	ATGTGA	1	0.000152462	TTACCA	0	0	TGTATC	0	0		TATGCA	9	0.0254958	TAAGTA	1	0.00242718	GTGAGC	0	0	GGATAG	0	0		CTGTGA	3	0.000685401	TCCTAA	2	0.000549602	GCGTTA	0	0	AGTCGG	0
GTAACG	230	0.0685544	GGTTTA	9	0.00959488	CGGTTA	1	0.00537634	CCTTAT	3	0.000348797		GCCCTG	1	0.000194553	GTAGAG	1	0.000152462	ATTACA	0	0	GGGAAG	0	0		TCACTG	9	0.0254958	CTGGGG	1	0.00242718	GCGGTG	0	0	AAGCAG	0	0		GTTTCC	3	0.000685401	TCCGTC	2	0.000549602	ATCAGG	0	0	TAATGT	0
CGCGGC	230	0.0685544	CGCGGC	9	0.00959488	TGTCTG	1	0.00537634	GACAGG	3	0.000348797		GCCGCC	1	0.000194553	GTCTGG	1	0.000152462	TGTACC	0	0	GCGGCA	0	0		CTGCTA	9	0.0254958	TTCGAT	1	0.00242718	GTCTTT	0	0	TCCTCG	0	0		ATAACA	3	0.000685401	GCATTC	2	0.000549602	GCTGAT	0	0	CACTCG	0
AGGCAT	230	0.0685544	GTCCAT	9	0.00959488	ATTCTT	1	0.00537634	CGGCTC	3	0.000348797		GAGCTC	1	0.000194553	CGCAGA	1	0.000152462	ATGTTA	0	0	TGTCAG	0	0		ATGAGA	9	0.0254958	ACATCT	1	0.00242718	CAAAGG	0	0	ACCGTA	0	0		TCTGAG	3	0.000685401	TAAGGA	2	0.000549602	GCGTGA	0	0	TAATGC	0
TGGAAC	230	0.0685544	ATTCTC	8	0.00852878	GCTAAT	1	0.00537634	TCTTAT	3	0.000348797		GCAATC	1	0.000194553	ACTAAC	1	0.000152462	TGTAAT	0	0	TGTCAC	0	0		GGTGCT	8	0.0226629	GCGTTG	1	0.00242718	CACACG	0	0	AGCACT	0	0		CGTGCA	3	0.000685401	TCTGCA	2	0.000549602	GCATGT	0	0	TAACGA	0
TCGGCG	230	0.0685544	CCCACT	8	0.00852878	CGCTTC	1	0.00537634	TGCTAT	3	0.000348797		GCAATG	1	0.000194553	GTGATG	1	0.000152462	TGTAGG	0	0	TATACG	0	0		TACGTG	8	0.0226629	CTCGGG	1	0.00242718	GTGAAC	0	0	TACTGC	0	0		CCGTTC	3	0.000685401	AAGCGC	2	0.000549602	AGAGGG	0	0	ACATAC	0
GTCACC	230	0.0685544	GCGTTC	8	0.00852878	AGATCC	1	0.00537634	CCTCGC	3	0.000348797		GCAATT	1	0.000194553	GTCTTG	1	0.000152462	TGTAGC	0	0	ACTCTA	0	0		GGACTA	8	0.0226629	CTGGGA	1	0.00242718	GATGGA	0	0	AGGGCC	0	0		GCAATG	2	0.000456934	GCCGCG	2	0.000549602	ACTCTG	0	0	GCTATA	0
CGGCAC	230	0.0685544	ACGAGA	8	0.00852878	GCATCT	1	0.00537634	GTACCC	3	0.000348797		GCAAAC	1	0.000194553	GTCTTT	1	0.000152462	CGAACA	0	0	TGAGCC	0	0		AGACCA	8	0.0226629	AAATCT	1	0.00242718	ACAAAT	0	0	GCCGTG	0	0		TATATA	2	0.000456934	CGGCGT	2	0.000549602	AACTAG	0	0	TAACGT	0
AACCCG	230	0.0685544	TCTCGG	8	0.00852878	GGGGGC	1	0.00537634	ACGTGA	3	0.000348797		GCAACG	1	0.000194553	TTAGGA	1	0.000152462	TGTACT	0	0	ACAAAA	0	0		TGTGAG	8	0.0226629	AAAGAG	1	0.00242718	GGGAAG	0	0	ACCACT	0	0		GTCGGC	2	0.000456934	GTAGTT	2	0.000549602	AGGTAG	0	0	GACGTC	0
TTCAGG	230	0.0685544	CGATCA	8	0.00852878	ATGTGC	1	0.00537634	CGGCTG	3	0.000348797		GCAACT	1	0.000194553	GTGCAG	1	0.000152462	TGACTT	0	0	TGAGAT	0	0		AAGCAA	8	0.0226629	TAACTA	1	0.00242718	GTCTCG	0	0	TATAAC	0	0		GTCGCT	2	0.000456934	TCGTTA	2	0.000549602	GCTAGA	0	0	TAACGC	0
ATTACC	230	0.0685544	GGGGGC	8	0.00852878	TGTCTT	1	0.00537634	TAGGTT	3	0.000348797		GCACAT	1	0.000194553	GTGAGG	1	0.000152462	TGACTG	0	0	TGAGGG	0	0		GGGATT	8	0.0226629	TGCTCT	1	0.00242718	GTGGCC	0	0	TATAAA	0	0		TAATCT	2	0.000456934	TCGGTC	2	0.000549602	GCTATA	0	0	TAACCC	0
GAGCTG	230	0.0685544	TGCTCA	8	0.00852878	ATGTCG	1	0.00537634	ACTCAC	3	0.000348797		AGTGAC	1	0.000194553	GTGTAG	1	0.000152462	TGACTC	0	0	TGAGGC	0	0		GCTTCA	8	0.0226629	TCTTCG	1	0.00242718	TCCAAG	0	0	ACCACC	0	0		GGCGAA	2	0.000456934	TCGGGG	2	0.000549602	ATGTTG	0	0	TAACAC	0
TGACCC	230	0.0685544	GCTCGG	8	0.00852878	TGTTTT	1	0.00537634	CCTGAT	3	0.000348797		CCATTA	1	0.000194553	GTGTCT	1	0.000152462	TGGCTA	0	0	CCGGGG	0	0		CTCCTT	8	0.0226629	AAAGGG	1	0.00242718	ACATAA	0	0	TAGTGA	0	0		GCGCGT	2	0.000456934	CACCAT	2	0.000549602	GCTACC	0	0	ACATAT	0
GCACCG	229	0.0682563	GCTGCC	8	0.00852878	AGAGAT	1	0.00537634	TGCGTG	3	0.000348797		GCAGTG	1	0.000194553	GTGCCT	1	0.000152462	TGAGAT	0	0	TGAGCT	0	0		AAGCAT	8	0.0226629	AAAGCG	1	0.00242718	GTTTAT	0	0	ACCAGC	0	0		TTATGG	2	0.000456934	TCTCTA	2	0.000549602	GGTTCC	0	0	TAAATT	0
TAGCCT	229	0.0682563	ATAGTA	8	0.00852878	GTTCTG	1	0.00537634	CCTGCC	3	0.000348797		GATACC	1	0.000194553	AGCACC	1	0.000152462	TGAGAG	0	0	CATGCA	0	0		GGGAAC	8	0.0226629	TATTGA	1	0.00242718	GGTATC	0	0	TAGGGC	0	0		AGCGAT	2	0.000456934	TCTCGA	2	0.000549602	GTCACC	0	0	GAAGGG	0
CAACAC	229	0.0682563	GTTTTG	8	0.00852878	ATGAGA	1	0.00537634	TGCGTT	3	0.000348797		GCACGT	1	0.000194553	GAGGGG	1	0.000152462	TGAGAC	0	0	TGACTC	0	0		ATTCCA	8	0.0226629	CTGATG	1	0.00242718	GTGGGA	0	0	ACCAGA	0	0		TGTGGT	2	0.000456934	TCTATG	2	0.000549602	CTCAAG	0	0	TAACAT	0
TCTCAG	229	0.0682563	TATTAG	8	0.00852878	GGAGTA	1	0.00537634	GGCAAC	3	0.000348797		GCACTC	1	0.000194553	TCATCC	1	0.000152462	TCCCCA	0	0	AATACG	0	0		CCCACG	8	0.0226629	CAGCAG	1	0.00242718	AATAAG	0	0	AGCATG	0	0		CTCATA	2	0.000456934	TGATAT	2	0.000549602	GCTATT	0	0	GTCTGG	0
TCACCC	229	0.0682563	CCCCGC	8	0.00852878	GCTCCA	1	0.00537634	TACGCT	3	0.000348797		GCGCGG	1	0.000194553	GTCCGT	1	0.000152462	TGACCT	0	0	TGACGT	0	0		TGCGTG	8	0.0226629	GACCTT	1	0.00242718	GTCGCA	0	0	TCATAG	0	0		GTCCTT	2	0.000456934	CGTCAC	2	0.000549602	GCTAGC	0	0	TAAGCC	0
CGACTC	228	0.0679583	CCTCGC	8	0.00852878	GCGCCA	1	0.00537634	CAATTA	3	0.000348797		GTGGAC	1	0.000194553	GTCCTC	1	0.000152462	TGACCG	0	0	GTGACA	0	0		CGGCAG	8	0.0226629	CGGTGT	1	0.00242718	GTCGCC	0	0	GAGTAG	0	0		TCGAGT	2	0.000456934	AATCAC	2	0.000549602	GCTAGT	0	0	TAAGCA	0
TCCTCT	228	0.0679583	GGCCCC	8	0.00852878	AGTCAG	1	0.00537634	TATTCC	3	0.000348797		GCGGGG	1	0.000194553	GTCGAC	1	0.000152462	TGACCC	0	0	TGAGAC	0	0		TGCATA	8	0.0226629	TGAGGT	1	0.00242718	CATGGT	0	0	TATAGT	0	0		CCCAGA	2	0.000456934	TACTTC	2	0.000549602	TAAGCG	0	0	TAAGAT	0
TGTCTG	228	0.0679583	GCACAT	8	0.00852878	AGCTGG	1	0.00537634	CTTCGC	3	0.000348797		GCGGTG	1	0.000194553	CCCACA	1	0.000152462	ACGCTC	0	0	CGAAAA	0	0		AACAAA	8	0.0226629	CTCTGG	1	0.00242718	GTCGAT	0	0	AGCAAC	0	0		GCACAT	2	0.000456934	TACTGC	2	0.000549602	GCTAAT	0	0	TAAGGA	0
GTATTT	228	0.0679583	CGATCT	8	0.00852878	GCCAGG	1	0.00537634	GTCATA	3	0.000348797		GCGCTG	1	0.000194553	CGAGGA	1	0.000152462	GAAATA	0	0	TGACTT	0	0		AAGCAG	8	0.0226629	GGGGAA	1	0.00242718	GCGATG	0	0	TATAGC	0	0		CGCACT	2	0.000456934	TCATCC	2	0.000549602	TCCAAA	0	0	GCTTGG	0
TCAACA	228	0.0679583	TCATCT	8	0.00852878	AACACG	1	0.00537634	CGAGCC	3	0.000348797		GCGCTT	1	0.000194553	GTCCGG	1	0.000152462	TGACGG	0	0	TGATCG	0	0		GTGAGT	8	0.0226629	TGGGTC	1	0.00242718	TAACAT	0	0	ATACTG	0	0		CTGCCC	2	0.000456934	ATTTGT	2	0.000549602	GCTAAC	0	0	ACAGTT	0
GCGCTT	228	0.0679583	TGTAGT	8	0.00852878	GTAAGA	1	0.00537634	GAAGCC	3	0.000348797		GCGGAT	1	0.000194553	GTCGAG	1	0.000152462	TGACGC	0	0	TGATCC	0	0		CTACGT	8	0.0226629	TAAACG	1	0.00242718	ATACGC	0	0	TATATC	0	0		TTAGTG	2	0.000456934	GCCGGT	2	0.000549602	GCTCCC	0	0	ACGCAG	0
ACCCTA	228	0.0679583	GATCCA	8	0.00852878	ATGCTT	1	0.00537634	ATCTCT	3	0.000348797		CGTCCG	1	0.000194553	TTGGGT	1	0.000152462	TCATCC	0	0	TGTCTG	0	0		CGCAGG	8	0.0226629	ACCCTA	1	0.00242718	ACTCTC	0	0	ACCAAA	0	0		TTAGCG	2	0.000456934	ACAGTT	2	0.000549602	GCTACA	0	0	ATCAAA	0
GCTTCA	227	0.0676602	AGACCT	8	0.00852878	TGTGTC	1	0.00537634	AGGGTT	3	0.000348797		GCGTCG	1	0.000194553	GTCTCC	1	0.000152462	ATTTAA	0	0	TGATAT	0	0		GAGTAT	8	0.0226629	CGGGCG	1	0.00242718	AACCCT	0	0	ACCAAT	0	0		CCGTGA	2	0.000456934	GTAACT	2	0.000549602	GCTCAA	0	0	ACATAA	0
TAACTC	227	0.0676602	TCCAAG	8	0.00852878	ATTGGA	1	0.00537634	TGAAAG	3	0.000348797		GCGTGT	1	0.000194553	GACCGA	1	0.000152462	CAGTGA	0	0	TGATGG	0	0		GGGTCA	8	0.0226629	AGTCCT	1	0.00242718	GTTGGA	0	0	ACCACA	0	0		GGGAGG	2	0.000456934	TCTGAT	2	0.000549602	GCTCAT	0	0	TAACTA	0
AGCATT	227	0.0676602	CAGCTA	8	0.00852878	GGGGCC	1	0.00537634	CGGAGC	3	0.000348797		AACACA	1	0.000194553	GTCGCT	1	0.000152462	TGAGTC	0	0	TGATGC	0	0		TCCCCC	8	0.0226629	GGGAGG	1	0.00242718	CGTGGG	0	0	TATAAT	0	0		CACTGC	2	0.000456934	TCCTTG	2	0.000549602	AGTCAA	0	0	CCCAAG	0
CGTCCA	227	0.0676602	TGCTTT	8	0.00852878	AAACTG	1	0.00537634	ACTACC	3	0.000348797		GCGTAT	1	0.000194553	CCCATA	1	0.000152462	TAACTA	0	0	CACCCA	0	0		ATGGAG	8	0.0226629	TATTTC	1	0.00242718	CCCTAG	0	0	CGGTTG	0	0		TGTGAT	2	0.000456934	GCTGGG	2	0.000549602	TAATGG	0	0	TAAGAA	0
CACATC	227	0.0676602	GTCGCT	8	0.00852878	AACTAC	1	0.00537634	GGTAGA	3	0.000348797		GCCGGC	1	0.000194553	TATTGA	1	0.000152462	AAGGCA	0	0	ACGCCA	0	0		GCCCCA	8	0.0226629	CTGCGA	1	0.00242718	GCTGGC	0	0	ACCAAC	0	0		CTGCTG	2	0.000456934	TACCGA	2	0.000549602	GCGGCC	0	0	CTGGGG	0
TGCATC	227	0.0676602	CGACGT	8	0.00852878	TCTCTC	1	0.00537634	GTCCTG	3	0.000348797		GCGTCC	1	0.000194553	AGACGG	1	0.000152462	TGATAG	0	0	GACTGA	0	0		GTATAT	8	0.0226629	GAATGC	1	0.00242718	ACAAGC	0	0	GTTTGC	0	0		GCCGAA	2	0.000456934	TGGGGC	2	0.000549602	GCTTAT	0	0	GGAATA	0
TAGAAG	227	0.0676602	CTCCTA	8	0.00852878	ATGCTG	1	0.00537634	ATGATA	3	0.000348797		GCCGTC	1	0.000194553	AACGTC	1	0.000152462	TGATAC	0	0	TGAGTC	0	0		TAACCA	8	0.0226629	TATGGG	1	0.00242718	GTTCAA	0	0	GAACGG	0	0		CATTGT	2	0.000456934	GCTGAT	2	0.000549602	GCGGCT	0	0	GGAAGT	0
TGCGAT	227	0.0676602	CCCCCG	8	0.00852878	ATGCTC	1	0.00537634	AGAAAG	3	0.000348797		AAAAGT	1	0.000194553	TGATGA	1	0.000152462	TAGAGC	0	0	GAGATC	0	0		TCCGCA	8	0.0226629	GAAATG	1	0.00242718	GTTCAC	0	0	TGCGTC	0	0		GTTAAA	2	0.000456934	CTTTTA	2	0.000549602	GAGATC	0	0	AGTATA	0
CTCCCC	227	0.0676602	AACCTG	8	0.00852878	GGGGAT	1	0.00537634	GGCCCT	3	0.000348797		TCCCCA	1	0.000194553	CACCAG	1	0.000152462	CTCCTA	0	0	TGAGGT	0	0		GTACTA	8	0.0226629	GTTTGG	1	0.00242718	TAACCC	0	0	CACACC	0	0		CGATGT	2	0.000456934	TCAGTG	2	0.000549602	GAAATG	0	0	AGAGAG	0
CCCTCA	227	0.0676602	CTGATT	8	0.00852878	CATCCA	1	0.00537634	TGCAGG	3	0.000348797		GCGAGC	1	0.000194553	ACAGAT	1	0.000152462	TGAGCG	0	0	TGATAG	0	0		CAGCAT	8	0.0226629	GCGGCT	1	0.00242718	GTCCTT	0	0	TAGGGA	0	0		TCGTTC	2	0.000456934	CCTGTG	2	0.000549602	GCTTCC	0	0	GCGGAA	0
GTAGCT	227	0.0676602	ACGTTA	8	0.00852878	AGGGCG	1	0.00537634	GAAGAT	3	0.000348797		TGCGGA	1	0.000194553	GGTGGA	1	0.000152462	TGAGCC	0	0	TGATAC	0	0		TGTGTG	8	0.0226629	ACACAT	1	0.00242718	ACACAC	0	0	TAGGCT	0	0		AACCAC	2	0.000456934	TCAGAA	2	0.000549602	GCTTAA	0	0	GGAATC	0
GATCAC	226	0.0673621	CGTACT	8	0.00852878	AGGCGT	1	0.00537634	GGCACC	3	0.000348797		GCCTCG	1	0.000194553	ACAGAC	1	0.000152462	AGAGGC	0	0	GCGCGG	0	0		TTATCC	8	0.0226629	GAACGC	1	0.00242718	ACAGGC	0	0	AATCTA	0	0		TGAAAA	2	0.000456934	TCCCCC	2	0.000549602	GCGTAC	0	0	GGAACC	0
CAGCCA	226	0.0673621	GCGGCA	8	0.00852878	TTAGGC	1	0.00537634	CGACGT	3	0.000348797		CCCAGA	1	0.000194553	CTTCCA	1	0.000152462	TGAGGT	0	0	TGAGTT	0	0		AGTGCG	8	0.0226629	CGCGAT	1	0.00242718	ACTCAC	0	0	CAATGT	0	0		GTCGGT	2	0.000456934	TCCCCA	2	0.000549602	GAAATA	0	0	GGAACA	0
AATGCA	226	0.0673621	TGAACT	8	0.00852878	GGAGGT	1	0.00537634	TGCCTT	3	0.000348797		GCATAG	1	0.000194553	AGACGC	1	0.000152462	TGAGGG	0	0	TGAACG	0	0		AAGCCA	8	0.0226629	AATTAA	1	0.00242718	GTCGAC	0	0	CCCCGG	0	0		AGCTGA	2	0.000456934	GTCAAT	2	0.000549602	GCTTAC	0	0	GGAAAT	0
CTTCGG	226	0.0673621	TTCGTT	8	0.00852878	AGGGGG	1	0.00537634	TCAAAC	3	0.000348797		GCGCAT	1	0.000194553	CAAAAC	1	0.000152462	TGAGGC	0	0	TGAACC	0	0		TACTTA	8	0.0226629	GACACC	1	0.00242718	GTTCAT	0	0	ACCCCC	0	0		CTTAGT	2	0.000456934	TCCACG	2	0.000549602	ACAAGG	0	0	GGAAGC	0
CAGCTA	226	0.0673621	TGCTCT	8	0.00852878	GCTAGG	1	0.00537634	AATGCG	3	0.000348797		GCTGAT	1	0.000194553	AATAAC	1	0.000152462	TGACAT	0	0	GGGTCT	0	0		GCCTAC	8	0.0226629	CACGTG	1	0.00242718	AAAACG	0	0	TAGGAC	0	0		GTCGTG	2	0.000456934	TATGAG	2	0.000549602	GCGGAC	0	0	GGAAGA	0
CAACTA	226	0.0673621	ACGCGA	8	0.00852878	GCTTCA	1	0.00537634	TGCCTG	3	0.000348797		GCGCCT	1	0.000194553	AACGGG	1	0.000152462	TCTTTT	0	0	TGAAAT	0	0		TGCGCG	8	0.0226629	AAATAC	1	0.00242718	GTCGAA	0	0	TAGGAA	0	0		GCGTGG	2	0.000456934	TATGAA	2	0.000549602	AGGTGG	0	0	GGAACT	0
TCCCTC	226	0.0673621	GTTCTT	8	0.00852878	ACCCTT	1	0.00537634	GTCCCT	3	0.000348797		GCGATC	1	0.000194553	ATGAGC	1	0.000152462	TCTTTG	0	0	TGAAGG	0	0		TAGGTC	8	0.0226629	GTTAAT	1	0.00242718	ATTACG	0	0	ACCCAT	0	0		GATTTC	2	0.000456934	TATCGG	2	0.000549602	CAATCG	0	0	GGACTC	0
CTCATT	225	0.0670641	TTCGAT	8	0.00852878	TGAAGA	1	0.00537634	TATAAG	3	0.000348797		GCGATG	1	0.000194553	ATCTTT	1	0.000152462	TCTTTC	0	0	CGTCCA	0	0		TTAAAC	8	0.0226629	AGCTCT	1	0.00242718	GTGTAT	0	0	TCGGAC	0	0		ATTTTC	2	0.000456934	AAGTCG	2	0.000549602	GCTTTA	0	0	GGACGC	0
GCGGCA	225	0.0670641	GCAACA	8	0.00852878	GTCGTA	1	0.00537634	TGCATG	3	0.000348797		GCGATT	1	0.000194553	ATCCGA	1	0.000152462	AGTGCC	0	0	ATCGAC	0	0		ACGCGG	8	0.0226629	GACCGA	1	0.00242718	GTCGTA	0	0	CCCGCT	0	0		TCGAGA	2	0.000456934	TCACGG	2	0.000549602	TCATGG	0	0	CTTCCG	0
TGTACA	225	0.0670641	ACGCAT	8	0.00852878	GTATGA	1	0.00537634	AAAAGT	3	0.000348797		GTAATA	1	0.000194553	AGGCGG	1	0.000152462	TGAAAT	0	0	TGAACT	0	0		TCCTAC	8	0.0226629	TGCAAC	1	0.00242718	GTTCGA	0	0	ACCATT	0	0		AAAATA	2	0.000456934	TCACAC	2	0.000549602	GCGGCA	0	0	ACGGTG	0
AGGCTA	225	0.0670641	GTCTAT	8	0.00852878	AAAGGG	1	0.00537634	AAATTA	3	0.000348797		GTTAAC	1	0.000194553	TAAGGG	1	0.000152462	TGAAAG	0	0	ACGCTA	0	0		GTCCGC	8	0.0226629	GACCAG	1	0.00242718	ACGATG	0	0	ACCCAA	0	0		GTATGC	2	0.000456934	AGTCAT	2	0.000549602	GCTTCT	0	0	GGACTA	0
ACGTAT	225	0.0670641	CACGCA	8	0.00852878	GCACGG	1	0.00537634	ATCTGC	3	0.000348797		GTTAAT	1	0.000194553	ATACCC	1	0.000152462	TGAAAC	0	0	TCTTTC	0	0		TGATAC	8	0.0226629	CACACG	1	0.00242718	ACAGTA	0	0	GGCATG	0	0		AACAGT	2	0.000456934	TATTTA	2	0.000549602	TAGAGG	0	0	GGACGT	0
CTTGCC	225	0.0670641	CCCTGC	8	0.00852878	AGGCGC	1	0.00537634	GGTTTT	3	0.000348797		GTTACT	1	0.000194553	CCAATA	1	0.000152462	GAATCG	0	0	TGTGCC	0	0		TTCGAT	8	0.0226629	TCTAAA	1	0.00242718	GTCGTC	0	0	ACCATC	0	0		AGCTCC	2	0.000456934	GAACCG	2	0.000549602	GCTTGC	0	0	TGAAGG	0
GGCACG	225	0.0670641	GTCGGA	8	0.00852878	GCACGT	1	0.00537634	GTGCAA	3	0.000348797		ACTTGA	1	0.000194553	AGTCTC	1	0.000152462	TCTTCT	0	0	TAGGCG	0	0		TGCCGA	8	0.0226629	GACCCC	1	0.00242718	CAGTTC	0	0	ACAATC	0	0		AACAGG	2	0.000456934	ATTCAT	2	0.000549602	GCTGAG	0	0	GGACAT	0
AATACA	224	0.066766	CTTAAT	8	0.00852878	GGAGGG	1	0.00537634	GCTGCC	3	0.000348797		GTGTCG	1	0.000194553	GGACTA	1	0.000152462	AGTGAA	0	0	TGAAAG	0	0		CTATAT	8	0.0226629	ACCATT	1	0.00242718	GTCGTT	0	0	TAGGTA	0	0		AGGGCA	2	0.000456934	CACCCG	2	0.000549602	GCTGGA	0	0	CTACGG	0
CGGGCA	224	0.066766	TGTCTG	8	0.00852878	AAGAGC	1	0.00537634	GTCGTG	3	0.000348797		GTGTGG	1	0.000194553	AGGGCG	1	0.000152462	TCTTCC	0	0	TGAAAC	0	0		AATGCA	8	0.0226629	GGAATT	1	0.00242718	TAAAGC	0	0	TAGGGT	0	0		TCGAGC	2	0.000456934	GGTAGG	2	0.000549602	GCGTCC	0	0	CCATGG	0
GTAACC	224	0.066766	TGCGTT	8	0.00852878	ATATGA	1	0.00537634	AAGAGC	3	0.000348797		TTTGAC	1	0.000194553	GTTATT	1	0.000152462	GGTAAG	0	0	GTCACG	0	0		CTATGT	8	0.0226629	GACAAC	1	0.00242718	GTCTAT	0	0	CTTAGA	0	0		CGGCTG	2	0.000456934	TTTGGC	2	0.000549602	GCGGGC	0	0	GACAGG	0
TCACAC	224	0.066766	ATACGA	8	0.00852878	GCATTG	1	0.00537634	CGAACC	3	0.000348797		GTTCCC	1	0.000194553	CACAAG	1	0.000152462	TCTTGT	0	0	TCTTTT	0	0		CTGCCT	8	0.0226629	GTAGGT	1	0.00242718	GTCTCA	0	0	TAGGTT	0	0		CAGAGC	2	0.000456934	GGAATT	2	0.000549602	CCCATG	0	0	ACGTCC	0
GGTACT	224	0.066766	TGCCGT	8	0.00852878	CATTTA	1	0.00537634	GATTAT	3	0.000348797		GTTCGC	1	0.000194553	AGGGAC	1	0.000152462	CAACTA	0	0	TGACCG	0	0		TACTGC	8	0.0226629	GCCCTT	1	0.00242718	ACAGTC	0	0	TGGGAA	0	0		GTAGGT	2	0.000456934	CCAACA	2	0.000549602	GCGTAA	0	0	TTCGCG	0
GTACCG	224	0.066766	GGGCTG	8	0.00852878	AGAATC	1	0.00537634	AATGGC	3	0.000348797		GTTCGG	1	0.000194553	ACGCAC	1	0.000152462	TCTTGC	0	0	CTGGAA	0	0		TCCACT	8	0.0226629	TGCCAC	1	0.00242718	GTCTAC	0	0	TAGGTC	0	0		AACACG	2	0.000456934	GCCTAT	2	0.000549602	GTCGCT	0	0	GCTTCC	0
CCTCGC	224	0.066766	CTCCGC	8	0.00852878	CAATGA	1	0.00537634	AAATGC	3	0.000348797		GTTATC	1	0.000194553	ACGCAG	1	0.000152462	ATAGTC	0	0	GTTCTA	0	0		CGTCGT	8	0.0226629	GAACAT	1	0.00242718	ACACTA	0	0	AAACCA	0	0		TCAGGT	2	0.000456934	CTAGCT	2	0.000549602	GCGTCT	0	0	GCTTAC	0
TCGCCG	223	0.066468	CGCCGT	7	0.00746269	TCAATA	1	0.00537634	ACTCCT	3	0.000348797		GTTCAC	1	0.000194553	AACTTT	1	0.000152462	TGAATT	0	0	TGACAT	0	0		ACGACT	8	0.0226629	ATCCGA	1	0.00242718	ACATAT	0	0	ACGACC	0	0		GCGGAG	2	0.000456934	TTCAGC	2	0.000549602	GGATAT	0	0	GCTTAA	0
CTACTG	223	0.066468	TACTTG	7	0.00746269	AAGCGC	1	0.00537634	AAATGG	3	0.000348797		CGCATC	1	0.000194553	ACTGCG	1	0.000152462	TGAATG	0	0	TGACGG	0	0		ACCACA	8	0.0226629	CTTATA	1	0.00242718	TAAATC	0	0	TAAGCA	0	0		CGCTGC	2	0.000456934	TATGCT	2	0.000549602	GCTGCT	0	0	GCTGTT	0
GCGCCG	223	0.066468	AGTCGC	7	0.00746269	TGTATC	1	0.00537634	TGCTGC	3	0.000348797		ATGTTA	1	0.000194553	CACCAT	1	0.000152462	TGAATC	0	0	TGACGC	0	0		GGACTC	7	0.01983	ATTTAA	1	0.00242718	GTCGGC	0	0	ACGAAT	0	0		AACACT	2	0.000456934	TTATCA	2	0.000549602	GCGTCA	0	0	GCTTCA	0
CGTGTA	223	0.066468	GGCGAG	7	0.00746269	ATTATC	1	0.00537634	GACTCG	3	0.000348797		GTCTAT	1	0.000194553	AGTCCA	1	0.000152462	AAGCGA	0	0	TTTGCA	0	0		TCGAGC	7	0.01983	TATTCC	1	0.00242718	ACACAA	0	0	TAAGGA	0	0		TCGAAC	2	0.000456934	TTCGTC	2	0.000549602	GTCTAT	0	0	GCGCCG	0
CAGACG	223	0.066468	TCTTTT	7	0.00746269	GCGCTA	1	0.00537634	GAAGAC	3	0.000348797		ACGCGG	1	0.000194553	ACACGC	1	0.000152462	GGTAAA	0	0	TGACCT	0	0		CTTATG	7	0.01983	CCGGCT	1	0.00242718	ACAGGT	0	0	TAATTG	0	0		GCAACC	2	0.000456934	GACATA	2	0.000549602	AACCCC	0	0	GTTGGT	0
ATTCTC	222	0.0661699	CCTCCT	7	0.00746269	AGGTCT	1	0.00537634	GACTGC	3	0.000348797		GTCTGG	1	0.000194553	ATCGGC	1	0.000152462	TGACAG	0	0	TGAATG	0	0		TGCCTG	7	0.01983	TGCTGG	1	0.00242718	GACAGG	0	0	TAAGAA	0	0		GTCCAC	2	0.000456934	TTCCGG	2	0.000549602	GCTGTT	0	0	GCTGGT	0
TGTGGG	222	0.0661699	ATACCG	7	0.00746269	TGTCCG	1	0.00537634	ATGATT	3	0.000348797		TCTGCA	1	0.000194553	TTCTGA	1	0.000152462	TGACAC	0	0	TGAATC	0	0		TTTTTG	7	0.01983	CTTACC	1	0.00242718	TAAAGT	0	0	TAACTT	0	0		GTCATG	2	0.000456934	ACGATT	2	0.000549602	TAGGAG	0	0	ACGTGT	0
GTTATC	222	0.0661699	GTTCGT	7	0.00746269	TGTCAG	1	0.00537634	CCAGGA	3	0.000348797		ACGCCA	1	0.000194553	TGCTGC	1	0.000152462	TCTGTC	0	0	CACGCC	0	0		GATGCC	7	0.01983	TCTGGC	1	0.00242718	GTCGGA	0	0	TAACAC	0	0		TCGTGT	2	0.000456934	AAAATA	2	0.000549602	GCTGTC	0	0	GCTGGC	0
AAGCCA	222	0.0661699	GGCGCC	7	0.00746269	CGTCGG	1	0.00537634	GTGATA	3	0.000348797		GTCGTC	1	0.000194553	AGTCGT	1	0.000152462	CTACAA	0	0	CAATTA	0	0		CGTGCT	7	0.01983	GGTTTT	1	0.00242718	ACAACC	0	0	TAAGAT	0	0		AATTAG	2	0.000456934	AAAATC	2	0.000549602	GCGGTA	0	0	TCTTCG	0
TCCTAC	222	0.0661699	GGGACC	7	0.00746269	GCAGTG	1	0.00537634	CCGGGT	3	0.000348797		GTCTGT	1	0.000194553	ATGCAC	1	0.000152462	TGAACG	0	0	CGCTTA	0	0		ATCACA	7	0.01983	TCTTAC	1	0.00242718	GCCCGG	0	0	CAACAT	0	0		GAGCCG	2	0.000456934	CTACCC	2	0.000549602	GCGGTC	0	0	GCTGTC	0
AGTACG	222	0.0661699	GACCGC	7	0.00746269	GGGTCG	1	0.00537634	AATTAC	3	0.000348797		CCTGGA	1	0.000194553	AGGGCC	1	0.000152462	TGAACC	0	0	GTGCGA	0	0		AGCACG	7	0.01983	TGCTTG	1	0.00242718	ACAATT	0	0	TAAGAC	0	0		ATTTCA	2	0.000456934	ACGCGT	2	0.000549602	GCTGTA	0	0	GCTGTA	0
GATGCA	221	0.0658718	CGTATA	7	0.00746269	TGTAGC	1	0.00537634	CGGGTG	3	0.000348797		GTGGTT	1	0.000194553	ATGTCT	1	0.000152462	ACGGGG	0	0	AAGACT	0	0		TCTCCT	7	0.01983	CCCCAG	1	0.00242718	ACAAGA	0	0	TACCTA	0	0		GCGAAT	2	0.000456934	TTTTGG	2	0.000549602	GCGGGT	0	0	ATAGCC	0
CCACGT	221	0.0658718	TGATTT	7	0.00746269	ATTCGC	1	0.00537634	TATCTC	3	0.000348797		GTGTAG	1	0.000194553	ACACTG	1	0.000152462	TGAAGT	0	0	TGAATT	0	0		ACCCCA	7	0.01983	TCCAGC	1	0.00242718	GTCGGT	0	0	TAATAT	0	0		GCAAGG	2	0.000456934	CTTCTG	2	0.000549602	GCTGGT	0	0	ACGTGA	0
AAGATC	221	0.0658718	CTCTCC	7	0.00746269	GGAGTT	1	0.00537634	CCGGCT	3	0.000348797		TGTGGA	1	0.000194553	AGACAG	1	0.000152462	TGAAGG	0	0	TTGGGA	0	0		CCCCCT	7	0.01983	GGATGC	1	0.00242718	AACACT	0	0	GCCTAG	0	0		TCCTTG	2	0.000456934	TTTGGG	2	0.000549602	GTTCGT	0	0	GCTTTC	0
TGATTT	221	0.0658718	TTAGGT	7	0.00746269	AACTTT	1	0.00537634	CGGAAC	3	0.000348797		TATTTC	1	0.000194553	ACCTCA	1	0.000152462	TGAAGC	0	0	TGCGCC	0	0		CACCAC	7	0.01983	ACGAGC	1	0.00242718	GCAACG	0	0	GAAAAG	0	0		AGCTGG	2	0.000456934	GCGTTT	2	0.000549602	GGGAGT	0	0	GCTTTA	0
TCTTCA	220	0.0655738	GCGCGA	7	0.00746269	GTCCCG	1	0.00537634	ACTCCC	3	0.000348797		CGATCA	1	0.000194553	TAATTG	1	0.000152462	TGCCTT	0	0	TCTCGT	0	0		TTAGCG	7	0.01983	CTTTAG	1	0.00242718	GCTCGG	0	0	CCAAGC	0	0		TTATAA	2	0.000456934	TATATG	2	0.000549602	GATATT	0	0	GGAAAC	0
AAGACA	220	0.0655738	TTATTA	7	0.00746269	GGCGCA	1	0.00537634	TGAGGT	3	0.000348797		TAAATT	1	0.000194553	CTATGA	1	0.000152462	GGCGAA	0	0	TGCGAT	0	0		ATACTG	7	0.01983	GCATCG	1	0.00242718	GGAATC	0	0	TAATCC	0	0		CTTTTA	2	0.000456934	GCTCAT	2	0.000549602	GCCATA	0	0	GGAAAA	0
GTACAG	220	0.0655738	ACGTAT	7	0.00746269	TTGGGT	1	0.00537634	GTCCCA	3	0.000348797		TAACGC	1	0.000194553	AGAGTC	1	0.000152462	TGCCTC	0	0	TGCGGG	0	0		CACATG	7	0.01983	CCCGCT	1	0.00242718	GGAATA	0	0	CACGTG	0	0		CGCGAT	2	0.000456934	GCGTAA	2	0.000549602	GCCATC	0	0	GCTTTT	0
GTGACG	220	0.0655738	TATGTT	7	0.00746269	GGGTCC	1	0.00537634	GCTATT	3	0.000348797		TAACGT	1	0.000194553	CGACGA	1	0.000152462	ACGAAT	0	0	TGCGGC	0	0		GGCAAC	7	0.01983	GACCGT	1	0.00242718	GAACTG	0	0	TAAGTC	0	0		CGCCTT	2	0.000456934	AAACAC	2	0.000549602	GCAGCT	0	0	GCTTGA	0
GCTCAT	220	0.0655738	AATCTA	7	0.00746269	AGATCG	1	0.00537634	GTCTGG	3	0.000348797		TAAGAC	1	0.000194553	GCCAGA	1	0.000152462	CCCTCA	0	0	GACCGG	0	0		GGTGTA	7	0.01983	ACCTGA	1	0.00242718	ACCCAC	0	0	TAAGTA	0	0		CCCACG	2	0.000456934	ACAATT	2	0.000549602	AACAGG	0	0	GCTTCT	0
GCGCCC	220	0.0655738	GTATAT	7	0.00746269	ATTCAC	1	0.00537634	CCGCAC	3	0.000348797		TAACCC	1	0.000194553	CACGAG	1	0.000152462	TGCGAG	0	0	TGCGCT	0	0		CCACAC	7	0.01983	GTTTGC	1	0.00242718	AGCTGG	0	0	TAAGGT	0	0		ATGTTG	2	0.000456934	CCCTAG	2	0.000549602	TGATCG	0	0	ACGTGC	0
GCAACA	220	0.0655738	ATGTCT	7	0.00746269	ATCACG	1	0.00537634	GAAAGT	3	0.000348797		TAACCG	1	0.000194553	AGCAGA	1	0.000152462	TGCGAC	0	0	TGCCTG	0	0		TCCCTT	7	0.01983	ACCTTT	1	0.00242718	GGAAGA	0	0	TAATAA	0	0		CTGATC	2	0.000456934	TTTAGG	2	0.000549602	GGGATC	0	0	GCTTGT	0
CGTACA	220	0.0655738	CGAAGG	7	0.00746269	TTCGGC	1	0.00537634	AGGCCC	3	0.000348797		TAACCT	1	0.000194553	TTAATT	1	0.000152462	TACACA	0	0	TGCCTC	0	0		ATTTAA	7	0.01983	TCTGCA	1	0.00242718	AATCTA	0	0	TAAGTT	0	0		CGAGGT	2	0.000456934	TGCTTG	2	0.000549602	ACATAG	0	0	TAAGCT	0
GTAGAG	220	0.0655738	CACGCG	7	0.00746269	TTATCT	1	0.00537634	GAGACC	3	0.000348797		TAAGCT	1	0.000194553	AATAGT	1	0.000152462	TGCCCT	0	0	GAGGTT	0	0		CGACTA	7	0.01983	GTTTTA	1	0.00242718	GGAACC	0	0	AGATAA	0	0		GTGTGT	2	0.000456934	TGCTCG	2	0.000549602	GCCACT	0	0	GCTTGC	0
ACCGCA	220	0.0655738	CAAGCA	7	0.00746269	ATTAAG	1	0.00537634	TGGGCT	3	0.000348797		TAATTG	1	0.000194553	ACAACA	1	0.000152462	TGCCCG	0	0	TGCCGT	0	0		GTCCCA	7	0.01983	TCTGCC	1	0.00242718	CGCTCG	0	0	TAAATC	0	0		CTGGTG	2	0.000456934	TGCCGC	2	0.000549602	GGGCCA	0	0	ACGGTA	0
ATACGC	220	0.0655738	CAAACG	7	0.00746269	ATAACC	1	0.00537634	CGCTCT	3	0.000348797		TACAAC	1	0.000194553	ATGGTA	1	0.000152462	TGCCCC	0	0	TGCGAG	0	0		CATTAC	7	0.01983	CTTCAG	1	0.00242718	CCTCTT	0	0	TAAATA	0	0		GTGTTG	2	0.000456934	TGCAGG	2	0.000549602	GCCACC	0	0	TCGCGG	0
TGATTA	219	0.0652757	TAGGTC	7	0.00746269	GGCTTC	1	0.00537634	AGCGTA	3	0.000348797		ACCCTG	1	0.000194553	ATGTGT	1	0.000152462	TAATGT	0	0	TGCGAC	0	0		CACCAT	7	0.01983	CTTCTG	1	0.00242718	GGAAGC	0	0	TAAAGT	0	0		GTGTAG	2	0.000456934	TTAATG	2	0.000549602	GGGCGA	0	0	ACGGTC	0
GGCCGC	219	0.0652757	CGCACT	7	0.00746269	CCTGTA	1	0.00537634	TATCTG	3	0.000348797		TCATAG	1	0.000194553	AACATG	1	0.000152462	TCGCAA	0	0	TTTCAT	0	0		GGTTTT	7	0.01983	CGAAGA	1	0.00242718	GGACTC	0	0	CGATAG	0	0		GACTTT	2	0.000456934	CACCTA	2	0.000549602	GGTGGG	0	0	AATTCT	0
CAGCGA	219	0.0652757	TATGTC	7	0.00746269	ACCTCT	1	0.00537634	CGCTGC	3	0.000348797		CGCACA	1	0.000194553	AGAGTT	1	0.000152462	GCCTAA	0	0	TTCCGA	0	0		ATTTAT	7	0.01983	CTTCGC	1	0.00242718	ACCTTG	0	0	TAAATT	0	0		ATTGTT	2	0.000456934	AACGTC	2	0.000549602	GAATCG	0	0	AGCGAG	0
CCTACA	219	0.0652757	GAGTAG	7	0.00746269	GGCGGT	1	0.00537634	TCTCTT	3	0.000348797		TAAGTG	1	0.000194553	AGAGTG	1	0.000152462	TGCCGC	0	0	TGCTCT	0	0		TACTTG	7	0.01983	TACTCC	1	0.00242718	ATAACG	0	0	CGTTTG	0	0		GTGTTT	2	0.000456934	AGTTCT	2	0.000549602	GGGCAT	0	0	CGAAGT	0
TCGTTA	218	0.0649776	CATATT	7	0.00746269	ATCAAG	1	0.00537634	ATGCAC	3	0.000348797		CAGGTA	1	0.000194553	GCGGAG	1	0.000152462	ATATGC	0	0	TGCTCG	0	0		AGGCGA	7	0.01983	CGGGGA	1	0.00242718	GGAGAC	0	0	TAAACT	0	0		CCTCAC	2	0.000456934	GCGCTC	2	0.000549602	GTTTAG	0	0	GGCAAC	0
GGGTCG	218	0.0649776	CTCTGC	7	0.00746269	GCGCCC	1	0.00537634	GTACTA	3	0.000348797		GTTTCT	1	0.000194553	AATATG	1	0.000152462	TCGGAA	0	0	TGCTCC	0	0		GTATTC	7	0.01983	TCAGGC	1	0.00242718	ACAATG	0	0	TAATCG	0	0		CCTGCG	2	0.000456934	AAGATG	2	0.000549602	GCCAGA	0	0	ACGGTT	0
CCCAAT	218	0.0649776	CTGATG	7	0.00746269	TTCGCG	1	0.00537634	GAGTCC	3	0.000348797		GTTTTC	1	0.000194553	CAATCA	1	0.000152462	CTTAAA	0	0	GTCACC	0	0		TTCGTA	7	0.01983	CGGGCA	1	0.00242718	AGTTCG	0	0	TAAACC	0	0		AGCGGA	2	0.000456934	TATGCG	2	0.000549602	CGAATG	0	0	GGATGC	0
CTAGTG	218	0.0649776	TGTGTT	7	0.00746269	ATCCAT	1	0.00537634	GCTCAG	3	0.000348797		GTTTTG	1	0.000194553	AAACCG	1	0.000152462	TGCGTC	0	0	TGCTGT	0	0		GTTATC	7	0.01983	CGGTAG	1	0.00242718	GGACCC	0	0	GACTAT	0	0		AGTCTG	2	0.000456934	CGGTTC	2	0.000549602	GGCTTC	0	0	GGATGA	0
CGCACT	217	0.0646796	TAACTT	7	0.00746269	TTCGGG	1	0.00537634	GGATGG	3	0.000348797		GTTGGG	1	0.000194553	ACAGTC	1	0.000152462	CTAGAC	0	0	TGCTGG	0	0		CAGTAC	7	0.01983	CGGTAC	1	0.00242718	GGACCA	0	0	TAAAGC	0	0		GCGCAG	2	0.000456934	TGCAGC	2	0.000549602	GCCCGA	0	0	CCACGG	0
ACGACA	217	0.0646796	ACCCAC	7	0.00746269	TTGACC	1	0.00537634	GCGGCA	3	0.000348797		GTTGTC	1	0.000194553	TTATGC	1	0.000152462	TGCTAT	0	0	ACTAAA	0	0		TATGTT	7	0.01983	ATCACC	1	0.00242718	TAAAAA	0	0	TAAAGA	0	0		TCCGTG	2	0.000456934	TGCAGA	2	0.000549602	GAGTAG	0	0	GGATTA	0
CCCGCA	217	0.0646796	GGGGGT	7	0.00746269	GGCCGT	1	0.00537634	TGTGTA	3	0.000348797		ATGCCA	1	0.000194553	ACTCGC	1	0.000152462	TGCTAG	0	0	AGGTAT	0	0		TATGAC	7	0.01983	CCGGTG	1	0.00242718	GGACGC	0	0	CACAGA	0	0		TTACTG	2	0.000456934	CATCCT	2	0.000549602	GGGAAA	0	0	CCGAGG	0
CAGTAC	217	0.0646796	TGATCC	7	0.00746269	AGGACT	1	0.00537634	GTCGGG	3	0.000348797		ACGTTA	1	0.000194553	AGTGAG	1	0.000152462	TGCTAC	0	0	TGCGTG	0	0		TAACGC	7	0.01983	CGGATC	1	0.00242718	TCACGG	0	0	ATTATT	0	0		CGGCGA	2	0.000456934	TGATCG	2	0.000549602	GGCTTT	0	0	CAATAC	0
GTCGCA	217	0.0646796	CGGCTG	7	0.00746269	TTATAC	1	0.00537634	GGTGAG	3	0.000348797		GGCTTT	1	0.000194553	AATTCC	1	0.000152462	GCCCCA	0	0	TGCGTC	0	0		AGGAAA	7	0.01983	GCGAGA	1	0.00242718	CGAACG	0	0	TAACGC	0	0		TCTTGT	2	0.000456934	TTAAAC	2	0.000549602	GGCACA	0	0	GGCATC	0
TTAGTG	217	0.0646796	GTCTTG	7	0.00746269	GGCTTT	1	0.00537634	CTTGGA	3	0.000348797		TAAAGG	1	0.000194553	AGGCCC	1	0.000152462	TGCGCT	0	0	ATTATC	0	0		TGCAGC	7	0.01983	TACTCG	1	0.00242718	GCTTCC	0	0	TAACGA	0	0		CGGTAC	2	0.000456934	CATTTT	2	0.000549602	ACCTCG	0	0	GGCATA	0
TGGCAT	217	0.0646796	AAATAG	7	0.00746269	TTATAT	1	0.00537634	AGGCCG	3	0.000348797		TAAATC	1	0.000194553	AACGAT	1	0.000152462	TGCGCG	0	0	CTCTTA	0	0		TGCATG	7	0.01983	CTTAAT	1	0.00242718	GCTTCA	0	0	TAACTC	0	0		CTGGTC	2	0.000456934	TGTTAC	2	0.000549602	GCCCCC	0	0	ATCCTG	0
CGCCTG	216	0.0643815	CCCTGG	7	0.00746269	TTAGTG	1	0.00537634	GACCTG	3	0.000348797		TAAAAG	1	0.000194553	ATATCC	1	0.000152462	TGCGCC	0	0	TGCTAT	0	0		TCCAAT	7	0.01983	CGGCGC	1	0.00242718	TCCTTG	0	0	TCGTCG	0	0		GTGTCC	2	0.000456934	CAGGGG	2	0.000549602	CTAGTG	0	0	CGTGTG	0
AAGACT	216	0.0643815	TCACGA	7	0.00746269	ATCATT	1	0.00537634	TATCGC	3	0.000348797		AAGCGA	1	0.000194553	AACGCT	1	0.000152462	CAGCGT	0	0	TTGTGA	0	0		TTATTG	7	0.01983	TGCAAG	1	0.00242718	ACCCAT	0	0	TAACGT	0	0		TGTTCC	2	0.000456934	TTACTC	2	0.000549602	ATGGTG	0	0	GGCATT	0
CGCCCT	216	0.0643815	TATTGA	7	0.00746269	GCCGGT	1	0.00537634	AATCTG	3	0.000348797		CTCTGA	1	0.000194553	AACGCC	1	0.000152462	TGCGGT	0	0	TGGGAC	0	0		CGCGCA	7	0.01983	TGTCTC	1	0.00242718	GCTTCT	0	0	TAACCA	0	0		AGTCAC	2	0.000456934	TCATCT	2	0.000549602	GCCCAC	0	0	TTAGAG	0
AGGACT	216	0.0643815	CACGAC	7	0.00746269	GCTACC	1	0.00537634	ATGACC	3	0.000348797		GCCCCC	1	0.000194553	ACGAGC	1	0.000152462	TGCGGG	0	0	TGCGTT	0	0		CGTGAA	7	0.01983	GCTGGA	1	0.00242718	GCAAAG	0	0	ACGAGA	0	0		GTTCAT	2	0.000456934	GCTATT	2	0.000549602	AATCTG	0	0	GGCACT	0
GGGGCA	216	0.0643815	CTTCGA	7	0.00746269	CACTGT	1	0.00537634	GAAAAT	3	0.000348797		GGTGAC	1	0.000194553	ATATCG	1	0.000152462	TGCGGC	0	0	TGCACG	0	0		CTTATA	7	0.01983	CGTCTG	1	0.00242718	GAGGAA	0	0	ATGAGT	0	0		GGACCC	2	0.000456934	TGTCCC	2	0.000549602	GGGAGC	0	0	CGACAT	0
CCCCAG	216	0.0643815	CGCCGG	7	0.00746269	CGATCA	1	0.00537634	TAGGTG	3	0.000348797		GGTGCC	1	0.000194553	AGGCAG	1	0.000152462	TGATTT	0	0	TGCACC	0	0		AGTAAA	7	0.01983	GCGGTT	1	0.00242718	GCTGTC	0	0	TAACCT	0	0		GTTACC	2	0.000456934	TGTCAG	2	0.000549602	GGGAGA	0	0	GGCACC	0
GAGCAC	215	0.0640835	GCTACT	7	0.00746269	ATACCG	1	0.00537634	CGGCCC	3	0.000348797		GGTGCG	1	0.000194553	AACCTG	1	0.000152462	TGATTG	0	0	ATAACC	0	0		TGCTCG	7	0.01983	ACCGTT	1	0.00242718	GCGGCA	0	0	ACGACT	0	0		AATGAA	2	0.000456934	CGCCGT	2	0.000549602	GCCCAA	0	0	GATTCG	0
CTCTCT	215	0.0640835	CCTTAC	7	0.00746269	TTCATG	1	0.00537634	AGCCTC	3	0.000348797		GGTATT	1	0.000194553	CGTACA	1	0.000152462	AACCCA	0	0	TGCAAT	0	0		ACCCAA	7	0.01983	AAGAGG	1	0.00242718	GCTTAC	0	0	TAACCC	0	0		TGTCGG	2	0.000456934	CCGCGT	2	0.000549602	CCCGCA	0	0	GGCAGC	0
CACCTC	215	0.0640835	ATATTA	7	0.00746269	GGCGCT	1	0.00537634	AAGTTG	3	0.000348797		GGTCAC	1	0.000194553	ACGACC	1	0.000152462	GTAAAT	0	0	TGCAGG	0	0		CGCCCT	7	0.01983	TACGGC	1	0.00242718	GCTTAA	0	0	ACCTCA	0	0		AGTGTT	2	0.000456934	TGTGTG	2	0.000549602	GGGAAC	0	0	GGCAGA	0
GGGGCG	215	0.0640835	AGCGTG	7	0.00746269	CCGTCC	1	0.00537634	TAGGGG	3	0.000348797		GGTCCC	1	0.000194553	ACAAGA	1	0.000152462	GACTAC	0	0	TGCAGC	0	0		GTATGC	7	0.01983	GTCAGA	1	0.00242718	GCTGTT	0	0	CGAGGG	0	0		CTGTCC	2	0.000456934	AATCCT	2	0.000549602	ACTCAA	0	0	CCTACT	0
CCCCTA	215	0.0640835	GCTCGT	7	0.00746269	GCGACT	1	0.00537634	TCACGA	3	0.000348797		GGTGGC	1	0.000194553	ACGTAG	1	0.000152462	TGCAAT	0	0	TTCGCA	0	0		GGGGCC	7	0.01983	ATTACG	1	0.00242718	GGAAAC	0	0	TGAAAT	0	0		GTTAGT	2	0.000456934	GTGTGT	2	0.000549602	ACTCCG	0	0	CGCAAA	0
CAGACC	215	0.0640835	ACGCGG	7	0.00746269	ATAGCG	1	0.00537634	TCAACT	3	0.000348797		GGTTAT	1	0.000194553	ATACAT	1	0.000152462	TGCAAC	0	0	TGCACT	0	0		CTCCCG	7	0.01983	CGGTGG	1	0.00242718	GGAAAA	0	0	TAGTGG	0	0		CATATA	2	0.000456934	TGTCGA	2	0.000549602	GCCCCA	0	0	GGAGCC	0
TGCAGG	215	0.0640835	CTCTAG	7	0.00746269	ATAGCC	1	0.00537634	AACCCG	3	0.000348797		GGAATA	1	0.000194553	AACCGT	1	0.000152462	GGGAGC	0	0	TGATTG	0	0		TCTTTG	7	0.01983	CGGTCC	1	0.00242718	GCTTTT	0	0	CCTTGC	0	0		GAATCG	2	0.000456934	GCTCCA	2	0.000549602	GGGAGG	0	0	GGAGCA	0
TGGCCA	215	0.0640835	CGCAAC	7	0.00746269	AACCGG	1	0.00537634	TTAGTC	3	0.000348797		CACACA	1	0.000194553	ATTTCT	1	0.000152462	TGATCT	0	0	TGATTC	0	0		GCACGC	7	0.01983	CGTCGC	1	0.00242718	GGAACA	0	0	ACCTAT	0	0		GCATCG	2	0.000456934	TTACCG	2	0.000549602	GGGGGA	0	0	ACGTCA	0
ACGACC	215	0.0640835	ATAACA	7	0.00746269	ATATCT	1	0.00537634	CCGTCT	3	0.000348797		GGTGGT	1	0.000194553	CGTTCG	1	0.000152462	GCGCGA	0	0	TCGCAT	0	0		AGAATA	7	0.01983	TACTAC	1	0.00242718	GGAAAT	0	0	TCCGTT	0	0		TCTCGA	2	0.000456934	CAAATC	2	0.000549602	TGCACG	0	0	GGCGAG	0
CGACCG	215	0.0640835	GCCCTT	7	0.00746269	ATACAC	1	0.00537634	GTCTAC	3	0.000348797		GGTGTC	1	0.000194553	ATGTAG	1	0.000152462	TGATCC	0	0	CCGGTA	0	0		GCCACG	7	0.01983	CGGTTG	1	0.00242718	GGGTAC	0	0	ACCTCT	0	0		TGTGCT	2	0.000456934	GGCATA	2	0.000549602	GGGTAC	0	0	GGAGCT	0
GTGGGA	215	0.0640835	TGTGAG	7	0.00746269	GCGCAG	1	0.00537634	GGCGTC	3	0.000348797		GCGAAC	1	0.000194553	ACAAGT	1	0.000152462	TCAAAC	0	0	TGCAAG	0	0		CTAACT	7	0.01983	CGCCTG	1	0.00242718	GCTTGT	0	0	GCAAGG	0	0		TGTGCG	2	0.000456934	GCTTGC	2	0.000549602	GGGGGT	0	0	AGGAAG	0
TACAGG	214	0.0637854	GGTAGT	7	0.00746269	GGCTCC	1	0.00537634	GGCGTG	3	0.000348797		GGGCCC	1	0.000194553	CACCCT	1	0.000152462	TGATGT	0	0	TGCAAC	0	0		CGACGT	7	0.01983	TCAGTC	1	0.00242718	AACAGT	0	0	TACCCC	0	0		AAGTTA	2	0.000456934	ACAATC	2	0.000549602	TACTGG	0	0	ATATTG	0
TACTGT	214	0.0637854	CGGCGC	7	0.00746269	ATAATC	1	0.00537634	GCTCCG	3	0.000348797		TTCCGT	1	0.000194553	CGTGTA	1	0.000152462	GAATTA	0	0	TGGCCA	0	0		ATAGAA	7	0.01983	GCCCAC	1	0.00242718	CCAACG	0	0	ACCTCC	0	0		GCATCC	2	0.000456934	GCTGTC	2	0.000549602	GGGGAT	0	0	CAATTA	0
TGTAGA	214	0.0637854	TGCCTA	7	0.00746269	ACTTAT	1	0.00537634	TCTATA	3	0.000348797		GGGGGC	1	0.000194553	ATTCTA	1	0.000152462	GAGCTA	0	0	TCGCGA	0	0		CTTCGA	7	0.01983	CGCCAA	1	0.00242718	GGAGTC	0	0	TCCGGG	0	0		GTTATT	2	0.000456934	GCGCGC	2	0.000549602	GCATTC	0	0	GGAGAT	0
CCACAC	214	0.0637854	TGTGGG	7	0.00746269	ATACCC	1	0.00537634	CACTAT	3	0.000348797		GGGGGG	1	0.000194553	ACGGGT	1	0.000152462	CCCGGT	0	0	ATCCAA	0	0		GCGAAA	7	0.01983	GGGGTT	1	0.00242718	AGGCCG	0	0	TACGGC	0	0		AGTGAT	2	0.000456934	CACGGT	2	0.000549602	GCATAT	0	0	ATCGTA	0
ACACAT	214	0.0637854	AGTCAG	7	0.00746269	TTCATC	1	0.00537634	ATACCT	3	0.000348797		GATAGT	1	0.000194553	ACTGGT	1	0.000152462	CATCTT	0	0	TGCCCC	0	0		TACGAT	7	0.01983	GGTGGG	1	0.00242718	GCTTTA	0	0	ACCTAA	0	0		GACTTC	2	0.000456934	TTAAAT	2	0.000549602	TTTGTC	0	0	GGAGAC	0
AGCACT	214	0.0637854	GCGAGG	7	0.00746269	GCCTGT	1	0.00537634	TCAAGG	3	0.000348797		GGGCGC	1	0.000194553	ATGTAC	1	0.000152462	TGCATT	0	0	GAAGAG	0	0		ATTACC	7	0.01983	CGCCGA	1	0.00242718	GGCACT	0	0	TACGCA	0	0		TGTCTG	2	0.000456934	GCCTTC	2	0.000549602	GCATCA	0	0	ACGTAA	0
GATCCG	214	0.0637854	GGCCAC	7	0.00746269	AACCCG	1	0.00537634	GAACAT	3	0.000348797		GGGCGG	1	0.000194553	TGGCCC	1	0.000152462	TGCATG	0	0	TGCCAT	0	0		CTGAGC	6	0.0169972	CGGATT	1	0.00242718	TGTGTG	0	0	TACGAT	0	0		ATTTAC	2	0.000456934	GGCTTT	2	0.000549602	GGGTAA	0	0	CAGGCG	0
TCATCA	214	0.0637854	TGGACA	7	0.00746269	CTTAAT	1	0.00537634	CCTAAC	3	0.000348797		GGGGTT	1	0.000194553	TAAGTA	1	0.000152462	TCTAAA	0	0	TGCCGG	0	0		GGCAGC	6	0.0169972	AACTCA	1	0.00242718	GGCACC	0	0	TACGGA	0	0		AGGTAC	2	0.000456934	GCGTAG	2	0.000549602	GCATAA	0	0	AATTCA	0
GGGACC	214	0.0637854	GTTATT	7	0.00746269	AGTGAG	1	0.00537634	CCGTTG	3	0.000348797		TGTGCA	1	0.000194553	CAAGCG	1	0.000152462	CGCTAA	0	0	TGCCGC	0	0		CGACTT	6	0.0169972	TCATAA	1	0.00242718	GGCAGT	0	0	ACCGTT	0	0		TTACTC	2	0.000456934	GCGGGA	2	0.000549602	GGGTAT	0	0	GGATAC	0
ATACTC	214	0.0637854	TCCATA	7	0.00746269	GGCATG	1	0.00537634	ATTAGA	3	0.000348797		GGGTCT	1	0.000194553	AGTCAT	1	0.000152462	TGCCAT	0	0	AAGGTC	0	0		GCCCCG	6	0.0169972	CCGTGT	1	0.00242718	GGCAGC	0	0	TCAAAG	0	0		GCGGTA	2	0.000456934	GCGGAC	2	0.000549602	TACACG	0	0	ACGTAC	0
CATCGT	213	0.0634873	ATGTTC	7	0.00746269	ACAGGA	1	0.00537634	TGATGT	3	0.000348797		GGGTGT	1	0.000194553	CAAAGG	1	0.000152462	TGCCAG	0	0	TGCCCT	0	0		CTCCCC	6	0.0169972	TCAGTG	1	0.00242718	ACCCAA	0	0	ACCTAC	0	0		CGACCC	2	0.000456934	GGCACC	2	0.000549602	AACACG	0	0	GGATCC	0
GTAGGA	213	0.0634873	TATTTC	7	0.00746269	ATCTCT	1	0.00537634	AGCTGA	3	0.000348797		GTCACT	1	0.000194553	ACGCGT	1	0.000152462	TGCCAC	0	0	TGCATG	0	0		TATAGT	6	0.0169972	TACTGG	1	0.00242718	GGCAAA	0	0	ATAATA	0	0		GGACGT	2	0.000456934	GGCAAG	2	0.000549602	GCATAC	0	0	GGATCA	0
TCACCA	213	0.0634873	TTCTTG	7	0.00746269	CTATCA	1	0.00537634	TATCGT	3	0.000348797		AATTCA	1	0.000194553	ACTGAT	1	0.000152462	CCCTCC	0	0	TGCATC	0	0		CTCCAA	6	0.0169972	TCCAGG	1	0.00242718	GGATTT	0	0	CGGAAG	0	0		AGGTTC	2	0.000456934	GGCAAA	2	0.000549602	GGGGTA	0	0	GGAGTC	0
TCGTTG	213	0.0634873	TCTTGA	7	0.00746269	AGTGCT	1	0.00537634	AGAAGA	3	0.000348797		GGGTAT	1	0.000194553	AAGTCC	1	0.000152462	GATGAA	0	0	CCTCGG	0	0		TATTAG	6	0.0169972	TTTTGG	1	0.00242718	GGATTC	0	0	CGGGGA	0	0		CCTTAT	2	0.000456934	GGCCGC	2	0.000549602	AACGGG	0	0	GGAGTA	0
GCTCAC	213	0.0634873	GGCGTC	7	0.00746269	AGTGGC	1	0.00537634	ATCGCC	3	0.000348797		GTAGGG	1	0.000194553	ACTTGT	1	0.000152462	TGCACG	0	0	GCACGA	0	0		CGTACG	6	0.0169972	TCATGA	1	0.00242718	GGCACA	0	0	TACGAC	0	0		ACGCTA	2	0.000456934	GGCCCG	2	0.000549602	AATGAC	0	0	GATCCG	0
CTGCTA	213	0.0634873	GGGATC	7	0.00746269	TTCTGC	1	0.00537634	TACTTA	3	0.000348797		GTATTT	1	0.000194553	AAGTGC	1	0.000152462	TGCACC	0	0	ATCTAA	0	0		GAGTCA	6	0.0169972	GTCTGT	1	0.00242718	GGCAAT	0	0	TACGAA	0	0		GCAGCC	2	0.000456934	GTCTCT	2	0.000549602	GGGGTC	0	0	GGATAA	0
CAGCAT	213	0.0634873	ATAGTC	6	0.00639659	TTACAG	1	0.00537634	AGACTT	3	0.000348797		GTCACG	1	0.000194553	GGACAG	1	0.000152462	CACAAC	0	0	TGCCAC	0	0		GCCCAG	6	0.0169972	CGCTTC	1	0.00242718	GGCAAC	0	0	TAATTT	0	0		GTGAAG	2	0.000456934	GGCATG	2	0.000549602	GGGCTA	0	0	GATCGG	0
CTGTCT	213	0.0634873	CTACGA	6	0.00639659	ATCTAC	1	0.00537634	ACTGTT	3	0.000348797		GTCAGT	1	0.000194553	TGAAGG	1	0.000152462	TGCAGT	0	0	TCAACC	0	0		GAGGCA	6	0.0169972	AACGGA	1	0.00242718	GGCCCA	0	0	TAAGCT	0	0		CCTCTA	2	0.000456934	TCTTGT	2	0.000549602	GGGCGT	0	0	ACGCGC	0
TGCCCT	213	0.0634873	TGAAAT	6	0.00639659	AATCCA	1	0.00537634	GGGTTT	3	0.000348797		GTATAG	1	0.000194553	TGGGGA	1	0.000152462	CACCCA	0	0	GCCGTA	0	0		CCTTCA	6	0.0169972	AATACC	1	0.00242718	GGCCAT	0	0	TAATTC	0	0		CCTCTG	2	0.000456934	GGACCA	2	0.000549602	GCATCC	0	0	GGTATG	0
CGGTAT	212	0.0631893	TAGACA	6	0.00639659	GGGCCT	1	0.00537634	TGACCG	3	0.000348797		GTATCC	1	0.000194553	CATCTA	1	0.000152462	TGCAGC	0	0	TTGGGC	0	0		GTTAAT	6	0.0169972	CGGACC	1	0.00242718	ACCATT	0	0	TCGTTC	0	0		GTCTTC	2	0.000456934	GCTTTG	2	0.000549602	GAGTCG	0	0	CTGTTG	0
CAGCCT	212	0.0631893	GTCCCG	6	0.00639659	ATCCTT	1	0.00537634	AGTATC	3	0.000348797		GTATCG	1	0.000194553	CCCTCA	1	0.000152462	TTGGGG	0	0	GAGGTA	0	0		CTGATT	6	0.0169972	CGCTTA	1	0.00242718	GGTGTC	0	0	TACAAC	0	0		AGGCTT	2	0.000456934	GTGGTC	2	0.000549602	GGGCTC	0	0	GCGGAC	0
GTGAGT	212	0.0631893	GATCTT	6	0.00639659	GCCATC	1	0.00537634	CCTTTT	3	0.000348797		CAGACG	1	0.000194553	ATGGCG	1	0.000152462	TTGGGC	0	0	TTGGCT	0	0		CGCACG	6	0.0169972	CACACT	1	0.00242718	GGCCGA	0	0	ACGAAC	0	0		CACAAC	2	0.000456934	GGATGC	2	0.000549602	GGGCGC	0	0	GGAATG	0
TCACAG	212	0.0631893	CCCCTT	6	0.00639659	ATGAAC	1	0.00537634	AGGATT	3	0.000348797		CAAGAT	1	0.000194553	CGCGTA	1	0.000152462	ATGACG	0	0	TTGGTG	0	0		CGACCA	6	0.0169972	TCCATA	1	0.00242718	CAGCGC	0	0	TAATGC	0	0		TCCAAA	2	0.000456934	GGATCC	2	0.000549602	GCCACA	0	0	GCGGCC	0
GCCGCG	211	0.0628912	ATCCAT	6	0.00639659	TTAAGC	1	0.00537634	AATATC	3	0.000348797		CATACA	1	0.000194553	ACGGCG	1	0.000152462	CGCACA	0	0	TTGGTC	0	0		TCCCGG	6	0.0169972	CGCGAA	1	0.00242718	GAAATC	0	0	TAATGA	0	0		AGGGAC	2	0.000456934	GGCGAG	2	0.000549602	GCCAAA	0	0	ACTACT	0
GTATTA	211	0.0628912	AGTCGT	6	0.00639659	GCGTCG	1	0.00537634	TTGGAG	3	0.000348797		TGATAC	1	0.000194553	TGCACA	1	0.000152462	TTGGTG	0	0	GGTAGA	0	0		TATAGG	6	0.0169972	TTCAAG	1	0.00242718	GGCATC	0	0	TAATCT	0	0		ACCACG	2	0.000456934	GGAGGA	2	0.000549602	GCCAAC	0	0	GCGGAT	0
GTATGG	211	0.0628912	GTTCGA	6	0.00639659	TTAATT	1	0.00537634	TTCGGG	3	0.000348797		GTCCAC	1	0.000194553	ATGGTC	1	0.000152462	TTGGTC	0	0	TATAAA	0	0		GAGAAA	6	0.0169972	TCCATG	1	0.00242718	GGCATA	0	0	CTCTGG	0	0		TGTTGA	2	0.000456934	GATATC	2	0.000549602	GATGGT	0	0	GCGCTA	0
GTTCGG	211	0.0628912	GAGCTC	6	0.00639659	GGCAGG	1	0.00537634	CGCGCA	3	0.000348797		GTCCAT	1	0.000194553	AGTAGT	1	0.000152462	TATATA	0	0	CATGAA	0	0		GTTGGG	6	0.0169972	TAACTT	1	0.00242718	GGCCAC	0	0	GACTCG	0	0		AGGTTT	2	0.000456934	CACAGT	2	0.000549602	CCCTAC	0	0	ACTAGA	0
AGTACC	211	0.0628912	ATACGC	6	0.00639659	TCCACC	1	0.00537634	GTGAGA	3	0.000348797		GTCCCT	1	0.000194553	ATGGGT	1	0.000152462	TTGGGT	0	0	TTGGAC	0	0		CCCCCC	6	0.0169972	CACTGG	1	0.00242718	GGCCAA	0	0	CGAGCA	0	0		CCAACA	2	0.000456934	GATTCT	2	0.000549602	AATCGT	0	0	TCATTA	0
CCACCA	210	0.0625931	AACATA	6	0.00639659	AGTCCT	1	0.00537634	GCCATC	3	0.000348797		GGTTTT	1	0.000194553	AAGGTT	1	0.000152462	ACGGTA	0	0	TACCTC	0	0		GTCTCA	6	0.0169972	TCAAAA	1	0.00242718	AGTCCG	0	0	ACCTGA	0	0		AGGTCT	2	0.000456934	TCTCGT	2	0.000549602	AATGAG	0	0	AATATG	0
TTAGTC	210	0.0625931	ATTCTT	6	0.00639659	TTTAGA	1	0.00537634	GCCATG	3	0.000348797		GTGTAT	1	0.000194553	GCCCGA	1	0.000152462	TTGGAC	0	0	ATCTTA	0	0		TCAACA	6	0.0169972	CTCAGT	1	0.00242718	GGAGGT	0	0	TACATA	0	0		TTAAGC	2	0.000456934	GCCCTG	2	0.000549602	GGGGAC	0	0	TCAGTG	0
CTAACA	210	0.0625931	GACCAC	6	0.00639659	GGCCCC	1	0.00537634	ATATAT	3	0.000348797		GTAATC	1	0.000194553	CAACGT	1	0.000152462	AAATGT	0	0	CCACAA	0	0		ACACGC	6	0.0169972	GCGAAA	1	0.00242718	CGTTTA	0	0	TACAGT	0	0		CTGTAA	2	0.000456934	CTTATT	2	0.000549602	CCGTAG	0	0	GCGCTC	0
ACCACC	210	0.0625931	CACCAT	6	0.00639659	GATTTT	1	0.00537634	CTCGCC	3	0.000348797		GTAATT	1	0.000194553	CAACTT	1	0.000152462	TTGCTG	0	0	TTGGCC	0	0		TCGGAG	6	0.0169972	GGCTCT	1	0.00242718	GGAGGA	0	0	ACCTTC	0	0		AGTACC	2	0.000456934	AGCGGT	2	0.000549602	CACAGT	0	0	GCGTAT	0
ACCCAC	210	0.0625931	TCAATG	6	0.00639659	CCTTTA	1	0.00537634	CAAGTA	3	0.000348797		GTAACC	1	0.000194553	ATGGTT	1	0.000152462	GGTGCA	0	0	CTCCTC	0	0		TGCGAA	6	0.0169972	CACCCA	1	0.00242718	CTCATG	0	0	ACCTGC	0	0		GTTAAG	2	0.000456934	ATCATT	2	0.000549602	TGCCGG	0	0	GCGGTT	0
CTCATA	210	0.0625931	TCTATC	6	0.00639659	TTCTGT	1	0.00537634	ATATAG	3	0.000348797		GTAAGC	1	0.000194553	AAGGAG	1	0.000152462	TTGGCC	0	0	TTGGAT	0	0		CTAAAA	6	0.0169972	CCCCCT	1	0.00242718	AAGACG	0	0	AGTTTA	0	0		CCTTTC	2	0.000456934	ACAGGA	2	0.000549602	GGGCTT	0	0	ACTACA	0
GAGACG	210	0.0625931	GGTGCT	6	0.00639659	CAAGTG	1	0.00537634	GTTGGA	3	0.000348797		GTAAGG	1	0.000194553	CAAGAT	1	0.000152462	GGGGCC	0	0	CTCAGA	0	0		GGCCCC	6	0.0169972	ATAGCG	1	0.00242718	ACCTCG	0	0	ACCTGT	0	0		ACCTAC	2	0.000456934	GAGCCC	2	0.000549602	GCATCT	0	0	ACTACC	0
CGTACC	209	0.0622951	CGTGAT	6	0.00639659	CGATAC	1	0.00537634	AACAGA	3	0.000348797		GTACCG	1	0.000194553	CAGCTT	1	0.000152462	TTGGAT	0	0	GCCTAA	0	0		GTACGA	6	0.0169972	AAGCAG	1	0.00242718	GGAGCA	0	0	TGTCGG	0	0		TTAAAT	2	0.000456934	GTCGAT	2	0.000549602	GCATGC	0	0	ACGTTA	0
ATGGCT	209	0.0622951	ATACTA	6	0.00639659	TTCTAC	1	0.00537634	CTATGT	3	0.000348797		GTAGAC	1	0.000194553	AGTAGC	1	0.000152462	CGAGCA	0	0	TGCTAC	0	0		GTTCTA	6	0.0169972	AAACAC	1	0.00242718	CGTGAG	0	0	ACCTTT	0	0		TGGGCG	2	0.000456934	GGTAGT	2	0.000549602	GCCTGA	0	0	GCGTAC	0
AACAAC	209	0.0622951	TGCCTC	6	0.00639659	GCGCGC	1	0.00537634	GGTGGG	3	0.000348797		GTAGAG	1	0.000194553	ATGGTG	1	0.000152462	TTGTGC	0	0	GGTCCA	0	0		CCCCGT	6	0.0169972	CCCCCG	1	0.00242718	CACCTC	0	0	GCATGG	0	0		ACGGCC	2	0.000456934	CGTGTA	2	0.000549602	GGCCAT	0	0	GCGTAA	0
GACCCA	208	0.061997	TGGGGT	6	0.00639659	TACATA	1	0.00537634	AGGCAC	3	0.000348797		TATTGT	1	0.000194553	GTGCTC	1	0.000152462	AATGCC	0	0	TTGTTG	0	0		TACAGT	6	0.0169972	AAACCA	1	0.00242718	GGAGCT	0	0	TACAGC	0	0		AGATGA	2	0.000456934	GAGGCC	2	0.000549602	GGCATT	0	0	GCGGGC	0
ATCGCG	208	0.061997	ACATCG	6	0.00639659	ACCGAG	1	0.00537634	AGCTGT	3	0.000348797		GTACGG	1	0.000194553	AAGACC	1	0.000152462	TTGTCT	0	0	TTGTTC	0	0		CCCATT	6	0.0169972	TCAACA	1	0.00242718	GACGGA	0	0	TACAGA	0	0		TCCTAC	2	0.000456934	GAGCTG	2	0.000549602	TGTTGG	0	0	GCGGGA	0
TCTCTT	208	0.061997	GGGATG	6	0.00639659	TTCTAT	1	0.00537634	CGCGGC	3	0.000348797		GTACTG	1	0.000194553	ATGCGG	1	0.000152462	TTTGGG	0	0	ACTGAT	0	0		TCCCAG	6	0.0169972	GGCCTT	1	0.00242718	GGAGCC	0	0	TTCGCA	0	0		GCAGCT	2	0.000456934	GAGCTC	2	0.000549602	GGCCCC	0	0	GCGGCT	0
TCGCCC	208	0.061997	TCTAAT	6	0.00639659	ATGGGA	1	0.00537634	CCCCGG	3	0.000348797		CTGGGG	1	0.000194553	ATAACT	1	0.000152462	TTGTTC	0	0	CTGGTA	0	0		CTTCGT	6	0.0169972	TTTAGA	1	0.00242718	GGATCT	0	0	GGCGAA	0	0		AGGTGC	2	0.000456934	GCCCCC	2	0.000549602	GCCTCT	0	0	GCGGTA	0
TGATGA	208	0.061997	TGCTTC	6	0.00639659	AGAGTC	1	0.00537634	GCCCGC	3	0.000348797		ATAATC	1	0.000194553	AGAACT	1	0.000152462	GGGTTC	0	0	TTGTAG	0	0		TCCCGT	6	0.0169972	CTCCTA	1	0.00242718	CTTAGC	0	0	GGCCAA	0	0		AGGTGG	2	0.000456934	CAGCCG	2	0.000549602	GGGGAG	0	0	GCGGGT	0
CCACTT	208	0.061997	ACAATA	6	0.00639659	TGCACC	1	0.00537634	CGCGAT	3	0.000348797		CCAATT	1	0.000194553	ATAGGT	1	0.000152462	TTGTGT	0	0	GTGTAA	0	0		ATACTC	6	0.0169972	TGCGAT	1	0.00242718	AAATGG	0	0	CAGATG	0	0		GCTACA	2	0.000456934	GGTTCT	2	0.000549602	GGCTGG	0	0	GAGTCC	0
TGATCG	208	0.061997	CGTGCC	6	0.00639659	TTCTTT	1	0.00537634	AGTAGC	3	0.000348797		ATAAAG	1	0.000194553	AACGCA	1	0.000152462	TTGTAG	0	0	TACGCC	0	0		CTTGAC	6	0.0169972	CCCAGT	1	0.00242718	GGATGT	0	0	ACCATA	0	0		TCTGAA	2	0.000456934	CCAGCC	2	0.000549602	TCGAAG	0	0	GCGATA	0
AGCCCA	208	0.061997	CTAACG	6	0.00639659	ATTATA	1	0.00537634	GGCAGT	3	0.000348797		GAGTGG	1	0.000194553	TTAGAT	1	0.000152462	TTGTAC	0	0	TTGGTT	0	0		TGCGGC	6	0.0169972	CCGGGG	1	0.00242718	CGATCG	0	0	GGCCAT	0	0		CTAACA	2	0.000456934	AGCCTT	2	0.000549602	GGCCAC	0	0	AGAACG	0
TCAACG	208	0.061997	ACGTAG	6	0.00639659	GCGGAG	1	0.00537634	AAACTA	3	0.000348797		CACCCA	1	0.000194553	CAATCC	1	0.000152462	CTACCA	0	0	TTGTCG	0	0		GCTGCG	6	0.0169972	ATAGTT	1	0.00242718	GGATGA	0	0	AGGTCA	0	0		AATAAC	2	0.000456934	GCCGGG	2	0.000549602	GGCCAA	0	0	GCGACT	0
CCGCGG	208	0.061997	AAGTCG	6	0.00639659	AGTAGG	1	0.00537634	CACGAT	3	0.000348797		ATAGAG	1	0.000194553	AAGACG	1	0.000152462	ATCGGA	0	0	TTGTCC	0	0		CAACAC	6	0.0169972	CTCCTC	1	0.00242718	GGATAC	0	0	GGCCAC	0	0		CTAAGT	2	0.000456934	GCCGCC	2	0.000549602	GGGTGA	0	0	GGCCTG	0
CACATA	208	0.061997	GGACTC	6	0.00639659	CTTAGC	1	0.00537634	CACCTT	3	0.000348797		GACCTA	1	0.000194553	AGTCCG	1	0.000152462	TTGTCG	0	0	AAAGCG	0	0		TTATAC	6	0.0169972	GGTCTT	1	0.00242718	GGATAA	0	0	TCTTGG	0	0		ACCCCC	2	0.000456934	GGGCCT	2	0.000549602	GGCCCT	0	0	GCGAGT	0
CACTCT	207	0.061699	TGCGCC	6	0.00639659	TTCTTC	1	0.00537634	ATGTGG	3	0.000348797		CTAAGT	1	0.000194553	CAATTC	1	0.000152462	TTGTCC	0	0	TTGTAT	0	0		TTATCG	6	0.0169972	TAATAC	1	0.00242718	GGAGTT	0	0	GGCAGA	0	0		GGGCCT	2	0.000456934	TGGGAA	2	0.000549602	CAGATG	0	0	TGTGGT	0
AAGCGG	207	0.061699	CGACGA	6	0.00639659	ATCGCT	1	0.00537634	TCCATT	3	0.000348797		GACGGA	1	0.000194553	ATTGTA	1	0.000152462	CCCAAG	0	0	CCCTTT	0	0		ATGTGA	6	0.0169972	CTCCAC	1	0.00242718	GGATCA	0	0	GGCACT	0	0		CTAATA	2	0.000456934	GATTCC	2	0.000549602	GCCTAA	0	0	GCGAGC	0
GCTCGC	207	0.061699	CCTCTT	6	0.00639659	GGGAGG	1	0.00537634	AGCGGA	3	0.000348797		TGGATA	1	0.000194553	AATTGT	1	0.000152462	TTGTAT	0	0	GAAGGA	0	0		AAGATA	6	0.0169972	CTCCAA	1	0.00242718	GGATAT	0	0	GGCATC	0	0		CAACTC	2	0.000456934	GATTCA	2	0.000549602	GGCCGT	0	0	TCTTCT	0
GCGTCG	207	0.061699	ACGGCT	6	0.00639659	ATAAGC	1	0.00537634	CTAGAG	3	0.000348797		AGTGTG	1	0.000194553	GGCAAT	1	0.000152462	TTCTTG	0	0	ATCCTG	0	0		AACACC	6	0.0169972	CTCCCG	1	0.00242718	CGGCTT	0	0	GGCATA	0	0		CTCCAC	2	0.000456934	GCAGCG	2	0.000549602	TTTTTA	0	0	GCGAAC	0
GTCCTC	207	0.061699	TCCGCA	6	0.00639659	GAATTA	1	0.00537634	TCGAAG	3	0.000348797		AGTGGC	1	0.000194553	CAATTG	1	0.000152462	TTCTTC	0	0	TTGAAT	0	0		TTCAGC	6	0.0169972	ATATCT	1	0.00242718	GCACGG	0	0	GGCAGT	0	0		AAAGAT	2	0.000456934	GCAGCC	2	0.000549602	GCCTCC	0	0	GTGAGG	0
ATGTGG	207	0.061699	GACACG	6	0.00639659	ACGAGC	1	0.00537634	GGGTAC	3	0.000348797		AGTGGT	1	0.000194553	GTCGTT	1	0.000152462	AGCAGG	0	0	TCCCAC	0	0		AAGAAA	6	0.0169972	TGCATC	1	0.00242718	CGAGCA	0	0	GTCAGG	0	0		GGGCTC	2	0.000456934	AGCACT	2	0.000549602	GGCCGC	0	0	GCGACC	0
GTCACT	207	0.061699	GACGCG	6	0.00639659	AAGATA	1	0.00537634	TAGTAC	3	0.000348797		AGTTAC	1	0.000194553	ATGCGC	1	0.000152462	TTCTGT	0	0	TTGAGT	0	0		TGCGGG	6	0.0169972	GCTTGA	1	0.00242718	GCGGCT	0	0	GGCCGT	0	0		TAAATC	2	0.000456934	CGCACC	2	0.000549602	GCTAAG	0	0	ACTAGT	0
GTCCGG	207	0.061699	TAATCT	6	0.00639659	ACGAAT	1	0.00537634	TGCAGT	3	0.000348797		AGTTGG	1	0.000194553	AGGGGC	1	0.000152462	TTGAAG	0	0	TTGAGG	0	0		GACACA	6	0.0169972	ATACTC	1	0.00242718	CAAAAG	0	0	GCATGA	0	0		ACTTTT	2	0.000456934	GTGAGG	2	0.000549602	GCCTCA	0	0	GCGAAT	0
GCGCTG	207	0.061699	CAGTCG	6	0.00639659	CACCGC	1	0.00537634	TGCCGT	3	0.000348797		AGTTGT	1	0.000194553	AGGGGG	1	0.000152462	GTGCAA	0	0	TTGAGC	0	0		AGACCG	6	0.0169972	CTAAAC	1	0.00242718	GCGGCC	0	0	GGCCTT	0	0		GAGTTC	2	0.000456934	TACGAT	2	0.000549602	GGCAAT	0	0	TGATAG	0
TTGTGG	206	0.0614009	GGCAGC	6	0.00639659	CACCGG	1	0.00537634	CTCGAT	3	0.000348797		AGTTAT	1	0.000194553	CAGGTA	1	0.000152462	GGTATG	0	0	TTCTTG	0	0		ATGTTG	6	0.0169972	TCATCC	1	0.00242718	GCGCTC	0	0	ACTCCT	0	0		ACTTCT	2	0.000456934	GTCTGG	2	0.000549602	ATTTGG	0	0	CGCGGC	0
TCGAGT	206	0.0614009	CTTGAT	6	0.00639659	TGCGAC	1	0.00537634	TCGAGT	3	0.000348797		AGTTCG	1	0.000194553	CAAGTC	1	0.000152462	GTTGGA	0	0	TTCTTC	0	0		GCTGAA	6	0.0169972	GCGCGC	1	0.00242718	GCGCTA	0	0	GGCCTC	0	0		TTTTGC	2	0.000456934	CTGCGT	2	0.000549602	GGCAGT	0	0	GCGCCA	0
AGACTC	206	0.0614009	CATCCT	6	0.00639659	CACCTG	1	0.00537634	TCCAAG	3	0.000348797		GTTAGA	1	0.000194553	AGGTCG	1	0.000152462	AGTGCA	0	0	CTGCCT	0	0		GAGGCG	6	0.0169972	ATGTGT	1	0.00242718	ATAGAG	0	0	AGGCAA	0	0		ACTGTT	2	0.000456934	ACGCAT	2	0.000549602	CTCATC	0	0	GCGCAT	0
GGCGCC	206	0.0614009	AAATGC	6	0.00639659	GGTTAT	1	0.00537634	GGGGTG	3	0.000348797		CTATGA	1	0.000194553	AGGTGC	1	0.000152462	TGGAAA	0	0	TTAGCG	0	0		CGCACC	6	0.0169972	AGCACG	1	0.00242718	GCGGAC	0	0	CCATGG	0	0		ACTTAG	2	0.000456934	AAGGAG	2	0.000549602	GCCTTT	0	0	ACTAGC	0
GCACAC	206	0.0614009	GGCCCG	6	0.00639659	AAACGC	1	0.00537634	GGAGAC	3	0.000348797		GGTCGA	1	0.000194553	AGTTGA	1	0.000152462	ATAGTT	0	0	TTGAAG	0	0		TGCCTA	6	0.0169972	CGTTTA	1	0.00242718	ACCCGG	0	0	CGCACG	0	0		AAACAC	2	0.000456934	CCCCAT	2	0.000549602	GTAAGC	0	0	GCGCCT	0
CTTCGA	206	0.0614009	TAACCA	6	0.00639659	TGGGAT	1	0.00537634	GCGAGA	3	0.000348797		ATCATG	1	0.000194553	TCAGCA	1	0.000152462	TGGCGC	0	0	TTGAAC	0	0		GGTTCA	6	0.0169972	CCAATC	1	0.00242718	CAGCGG	0	0	GGCCGC	0	0		ACGCAA	2	0.000456934	GACCTT	2	0.000549602	CCTTTA	0	0	CGCGTG	0
CATCAC	206	0.0614009	CACATA	6	0.00639659	GGAATC	1	0.00537634	GTCCAC	3	0.000348797		ATCCAC	1	0.000194553	AGGTCC	1	0.000152462	TTCTGG	0	0	AAGTAT	0	0		TGATGC	6	0.0169972	CGTGTG	1	0.00242718	CACCTG	0	0	TAATAG	0	0		AAATCC	2	0.000456934	CCCGCT	2	0.000549602	GACATT	0	0	GACACG	0
ACCCTT	206	0.0614009	GGGAAC	6	0.00639659	CAAGTC	1	0.00537634	GTTCGT	3	0.000348797		ATCCGG	1	0.000194553	ATGCTC	1	0.000152462	TTCTGC	0	0	TTCTTT	0	0		AGGCTG	6	0.0169972	CGTGTC	1	0.00242718	AATTAG	0	0	AGACGA	0	0		ACTTCC	2	0.000456934	GTCACT	2	0.000549602	GCGAAA	0	0	ACAAGA	0
CGACGA	206	0.0614009	TCTTTG	6	0.00639659	TCAACA	1	0.00537634	CACATA	3	0.000348797		ATCCTT	1	0.000194553	CAAGGG	1	0.000152462	GTCTAA	0	0	TTGCGG	0	0		ACACAA	6	0.0169972	GAGTTA	1	0.00242718	GCGTAA	0	0	ATACGG	0	0		AACGGG	2	0.000456934	GTCCGA	2	0.000549602	GCGAAC	0	0	GCGATC	0
CTGCGA	206	0.0614009	TCACAG	6	0.00639659	AGCCGC	1	0.00537634	TGTGAC	3	0.000348797		TTTAAA	1	0.000194553	AGGTCT	1	0.000152462	TCTTCA	0	0	CCTAGA	0	0		TGCAGA	6	0.0169972	CGTTCG	1	0.00242718	ACCTCA	0	0	CATGAG	0	0		AGGACT	2	0.000456934	GTCCCC	2	0.000549602	GCCTTA	0	0	CGTTGC	0
TCGACC	206	0.0614009	ACTGAG	6	0.00639659	GATTCG	1	0.00537634	TAAAGA	3	0.000348797		ATCCTC	1	0.000194553	TACAAT	1	0.000152462	TTGCCT	0	0	CTTCAA	0	0		TGTCTG	6	0.0169972	CGTTCA	1	0.00242718	GCGTCC	0	0	ATCTGG	0	0		CCGACG	2	0.000456934	GTCGTG	2	0.000549602	GGCACT	0	0	GCGCAC	0
GTAACT	206	0.0614009	CGCCGC	6	0.00639659	CAAGGC	1	0.00537634	AGGTTA	3	0.000348797		ATCCTG	1	0.000194553	TTCAGA	1	0.000152462	AAGCTG	0	0	CCCGGA	0	0		GCTGCT	6	0.0169972	CTATAA	1	0.00242718	GCGTAT	0	0	GGATAT	0	0		AACCGC	2	0.000456934	ACTTTT	2	0.000549602	GGCATC	0	0	GCGCAA	0
TCACAT	206	0.0614009	TACTGT	6	0.00639659	AGTGGG	1	0.00537634	CGGCGG	3	0.000348797		ATAGTC	1	0.000194553	ATACGG	1	0.000152462	CCGCCA	0	0	TTGCTG	0	0		CAGCCA	6	0.0169972	TGGGGA	1	0.00242718	GCGGGT	0	0	GGATGA	0	0		CGCTAA	2	0.000456934	GTCGGC	2	0.000549602	GCCTGT	0	0	CACCCA	0
TCCTTG	206	0.0614009	CAATGT	6	0.00639659	ATTTGA	1	0.00537634	CACTCA	3	0.000348797		ATAGTG	1	0.000194553	GTAACA	1	0.000152462	CTGCGA	0	0	TTGCTC	0	0		GGGTGC	6	0.0169972	GTACGT	1	0.00242718	TAAGTG	0	0	GGATCT	0	0		GGCCGG	2	0.000456934	GTCGCA	2	0.000549602	GGCATA	0	0	ATGGAC	0
ACACTT	206	0.0614009	TCCCCG	6	0.00639659	CATCAG	1	0.00537634	ACACCT	3	0.000348797		GCCACA	1	0.000194553	ACACAT	1	0.000152462	CAAGCA	0	0	CGACGT	0	0		AGTACC	6	0.0169972	TCACCT	1	0.00242718	GCGGGC	0	0	AGCGAA	0	0		ACGTGG	2	0.000456934	TAAACA	2	0.000549602	GCCTTC	0	0	ACGTTC	0
ATCGCT	205	0.0611028	ATTCTG	6	0.00639659	GGTTCG	1	0.00537634	CGTGTA	3	0.000348797		ATAGGT	1	0.000194553	GCATTA	1	0.000152462	TTGCGT	0	0	TTGCGT	0	0		ATGTAG	6	0.0169972	AAACAA	1	0.00242718	GCGGTT	0	0	AGAGAA	0	0		ATTAGA	2	0.000456934	GTTTAA	2	0.000549602	CGACGC	0	0	GCTCCA	0
TAGAGA	205	0.0611028	GCTCAT	6	0.00639659	GCTTGG	1	0.00537634	GCGGAG	3	0.000348797		ATATAC	1	0.000194553	CAAAGT	1	0.000152462	TACGTA	0	0	AAGACA	0	0		TGCCGG	6	0.0169972	GTACCC	1	0.00242718	GCGGTC	0	0	CCCGTG	0	0		GGGTCT	2	0.000456934	GTTGGA	2	0.000549602	CCCTAG	0	0	GCTCGC	0
CTGAAT	205	0.0611028	TTCTGG	6	0.00639659	AGCTGT	1	0.00537634	CCTATC	3	0.000348797		GTAGTA	1	0.000194553	TACGCA	1	0.000152462	TTGCTT	0	0	GCCTGG	0	0		TGCCGC	6	0.0169972	AAGGCG	1	0.00242718	GCGGTA	0	0	GCTTGT	0	0		GGGTGC	2	0.000456934	GTCTGT	2	0.000549602	GGCAGC	0	0	GCTCGA	0
TGCAGA	205	0.0611028	TCCCTC	6	0.00639659	GTGTCC	1	0.00537634	TGAGAC	3	0.000348797		ATCATC	1	0.000194553	CAAGTT	1	0.000152462	TTGAGC	0	0	TTGATT	0	0		AGGCAG	6	0.0169972	AATTTT	1	0.00242718	GCGAGA	0	0	GCAGCG	0	0		ACCGGA	2	0.000456934	TAACGG	2	0.000549602	GGCAGA	0	0	GCTCCT	0
GGACGA	205	0.0611028	TCTCCC	6	0.00639659	AAACTT	1	0.00537634	AAAGCC	3	0.000348797		ATATAG	1	0.000194553	TGAGGC	1	0.000152462	CCGGAT	0	0	TGGTGA	0	0		CGCGCG	6	0.0169972	CGGCGT	1	0.00242718	GCGACT	0	0	GGATAC	0	0		ACCCCG	2	0.000456934	TAACGC	2	0.000549602	CGTGGA	0	0	GCTCAA	0
GACCAC	205	0.0611028	AAGCCA	6	0.00639659	AAAACG	1	0.00537634	ACAAGG	3	0.000348797		AAACGT	1	0.000194553	CAAATC	1	0.000152462	GTGTCC	0	0	TTGCCC	0	0		GAGGAA	6	0.0169972	TCACCA	1	0.00242718	CGTATG	0	0	GGATAA	0	0		AGAAGT	2	0.000456934	CGTACT	2	0.000549602	GCCGAT	0	0	ATTATG	0
TTAGGA	205	0.0611028	AACTCG	6	0.00639659	AATGCA	1	0.00537634	AACATC	3	0.000348797		TGCCCC	1	0.000194553	AAGAGT	1	0.000152462	TTGAAT	0	0	GGCCCG	0	0		ACGCAC	6	0.0169972	TCACCC	1	0.00242718	GCGAGT	0	0	GGCAAC	0	0		CTAAAT	2	0.000456934	AATCTT	2	0.000549602	GGCTAA	0	0	CAACGA	0
TGCTCA	205	0.0611028	CGCATT	6	0.00639659	AAGCGG	1	0.00537634	ATTACT	3	0.000348797		AGCTCG	1	0.000194553	CAGATG	1	0.000152462	GGGACC	0	0	TTGCAT	0	0		AGCGCA	6	0.0169972	ATAGCT	1	0.00242718	ACTTTA	0	0	GGCAAA	0	0		CTCCAT	2	0.000456934	TGCTGC	2	0.000549602	GCCCGT	0	0	GCTCAT	0
CGGACC	204	0.0608048	GGGGCG	6	0.00639659	AAAACA	1	0.00537634	AGTCTA	3	0.000348797		ATGACA	1	0.000194553	AGCAGG	1	0.000152462	TCATTA	0	0	TTGCAG	0	0		CAGACC	6	0.0169972	AACTAG	1	0.00242718	GCGAGC	0	0	GGATTT	0	0		ACCTAT	2	0.000456934	TTCAGT	2	0.000549602	GCCGAC	0	0	CTTGGT	0
GTCGTG	204	0.0608048	ATGTTG	6	0.00639659	CAAGAG	1	0.00537634	CTCCTC	3	0.000348797		AGCTAG	1	0.000194553	GCGCCA	1	0.000152462	TTGAGT	0	0	TATGCA	0	0		CACGAC	6	0.0169972	TACTTA	1	0.00242718	GCCTTC	0	0	GGCACA	0	0		GGCCTG	2	0.000456934	GTGTAG	2	0.000549602	TACCCG	0	0	GCTCAC	0
GGACAT	204	0.0608048	TCGGCT	6	0.00639659	AAGGAC	1	0.00537634	GCCCGA	3	0.000348797		GTGTGA	1	0.000194553	CAGAGT	1	0.000152462	TTGAGG	0	0	AGAAAA	0	0		AGGTGG	6	0.0169972	ACTTGA	1	0.00242718	GCCTTA	0	0	GGCAAT	0	0		CAAAGT	2	0.000456934	GTTCCC	2	0.000549602	GTATTG	0	0	GCTGGA	0
GTCCCA	204	0.0608048	ATGGTT	6	0.00639659	TGCCTT	1	0.00537634	ACCACG	3	0.000348797		AGCTGG	1	0.000194553	AAACGT	1	0.000152462	TTTGGC	0	0	TTTGGC	0	0		CTCCTA	6	0.0169972	TAGGTG	1	0.00242718	GCCTGT	0	0	GAAGCT	0	0		ACTAGC	2	0.000456934	ACGCTG	2	0.000549602	GGCGAT	0	0	GCTGCA	0
CTAACT	204	0.0608048	TTAAAT	6	0.00639659	GATTGG	1	0.00537634	GCCGAT	3	0.000348797		ATTGCC	1	0.000194553	AGCTCC	1	0.000152462	TCAGTC	0	0	CGCGCG	0	0		GCACAT	6	0.0169972	TACTGT	1	0.00242718	CCTAAG	0	0	GGATGT	0	0		TGCGGT	2	0.000456934	GTTAAC	2	0.000549602	GCCGCA	0	0	GCTGAT	0
CCACAG	204	0.0608048	CGACTC	6	0.00639659	TGCCTC	1	0.00537634	AAGTAT	3	0.000348797		AGGACT	1	0.000194553	ATTAGC	1	0.000152462	TTTGCT	0	0	TTTGTT	0	0		GATCCA	6	0.0169972	AAGCGC	1	0.00242718	GCGAAC	0	0	CAAGAG	0	0		GGCCTT	2	0.000456934	GTGTTC	2	0.000549602	GGCTAC	0	0	GCACAA	0
[truncated: 2,733 more rows]
[truncated: 25 more columns]
